# Supplementary material for: Gene discovery and polygenic prediction from a genome-wide association study of educational attainment in 1.1 million individuals
Source: Springer Nature journal article supplement (doi:10.1038/s41588-018-0147-3), 2018-07-20
Supplement: 41588_2018_147_MOESM3_ESM.xlsx [file 41588_2018_147_MOESM3_ESM.xlsx]

## Sheet: 1. LDSC_h^2
Supplementary Table 1. LDSC Estimates of SNP-based heritability for main and supplemental GWAS
	N	# SNPs (M)	h2	SE	λGC	Mean χ2	Intercept	SE	Ratio	SE
EduYears	1.13188e+06	10016265	0.122	0.003	2.807	3.812	1.113	0.022	0.04	0.008
Math Ability (Self-Report)	564692	9444282	0.156	0.005	2.249	2.818	1.074	0.015	0.041	0.008
Hardest Math Class	430439	9444282	0.165	0.005	2.045	2.499	1.105	0.015	0.07	0.01
Cognitive Performance	257841	10098325	0.209	0.007	1.784	2.108	1.045	0.013	0.041	0.012
Notes: Output of various statistics from LD Score regressions with the summary statistics from GWAS. The statistics were computed using the LDSC python software package [1] and the “eur_w_ld_chr/” files of LD Scores calculated by Finucane et al. [2]. For all phenotypes, the reported heritabilities are on the observed scale (not liability scale). In the LD Score regressions, we include only HapMap…
References
[1] Bulik-Sullivan, B. K. et al., LD Score regression distinguishes confounding from polygenicity in genome-wide association studies. Nat. Genet. 47, 291–295 (2015).
[2] H. K. Finucane et al., Partitioning heritability by functional category using GWAS summary statistics. Nat. Genet. 47, 1228–1235 (2015).

## Sheet: 2. EduYears Lead SNPs
Supplementary Table 2. Association results for the 1271 independent SNPs that reached genome-wide significance (P < 5×10-8) in the pooled-sex GWAS of EduYears
SNP	Chr	Position	Allele 1	Allele2	Frequency Allele 1	Effect size	SE	P-value	Hetero I2	Hetero P	N
rs9859556	3	49455986	T	G	0.3132	0.029	0.0015	4.61e-82	10.2	0.2409	1.13188e+06
rs7029718	9	23358495	A	G	0.4108	0.0244	0.0014	7.82e-65	6.8	0.3192	1116832
rs1334297	13	58335375	A	G	0.7375	0.0257	0.0016	2.53e-58	0	0.9306	1.13108e+06
rs9375188	6	98555272	T	C	0.4847	0.0212	0.0014	8.78e-52	0	0.6709	1.13134e+06
rs2526398	3	50187596	C	G	0.3468	-0.0222	0.0015	2.47e-51	17.9	0.1061	1.12822e+06
rs13018640	2	100821545	T	C	0.6017	-0.0215	0.0014	1.05e-50	23	0.0471	1131881
rs34305371	1	72733610	A	G	0.0985	0.0314	0.0024	1.1e-39	20.1	0.0853	1102142
rs6449503	5	60095272	A	G	0.5038	0.0185	0.0014	1.84e-39	11.8	0.2102	1129371
rs1689510	12	56396768	C	G	0.3315	0.0194	0.0015	1.35e-38	15.7	0.1363	1.13188e+06
rs11082011	18	35145122	T	C	0.6716	0.0194	0.0015	2.06e-38	24.5	0.0358	1131881
rs1008078	1	91189731	T	C	0.4019	-0.0182	0.0014	4.5e-37	0	0.5037	1130168
rs61104616	5	88163771	A	G	0.5249	-0.0172	0.0014	1.56e-34	5.5	0.3471	1131084
rs12076635	1	44026656	C	G	0.7811	0.0207	0.0017	3.33e-34	0	0.8455	1.13188e+06
rs66568921	3	85672018	T	G	0.6441	-0.0181	0.0015	7.6e-34	18.6	0.0951	1.09525e+06
rs56319902	17	43871982	T	C	0.2155	-0.0206	0.0017	5.81e-33	40.8	0.0008	1105078
rs73344830	10	103816828	A	G	0.4181	0.017	0.0014	1e-32	0	0.5616	1128651
rs11678980	2	162101261	A	G	0.4527	-0.0166	0.0014	1.6e-31	0	0.7019	1116010
rs11588857	1	204587047	A	G	0.2131	0.0199	0.0017	4.45e-31	5.3	0.3504	1.13188e+06
rs10773002	12	123746961	A	T	0.252	0.0185	0.0016	2.5e-30	5.7	0.3428	1.13188e+06
rs176218	14	29600506	T	G	0.1958	0.02	0.0018	1.1e-29	8.1	0.2859	1.13188e+06
rs7849487	9	1757274	T	G	0.6578	-0.0167	0.0015	1.25e-29	0	0.5038	1.12945e+06
rs10189857	2	60713235	A	G	0.5654	0.0158	0.0014	4.69e-29	0	0.6115	1131881
rs4787457	16	28555400	A	G	0.6339	0.0162	0.0015	1.23e-28	40.1	0.0004	1.13108e+06
rs4919624	10	104021085	A	G	0.8022	0.0193	0.0018	6.52e-28	0	0.9668	1.13108e+06
rs111226181	3	49931760	T	G	0.1773	-0.0201	0.0018	1.35e-27	19.9	0.0793	1.11934e+06
rs35417702	7	71739916	T	C	0.5235	-0.0152	0.0014	2.4e-27	12.9	0.1863	1.13188e+06
rs55736314	3	71586293	C	G	0.599	-0.0154	0.0014	4.59e-27	0.7	0.4608	1.12962e+06
rs6452793	5	87818174	T	G	0.234	0.0175	0.0017	4.47e-26	0	0.6967	1.12937e+06
rs10215082	7	92657985	A	G	0.4661	-0.0149	0.0014	7.03e-26	12.5	0.1975	1117629
rs1320139	2	144158177	C	G	0.427	-0.0149	0.0014	7.62e-26	0	0.5739	1131881
rs62262671	3	49649873	A	G	0.8634	0.0213	0.002	2.22e-25	16.8	0.1188	1.13188e+06
rs3897821	1	243420388	A	G	0.6654	0.0154	0.0015	3.58e-25	7.7	0.2975	1130168
rs6557171	6	152234593	T	C	0.3232	-0.0155	0.0015	5.48e-25	0	0.5967	1131881
rs13240401	7	2194396	T	C	0.7812	0.0176	0.0017	2.36e-24	14.6	0.1571	1.09525e+06
rs2568955	1	72762169	T	C	0.2481	-0.0165	0.0016	2.51e-24	0	0.8279	1.13017e+06
rs324885	5	87897271	A	C	0.5257	0.0142	0.0014	4.11e-24	2.2	0.4264	1.12937e+06
rs363096	4	3180021	T	C	0.4245	-0.0143	0.0014	5.77e-24	30	0.0108	1131881
rs10931821	2	199495830	A	T	0.4852	-0.0141	0.0014	8.65e-24	2.6	0.4163	1130053
rs76076331	2	10977585	T	C	0.1346	0.0206	0.0021	1.71e-23	0	0.6891	1.1277e+06
rs2992037	1	43949810	A	G	0.3223	0.0149	0.0015	4.18e-23	0	0.7148	1130168
rs17411339	18	50807359	A	G	0.5612	0.014	0.0014	5.1e-23	0	0.5374	1.13188e+06
rs7683416	4	106152984	T	C	0.4592	0.0139	0.0014	6.05e-23	3.6	0.3923	1131881
rs12028010	1	41764471	T	C	0.7711	0.0164	0.0017	9.78e-23	6.2	0.3295	1.13188e+06
rs113520408	7	128402782	A	G	0.2756	0.0155	0.0016	1.03e-22	5.7	0.3437	1119342
rs12375949	9	124617900	T	C	0.4312	-0.0138	0.0014	1.61e-22	0	0.8687	1131084
rs71413877	2	100924822	A	G	0.041	0.0351	0.0036	2.66e-22	9	0.2863	1.08622e+06
rs11157931	14	23403193	A	C	0.3924	-0.0139	0.0014	3.86e-22	3.4	0.3968	1131881
rs9490512	6	98537993	A	G	0.4496	-0.0136	0.0014	4e-22	1.8	0.435	1130168
rs9411331	9	134883419	A	C	0.684	0.0145	0.0015	7.63e-22	0	0.6982	1.13108e+06
rs72819118	2	100451357	T	C	0.0942	-0.0231	0.0024	8.29e-22	3.6	0.394	1.12277e+06
rs660001	5	113866598	A	G	0.2113	-0.0164	0.0017	1.66e-21	7.5	0.3014	1.13108e+06
rs7924036	10	65191645	T	G	0.5124	0.0133	0.0014	2.55e-21	0.1	0.4746	1131084
rs12468040	2	44854981	T	G	0.3819	0.0137	0.0014	3.12e-21	5.6	0.3445	1131881
rs13010288	2	51824512	T	G	0.1288	0.0198	0.0021	3.44e-21	21.6	0.061	1.13134e+06
rs4500960	2	162818621	T	C	0.4647	-0.0131	0.0014	1.04e-20	0	0.584	1131881
rs1054442	12	49389320	A	C	0.6223	-0.0136	0.0015	1.1e-20	11.7	0.2134	1115683
rs746839	8	142617261	C	G	0.6283	0.0135	0.0015	1.19e-20	7.4	0.3061	1127425
rs11772232	7	1856273	T	C	0.1691	0.0177	0.0019	1.2e-20	0	0.5036	1.10122e+06
rs4490539	5	60685757	A	G	0.6983	0.0142	0.0015	1.31e-20	0	0.5789	1131084
rs10810099	9	14161927	A	G	0.2734	-0.0146	0.0016	1.91e-20	9.1	0.2655	1131084
rs9616947	22	51151631	T	C	0.3818	-0.0134	0.0015	3.58e-20	0	0.5463	1113068
rs7590368	2	10961474	T	C	0.7335	-0.0146	0.0016	3.98e-20	0	0.7611	1.13188e+06
rs12506221	4	67899235	T	G	0.436	-0.013	0.0014	4.23e-20	0	0.6781	1.13188e+06
rs10875121	1	98417446	C	G	0.8361	0.0174	0.0019	4.46e-20	0	0.5844	1.13188e+06
rs12761761	10	133775375	T	C	0.2395	0.0153	0.0017	4.79e-20	11.3	0.2304	1.09401e+06
rs2725370	8	30852826	T	C	0.3017	-0.0141	0.0015	4.96e-20	26.9	0.0238	1118545
rs56391344	15	78006899	A	G	0.2526	0.0148	0.0016	7.49e-20	0	0.6555	1.12694e+06
rs72962169	11	72365669	T	C	0.1595	-0.0174	0.0019	1.26e-19	0	0.8799	1.13017e+06
rs11675476	2	193853269	T	C	0.5224	-0.0127	0.0014	1.37e-19	17.9	0.1037	1.13188e+06
rs2838006	21	42653567	T	C	0.3597	0.0132	0.0015	1.38e-19	0	0.8475	1131084
rs72828517	6	19036035	T	C	0.8273	-0.0168	0.0019	1.38e-19	0	0.5762	1.13188e+06
rs11774212	8	145686505	T	C	0.5163	0.0128	0.0014	1.4e-19	6	0.3393	1121435
rs72829857	6	16966052	A	G	0.761	-0.0149	0.0016	1.52e-19	0	0.6557	1.13017e+06
rs17568389	7	8091876	A	T	0.5087	0.0127	0.0014	1.62e-19	0	0.5625	1131881
rs2179152	6	26325888	T	C	0.3673	-0.0131	0.0015	1.68e-19	13	0.1838	1131881
rs79265434	7	24621381	A	G	0.8834	-0.0197	0.0022	1.98e-19	11.8	0.2074	1131881
rs62182994	2	212599303	T	C	0.6894	0.0137	0.0015	2.55e-19	18.1	0.1037	1118798
rs7323027	13	58693790	A	G	0.3719	0.013	0.0015	3.91e-19	0	0.9204	1131084
rs2290601	3	108112760	T	C	0.772	-0.0149	0.0017	4.49e-19	0	0.9667	1.13188e+06
rs178183	14	26979412	T	C	0.2455	0.0145	0.0016	4.81e-19	0	0.6832	1.13188e+06
rs171697	5	103956516	C	G	0.6712	0.0133	0.0015	4.85e-19	0	0.6674	1131084
rs112375785	6	98224217	A	G	0.1435	0.0184	0.0021	6e-19	22.8	0.0801	1.06242e+06
rs6065080	20	59832791	T	C	0.3589	-0.013	0.0015	7.49e-19	0	0.7187	1.13188e+06
rs2545795	5	176887106	A	C	0.4437	0.0125	0.0014	1.03e-18	2	0.4298	1.12504e+06
rs4757957	11	12881398	C	G	0.6911	0.0133	0.0015	1.79e-18	10.7	0.2325	1130168
rs613872	18	53210302	T	G	0.8285	-0.0163	0.0019	1.95e-18	0	0.8692	1131881
rs13107325	4	103188709	T	C	0.0721	-0.0239	0.0027	1.98e-18	8.2	0.2912	1113598
rs728054	7	137072364	A	G	0.3561	-0.0128	0.0015	2.34e-18	0	0.701	1131881
rs57352738	7	133304694	A	T	0.204	-0.0152	0.0017	2.51e-18	0	0.5744	1131881
rs10460095	18	22624708	A	G	0.5714	-0.0124	0.0014	2.61e-18	19.3	0.0846	1131881
rs790647	10	106776484	A	C	0.2278	-0.0145	0.0017	3.81e-18	1.7	0.4379	1.13108e+06
rs9349956	6	14718260	A	C	0.8211	-0.0159	0.0018	4.89e-18	13.9	0.1751	1.123e+06
rs6715849	2	100306378	A	G	0.4401	-0.0122	0.0014	6.87e-18	0	0.8185	1130168
rs575113	1	110046373	A	G	0.2941	0.0133	0.0015	7.52e-18	17.4	0.1115	1130168
rs76577427	1	110761099	C	G	0.9006	0.0203	0.0024	7.78e-18	0	0.9407	1.1152e+06
rs9616906	22	51104680	A	G	0.4477	0.0122	0.0014	8.31e-18	6.1	0.336	1125765
rs4719944	7	3496032	T	C	0.5462	-0.0121	0.0014	9.25e-18	0	0.5888	1131881
rs9289300	3	127144988	T	C	0.8412	-0.0164	0.0019	1e-17	0	0.8855	1.13188e+06
rs7920624	10	67963186	A	T	0.4783	0.012	0.0014	1.06e-17	12.7	0.1921	1131084
rs72671456	14	29662737	A	G	0.1374	-0.0174	0.002	1.27e-17	0	0.6066	1.13188e+06
rs12643771	4	140753103	T	C	0.3094	0.013	0.0015	1.32e-17	0	0.4867	1130168
rs4726070	7	151328218	A	G	0.6021	0.0122	0.0014	1.36e-17	3.8	0.3869	1131881
rs362307	4	3241845	T	C	0.0772	-0.0226	0.0027	1.55e-17	11.6	0.2221	1.11175e+06
rs11210400	1	74490459	A	C	0.538	0.012	0.0014	1.63e-17	0	0.6395	1129448
rs17563464	5	26913774	A	C	0.2173	-0.0147	0.0017	1.74e-17	13.7	0.1908	1.0921e+06
rs717996	12	84133820	T	C	0.5986	-0.0122	0.0014	1.89e-17	3.2	0.4023	1130168
rs7526112	1	93747683	T	G	0.6406	0.0124	0.0015	2.07e-17	9	0.2664	1.13188e+06
rs17502934	2	50994255	T	G	0.1489	-0.0167	0.002	2.12e-17	4.6	0.3684	1.13188e+06
rs9882532	3	16865845	T	C	0.6368	0.0124	0.0015	2.15e-17	0	0.8199	1131881
rs6493265	15	47513253	T	C	0.3915	-0.0122	0.0014	2.26e-17	0	0.8512	1131084
rs17489649	5	109156184	A	G	0.6788	0.0127	0.0015	2.77e-17	0	0.8125	1129371
rs76878669	11	66092567	C	G	0.7609	0.0141	0.0017	3.1e-17	9.2	0.2646	1.0933e+06
rs10496091	2	61482261	A	G	0.2841	-0.0131	0.0016	3.71e-17	10.6	0.2315	1131881
rs4467547	4	21945933	T	G	0.407	0.0121	0.0014	4.88e-17	15.2	0.1478	1.11763e+06
rs3026996	1	159167290	A	C	0.7606	0.0138	0.0016	5.42e-17	5.1	0.3567	1130168
rs72624911	3	49064576	T	C	0.0475	0.0282	0.0034	5.59e-17	12.7	0.221	1.081e+06
rs9933256	16	1246748	A	G	0.5558	0.0119	0.0014	6.06e-17	0	0.7508	1.1174e+06
rs2923424	8	42382222	A	G	0.6069	0.012	0.0014	6.31e-17	26	0.0291	1126938
rs635754	1	96484940	A	G	0.5809	0.0119	0.0014	6.36e-17	6.1	0.3327	1131881
rs17428076	2	172851936	C	G	0.7598	0.0137	0.0016	6.41e-17	1.1	0.4525	1.13188e+06
rs7977614	12	110115286	A	G	0.7143	-0.0134	0.0016	6.84e-17	0	0.753	1056635
rs77609760	2	142358950	A	G	0.9346	0.0236	0.0028	7.71e-17	15.9	0.1335	1.13188e+06
rs12591647	15	65959729	T	C	0.8171	-0.0152	0.0018	7.78e-17	10.4	0.2416	1.12296e+06
rs6824567	4	2883172	T	C	0.2827	0.013	0.0016	8.91e-17	0	0.6272	1131881
rs12957463	18	37412228	A	G	0.7953	0.0146	0.0018	9.2e-17	0	0.5081	1114050
rs2496482	14	99750164	T	C	0.4161	0.0121	0.0015	9.2e-17	0	0.4978	1087758
rs11663602	18	77578191	A	C	0.2761	-0.013	0.0016	9.27e-17	0	0.9417	1.13105e+06
rs75177132	19	4386911	T	C	0.0476	0.0298	0.0036	1.01e-16	6.8	0.3693	954196
rs10899282	11	76504698	A	G	0.2279	0.014	0.0017	1.05e-16	13.8	0.1777	1.11076e+06
rs2081652	4	159862913	A	T	0.661	0.0123	0.0015	1.09e-16	0	0.9177	1.13134e+06
rs7974852	12	14511679	A	C	0.5235	0.0117	0.0014	1.14e-16	11.8	0.2093	1.11934e+06
rs13318986	3	82533639	A	G	0.3311	0.0124	0.0015	1.17e-16	0	0.6084	1.12774e+06
rs2570497	2	104441546	T	C	0.6367	-0.0121	0.0015	1.27e-16	0	0.493	1.13188e+06
rs17598675	4	176647637	T	C	0.5132	-0.0116	0.0014	1.37e-16	0	0.6567	1131337
rs34155847	4	3252130	A	G	0.2483	0.0135	0.0016	1.43e-16	7.5	0.3056	1.11593e+06
rs11121177	1	8445946	A	G	0.1785	0.0151	0.0018	1.44e-16	0.5	0.4659	1.13134e+06
rs34106693	2	101151830	C	G	0.8318	0.0159	0.0019	1.62e-16	5	0.3622	1.07153e+06
rs4984682	16	740404	C	G	0.7674	-0.0138	0.0017	1.82e-16	10.1	0.2485	1111406
rs6704768	2	233592501	A	G	0.5648	-0.0116	0.0014	1.84e-16	0	0.8486	1130540
rs114468556	5	92870246	A	T	0.0421	0.0293	0.0036	1.99e-16	5.8	0.3519	1.0843e+06
rs1569092	1	74858724	A	G	0.152	0.016	0.002	2.12e-16	7.5	0.301	1.13188e+06
rs4691601	4	160599341	A	T	0.4571	-0.0115	0.0014	2.46e-16	0	0.5445	1.13188e+06
rs2910823	5	59498175	T	G	0.5359	0.0115	0.0014	2.5e-16	0.7	0.4598	1.12937e+06
rs10984445	9	121980586	A	G	0.4604	0.0115	0.0014	2.58e-16	0	0.636	1.13108e+06
rs34098770	16	12237812	A	G	0.152	-0.016	0.002	2.95e-16	20.4	0.0726	1.13188e+06
rs6569077	6	98212409	T	C	0.3894	0.0118	0.0014	3.29e-16	0	0.7205	1.11637e+06
rs4984541	15	96911139	A	G	0.7666	-0.0138	0.0017	3.4e-16	0	0.5431	1081940
rs7326331	13	91615838	A	G	0.2761	-0.0128	0.0016	3.42e-16	0	0.5617	1.13108e+06
rs62260764	3	47990500	C	G	0.2559	-0.0132	0.0016	3.45e-16	0	0.5831	1.11934e+06
rs9655780	7	104667334	A	G	0.8287	-0.0153	0.0019	3.7e-16	0.5	0.4645	1.11765e+06
rs737945	22	30202774	C	G	0.4442	-0.0115	0.0014	3.73e-16	18.8	0.0919	1131881
rs10166286	2	101128095	T	C	0.173	0.0151	0.0019	3.79e-16	0	0.5642	1.13188e+06
rs12646523	4	170944698	T	C	0.2483	-0.0132	0.0016	3.79e-16	0	0.5995	1131881
rs13163062	5	106955451	T	C	0.426	0.0115	0.0014	4.43e-16	2.4	0.4215	1131084
rs6442126	3	48525955	A	T	0.6593	-0.0121	0.0015	4.72e-16	3.8	0.3906	1113793
rs11081529	18	75902735	T	C	0.7112	0.0126	0.0015	5.22e-16	13.4	0.1781	1130168
rs73581580	9	140251458	A	G	0.1248	-0.0181	0.0022	5.78e-16	2.7	0.4238	1.01686e+06
rs5754753	22	34296751	T	C	0.7178	-0.0126	0.0016	6.15e-16	0	0.5659	1131881
rs1656614	15	47800513	C	G	0.314	0.0122	0.0015	6.91e-16	19	0.0914	1129371
rs6690195	1	96221653	T	C	0.4907	-0.0113	0.0014	7.89e-16	0	0.7054	1131337
rs35319653	4	140903155	T	C	0.3433	0.0119	0.0015	8.01e-16	0	0.9424	1.13188e+06
rs62247449	3	64430551	C	G	0.4357	0.0114	0.0014	8.79e-16	19.9	0.0789	1130168
rs6918506	6	26577857	C	G	0.5379	0.0113	0.0014	9.57e-16	5.4	0.3495	1130168
rs115000530	3	69930625	A	T	0.9451	-0.025	0.0031	1.09e-15	47.9	1.81e-05	1.10379e+06
rs10979613	9	111687584	T	C	0.6389	-0.0117	0.0015	1.25e-15	0	0.8613	1131084
rs17248751	16	61579618	A	G	0.7827	-0.0136	0.0017	1.28e-15	0	0.8733	1.12937e+06
rs2998299	14	84997363	T	G	0.2137	-0.0136	0.0017	1.51e-15	22.4	0.0526	1.13188e+06
rs10041403	5	67805272	T	C	0.8339	0.0151	0.0019	1.55e-15	0	0.8321	1.11854e+06
rs11115056	12	82258775	A	G	0.0995	0.0187	0.0023	1.67e-15	17.5	0.1142	1128473
rs62379838	5	120102028	T	C	0.6953	0.0121	0.0015	1.77e-15	0	0.6737	1131084
rs73961845	2	144478983	A	G	0.617	-0.0114	0.0014	2.52e-15	9.3	0.2608	1131881
rs11736863	4	23729566	A	G	0.1895	0.0142	0.0018	2.56e-15	18.3	0.0989	1.11934e+06
rs3812281	7	135082751	T	C	0.6016	0.0113	0.0014	2.7e-15	14.4	0.1606	1.12945e+06
rs9556958	13	99100046	T	C	0.5233	-0.011	0.0014	5.96e-15	8.7	0.2768	1.12914e+06
rs6932108	6	98713992	C	G	0.0798	-0.021	0.0027	6.1e-15	27.9	0.0255	1044043
rs11732657	4	172427073	A	G	0.7504	-0.0126	0.0016	6.24e-15	14.5	0.158	1.13017e+06
rs13422673	2	155474355	T	C	0.4659	-0.011	0.0014	6.48e-15	9.7	0.2525	1131881
rs2052285	16	51188432	A	G	0.5959	0.0112	0.0014	7.25e-15	12.5	0.2076	1120057
rs27220	5	59775136	A	G	0.3562	-0.0114	0.0015	7.52e-15	3.9	0.3849	1131084
rs488476	11	95543715	C	G	0.6191	-0.0113	0.0015	8.29e-15	7.6	0.2982	1119342
rs978807	18	36898459	A	G	0.1885	0.0139	0.0018	9.14e-15	18.8	0.0909	1.13188e+06
rs28512462	16	24711806	C	G	0.3789	0.0112	0.0014	9.77e-15	0	0.854	1130540
rs3895736	3	48658467	A	C	0.1728	0.0144	0.0019	9.92e-15	13.1	0.1871	1117647
rs2764684	1	58537919	T	C	0.8266	0.0143	0.0019	9.99e-15	11.3	0.22	1.12945e+06
rs10892807	11	121998254	T	C	0.5671	0.0109	0.0014	1.09e-14	13.8	0.1714	1130168
rs17669337	5	92187932	T	C	0.4133	-0.011	0.0014	1.1e-14	0	0.5413	1131084
rs12342546	9	126329270	A	G	0.2441	-0.0128	0.0017	1.11e-14	0	0.6485	1.09445e+06
rs61527214	16	83608599	A	G	0.4113	0.011	0.0014	1.13e-14	0.2	0.4732	1.12937e+06
rs8024	1	201845575	A	C	0.3294	-0.0115	0.0015	1.13e-14	15.3	0.1426	1131881
rs7603132	2	4951548	A	G	0.1938	0.0137	0.0018	1.2e-14	3.5	0.396	1.12455e+06
rs10940921	5	30808645	T	G	0.4194	0.0111	0.0014	1.31e-14	10.3	0.2411	1.09445e+06
rs6731373	2	68503044	A	G	0.339	-0.0115	0.0015	1.39e-14	0	0.9131	1115910
rs350281	16	12231739	T	G	0.6825	-0.0117	0.0015	1.41e-14	20.3	0.078	1115196
rs303752	18	21074255	A	G	0.4067	-0.011	0.0014	1.47e-14	33	0.0053	1129281
rs767943	6	23446691	A	C	0.269	-0.0122	0.0016	1.54e-14	15.5	0.1413	1.13017e+06
rs9375403	6	98831636	C	G	0.2423	0.0126	0.0016	1.66e-14	0.4	0.4684	1117629
rs7254263	19	30741257	T	C	0.285	-0.0119	0.0016	1.84e-14	24.1	0.0416	1126906
rs11716398	3	50699715	A	G	0.8663	0.0159	0.0021	1.89e-14	13.7	0.1743	1.11763e+06
rs803619	1	44465419	T	C	0.1076	-0.0173	0.0023	2.19e-14	7.5	0.3042	1.12497e+06
rs4320563	8	87769961	A	G	0.5093	0.0109	0.0014	2.24e-14	0	0.5296	1094453
rs11871429	17	42920929	A	G	0.7727	0.0128	0.0017	2.52e-14	0	0.7638	1.13188e+06
rs10761251	9	96421546	A	T	0.6633	0.0113	0.0015	2.52e-14	17.9	0.1055	1.13108e+06
rs6493275	15	47676579	A	T	0.7885	0.0131	0.0017	2.98e-14	23.1	0.0479	1.13108e+06
rs1866823	8	57436577	A	G	0.5444	0.0107	0.0014	3.09e-14	0	0.8871	1126120
rs7575637	2	145796251	A	G	0.4538	0.0107	0.0014	3.43e-14	0	0.7816	1131881
rs9529146	13	31785404	T	C	0.2282	0.0127	0.0017	3.48e-14	4.6	0.3698	1.13017e+06
rs35016816	16	10266115	T	C	0.899	0.0176	0.0023	3.56e-14	0	0.7827	1.13188e+06
rs4848924	2	124991887	A	C	0.71	-0.0117	0.0015	3.56e-14	17.8	0.1054	1131881
rs2406253	7	100077273	A	G	0.8053	0.0135	0.0018	3.58e-14	0	0.4906	1122109
rs9267677	6	31892641	T	C	0.9029	0.018	0.0024	3.66e-14	0	0.735	1126993
rs1747714	10	11161316	T	C	0.5287	0.0106	0.0014	3.82e-14	7.1	0.311	1131337
rs929511	7	8003017	T	C	0.1254	-0.016	0.0021	3.91e-14	0	0.9676	1.12773e+06
rs7108020	11	131289820	A	C	0.6475	0.0111	0.0015	3.91e-14	0	0.8175	1.13005e+06
rs1729412	2	201083598	T	C	0.4224	-0.0107	0.0014	4.05e-14	0	0.9629	1131881
rs10057590	5	124335247	A	C	0.4724	0.0106	0.0014	4.08e-14	16.3	0.1299	1129371
rs77702819	2	101328728	T	G	0.0907	0.0187	0.0025	4.17e-14	0	0.7976	1.10698e+06
rs6450476	5	57771087	A	G	0.2929	-0.0116	0.0015	4.62e-14	0	0.6136	1131084
rs12602286	17	19236954	T	G	0.8731	0.016	0.0021	4.62e-14	0	0.7094	1.12292e+06
rs13163845	5	3264389	T	C	0.8488	-0.0149	0.002	4.66e-14	34.4	0.0049	1.10525e+06
rs12273435	11	133825855	A	G	0.207	-0.0132	0.0017	4.72e-14	0	0.4938	1.10892e+06
rs77999825	7	127572977	A	G	0.0343	0.0294	0.0039	5.08e-14	0	0.6937	1.10279e+06
rs10798888	1	32199099	T	G	0.1725	-0.014	0.0019	5.15e-14	23.5	0.0466	1.1255e+06
rs7931563	11	61446425	T	G	0.6214	-0.0109	0.0014	5.15e-14	0	0.5606	1.12822e+06
rs1128956	4	183724005	T	G	0.8251	-0.014	0.0019	5.34e-14	0	0.797	1.1078e+06
rs17565975	11	111586950	A	G	0.5563	-0.0106	0.0014	5.54e-14	0	0.9662	1131881
rs12332731	5	93033082	A	T	0.1882	0.0135	0.0018	5.96e-14	6.4	0.3272	1.13054e+06
rs12712269	2	107564115	T	C	0.3962	-0.0107	0.0014	6.88e-14	0	0.7445	1131881
rs12170452	22	40019773	A	G	0.4507	0.0105	0.0014	7.78e-14	10.2	0.2397	1131881
rs58921703	7	2322943	T	C	0.3698	0.0109	0.0015	7.84e-14	14.6	0.163	1.12142e+06
rs1405876	7	86237581	T	G	0.6403	0.0109	0.0015	7.84e-14	8.2	0.2861	1.13017e+06
rs10515007	17	50395539	T	C	0.161	0.0143	0.0019	8.07e-14	0	0.7185	1131881
rs35493937	2	65571139	C	G	0.2305	0.0124	0.0017	9.73e-14	33	0.005	1.12945e+06
rs11599236	10	106454672	T	C	0.5838	-0.0106	0.0014	9.94e-14	22	0.0586	1129371
rs7972246	12	27209328	T	C	0.3451	0.011	0.0015	1.01e-13	0	0.7187	1.13188e+06
rs7640424	3	107820063	T	C	0.3063	0.0113	0.0015	1.02e-13	11.4	0.2171	1130168
rs11620355	13	92044587	A	G	0.0912	0.0182	0.0025	1.09e-13	16.7	0.1241	1.11855e+06
rs4396896	3	86261800	A	T	0.3916	-0.0107	0.0014	1.12e-13	5.5	0.346	1131881
rs401526	8	130929166	T	C	0.5258	-0.0104	0.0014	1.15e-13	0	0.9451	1131084
rs12478156	2	164379658	T	C	0.6378	0.0108	0.0015	1.24e-13	15.3	0.145	1.13134e+06
rs2287838	19	9959014	A	G	0.5504	-0.0104	0.0014	1.27e-13	38.6	0.0007	1131881
rs6697584	1	181509718	T	C	0.7852	-0.0126	0.0017	1.43e-13	9.3	0.2624	1129448
rs12571549	10	111770013	A	G	0.1368	0.0151	0.002	1.45e-13	0	0.6911	1.13108e+06
rs141729694	5	87999371	T	C	0.0768	0.0195	0.0026	1.49e-13	0	0.8455	1.13054e+06
rs1464297	2	140653749	T	C	0.649	-0.0109	0.0015	1.49e-13	0	0.9703	1131881
rs118134876	7	11500372	T	C	0.0578	-0.0223	0.003	1.5e-13	1.4	0.4445	1125764
rs17551064	7	49869771	A	G	0.8378	0.0141	0.0019	1.53e-13	11.4	0.218	1.13017e+06
rs1490612	4	106410855	T	G	0.078	0.0193	0.0026	1.55e-13	0	0.5891	1.13097e+06
rs9853928	3	103295384	T	C	0.2102	-0.0127	0.0017	1.59e-13	0	0.4954	1.13188e+06
rs4500930	2	228985505	T	C	0.3449	-0.0109	0.0015	1.67e-13	0	0.795	1131881
rs4352658	6	88279872	T	C	0.081	-0.019	0.0026	1.71e-13	0	0.6697	1.12945e+06
rs12875339	13	55722033	A	C	0.6449	-0.0108	0.0015	1.71e-13	13.6	0.1749	1.13108e+06
rs10060023	5	124304677	T	C	0.3276	0.011	0.0015	1.88e-13	19	0.0917	1129371
rs34720381	1	171455322	T	C	0.0907	-0.018	0.0024	1.9e-13	0	0.5963	1.13188e+06
rs7460106	8	143534777	T	C	0.762	-0.0123	0.0017	2.06e-13	23.2	0.0657	1.10158e+06
rs10805383	5	63034606	A	G	0.4879	-0.0103	0.0014	2.22e-13	0	0.5925	1131084
rs61997667	14	57280046	T	C	0.1511	-0.0144	0.002	2.24e-13	0	0.613	1131881
rs55986781	2	60655551	T	C	0.0823	0.0187	0.0026	2.27e-13	0	0.6861	1128473
rs11657342	17	79355294	A	G	0.367	0.014	0.0019	2.32e-13	0	0.7284	652583
rs13085461	3	24950387	C	G	0.474	0.0103	0.0014	2.4e-13	11	0.2231	1.13188e+06
rs2256965	6	31555130	A	G	0.4188	0.0106	0.0014	2.4e-13	0	0.8647	1099265
rs11542663	6	119215402	A	C	0.6947	0.0112	0.0015	2.44e-13	0	0.9777	1130168
rs144336753	8	143356114	A	G	0.0181	0.0388	0.0053	2.56e-13	0	0.5253	1.11292e+06
rs12145078	1	197822977	A	T	0.2074	-0.0127	0.0017	2.56e-13	0	0.8399	1131881
rs4426420	18	35104386	T	C	0.16	-0.014	0.0019	2.63e-13	0	0.9752	1.13017e+06
rs17048801	4	137529847	A	T	0.3909	-0.0106	0.0014	2.75e-13	16.3	0.1337	1115934
rs1120924	4	5228939	T	C	0.3362	0.0108	0.0015	2.79e-13	22.2	0.0544	1.13188e+06
rs2478208	13	81471113	C	G	0.5204	-0.0103	0.0014	2.89e-13	0	0.6468	1.12937e+06
rs2364544	1	41833162	A	G	0.3912	-0.0105	0.0014	2.91e-13	26.2	0.0272	1127735
rs1167827	7	75163169	A	G	0.4347	0.0104	0.0014	2.93e-13	10	0.2509	1113213
rs28735993	22	51135595	A	T	0.8844	0.0162	0.0022	3.03e-13	19.8	0.0964	1.10433e+06
rs56099375	8	77372988	T	C	0.241	0.012	0.0017	3.1e-13	15.3	0.1517	1.11514e+06
rs17048855	3	8258174	A	G	0.3426	0.0108	0.0015	3.1e-13	19.3	0.0862	1130168
rs479018	11	66060546	A	G	0.3255	0.0109	0.0015	3.1e-13	5.8	0.3424	1.12985e+06
rs585557	11	65663547	A	G	0.8014	0.0128	0.0018	3.25e-13	23.8	0.0433	1.12773e+06
rs10951590	7	39091043	T	C	0.3275	-0.0109	0.0015	3.62e-13	13.3	0.1781	1131881
rs77702622	8	143367857	A	G	0.0614	-0.0213	0.0029	3.62e-13	4.5	0.3747	1122461
rs72771860	5	87974682	T	G	0.0686	-0.0211	0.0029	3.64e-13	28.6	0.0609	1.02975e+06
rs34748029	2	104060003	A	C	0.0876	0.0185	0.0025	3.72e-13	12.1	0.2297	1.07921e+06
rs61755388	7	126541317	T	C	0.7878	0.0125	0.0017	3.88e-13	0	0.7983	1.13188e+06
rs12503522	4	94543233	T	C	0.282	-0.0113	0.0016	3.93e-13	16.2	0.1286	1131881
rs9886703	9	82246351	A	T	0.1671	-0.0136	0.0019	4.46e-13	0	0.8982	1.12937e+06
rs72482130	2	237054356	T	C	0.8464	0.0141	0.0019	4.59e-13	8.7	0.2755	1.12781e+06
rs77025239	3	180734185	A	G	0.1559	-0.014	0.0019	4.65e-13	0	0.9599	1.12945e+06
rs2014830	3	50172397	T	C	0.3139	0.011	0.0015	4.72e-13	9.8	0.2521	1117396
rs111852224	18	25596884	T	C	0.1227	0.0156	0.0022	4.85e-13	19	0.0952	1.11593e+06
rs4384309	10	133110596	A	G	0.4641	0.0102	0.0014	4.89e-13	0	0.9545	1116832
rs7560871	2	145616899	A	G	0.0739	-0.0193	0.0027	5.24e-13	19.7	0.0809	1.13188e+06
rs12524795	6	3464074	T	C	0.4374	0.0102	0.0014	5.28e-13	0	0.8282	1.13017e+06
rs72622559	3	175672897	T	C	0.2301	-0.012	0.0017	5.5e-13	0	0.479	1.13017e+06
rs9386110	6	145626208	T	C	0.8917	-0.0163	0.0023	5.66e-13	11.2	0.2223	1.1289e+06
rs62179650	2	189135884	A	G	0.2995	0.0112	0.0016	5.66e-13	8	0.2899	1.09525e+06
rs6065784	20	43717435	C	G	0.6953	0.011	0.0015	5.78e-13	0	0.6962	1131881
rs4673840	2	215363241	T	C	0.842	-0.0138	0.0019	5.86e-13	25.1	0.032	1.13188e+06
rs56085180	7	2143594	A	G	0.0366	-0.0269	0.0037	5.94e-13	0	0.8436	1130649
rs2043187	18	50394405	A	G	0.384	0.0107	0.0015	5.94e-13	7.2	0.3172	1071454
rs1329044	9	23747791	T	C	0.8276	0.0134	0.0019	6.28e-13	0	0.5242	1.11818e+06
rs12750688	1	98757620	C	G	0.7406	0.0116	0.0016	6.64e-13	0	0.6439	1.1152e+06
rs3809634	16	53538157	A	G	0.6842	-0.0109	0.0015	6.82e-13	0	0.5264	1.11683e+06
rs62177359	2	161290337	A	C	0.9653	-0.0275	0.0038	6.87e-13	0	0.6629	1.12995e+06
rs75203411	2	100513153	T	C	0.1713	0.0135	0.0019	7.68e-13	0	0.6124	1.11013e+06
rs4877516	9	82442731	A	T	0.4417	-0.0101	0.0014	7.78e-13	0	0.7149	1.13108e+06
rs4899012	14	61003889	C	G	0.6019	-0.0103	0.0014	8.06e-13	0	0.9637	1.12861e+06
rs11100237	4	160477041	A	G	0.5242	-0.0101	0.0014	8.17e-13	4.1	0.3801	1.13188e+06
rs3768480	1	110530995	C	G	0.4523	0.0101	0.0014	8.4e-13	17.3	0.1171	1117085
rs4358358	4	30970822	A	G	0.6937	0.0109	0.0015	8.69e-13	0	0.5728	1.13188e+06
rs12774577	10	104959487	T	C	0.8545	0.0142	0.002	8.69e-13	5.8	0.3412	1.13108e+06
rs74545339	8	135440608	A	G	0.1142	-0.0158	0.0022	9.06e-13	0	0.5947	1131084
rs7430651	3	116582186	T	C	0.2863	-0.0111	0.0016	9.38e-13	0	0.4995	1131881
rs730384	14	74889870	A	G	0.4388	0.0101	0.0014	9.38e-13	15.6	0.138	1131881
rs34067381	3	123594419	T	G	0.3617	-0.0104	0.0015	9.77e-13	0	0.7009	1131337
rs969512	4	147872742	A	T	0.6596	-0.0106	0.0015	9.84e-13	0	0.4929	1.13188e+06
rs4497562	13	62612604	A	G	0.7295	0.0112	0.0016	1.05e-12	8.9	0.2709	1.13108e+06
rs6994287	8	9340932	A	G	0.4055	0.0102	0.0014	1.11e-12	21.1	0.0693	1128827
rs6760887	2	161859760	T	C	0.2447	0.0155	0.0022	1.17e-12	16.1	0.1456	637233
rs9888796	16	68297589	T	C	0.2625	0.0113	0.0016	1.2e-12	2.1	0.4286	1.12937e+06
rs11021432	11	95837674	A	T	0.3692	0.0103	0.0015	1.25e-12	41.1	0.0003	1130168
rs11703948	22	38817047	A	G	0.9026	-0.0168	0.0024	1.26e-12	1.3	0.4479	1127502
rs12682775	9	135490491	T	C	0.7754	-0.0119	0.0017	1.26e-12	13.1	0.1846	1.13108e+06
rs165633	22	29880773	A	G	0.7575	-0.0116	0.0016	1.27e-12	15.3	0.1482	1.12847e+06
rs10752262	10	12395100	T	C	0.4192	0.0102	0.0014	1.28e-12	21.5	0.0689	1.11101e+06
rs981230	5	59039858	T	C	0.4793	0.01	0.0014	1.28e-12	24.5	0.0368	1131084
rs77201694	1	44347087	A	G	0.1213	0.0156	0.0022	1.28e-12	23.2	0.064	1082325
rs56405138	4	166126745	A	T	0.1231	0.0153	0.0022	1.31e-12	0	0.8215	1.1135e+06
rs72636697	4	68016609	T	C	0.1551	-0.014	0.002	1.31e-12	2.8	0.4105	1095250
rs62340636	4	176940335	T	G	0.6254	0.0103	0.0014	1.47e-12	10.4	0.2368	1.13188e+06
rs995698	9	87997869	A	G	0.538	-0.0099	0.0014	1.53e-12	22	0.0577	1.13108e+06
rs62155873	2	105969362	T	C	0.1221	-0.0151	0.0021	1.65e-12	0	0.5427	1.13188e+06
rs114593137	1	241876565	A	T	0.793	-0.0122	0.0017	1.65e-12	0	0.6189	1.12945e+06
rs35929923	7	21400525	A	G	0.2495	-0.0114	0.0016	1.77e-12	0	0.481	1131881
rs891793	15	27256021	C	G	0.5403	-0.0099	0.0014	1.87e-12	17.6	0.1091	1128612
rs10204051	2	103775435	T	G	0.4055	-0.0101	0.0014	1.92e-12	0	0.6655	1123916
rs73648455	9	14077378	T	C	0.0797	-0.0183	0.0026	1.99e-12	4.1	0.3809	1.11854e+06
rs192436652	19	54960747	T	C	0.0268	-0.0319	0.0045	2.06e-12	28.5	0.0616	1.03646e+06
rs175325	20	22317310	A	T	0.5966	-0.01	0.0014	2.24e-12	27.6	0.0196	1130168
rs60096640	6	27636313	A	G	0.8926	0.0159	0.0023	2.24e-12	0	0.9158	1.13188e+06
rs12405889	1	235597252	T	G	0.489	-0.0098	0.0014	2.3e-12	0	0.8021	1131881
rs9929556	16	62193640	T	G	0.5688	-0.0099	0.0014	2.31e-12	27.8	0.019	1131084
rs17604349	16	72210865	A	G	0.1852	0.0127	0.0018	2.36e-12	0	0.5408	1.13108e+06
rs2216144	12	97666478	T	C	0.5306	0.0098	0.0014	2.58e-12	3.7	0.3892	1131881
rs56174996	1	91145181	A	G	0.1359	-0.0143	0.002	2.81e-12	0	0.5498	1.12861e+06
rs13197257	6	128333682	T	G	0.279	0.0109	0.0016	2.83e-12	0	0.6144	1.12773e+06
rs6969783	7	117593308	A	T	0.4705	-0.0098	0.0014	2.87e-12	14.5	0.1595	1.12962e+06
rs4846724	1	221967817	A	G	0.5347	0.0098	0.0014	2.89e-12	0	0.6236	1131881
rs356999	2	60811584	A	G	0.3802	-0.0101	0.0014	2.91e-12	8.9	0.2694	1131881
rs72677177	1	72120034	A	G	0.4017	0.01	0.0014	3.03e-12	4.5	0.3715	1129281
rs6573559	14	64923166	T	G	0.3152	0.0105	0.0015	3.11e-12	0	0.4937	1.13188e+06
rs12638072	3	65654480	A	G	0.2992	-0.0107	0.0015	3.13e-12	1.2	0.4498	1119342
rs9929993	16	7664875	T	C	0.361	-0.0102	0.0015	3.18e-12	3.1	0.4041	1.13188e+06
rs1245829	12	79648170	A	T	0.5814	-0.0099	0.0014	3.29e-12	6.5	0.3266	1.12448e+06
rs79798166	5	59152140	A	G	0.0884	0.0172	0.0025	3.63e-12	8.6	0.2807	1127676
rs3735478	7	44800176	T	G	0.2932	0.0108	0.0016	3.66e-12	19.6	0.0842	1117629
rs77719387	3	49917021	A	T	0.0174	-0.0403	0.0058	3.78e-12	0	0.5312	965119
rs118093058	11	62413673	T	G	0.133	0.0146	0.0021	3.78e-12	3	0.4103	1.09635e+06
rs59480703	8	9653130	C	G	0.1936	-0.0123	0.0018	3.97e-12	0	0.9611	1.12937e+06
rs4881269	10	4031519	A	G	0.3818	0.01	0.0014	3.97e-12	10.7	0.2305	1131881
rs8008382	14	104054425	T	C	0.3009	-0.0106	0.0015	4.07e-12	0	0.9143	1.13188e+06
rs7617204	3	160821969	A	G	0.5223	-0.0097	0.0014	4.33e-12	39.3	0.0006	1131337
rs1117152	12	15438032	T	G	0.701	0.0106	0.0015	4.47e-12	0.8	0.4575	1131881
rs7041702	9	33053430	A	G	0.7406	-0.0111	0.0016	4.53e-12	6.1	0.333	1.13108e+06
rs1434630	5	136557055	T	G	0.1479	-0.0137	0.002	4.63e-12	6.8	0.3176	1.13108e+06
rs4839155	1	112161489	T	G	0.7671	0.0115	0.0017	4.66e-12	6.6	0.3213	1.13188e+06
rs11687736	2	225405122	A	T	0.6764	-0.0105	0.0015	4.66e-12	0	0.5856	1095250
rs10145520	14	21930932	T	G	0.8031	-0.0122	0.0018	4.78e-12	11.4	0.2165	1.13188e+06
rs12613500	2	180928465	C	G	0.4238	0.0098	0.0014	4.82e-12	28.4	0.0158	1.13188e+06
rs711793	2	174175921	T	C	0.3474	0.0103	0.0015	5.01e-12	8.9	0.291	1.09891e+06
rs7910403	10	87039251	T	G	0.1952	0.0122	0.0018	5.08e-12	0	0.9275	1.13108e+06
rs12285074	11	116762028	A	G	0.1012	0.0161	0.0023	5.11e-12	11.4	0.2173	1.11934e+06
rs9267658	6	31845985	T	C	0.1428	0.0138	0.002	5.25e-12	22	0.0569	1.13026e+06
rs7040995	9	92226172	C	G	0.5324	0.0097	0.0014	5.39e-12	0	0.6419	1131084
rs35811586	2	233743794	T	C	0.0547	0.0217	0.0031	5.47e-12	0	0.9258	1086171
rs9373363	6	143150043	A	G	0.7485	-0.0111	0.0016	5.54e-12	0	0.7784	1131881
rs79994730	1	75562222	T	C	0.0426	0.024	0.0035	5.88e-12	10.9	0.2361	1.12082e+06
rs721579	17	43370481	T	C	0.2617	-0.011	0.0016	5.96e-12	8.7	0.276	1122967
rs12764593	10	107491895	C	G	0.0622	0.0202	0.0029	6e-12	0	0.6691	1.10889e+06
rs62420387	6	98404243	T	C	0.075	-0.0184	0.0027	6.16e-12	0	0.8779	1.11467e+06
rs74415461	16	89990843	T	C	0.0843	0.0176	0.0026	6.25e-12	18	0.1278	1.10326e+06
rs74747621	2	229061868	T	C	0.1124	0.0153	0.0022	6.29e-12	0	0.9243	1.13188e+06
rs7147473	14	30608538	A	G	0.6719	-0.0103	0.0015	6.33e-12	27.1	0.022	1130168
rs74091672	1	73978572	A	C	0.8881	-0.0153	0.0022	6.46e-12	0	0.5935	1.12455e+06
rs77554090	3	65711935	T	C	0.0731	-0.0186	0.0027	6.63e-12	0	0.4915	1.11845e+06
rs981883	5	57107989	A	G	0.3886	0.0099	0.0014	6.67e-12	0	0.6396	1131084
rs35104491	6	97390463	A	G	0.1849	0.0124	0.0018	6.81e-12	19.1	0.0876	1131881
rs10937240	3	185802823	T	C	0.1899	-0.0123	0.0018	6.95e-12	22.7	0.0502	1.13188e+06
rs56171318	18	35272539	T	C	0.1431	-0.0137	0.002	7.09e-12	22.5	0.0515	1.13188e+06
rs1637770	7	2190385	T	C	0.0683	0.0191	0.0028	7.32e-12	0	0.7524	1.12993e+06
rs13133213	4	15646794	A	G	0.498	0.0096	0.0014	7.57e-12	18.1	0.1011	1131881
rs6715321	2	100109001	T	C	0.4277	-0.0097	0.0014	7.62e-12	17	0.1189	1129624
rs7317761	13	100753796	C	G	0.7355	0.0109	0.0016	7.77e-12	16.3	0.1289	1.13108e+06
rs10773208	12	122970156	T	C	0.2526	-0.011	0.0016	8.09e-12	20	0.0772	1.13188e+06
rs4741571	9	1667814	A	G	0.6723	-0.0102	0.0015	8.09e-12	25	0.0336	1130168
rs6917204	6	145284716	T	C	0.7951	0.0119	0.0017	8.14e-12	21.9	0.0579	1.13017e+06
rs6743032	2	126024787	A	G	0.0926	-0.0165	0.0024	8.36e-12	0	0.7452	1.13188e+06
rs17190418	13	58746132	T	C	0.0537	-0.0213	0.0031	8.42e-12	3.6	0.3948	1.12676e+06
rs13145650	4	122963344	T	C	0.917	-0.0173	0.0025	8.99e-12	19.9	0.0785	1.13188e+06
rs1718188	12	121343893	A	T	0.4365	0.0096	0.0014	9.05e-12	16.3	0.1273	1131881
rs1671770	12	120946568	A	C	0.1786	0.0125	0.0018	9.23e-12	22.7	0.0501	1.13188e+06
rs117005905	6	114218608	T	C	0.1143	0.015	0.0022	9.35e-12	0	0.7262	1.13017e+06
rs12888615	14	72435705	T	C	0.1991	0.012	0.0018	9.42e-12	0	0.5442	1130967
rs1842713	17	33200385	A	G	0.7882	-0.0117	0.0017	9.67e-12	25.6	0.0288	1131881
rs3859523	19	32972296	T	C	0.8208	0.0124	0.0018	9.92e-12	2.7	0.4144	1131881
rs1335482	1	78603463	T	C	0.5295	0.0096	0.0014	1.01e-11	0	0.4793	1131881
rs9929762	16	78169675	A	G	0.5595	0.0096	0.0014	1.03e-11	0	0.7978	1131084
rs2283076	7	126478190	A	G	0.7786	0.0115	0.0017	1.05e-11	0	0.9575	1.13188e+06
rs62142891	2	51539113	A	G	0.2632	0.0108	0.0016	1.05e-11	0	0.5659	1.13017e+06
rs7625428	3	56570907	T	C	0.6036	0.0098	0.0014	1.07e-11	0	0.6494	1129448
rs4298514	8	118932887	T	C	0.6986	0.0104	0.0015	1.07e-11	0	0.8297	1131084
rs13099165	3	168740425	T	G	0.2029	-0.0118	0.0017	1.09e-11	0	0.6516	1.13134e+06
rs2447097	17	2278064	T	G	0.4596	0.0096	0.0014	1.1e-11	0	0.7877	1.12822e+06
rs117799466	15	34659517	C	G	0.3619	0.0106	0.0016	1.19e-11	0	0.5569	993902
rs902820	8	143099872	A	T	0.4224	-0.0096	0.0014	1.28e-11	35.1	0.003	1126417
rs4358081	2	29100642	A	C	0.5285	-0.0095	0.0014	1.28e-11	0	0.7728	1.13188e+06
rs12967010	18	9645035	T	C	0.7746	0.0114	0.0017	1.33e-11	14.7	0.1558	1.13017e+06
rs75033012	11	61347033	C	G	0.0391	-0.0258	0.0038	1.38e-11	25.4	0.1011	1.0209e+06
rs1426619	10	90091540	T	C	0.4346	0.0096	0.0014	1.4e-11	0	0.5042	1.13108e+06
rs7928017	11	113448762	A	C	0.4341	0.0096	0.0014	1.43e-11	5.9	0.3386	1.12945e+06
rs6534338	4	123026869	T	C	0.3034	0.0103	0.0015	1.46e-11	0	0.8541	1131337
rs11732160	4	67070824	A	G	0.7154	0.0105	0.0016	1.46e-11	17.8	0.1046	1131881
rs137858393	1	96454977	A	G	0.9341	0.0193	0.0029	1.55e-11	7.8	0.3028	1.10782e+06
rs2761438	1	110752139	A	G	0.3807	0.0098	0.0015	1.59e-11	21.4	0.0659	1115683
rs17742342	2	148633936	A	C	0.802	-0.0119	0.0018	1.59e-11	0	0.7597	1131881
rs2470966	7	104430889	C	G	0.6998	-0.0103	0.0015	1.62e-11	11.7	0.2096	1131881
rs7167688	15	26813137	T	C	0.4917	-0.0094	0.0014	1.71e-11	0	0.8741	1131881
rs401966	7	101695817	C	G	0.39	-0.0097	0.0014	1.72e-11	0	0.7562	1.13017e+06
rs7803932	7	70203673	A	G	0.1667	0.0127	0.0019	1.74e-11	0	0.7465	1.13188e+06
rs3751331	12	58290278	A	G	0.3797	-0.0097	0.0014	1.75e-11	0	0.6869	1.12962e+06
rs12453682	17	37770005	T	C	0.6947	0.0102	0.0015	1.81e-11	0	0.6644	1130450
rs2220926	18	58943386	T	C	0.4308	-0.0095	0.0014	1.84e-11	0	0.7641	1.13188e+06
rs4469771	10	68192714	T	C	0.6802	0.0101	0.0015	1.88e-11	0	0.5767	1125552
rs1792602	11	90439633	A	G	0.3824	-0.0097	0.0014	1.9e-11	0	0.8276	1131881
rs482787	10	99767024	T	C	0.6749	0.01	0.0015	1.95e-11	0	0.6048	1131084
rs34780702	1	197907554	A	G	0.7635	0.0111	0.0017	2.05e-11	17.3	0.1117	1.13188e+06
rs79728014	11	46062245	A	G	0.8553	-0.0134	0.002	2.06e-11	7.7	0.2949	1.13188e+06
rs9536462	13	54124650	A	G	0.1454	0.0133	0.002	2.1e-11	0	0.7534	1.13108e+06
rs12694681	2	226609241	T	G	0.6883	0.0102	0.0015	2.13e-11	0	0.7008	1.12773e+06
rs341504	13	60421219	A	T	0.362	0.0099	0.0015	2.22e-11	0	0.7072	1.09274e+06
rs140711597	3	48469441	C	G	0.9818	0.0366	0.0055	2.23e-11	0	0.5756	1.03973e+06
rs7016302	8	4833041	C	G	0.8308	-0.0125	0.0019	2.26e-11	12.5	0.1944	1.13188e+06
rs11652522	17	43055579	A	C	0.1045	-0.0154	0.0023	2.29e-11	10.7	0.2361	1125752
rs11138947	9	72110562	T	C	0.7236	0.0105	0.0016	2.36e-11	20	0.0781	1131084
rs7597126	2	215009358	T	C	0.4915	-0.0094	0.0014	2.46e-11	0	0.7893	1.11539e+06
rs590013	1	29155738	T	C	0.6772	0.01	0.0015	2.47e-11	0	0.6018	1131881
rs4766424	12	1954096	C	G	0.1237	0.0142	0.0021	2.47e-11	0	0.749	1130168
rs312927	19	3274770	A	G	0.1203	-0.0147	0.0022	2.52e-11	29.8	0.0237	1079187
rs2160514	12	16756508	A	C	0.5548	-0.0094	0.0014	2.54e-11	11.2	0.2206	1131881
rs1035578	16	12531365	A	G	0.5272	-0.0094	0.0014	2.57e-11	20.6	0.0702	1.13188e+06
rs76077165	2	162893338	A	C	0.0898	0.0165	0.0025	2.62e-11	0	0.7722	1109318
rs2529069	7	24571038	T	C	0.7343	-0.0106	0.0016	2.66e-11	31.4	0.0074	1131881
rs78193153	7	71720681	A	G	0.0647	0.0191	0.0029	2.76e-11	0	0.534	1117620
rs58859557	1	44010456	T	C	0.0702	0.0187	0.0028	2.82e-11	2	0.4335	1.08007e+06
rs62109862	19	13011809	A	G	0.1418	0.0136	0.002	2.85e-11	26.8	0.0325	1097867
rs5754762	22	34329224	A	G	0.9405	0.0197	0.003	2.95e-11	5.8	0.3411	1.13017e+06
rs4328757	3	36938180	T	C	0.6119	0.0096	0.0014	2.95e-11	9.9	0.2491	1.12962e+06
rs7127580	11	79144856	C	G	0.8925	-0.015	0.0023	3.12e-11	0	0.8248	1.13188e+06
rs6123924	20	58219764	A	G	0.8445	0.0129	0.0019	3.2e-11	0	0.9878	1.13017e+06
rs12790196	11	57497847	T	C	0.3263	-0.0101	0.0015	3.29e-11	0	0.98	1.09525e+06
rs34807077	8	28680769	A	C	0.1569	0.0128	0.0019	3.29e-11	0	0.9392	1.12865e+06
rs9527662	13	58020265	A	T	0.4193	0.0094	0.0014	3.37e-11	11.4	0.2191	1129371
rs2852349	18	37182907	T	C	0.5278	-0.0093	0.0014	3.78e-11	0	0.7665	1131881
rs9545395	13	36370970	T	C	0.8702	0.0138	0.0021	3.81e-11	13.4	0.1774	1.13108e+06
rs12151248	19	13212025	T	C	0.1141	-0.0149	0.0023	3.81e-11	21.8	0.0799	1087074
rs35606437	8	93327532	A	G	0.2675	0.0105	0.0016	3.98e-11	2.3	0.423	1.13108e+06
rs1865955	10	118837990	T	C	0.8244	0.0122	0.0019	4.06e-11	0	0.9845	1.11854e+06
rs9527905	13	59403033	A	G	0.5828	-0.0094	0.0014	4.11e-11	0	0.9458	1129371
rs4652135	1	175837673	A	C	0.7201	0.0103	0.0016	4.35e-11	4.2	0.3788	1128340
rs74944275	5	102726073	T	C	0.0433	0.0231	0.0035	4.44e-11	7.7	0.3109	1095848
rs114952970	2	161812352	T	C	0.0325	0.0265	0.004	4.44e-11	24.7	0.0522	1093363
rs13327482	3	196788363	A	G	0.8221	-0.0121	0.0018	4.47e-11	0	0.5182	1.13188e+06
rs4675248	2	202880230	A	G	0.3995	-0.0094	0.0014	4.5e-11	3.4	0.3966	1131881
rs2964199	5	57532775	T	C	0.3149	-0.0099	0.0015	4.61e-11	16.4	0.1293	1.13054e+06
rs9830359	3	85397118	T	C	0.1117	-0.0147	0.0022	4.7e-11	20.2	0.0754	1.12945e+06
rs12126231	1	184698816	A	G	0.6094	0.0095	0.0014	4.82e-11	0	0.9387	1131881
rs6812533	4	39687838	T	C	0.7444	0.0106	0.0016	4.85e-11	0	0.4802	1.11934e+06
rs4778058	15	93456069	T	C	0.4964	-0.0092	0.0014	4.92e-11	14	0.1701	1.12742e+06
rs1171040	1	190400984	A	G	0.7866	-0.0113	0.0017	5.07e-11	0	0.8393	1.11934e+06
rs6924023	6	170076041	A	G	0.7548	0.0107	0.0016	5.17e-11	2.2	0.4266	1.13017e+06
rs7799141	7	132660489	A	G	0.3104	0.0099	0.0015	5.31e-11	0	0.8443	1131881
rs10830858	11	91896638	T	C	0.5104	0.0092	0.0014	5.31e-11	0	0.5121	1131881
rs4895650	6	145024122	T	C	0.5472	0.0093	0.0014	5.31e-11	0	0.9849	1117629
rs13015496	2	226290705	C	G	0.1842	0.0119	0.0018	5.34e-11	2.5	0.4185	1.13188e+06
rs67456868	6	119079800	A	G	0.1839	0.0119	0.0018	5.37e-11	0	0.6046	1.13188e+06
rs11623285	14	24557642	T	G	0.863	-0.0135	0.0021	5.58e-11	13.2	0.1959	1.10515e+06
rs4369924	20	41954383	A	G	0.1615	0.0125	0.0019	5.58e-11	0	0.7872	1.13017e+06
rs2431023	15	57553832	A	T	0.4151	0.0093	0.0014	5.76e-11	5.7	0.3424	1.13108e+06
rs10783243	12	48653003	A	G	0.5228	-0.0092	0.0014	5.8e-11	0	0.6647	1131881
rs9771228	7	32322496	T	C	0.6491	0.0096	0.0015	5.91e-11	31.3	0.0078	1.13188e+06
rs12670376	7	48823154	A	G	0.4464	0.0092	0.0014	5.99e-11	9.2	0.2627	1131881
rs9927842	16	15153717	T	C	0.149	-0.013	0.002	6.22e-11	0	0.9295	1112025
rs1991585	2	16647170	T	C	0.706	-0.0101	0.0015	6.26e-11	14	0.1657	1131881
rs252991	5	106767346	A	G	0.3695	0.0095	0.0015	6.3e-11	0	0.6414	1.13108e+06
rs6672986	1	174076864	C	G	0.4478	0.0094	0.0014	6.42e-11	1.3	0.446	1.08271e+06
rs12789313	11	25058937	T	C	0.4907	0.0092	0.0014	6.79e-11	4.5	0.3698	1131881
rs11158800	14	69747046	A	G	0.5044	-0.0091	0.0014	7.15e-11	0	0.7993	1130168
rs12477385	2	166144850	T	G	0.2264	0.0109	0.0017	7.15e-11	9.1	0.265	1.13188e+06
rs67224963	5	63787810	A	G	0.2052	0.0113	0.0017	7.19e-11	2.2	0.4257	1.12937e+06
rs913509	9	134737751	A	G	0.656	0.0096	0.0015	7.42e-11	2.4	0.4211	1.12937e+06
rs939400	2	50645890	T	G	0.3685	-0.0095	0.0015	7.52e-11	0	0.7864	1130061
rs6435326	2	207002559	A	T	0.5148	-0.0091	0.0014	7.56e-11	23.7	0.0427	1130168
rs139244147	7	111912738	A	G	0.0604	-0.0193	0.003	7.71e-11	0	0.7196	1.10877e+06
rs4851263	2	100801867	A	G	0.103	-0.0151	0.0023	7.86e-11	0	0.519	1119342
rs743316	21	35252696	T	C	0.7915	0.0112	0.0017	8.21e-11	12.7	0.1912	1.13108e+06
rs7321274	13	69146186	A	G	0.7999	0.0114	0.0018	8.21e-11	13.3	0.1808	1131084
rs1329125	1	234740880	T	C	0.3273	-0.0097	0.0015	8.37e-11	13.6	0.1775	1.12566e+06
rs118040169	19	13109531	A	G	0.965	-0.0248	0.0038	8.47e-11	0	0.6801	1.12831e+06
rs13246220	7	39324253	T	G	0.6117	-0.0093	0.0014	8.53e-11	12.4	0.1961	1.13188e+06
rs4941735	13	31641248	T	C	0.5703	0.0092	0.0014	8.63e-11	0	0.8492	1131881
rs17680712	8	87300775	T	C	0.4369	-0.0092	0.0014	8.63e-11	0	0.6562	1130540
rs57349798	6	37486052	A	G	0.4094	0.0093	0.0014	8.63e-11	6.8	0.3176	1.13017e+06
rs17144467	7	122098782	A	C	0.6867	0.0098	0.0015	8.74e-11	1	0.4544	1.13188e+06
rs2297293	21	47125046	C	G	0.3141	0.0099	0.0015	8.8e-11	0	0.578	1116003
rs74787922	2	141598681	A	C	0.9333	0.0182	0.0028	8.97e-11	25.8	0.0296	1130186
rs1050847	16	87443734	T	C	0.5626	0.0092	0.0014	9.2e-11	0	0.8144	1.12743e+06
rs12620796	2	51287849	A	C	0.5496	0.0121	0.0019	9.25e-11	0	0.913	644499
rs72902523	18	36565421	T	C	0.2594	-0.0103	0.0016	9.85e-11	24.5	0.0358	1.13188e+06
rs1106090	2	58068741	A	G	0.6228	0.0094	0.0014	1e-10	24.5	0.0363	1131881
rs12891042	14	34018986	T	C	0.5853	0.0092	0.0014	1.02e-10	12.7	0.1917	1.13017e+06
rs10098073	8	143309504	A	C	0.4775	-0.0091	0.0014	1.03e-10	16.5	0.1286	1127425
rs13010566	2	125873208	A	C	0.4718	-0.0091	0.0014	1.03e-10	8.9	0.2696	1.13188e+06
rs2336721	3	53028375	T	C	0.3778	0.0095	0.0015	1.05e-10	0	0.9157	1093537
rs1007731	14	37054590	A	C	0.1159	-0.0143	0.0022	1.05e-10	10.8	0.2415	1.10497e+06
rs10042828	5	88308777	A	G	0.8885	-0.0145	0.0022	1.06e-10	2.7	0.4143	1118545
rs2434672	5	11471879	A	C	0.5321	0.0091	0.0014	1.06e-10	7.3	0.307	1129371
rs6881581	5	140946355	A	G	0.3278	-0.0096	0.0015	1.08e-10	0	0.5829	1.13108e+06
rs72792395	2	44886144	T	C	0.1093	-0.0145	0.0022	1.09e-10	15	0.1491	1131881
rs10750539	11	133548873	A	G	0.3517	-0.0095	0.0015	1.11e-10	15.1	0.1519	1.12768e+06
rs1485300	8	120082253	C	G	0.6682	0.0098	0.0015	1.14e-10	0	0.6639	1092740
rs9388490	6	126704795	T	C	0.4437	0.0091	0.0014	1.15e-10	0	0.7989	1130168
rs12519073	5	136776762	T	C	0.2317	-0.0107	0.0017	1.16e-10	0	0.597	1.13108e+06
rs12912465	15	77309459	T	C	0.269	-0.0104	0.0016	1.17e-10	13.4	0.1991	1.08749e+06
rs76552497	8	12679680	T	C	0.1704	-0.012	0.0019	1.17e-10	0	0.8197	1131084
rs6573552	14	64750233	T	C	0.496	-0.009	0.0014	1.17e-10	0	0.548	1.13188e+06
rs1717204	3	118461145	A	C	0.1818	-0.0117	0.0018	1.2e-10	9.6	0.2568	1.12835e+06
rs11693885	2	60122046	A	G	0.4522	-0.0091	0.0014	1.22e-10	0	0.7088	1130168
rs7012546	8	105067737	T	C	0.4166	0.0092	0.0014	1.25e-10	0	0.7141	1129371
rs2665668	2	60768978	A	G	0.6413	-0.0094	0.0015	1.25e-10	0	0.6719	1126040
rs1301838	11	99670514	T	C	0.3227	-0.0096	0.0015	1.29e-10	11.5	0.2132	1.13188e+06
rs62256284	3	70526305	T	C	0.2093	0.0111	0.0017	1.32e-10	28.4	0.0163	1130168
rs198262	14	57283283	T	C	0.9574	-0.0223	0.0035	1.32e-10	0	0.7952	1.13134e+06
rs2212430	11	109289538	T	C	0.3038	-0.01	0.0016	1.32e-10	0	0.6943	1093537
rs13029602	2	29574875	T	C	0.6059	-0.0092	0.0014	1.33e-10	0	0.9091	1.13188e+06
rs7692359	4	83209346	T	C	0.7786	-0.0109	0.0017	1.4e-10	16.8	0.1228	1116909
rs1738050	1	44707295	C	G	0.6197	-0.0093	0.0014	1.42e-10	24	0.0396	1131881
rs17110109	12	54668908	T	C	0.6163	-0.0093	0.0014	1.47e-10	16.9	0.1211	1.1269e+06
rs11789013	9	109677417	T	C	0.7585	0.0106	0.0016	1.47e-10	13.4	0.1817	1.11683e+06
rs12438177	15	55951432	A	G	0.3676	0.0093	0.0015	1.48e-10	14.3	0.1622	1131084
rs1527878	2	183446535	A	G	0.7566	-0.0105	0.0016	1.49e-10	0	0.5553	1.13188e+06
rs7190	18	5889765	A	G	0.3514	-0.0095	0.0015	1.5e-10	22.3	0.0682	1101567
rs9359939	6	92133241	A	C	0.2431	-0.0105	0.0016	1.51e-10	0	0.8273	1.13188e+06
rs4480339	1	91096799	A	C	0.6926	-0.0097	0.0015	1.53e-10	0	0.6754	1130168
rs2029401	5	92891029	A	G	0.4278	-0.0091	0.0014	1.53e-10	0	0.4926	1118545
rs111821073	9	99084793	T	C	0.1567	0.0124	0.0019	1.58e-10	0	0.5423	1.11611e+06
rs72486027	11	107167486	T	C	0.2459	-0.0104	0.0016	1.61e-10	0	0.5483	1.12999e+06
rs2368831	12	188285	T	C	0.5736	-0.0092	0.0014	1.63e-10	14.2	0.1834	1097812
rs62155350	2	98932980	A	G	0.0186	0.0338	0.0053	1.69e-10	28.4	0.0344	1.09045e+06
rs10772644	12	13417617	C	G	0.8887	0.0142	0.0022	1.69e-10	0	0.6308	1.13188e+06
rs56794817	17	60001978	A	G	0.1615	0.0122	0.0019	1.69e-10	2.3	0.4227	1.12619e+06
rs112806496	2	80421805	C	G	0.9129	-0.016	0.0025	1.72e-10	0	0.4926	1.1152e+06
rs12431682	14	101539999	T	C	0.3699	-0.0093	0.0015	1.73e-10	0	0.5745	1125386
rs17747544	20	41211913	A	G	0.4701	-0.009	0.0014	1.74e-10	18.9	0.0899	1131881
rs7772172	6	16662928	A	G	0.4009	0.0091	0.0014	1.74e-10	22.1	0.056	1131337
rs6861925	5	176324729	C	G	0.4902	-0.009	0.0014	1.76e-10	11.7	0.212	1.13108e+06
rs7552964	1	69331299	A	T	0.1013	0.0148	0.0023	1.78e-10	14	0.1666	1.13188e+06
rs9924031	16	19267144	C	G	0.3828	0.0093	0.0015	1.81e-10	0	0.5376	1.11182e+06
rs9540718	13	66920915	A	T	0.4893	-0.0089	0.0014	1.88e-10	0	0.87	1.13108e+06
rs4812697	20	41975395	T	G	0.9248	0.0171	0.0027	1.88e-10	17.3	0.1189	1.11593e+06
rs13130765	4	45163333	C	G	0.4721	-0.0091	0.0014	1.89e-10	0	0.8121	1105636
rs4925109	17	17661802	A	G	0.3172	-0.0096	0.0015	1.91e-10	27.6	0.0206	1.12939e+06
rs7914674	10	106738675	T	C	0.7832	-0.0139	0.0022	1.94e-10	11	0.2266	688901
rs6472208	8	66474730	T	C	0.4033	-0.0091	0.0014	2e-10	0	0.5851	1.13108e+06
rs73191311	8	4796094	A	G	0.3363	-0.0094	0.0015	2.03e-10	0	0.5827	1131881
rs4705763	5	112394503	C	G	0.5358	0.0089	0.0014	2.08e-10	13.4	0.1774	1131084
rs11894424	2	80588091	A	C	0.9524	0.0209	0.0033	2.14e-10	6.6	0.3201	1131881
rs1603460	12	23092626	T	G	0.4206	0.009	0.0014	2.2e-10	0	0.7942	1.13017e+06
rs66671632	8	143680772	T	C	0.1299	-0.0133	0.0021	2.24e-10	21.7	0.0641	1.1247e+06
rs567003	7	105341608	A	G	0.3538	0.0094	0.0015	2.27e-10	0	0.5823	1.11934e+06
rs2942884	2	101323578	A	G	0.4639	-0.009	0.0014	2.27e-10	42.2	0.0002	1.12333e+06
rs17133297	7	3455401	A	T	0.8958	-0.0146	0.0023	2.28e-10	12.6	0.1929	1.12945e+06
rs4731413	7	127836132	A	G	0.2058	0.0111	0.0017	2.31e-10	0	0.7636	1114360
rs13425585	2	157487273	C	G	0.5084	-0.0089	0.0014	2.32e-10	17.4	0.1119	1.13017e+06
rs1123285	14	57274519	C	G	0.6659	-0.0094	0.0015	2.38e-10	0	0.5714	1.13017e+06
rs62194170	2	161866504	A	G	0.2025	0.0111	0.0017	2.41e-10	0	0.9159	1129281
rs1734370	2	10978710	A	G	0.7171	0.0099	0.0016	2.42e-10	21.4	0.0617	1.13188e+06
rs11174399	12	62646556	A	G	0.2008	0.0111	0.0018	2.42e-10	0	0.9953	1.13188e+06
rs72667460	1	66536012	T	C	0.0539	0.0197	0.0031	2.44e-10	14.3	0.1659	1.1281e+06
rs75500877	1	181596751	T	C	0.0485	0.0207	0.0033	2.48e-10	3.7	0.3889	1.13188e+06
rs9849884	3	68869923	A	T	0.5836	-0.009	0.0014	2.51e-10	0	0.5294	1.13134e+06
rs112210983	16	14674204	A	G	0.2308	0.0105	0.0017	2.66e-10	3.1	0.4055	1.12951e+06
rs57437407	3	86173623	A	G	0.89	-0.0145	0.0023	2.67e-10	0	0.6026	1.0829e+06
rs42210	5	166408788	C	G	0.7122	-0.0098	0.0016	2.74e-10	0	0.5922	1116832
rs1952183	14	89844111	A	G	0.5078	-0.0089	0.0014	2.76e-10	0	0.6237	1.13017e+06
rs7650602	3	141147414	T	C	0.5599	-0.0089	0.0014	2.77e-10	22.3	0.0541	1130168
rs4434676	9	73032476	A	T	0.4292	-0.0089	0.0014	2.83e-10	0	0.6433	1.13108e+06
rs142747148	13	58271461	A	G	0.9811	0.0329	0.0052	2.84e-10	6	0.3471	1.10252e+06
rs34262657	15	63849287	T	G	0.9619	-0.024	0.0038	2.84e-10	0	0.9152	1.04908e+06
rs7451726	6	28382494	A	G	0.7947	0.0109	0.0017	2.86e-10	0.1	0.474	1131881
rs116656374	3	49413266	T	G	0.0373	-0.0242	0.0038	2.95e-10	22.6	0.0952	1.04861e+06
rs7356536	5	87083961	T	C	0.8647	-0.0129	0.0021	2.95e-10	20.3	0.0762	1130540
rs10009513	4	38591860	A	G	0.483	0.0088	0.0014	3.02e-10	24.9	0.0336	1131881
rs1918394	3	74903904	T	C	0.1658	0.0119	0.0019	3.04e-10	0	0.8778	1.13188e+06
rs137079	22	42977907	T	C	0.1375	0.0128	0.002	3.06e-10	0	0.8005	1.12994e+06
rs13261773	8	120187090	C	G	0.1602	0.0122	0.0019	3.12e-10	0	0.6736	1.09445e+06
rs80257979	12	49402562	T	G	0.9677	-0.0252	0.004	3.31e-10	8.8	0.2814	1.10962e+06
rs9977825	21	46494995	T	C	0.3655	-0.0092	0.0015	3.37e-10	23.3	0.0515	1.11957e+06
rs34286836	6	148273664	T	C	0.4479	-0.0089	0.0014	3.44e-10	13.7	0.1711	1.13188e+06
rs187580	5	102627355	T	G	0.7671	-0.0104	0.0017	3.56e-10	0	0.8206	1.13108e+06
rs182355396	3	50920457	A	C	0.0084	-0.0525	0.0084	3.67e-10	0	0.6958	952069
rs10205057	2	186139826	T	C	0.5619	0.009	0.0014	3.67e-10	5	0.3598	1095250
rs12810587	12	122675576	T	C	0.3256	0.0094	0.0015	3.7e-10	16.8	0.1228	1127735
rs32940	5	141132286	T	C	0.3001	-0.0096	0.0015	3.72e-10	0	0.7063	1.12937e+06
rs61739710	21	34925689	A	G	0.2813	-0.0099	0.0016	3.74e-10	15.2	0.1487	1094453
rs3111251	1	211409844	T	C	0.4325	-0.009	0.0014	3.88e-10	14.9	0.1527	1.09354e+06
rs2365376	5	88740323	A	C	0.3503	0.0092	0.0015	3.93e-10	10.6	0.2358	1129371
rs3948495	2	57383133	T	G	0.4079	-0.0089	0.0014	3.95e-10	27.1	0.0211	1.13188e+06
rs13281564	8	119483316	A	G	0.5129	0.0088	0.0014	4.02e-10	1.4	0.4449	1.12811e+06
rs12325727	17	47028472	A	G	0.4756	0.0088	0.0014	4.1e-10	0	0.5328	1.11763e+06
rs17113730	12	74936526	A	G	0.0717	-0.017	0.0027	4.1e-10	0	0.6816	1131881
rs4663617	2	236744626	A	T	0.235	0.0104	0.0017	4.12e-10	0	0.9551	1.12694e+06
rs10974256	9	3952892	A	G	0.3411	-0.0093	0.0015	4.12e-10	20.4	0.0747	1.11763e+06
rs11130380	3	53758950	T	G	0.6135	0.009	0.0014	4.17e-10	0	0.5403	1.13017e+06
rs2254681	1	159248048	A	G	0.2517	0.0101	0.0016	4.25e-10	0	0.6718	1.13188e+06
rs2980813	8	40050010	A	T	0.4692	0.0088	0.0014	4.28e-10	0	0.9352	1.12957e+06
rs10761202	9	96019970	T	C	0.4946	0.0088	0.0014	4.28e-10	12.1	0.204	1131084
rs2702576	4	15058245	A	G	0.3829	-0.009	0.0014	4.41e-10	10.5	0.2338	1.13188e+06
rs17622379	17	50726846	T	C	0.1853	-0.0113	0.0018	4.52e-10	0	0.5301	1131881
rs76235882	9	121096681	A	G	0.966	0.0241	0.0039	4.52e-10	20.1	0.0808	1.12985e+06
rs117468730	16	10205467	A	G	0.0205	-0.031	0.005	4.57e-10	23.3	0.0531	1.12239e+06
rs11030102	11	27681596	C	G	0.7479	0.0101	0.0016	4.6e-10	12	0.203	1.13188e+06
rs2885198	3	143636421	A	G	0.5318	0.0088	0.0014	4.63e-10	0	0.4893	1130168
rs6738860	2	22442099	A	T	0.4574	-0.0088	0.0014	4.65e-10	18.8	0.0924	1126191
rs580652	11	84904742	T	C	0.9017	-0.0147	0.0024	4.65e-10	0	0.6347	1.12774e+06
rs9820604	3	72363674	T	C	0.8254	0.0115	0.0018	4.8e-10	0	0.7925	1.13017e+06
rs806816	10	32285942	A	T	0.7498	0.0101	0.0016	4.8e-10	0	0.8767	1.13108e+06
rs62092949	18	48779673	T	C	0.4856	-0.0087	0.0014	4.86e-10	7.5	0.3025	1.13017e+06
rs2023016	6	162981266	C	G	0.7899	0.0107	0.0017	4.91e-10	0	0.6115	1.13188e+06
rs481940	1	71442457	T	C	0.2546	0.01	0.0016	4.94e-10	9.9	0.2461	1.13188e+06
rs72694479	14	85112638	T	G	0.1412	0.0127	0.002	4.94e-10	0	0.6649	1.09262e+06
rs10844179	12	32469601	A	G	0.2257	0.0104	0.0017	5.03e-10	11.6	0.2121	1.13188e+06
rs9858921	3	161148946	A	G	0.4661	-0.0087	0.0014	5.19e-10	0	0.6281	1130168
rs1391513	1	216693263	T	C	0.6911	-0.0095	0.0015	5.25e-10	7.7	0.3014	1.12447e+06
rs11023764	11	15910939	A	G	0.6418	0.0091	0.0015	5.32e-10	9.4	0.2618	1115196
rs13296345	9	14791348	T	C	0.6299	0.009	0.0015	5.35e-10	1.4	0.4448	1131084
rs11003463	10	51801793	T	G	0.6114	0.0091	0.0015	5.58e-10	0	0.8892	1.08865e+06
rs1408284	6	93893586	C	G	0.8639	-0.0127	0.002	5.71e-10	0	0.6211	1.13188e+06
rs4458044	17	43873727	C	G	0.2581	0.0101	0.0016	5.71e-10	11.3	0.2445	1.09687e+06
rs78440611	12	123144189	A	G	0.9026	-0.0147	0.0024	5.71e-10	9.2	0.262	1.13188e+06
rs139980871	18	36648364	T	C	0.0633	0.018	0.0029	5.78e-10	8.1	0.2937	1.11048e+06
rs76876592	13	67141932	A	G	0.8609	0.0126	0.002	5.82e-10	0	0.9107	1.12937e+06
rs1933264	6	153391618	T	C	0.7491	0.01	0.0016	5.85e-10	5.2	0.3534	1.13188e+06
rs7035315	9	83231511	A	G	0.6292	-0.009	0.0015	5.85e-10	0	0.8314	1131084
rs7495033	15	75206225	A	T	0.689	0.0095	0.0015	5.92e-10	0	0.6413	1092740
rs145018899	2	172616423	A	G	0.2977	0.0095	0.0015	6e-10	0	0.6579	1.13017e+06
rs4423373	15	27988340	A	G	0.5386	-0.0087	0.0014	6e-10	3	0.4062	1131881
rs17131123	1	91126097	A	G	0.9659	-0.0243	0.0039	6.29e-10	6.6	0.3365	1.08945e+06
rs12359372	10	67767951	T	C	0.6624	-0.0092	0.0015	6.33e-10	26	0.0287	1.12937e+06
rs763553	8	31445496	A	G	0.4452	0.0087	0.0014	6.41e-10	5.7	0.3439	1131084
rs72906124	2	157076201	T	C	0.942	0.0185	0.003	6.44e-10	6.1	0.3346	1.13134e+06
rs6956283	7	98756597	T	C	0.7342	0.0098	0.0016	6.44e-10	0	0.968	1.13188e+06
rs76241605	4	140717160	A	G	0.1142	0.0139	0.0022	6.48e-10	0	0.7857	1.08967e+06
rs76246107	19	50121274	A	G	0.0941	-0.0162	0.0026	6.52e-10	41.1	0.0293	953759
rs9513754	13	101043420	T	C	0.2906	0.0096	0.0016	6.64e-10	0	0.5568	1113037
rs255053	16	68020492	A	G	0.1913	-0.0111	0.0018	6.68e-10	0	0.5699	1118545
rs8016504	14	33308021	A	C	0.5427	-0.0087	0.0014	6.84e-10	0	0.7745	1125985
rs62155770	2	99981222	A	G	0.9474	-0.0196	0.0032	6.88e-10	0	0.5841	1.10253e+06
rs62090515	18	42671636	A	G	0.3605	-0.009	0.0015	6.88e-10	0	0.7349	1131881
rs151381	4	103118768	T	C	0.4927	-0.0087	0.0014	7.01e-10	16.2	0.1339	1117085
rs10080647	6	114742335	A	C	0.1405	0.0124	0.002	7.05e-10	17.1	0.1153	1.13188e+06
rs1408430	20	14917048	C	G	0.7193	0.0096	0.0016	7.09e-10	13	0.1854	1.13134e+06
rs232496	21	22734409	T	C	0.3657	0.009	0.0015	7.14e-10	0	0.6187	1131881
rs10519504	4	140640283	T	G	0.1561	0.0119	0.0019	7.31e-10	0	0.6419	1.13188e+06
rs236318	1	94050221	C	G	0.2346	-0.0102	0.0017	7.4e-10	7.7	0.2974	1.12774e+06
rs1267062	2	162000266	C	G	0.1781	0.0113	0.0018	7.4e-10	14.6	0.1552	1.13188e+06
rs1671269	18	50109971	T	C	0.7524	-0.01	0.0016	7.4e-10	0	0.7852	1.13188e+06
rs13381557	18	44513371	A	G	0.5413	-0.0087	0.0014	7.4e-10	0	0.81	1130168
rs68145588	17	75864805	T	G	0.1395	-0.0127	0.0021	7.53e-10	0	0.5995	1.08863e+06
rs7171405	15	61466893	A	G	0.2432	-0.0101	0.0016	7.53e-10	10.2	0.2429	1.13108e+06
rs11211123	1	45957609	A	G	0.2228	0.0104	0.0017	7.62e-10	15.1	0.146	1.13188e+06
rs2740795	8	91927455	A	T	0.7377	0.0098	0.0016	7.71e-10	0	0.7	1.12402e+06
rs17205908	6	127764305	T	C	0.3311	-0.0092	0.0015	7.71e-10	0	0.9385	1116821
rs10928190	2	144376033	T	C	0.452	-0.0087	0.0014	7.76e-10	32.8	0.0051	1131881
rs4984613	15	65023232	T	G	0.0683	0.0174	0.0028	7.76e-10	8.5	0.2906	1093576
rs17609255	17	50274170	T	C	0.4176	-0.0087	0.0014	7.9e-10	0.5	0.4648	1131881
rs11919835	3	70954273	C	G	0.3857	0.0089	0.0015	7.95e-10	20.5	0.0758	1116821
rs6720515	2	156603535	A	T	0.7763	0.0103	0.0017	7.95e-10	0	0.7581	1.13188e+06
rs2517086	8	17042416	C	G	0.5721	-0.0088	0.0014	8e-10	0	0.8684	1116832
rs35751693	2	98242555	T	C	0.0348	-0.0246	0.004	8.04e-10	14.1	0.2302	1.03002e+06
rs16975275	15	96046556	A	G	0.2306	-0.0102	0.0017	8.14e-10	27.9	0.0199	1.12743e+06
rs181214	17	56179482	T	C	0.2225	-0.0104	0.0017	8.19e-10	0	0.5781	1.11708e+06
rs818415	16	65448079	T	G	0.8092	-0.011	0.0018	8.19e-10	0	0.5346	1131084
rs117273411	9	23385738	T	C	0.954	-0.0211	0.0034	8.59e-10	0	0.9387	1.07125e+06
rs62506074	8	30906089	T	C	0.343	0.0091	0.0015	8.64e-10	0	0.5601	1110586
rs2007655	10	34586689	T	G	0.4976	0.0086	0.0014	8.64e-10	0	0.6594	1.13108e+06
rs4685405	3	16981683	T	G	0.1824	-0.0111	0.0018	8.69e-10	0	0.5932	1.13188e+06
rs34363861	2	73490412	A	G	0.5194	0.0087	0.0014	8.69e-10	0	0.7028	1115196
rs1963381	18	36125986	A	G	0.7506	0.0099	0.0016	8.8e-10	42.2	0.0002	1.13017e+06
rs72673097	1	44087925	A	G	0.0299	0.0257	0.0042	8.9e-10	17.1	0.1458	1.08951e+06
rs2554835	18	74141190	A	G	0.3998	0.0088	0.0014	8.95e-10	0	0.7516	1113501
rs9927049	16	71860008	A	G	0.7453	0.0099	0.0016	9.28e-10	21.2	0.065	1.13108e+06
rs72944064	18	63516255	T	C	0.7437	-0.0098	0.0016	9.39e-10	0	0.6783	1.13188e+06
rs75308819	2	140642378	A	G	0.0233	0.0287	0.0047	9.39e-10	6.9	0.3268	1.11101e+06
rs6729612	2	152780167	T	C	0.676	0.0092	0.0015	9.39e-10	2.5	0.418	1130168
rs10021733	4	28609476	T	C	0.1475	-0.0164	0.0027	9.45e-10	9.5	0.2653	615741
rs11917701	3	117174568	A	G	0.4041	-0.0087	0.0014	9.45e-10	27	0.0225	1.13006e+06
rs6696068	1	53740797	T	G	0.3838	-0.0088	0.0014	9.5e-10	21.2	0.0649	1130168
rs7449561	6	66215549	A	G	0.226	0.0102	0.0017	9.73e-10	3.3	0.3997	1.13188e+06
rs112512729	3	24905460	T	G	0.9282	-0.0166	0.0027	9.91e-10	17.5	0.1174	1.12756e+06
rs9866123	3	20631298	A	G	0.4804	0.0086	0.0014	1.02e-09	16.8	0.1204	1130168
rs143812851	16	61773849	A	G	0.1735	-0.0113	0.0019	1.03e-09	13	0.1897	1.12768e+06
rs164938	3	10315103	T	G	0.3922	-0.0088	0.0014	1.05e-09	0	0.5461	1131881
rs29792	5	168978148	A	T	0.3032	-0.0093	0.0015	1.06e-09	15.3	0.1453	1.13108e+06
rs1061801	6	33282338	A	G	0.187	-0.011	0.0018	1.06e-09	0	0.6149	1122614
rs7255223	19	32824310	A	C	0.2691	0.0097	0.0016	1.06e-09	0.5	0.4659	1.13017e+06
rs188251563	10	103744305	A	G	0.9895	0.0428	0.007	1.07e-09	2.9	0.4168	1.08572e+06
rs60717745	7	75846083	C	G	0.844	-0.0118	0.0019	1.08e-09	0	0.4776	1.13188e+06
rs1880692	11	80338069	A	G	0.5346	0.0086	0.0014	1.09e-09	14.6	0.1552	1.13188e+06
rs6469654	8	117632965	C	G	0.7769	-0.0103	0.0017	1.1e-09	0	0.8763	1.13108e+06
rs1880088	11	20959185	A	T	0.2618	-0.0097	0.0016	1.11e-09	0	0.6316	1.13188e+06
rs10947439	6	33774948	T	C	0.6627	0.009	0.0015	1.11e-09	8.6	0.2754	1131881
rs12709186	16	7249472	A	G	0.3236	-0.0091	0.0015	1.12e-09	0	0.5956	1131881
rs7575938	2	166910677	A	G	0.3408	0.009	0.0015	1.13e-09	7.7	0.2959	1131337
rs73518807	11	68282986	C	G	0.2609	-0.0128	0.0021	1.15e-09	0	0.75	651828
rs6871635	5	133830395	A	G	0.43	-0.0087	0.0014	1.16e-09	6	0.3361	1.11855e+06
rs1980129	4	17045911	A	G	0.4738	0.0085	0.0014	1.17e-09	0	0.6151	1131881
rs11780023	8	141992778	T	C	0.5051	0.0085	0.0014	1.17e-09	18.1	0.1033	1.1302e+06
rs7775100	6	96519657	T	C	0.3906	-0.0087	0.0014	1.2e-09	17.5	0.1087	1131881
rs74462621	8	133732856	T	C	0.1357	0.0125	0.002	1.21e-09	6.9	0.3158	1.12937e+06
rs73643713	9	4163612	T	C	0.928	-0.0165	0.0027	1.24e-09	8.3	0.2836	1.13151e+06
rs62190914	2	236788175	T	C	0.636	0.0089	0.0015	1.25e-09	1.9	0.4338	1.12937e+06
rs1538389	1	112327144	T	C	0.1894	-0.0109	0.0018	1.27e-09	0	0.9712	1.13188e+06
rs17883331	19	4954455	A	G	0.1918	-0.0108	0.0018	1.29e-09	19.4	0.0865	1.1269e+06
rs73874335	3	157933483	T	C	0.0607	-0.0178	0.0029	1.29e-09	14	0.1678	1.13134e+06
rs2929860	3	128691941	T	C	0.1878	0.011	0.0018	1.33e-09	0	0.5577	1105153
rs1427298	2	145214421	T	C	0.4264	0.0086	0.0014	1.33e-09	6.6	0.3232	1126179
rs1009470	9	122289187	T	G	0.4414	0.0086	0.0014	1.34e-09	14.6	0.1561	1131084
rs893522	3	165560618	A	C	0.9112	0.0149	0.0025	1.39e-09	0	0.8425	1.13188e+06
rs138484388	3	49511263	T	C	0.0224	-0.0306	0.0051	1.4e-09	24.1	0.1322	994630
rs322614	11	29755547	A	G	0.3817	-0.0087	0.0014	1.43e-09	0	0.7792	1131337
rs12746551	1	114374966	C	G	0.9689	0.0248	0.0041	1.44e-09	11.8	0.2241	1099521
rs2416759	9	123358262	A	G	0.6986	-0.0093	0.0015	1.45e-09	11.7	0.2148	1126938
rs429150	6	32075563	T	C	0.5292	0.0085	0.0014	1.5e-09	20.8	0.0716	1124680
rs11876620	18	52737309	T	C	0.0973	0.0143	0.0024	1.52e-09	0.2	0.4724	1.13097e+06
rs16871807	5	3437297	T	C	0.3297	0.009	0.0015	1.59e-09	12.1	0.2036	1131337
rs12970264	18	77627950	A	G	0.4386	-0.0085	0.0014	1.61e-09	0	0.7118	1129339
rs11644446	16	7943552	A	G	0.1562	0.0117	0.0019	1.61e-09	0	0.6527	1.12599e+06
rs2024568	20	44732089	T	C	0.2535	-0.0097	0.0016	1.61e-09	2	0.4304	1131881
rs4687735	3	53684371	T	C	0.0475	-0.02	0.0033	1.63e-09	2	0.4314	1.11305e+06
rs76267866	3	70540347	A	T	0.7926	0.0104	0.0017	1.64e-09	0	0.8536	1.13188e+06
rs1841023	4	163735584	A	C	0.6904	-0.0092	0.0015	1.64e-09	13.9	0.171	1127735
rs1758747	9	25300643	A	G	0.6962	0.0092	0.0015	1.64e-09	21.8	0.0603	1129371
rs12659776	5	167621274	T	G	0.5399	0.0085	0.0014	1.64e-09	0	0.5069	1131084
rs113588399	6	157236426	T	C	0.2079	-0.0104	0.0017	1.67e-09	0	0.8784	1.13188e+06
rs12028229	1	72986136	T	G	0.2631	0.0099	0.0016	1.67e-09	8.1	0.3131	1068112
rs7597412	2	142069014	C	G	0.3688	0.0088	0.0015	1.68e-09	0	0.4969	1.13188e+06
rs17574007	2	51230274	A	C	0.1215	-0.0129	0.0021	1.69e-09	0	0.7649	1.13188e+06
rs12127928	1	28708529	T	C	0.8057	0.0108	0.0018	1.69e-09	0	0.6004	1114309
rs11598765	10	23953725	A	G	0.1966	-0.0106	0.0018	1.73e-09	0	0.9791	1.13108e+06
rs6060308	20	33794378	A	G	0.2788	0.0095	0.0016	1.76e-09	16	0.1355	1117629
rs1544	21	33085585	A	G	0.2636	-0.0096	0.0016	1.76e-09	7.5	0.3017	1.13108e+06
rs2358628	14	74631757	A	C	0.3122	-0.0091	0.0015	1.78e-09	0	0.7614	1.13188e+06
rs7967550	12	92145307	A	G	0.3998	-0.0086	0.0014	1.79e-09	9.9	0.2472	1131881
rs62051146	16	72497721	A	C	0.8886	-0.0134	0.0022	1.79e-09	0	0.6224	1.13108e+06
rs852771	1	58288317	T	C	0.6963	0.0092	0.0015	1.84e-09	0	0.7651	1131881
rs12761729	10	107619932	T	C	0.7441	-0.0098	0.0016	1.87e-09	5.6	0.3461	1.08884e+06
rs2898191	21	34288509	A	C	0.6921	0.0093	0.0015	1.88e-09	11	0.2278	1.09445e+06
rs6946362	7	6574807	T	C	0.6884	0.0091	0.0015	1.89e-09	0	0.5005	1121633
rs2100249	7	113848497	T	G	0.3488	-0.0089	0.0015	1.91e-09	3.2	0.4018	1125985
rs2916490	2	80192352	A	G	0.3023	-0.0092	0.0015	1.92e-09	0	0.6504	1.13188e+06
rs6480234	10	68636894	T	C	0.525	-0.0084	0.0014	1.94e-09	0	0.8563	1131084
rs114810763	6	30398390	A	G	0.1549	-0.0121	0.002	1.98e-09	25.7	0.0501	1.04334e+06
rs28513882	3	107296628	A	G	0.1783	-0.011	0.0018	2.03e-09	0	0.8618	1.13188e+06
rs10208	17	42300278	T	C	0.3173	0.0091	0.0015	2.07e-09	0	0.862	1124815
rs11724690	4	186764747	T	G	0.2887	0.0093	0.0015	2.08e-09	0	0.9077	1130168
rs2657283	10	76920199	T	C	0.5884	0.0085	0.0014	2.08e-09	3.4	0.3963	1131084
rs933738	12	49943122	A	G	0.8193	-0.011	0.0018	2.08e-09	0	0.4816	1.11934e+06
rs41282553	22	31286928	A	G	0.0339	0.0237	0.004	2.09e-09	13.8	0.1986	1085844
rs9513416	13	99055774	A	G	0.8437	-0.0116	0.0019	2.18e-09	11.5	0.2154	1.13108e+06
rs4658019	1	196149936	T	C	0.4531	0.0084	0.0014	2.19e-09	0.6	0.4639	1.13017e+06
rs4788115	16	28998111	A	T	0.1804	0.0111	0.0019	2.27e-09	3.2	0.408	1.0849e+06
rs34394051	1	6853091	A	G	0.8429	-0.0117	0.002	2.3e-09	6	0.3363	1095250
rs9568798	13	53614554	T	C	0.2912	-0.0093	0.0016	2.3e-09	0	0.7473	1118545
rs12054166	3	150093445	C	G	0.7399	0.0096	0.0016	2.3e-09	0	0.5136	1.13188e+06
rs8097125	18	13005473	T	C	0.3802	0.0086	0.0014	2.31e-09	3.6	0.3932	1128473
rs4719460	7	859610	T	C	0.656	-0.0088	0.0015	2.34e-09	0	0.6167	1127735
rs59967356	3	71639294	T	C	0.8698	-0.0127	0.0021	2.34e-09	15.3	0.1774	1.0825e+06
rs312945	2	21328825	A	G	0.3051	-0.0091	0.0015	2.34e-09	0	0.7302	1131881
rs7816777	8	19371767	T	C	0.3526	-0.0088	0.0015	2.35e-09	0	0.6914	1131084
rs9465509	6	19744129	A	G	0.4824	-0.0084	0.0014	2.35e-09	0	0.7419	1131881
rs1404549	3	65454923	A	G	0.3278	-0.0089	0.0015	2.38e-09	0	0.8389	1130168
rs12962845	18	22654102	C	G	0.1325	-0.0123	0.0021	2.38e-09	0	0.9957	1.13188e+06
rs7855503	9	86381638	C	G	0.3478	0.0088	0.0015	2.39e-09	0	0.8229	1.12865e+06
rs1564347	15	73438848	T	G	0.3433	0.0088	0.0015	2.39e-09	16.6	0.1275	1128827
rs9683585	4	2702804	C	G	0.5677	0.0084	0.0014	2.46e-09	0	0.6353	1.13188e+06
rs736281	14	94287830	T	C	0.3931	0.0086	0.0014	2.49e-09	0	0.6971	1131881
rs12113634	7	111996952	T	C	0.6504	0.0088	0.0015	2.5e-09	6.8	0.3169	1131881
rs631287	9	128412676	A	G	0.558	0.0084	0.0014	2.52e-09	0	0.6013	1128651
rs6917154	6	167135156	T	C	0.1236	0.0127	0.0021	2.55e-09	0	0.8136	1.12448e+06
rs6757087	2	212680523	T	G	0.5755	-0.0085	0.0014	2.55e-09	20.8	0.0716	1127698
rs28587776	5	177030177	T	C	0.3541	0.0088	0.0015	2.55e-09	0	0.9083	1120927
rs2034631	4	82225529	T	C	0.6508	0.0089	0.0015	2.64e-09	0	0.7867	1095250
rs62103198	18	77634276	T	C	0.9087	-0.0147	0.0025	2.69e-09	0	0.6818	1096545
rs1542354	2	221814085	A	G	0.4764	-0.0084	0.0014	2.72e-09	0	0.6516	1130168
rs112603734	6	6069588	A	C	0.7699	-0.0131	0.0022	2.72e-09	18.9	0.1005	650659
rs8052523	16	9293246	T	C	0.5697	-0.0084	0.0014	2.73e-09	0	0.751	1130168
rs622169	1	244437407	T	C	0.4536	0.0086	0.0014	2.73e-09	0	0.5328	1.07206e+06
rs34811474	4	25408838	A	G	0.2242	0.0104	0.0017	2.75e-09	10.2	0.2885	1053039
rs12981405	19	19651577	T	C	0.1664	-0.0112	0.0019	2.75e-09	9.3	0.2604	1.13017e+06
rs2332179	3	122079430	A	G	0.861	0.0121	0.002	2.76e-09	0	0.9289	1.13006e+06
rs62174974	2	185053385	A	G	0.1949	-0.0105	0.0018	2.76e-09	1.3	0.4479	1.13188e+06
rs716513	13	69488908	A	T	0.536	0.0084	0.0014	2.83e-09	3.2	0.4011	1130540
rs10877283	12	59837734	T	G	0.5973	0.0085	0.0014	2.86e-09	27.9	0.0178	1131881
rs10411759	19	1857297	A	G	0.1561	0.0116	0.002	2.88e-09	0	0.5586	1.10477e+06
rs72917504	2	175225018	T	C	0.0583	-0.0178	0.003	2.91e-09	24.1	0.0409	1.13054e+06
rs113615161	7	114519339	T	C	0.133	-0.0123	0.0021	2.98e-09	0	0.4995	1.12618e+06
rs17882802	10	101983413	A	G	0.4295	0.0084	0.0014	3e-09	24.9	0.0342	1.13108e+06
rs60589532	2	58072605	A	G	0.9345	0.0168	0.0028	3.03e-09	0	0.7468	1.13188e+06
rs1097784	16	10249416	T	C	0.5021	-0.0083	0.0014	3.05e-09	7.7	0.297	1130168
rs10193498	2	174094345	A	T	0.755	0.0097	0.0016	3.1e-09	0	0.7771	1.13188e+06
rs79855925	5	60095384	T	C	0.0488	-0.0194	0.0033	3.1e-09	18.2	0.109	1.1141e+06
rs10831656	11	11660815	T	C	0.3134	0.009	0.0015	3.1e-09	0	0.9598	1.13017e+06
rs4785187	16	49766772	A	G	0.2253	-0.01	0.0017	3.12e-09	0	0.4842	1.1269e+06
rs2199409	11	39915234	T	C	0.7962	0.0103	0.0017	3.14e-09	6.8	0.317	1.13017e+06
rs7905192	10	12711949	T	C	0.572	0.0084	0.0014	3.14e-09	6.1	0.3332	1.13188e+06
rs55826493	2	12836640	T	G	0.1216	-0.0127	0.0021	3.16e-09	8.8	0.2721	1.13188e+06
rs1427829	12	89760744	A	G	0.4546	-0.0083	0.0014	3.29e-09	0	0.6409	1.13134e+06
rs61853335	10	64884737	T	C	0.1769	-0.0109	0.0018	3.29e-09	7.8	0.2952	1.13108e+06
rs1529597	15	57190064	A	C	0.9637	0.0223	0.0038	3.36e-09	10.1	0.2543	1.1138e+06
rs12614263	2	4123797	A	G	0.4959	0.0083	0.0014	3.38e-09	21.7	0.0586	1131881
rs1024268	1	70117404	T	C	0.4186	-0.0084	0.0014	3.4e-09	0	0.6164	1.13188e+06
rs9371883	6	155644978	C	G	0.643	-0.0087	0.0015	3.42e-09	0	0.9403	1.13017e+06
rs6490618	13	21338343	T	C	0.327	0.0088	0.0015	3.48e-09	5.9	0.3366	1131881
rs28505285	7	44377654	C	G	0.1884	0.0106	0.0018	3.5e-09	0	0.8806	1.13017e+06
rs12568153	1	213151580	T	G	0.2902	-0.0091	0.0015	3.52e-09	20.7	0.0713	1.12774e+06
rs1467737	9	124982500	T	C	0.4746	-0.0084	0.0014	3.52e-09	0	0.9021	1111766
rs2805064	9	24530615	C	G	0.7291	0.0093	0.0016	3.54e-09	2.4	0.4205	1.12937e+06
rs7849480	9	14648130	A	G	0.4353	-0.0084	0.0014	3.54e-09	11	0.2276	1129371
rs4127499	11	122176383	A	G	0.3495	0.0087	0.0015	3.56e-09	7.4	0.307	1119214
rs74944857	4	66496914	T	G	0.3223	-0.0089	0.0015	3.62e-09	16.8	0.1247	1.12925e+06
rs34298584	18	39026695	A	G	0.1688	0.0111	0.0019	3.67e-09	0	0.7619	1.13017e+06
rs12005151	9	135030649	A	G	0.3615	0.0087	0.0015	3.73e-09	0	0.9779	1114399
rs10845051	12	10291446	A	T	0.5055	0.0083	0.0014	3.75e-09	0	0.6968	1117629
rs150252215	3	49296234	A	T	0.0437	0.0204	0.0035	3.82e-09	3.4	0.4001	1.10774e+06
rs58779949	11	64007159	A	C	0.1698	0.011	0.0019	3.84e-09	16	0.1337	1.12994e+06
rs6020560	20	49119419	T	C	0.5258	-0.0083	0.0014	3.84e-09	0	0.6775	1.13134e+06
rs34316274	16	1018697	A	G	0.762	0.0097	0.0017	3.86e-09	12.1	0.2061	1.12395e+06
rs34410	5	107469684	C	G	0.4628	-0.0083	0.0014	3.86e-09	0	0.8588	1.13108e+06
rs141586924	18	50167764	A	G	0.3021	-0.009	0.0015	3.91e-09	0	0.6038	1.13017e+06
rs17186106	4	91703241	T	G	0.1771	0.0108	0.0018	3.95e-09	0	0.5096	1.13188e+06
rs977143	18	38028165	A	G	0.3725	0.0085	0.0015	3.95e-09	0	0.9827	1.13188e+06
rs9563168	13	54247827	A	G	0.2117	0.0101	0.0017	4.07e-09	0	0.5267	1.13108e+06
rs11030084	11	27643725	T	C	0.1845	0.0106	0.0018	4.07e-09	0	0.5823	1131881
rs4664983	2	159454438	T	C	0.1987	-0.0103	0.0018	4.11e-09	0	0.9788	1.13188e+06
rs6503409	17	43058742	T	C	0.3463	0.0087	0.0015	4.11e-09	0	0.6941	1125752
rs34122915	1	72509742	C	G	0.503	0.0084	0.0014	4.16e-09	0	0.6987	1084977
rs6774533	3	62471086	T	C	0.6985	0.009	0.0015	4.18e-09	20.3	0.0763	1116909
rs1107871	12	132240659	A	G	0.5506	-0.0083	0.0014	4.18e-09	0	0.4866	1131881
rs16966271	15	38423730	T	C	0.2819	0.0092	0.0016	4.21e-09	27.8	0.0203	1128827
rs58996896	2	123735005	A	G	0.7388	-0.0094	0.0016	4.23e-09	0	0.6632	1.13188e+06
rs2458370	1	117874944	T	C	0.6409	-0.0086	0.0015	4.23e-09	6.5	0.3233	1.13188e+06
rs10742591	11	41548956	A	T	0.6097	-0.0084	0.0014	4.26e-09	0	0.5374	1.13188e+06
rs117623407	19	32204489	A	G	0.8536	-0.0118	0.002	4.3e-09	0	0.7378	1095416
rs2962378	5	90950210	A	G	0.7872	0.0101	0.0017	4.3e-09	27.6	0.0197	1131084
rs2373124	7	85830272	A	G	0.7604	-0.0096	0.0016	4.35e-09	0	0.4813	1.13188e+06
rs2870281	4	91945572	A	C	0.441	-0.0083	0.0014	4.35e-09	7.3	0.3057	1131881
rs4810894	20	47532999	A	G	0.3706	-0.0085	0.0015	4.38e-09	5.4	0.3504	1.13017e+06
rs10046069	5	89115576	A	G	0.1203	0.0127	0.0022	4.4e-09	0	0.7344	1.13108e+06
rs2414072	15	50850562	A	T	0.4443	-0.0083	0.0014	4.45e-09	10.9	0.228	1131084
rs10006235	4	130670108	T	C	0.2689	-0.0093	0.0016	4.48e-09	0	0.8749	1.13134e+06
rs12123293	1	210912835	T	C	0.6476	0.0086	0.0015	4.48e-09	0	0.6628	1131881
rs28482086	1	75226252	A	G	0.3494	0.0086	0.0015	4.51e-09	6.6	0.3213	1130168
rs12646216	4	45980056	T	C	0.3889	0.0084	0.0014	4.56e-09	0	0.9853	1.13017e+06
rs854796	17	18070761	A	G	0.6932	0.009	0.0015	4.66e-09	3.7	0.3901	1.12061e+06
rs1593022	5	106685563	T	G	0.2256	-0.0099	0.0017	4.69e-09	17.2	0.1168	1.11854e+06
rs736471	3	50519392	T	C	0.4653	0.0083	0.0014	4.69e-09	5.6	0.3474	1.11399e+06
rs8009933	14	39600212	A	G	0.6783	0.0088	0.0015	4.72e-09	0	0.9608	1131881
rs183869217	2	81751340	C	G	0.9409	0.0174	0.003	4.72e-09	13.7	0.1735	1.13017e+06
rs35754740	16	63127870	T	C	0.5811	0.0083	0.0014	4.77e-09	0	0.7731	1129371
rs62018216	15	51387404	T	G	0.1549	0.0113	0.0019	4.83e-09	30.6	0.0097	1.13108e+06
rs59300999	21	33072363	T	C	0.9325	-0.0164	0.0028	4.85e-09	0	0.5617	1.13071e+06
rs13177031	5	60853523	A	T	0.3703	-0.0085	0.0015	4.88e-09	0.1	0.4743	1128651
rs72896637	2	183543531	T	G	0.0707	0.0162	0.0028	4.88e-09	7.8	0.3028	1.10792e+06
rs72834698	6	26176517	A	G	0.144	0.0117	0.002	4.91e-09	0	0.8249	1.13017e+06
rs2926702	8	71167994	T	C	0.8739	-0.0124	0.0021	4.91e-09	0	0.7401	1131084
rs143743568	22	39289014	A	G	0.154	0.0118	0.002	4.99e-09	2.3	0.4244	1.05721e+06
rs39998	16	28133152	A	C	0.2967	0.009	0.0015	5.02e-09	0	0.6783	1131084
rs13154429	5	59608950	C	G	0.1016	-0.0136	0.0023	5.02e-09	13.9	0.1708	1129371
rs9927137	16	30634300	A	G	0.5298	0.0082	0.0014	5.11e-09	0	0.4875	1.12441e+06
rs57148205	2	225689421	A	G	0.2438	0.0095	0.0016	5.17e-09	0	0.6451	1.13134e+06
rs8103741	19	2325005	A	G	0.822	-0.0108	0.0019	5.17e-09	22.5	0.0649	1.10288e+06
rs16901689	5	11507368	T	G	0.1634	0.0111	0.0019	5.17e-09	0	0.7043	1.13108e+06
rs2077235	16	3629227	T	C	0.2373	0.0097	0.0017	5.2e-09	0	0.5883	1110457
rs2039204	9	130371107	A	T	0.5296	0.0082	0.0014	5.23e-09	0	0.5954	1127815
rs4739235	8	21287105	A	G	0.1701	0.0109	0.0019	5.26e-09	0	0.8463	1.13108e+06
rs10879676	12	74152402	T	C	0.5833	-0.0083	0.0014	5.29e-09	10.3	0.2402	1129935
rs7894722	10	9972046	T	C	0.3748	0.0085	0.0014	5.41e-09	11	0.225	1.13017e+06
rs173003	19	36240960	A	C	0.4934	-0.0082	0.0014	5.5e-09	4	0.3824	1129935
rs1835339	2	183393680	T	C	0.6132	0.0084	0.0014	5.59e-09	13.4	0.1784	1130168
rs62370510	5	52789198	A	T	0.1771	-0.0109	0.0019	5.59e-09	0	0.5476	1.09445e+06
rs6977237	7	14027991	T	C	0.4725	0.0082	0.0014	5.59e-09	0	0.5343	1.13188e+06
rs7158218	14	73934880	A	C	0.7117	-0.009	0.0015	5.63e-09	12.5	0.1948	1131881
rs13190235	5	65964783	T	C	0.9036	-0.0138	0.0024	5.66e-09	0	0.6352	1.13108e+06
rs1910005	5	81110866	T	C	0.708	-0.009	0.0015	5.66e-09	11	0.2253	1131084
rs71646142	1	212369228	T	C	0.1893	0.0104	0.0018	5.69e-09	0	0.9111	1.13188e+06
rs162445	5	7943246	A	G	0.0788	0.0152	0.0026	5.72e-09	9.1	0.2643	1.13188e+06
rs75756843	12	110111274	A	G	0.0214	0.0288	0.0049	5.79e-09	3.1	0.4112	1.08612e+06
rs5754581	22	33910736	T	C	0.5542	-0.0082	0.0014	5.85e-09	0	0.594	1130168
rs13398860	2	50692940	A	G	0.6529	0.0086	0.0015	5.89e-09	1.5	0.4426	1.12835e+06
rs79585412	21	46487730	T	C	0.9428	-0.0178	0.0031	5.92e-09	11.2	0.2344	1.10459e+06
rs55675587	1	66224881	T	C	0.1926	-0.0103	0.0018	5.92e-09	0	0.8568	1.13188e+06
rs201495	7	101755522	T	C	0.559	-0.0112	0.0019	5.92e-09	9.5	0.2694	606717
rs42302	5	74965554	A	G	0.3441	0.0086	0.0015	5.96e-09	0	0.5641	1129371
rs9435340	1	107593201	A	T	0.6615	0.0086	0.0015	5.99e-09	20.1	0.077	1.12945e+06
rs7958371	12	103456084	A	T	0.3552	-0.0085	0.0015	5.99e-09	6.4	0.3261	1131881
rs9649	17	34050934	T	C	0.1749	0.0108	0.0019	6.13e-09	11.3	0.219	1.12233e+06
rs912883	6	41552040	T	C	0.6781	0.0087	0.0015	6.2e-09	11.7	0.2114	1.13017e+06
rs2522545	4	106378284	T	C	0.4083	-0.0083	0.0014	6.23e-09	1.6	0.4397	1131881
rs6853599	4	3445610	T	C	0.1787	0.0108	0.0019	6.27e-09	0	0.7785	1.10554e+06
rs4904523	14	89723630	A	G	0.5208	-0.0082	0.0014	6.27e-09	0	0.6724	1131881
rs2542673	16	54206715	A	C	0.3243	0.0088	0.0015	6.3e-09	0	0.8872	1115314
rs2964255	5	152052332	A	G	0.3066	0.0088	0.0015	6.34e-09	0	0.4841	1131084
rs17686649	6	93568527	T	C	0.2192	-0.0098	0.0017	6.37e-09	0	0.9436	1.13188e+06
rs10782651	1	77934335	T	C	0.5516	-0.0082	0.0014	6.37e-09	19.9	0.0783	1.13188e+06
rs6445633	3	54230638	A	C	0.3127	0.0088	0.0015	6.37e-09	0	0.5562	1.13188e+06
rs17536059	11	110957335	C	G	0.1721	-0.0108	0.0019	6.45e-09	14.4	0.1592	1.13188e+06
rs74453875	3	52046707	A	G	0.0392	0.0214	0.0037	6.48e-09	0	0.9535	1090152
rs11720093	3	50562042	T	C	0.0809	0.015	0.0026	6.48e-09	5.8	0.3429	1.1157e+06
rs13388333	2	242400597	A	G	0.6337	0.0085	0.0015	6.48e-09	0	0.6142	1.13054e+06
rs12952191	17	52077386	T	C	0.4895	-0.0081	0.0014	6.52e-09	24.1	0.04	1131337
rs1890132	1	199427321	T	C	0.7056	-0.0089	0.0015	6.56e-09	23.4	0.0439	1.13188e+06
rs10061420	5	104678079	A	T	0.4741	0.0082	0.0014	6.63e-09	9.2	0.2655	1118545
rs4712371	6	19227667	A	G	0.1217	-0.0124	0.0021	6.63e-09	3.3	0.3992	1.13188e+06
rs1505676	4	62127291	C	G	0.6293	0.0084	0.0015	6.67e-09	0	0.9563	1.13188e+06
rs11613431	12	26684343	A	G	0.262	-0.0094	0.0016	6.71e-09	0	0.4951	1.09525e+06
rs4977885	9	23687983	A	G	0.3971	-0.0084	0.0014	6.78e-09	22	0.0598	1.11293e+06
rs13284516	9	23423785	C	G	0.5452	-0.0082	0.0014	6.78e-09	0	0.7559	1113013
rs67790232	12	46079172	A	G	0.794	0.0101	0.0017	6.9e-09	24.2	0.0409	1.12033e+06
rs12467175	2	229189860	T	C	0.4923	-0.0081	0.0014	6.9e-09	12.7	0.1893	1131881
rs10795831	10	10943379	T	G	0.212	-0.0099	0.0017	6.98e-09	18.7	0.0931	1.13188e+06
rs17148998	10	10909401	A	G	0.2042	0.0101	0.0017	6.98e-09	0	0.5501	1.13188e+06
rs9666728	11	87907712	T	C	0.4427	-0.0082	0.0014	7.1e-09	2.8	0.4102	1131881
rs112379405	3	76230061	C	G	0.5502	-0.0082	0.0014	7.1e-09	29.5	0.0124	1131881
rs6780414	3	67384670	T	C	0.8176	0.0105	0.0018	7.1e-09	0	0.5739	1.13188e+06
rs79997166	2	161808690	A	C	0.9375	0.0172	0.003	7.14e-09	24.7	0.0618	1.07271e+06
rs115693355	3	108284214	A	G	0.0192	0.0309	0.0053	7.22e-09	23.3	0.0736	1.03564e+06
rs13397529	2	161235981	C	G	0.2363	-0.0097	0.0017	7.22e-09	0	0.6327	1.09525e+06
rs186456786	13	58698035	A	G	0.9906	0.0455	0.0079	7.26e-09	0	0.6045	965186
rs73405293	12	117522917	A	G	0.1516	0.0113	0.002	7.42e-09	0	0.7298	1.12388e+06
rs12601380	17	34904985	A	C	0.5739	-0.0082	0.0014	7.42e-09	0	0.536	1128549
rs13212041	6	78171124	T	C	0.7978	0.0101	0.0018	7.42e-09	13.9	0.1723	1.12447e+06
rs56408528	2	193706511	T	C	0.5121	-0.0082	0.0014	7.47e-09	6	0.3371	1.11763e+06
rs3847228	9	1798805	T	C	0.406	0.0083	0.0014	7.47e-09	10.2	0.2425	1.11691e+06
rs10996167	10	66813928	C	G	0.6512	0.0113	0.002	7.47e-09	2.2	0.4274	639036
rs4283754	5	59570258	A	G	0.4787	-0.0084	0.0014	7.55e-09	0.8	0.4572	1.06226e+06
rs4502401	2	199323526	T	C	0.6542	0.0085	0.0015	7.55e-09	0	0.9448	1127048
rs7146625	14	84788153	A	G	0.7313	0.0091	0.0016	7.55e-09	0	0.5902	1.13017e+06
rs3781339	10	105428152	T	C	0.1962	-0.0104	0.0018	7.55e-09	12.6	0.1972	1.09274e+06
rs2321157	13	58736901	A	G	0.5303	-0.0081	0.0014	7.64e-09	2.9	0.4091	1131084
rs35111506	11	65334712	C	G	0.9432	-0.0175	0.003	7.9e-09	14.6	0.161	1.12813e+06
rs12516990	5	145927688	C	G	0.2106	-0.0099	0.0017	7.9e-09	0	0.8572	1.13108e+06
rs11209894	1	41798668	A	G	0.1377	0.0119	0.0021	8.03e-09	7.6	0.299	1.09525e+06
rs4787028	16	7533021	T	C	0.6622	0.0086	0.0015	8.08e-09	0	0.643	1118455
rs633279	6	93840705	A	T	0.2957	-0.0089	0.0015	8.12e-09	2	0.429	1.13188e+06
rs12304188	12	97981272	A	G	0.842	0.0111	0.0019	8.17e-09	0	0.7126	1.13188e+06
rs61958175	13	58680250	A	G	0.9538	-0.0198	0.0034	8.22e-09	31.9	0.0207	1067800
rs28669886	12	106722701	A	G	0.3548	-0.0084	0.0015	8.31e-09	20	0.0772	1131881
rs3790609	1	113056990	T	C	0.1744	0.0107	0.0019	8.35e-09	0	0.8536	1.11691e+06
rs6989141	8	142681460	A	G	0.208	0.01	0.0017	8.4e-09	21.7	0.0644	1.12315e+06
rs2929032	8	56371745	A	G	0.4654	-0.0081	0.0014	8.4e-09	8.4	0.2808	1131084
rs9916901	18	40238335	T	G	0.7377	0.0092	0.0016	8.4e-09	26.1	0.0261	1.13188e+06
rs1779549	14	84640016	A	C	0.46	0.0081	0.0014	8.45e-09	0	0.5035	1.13017e+06
rs75434274	7	155424887	A	G	0.9205	0.0151	0.0026	8.54e-09	0	0.704	1.09867e+06
rs6428587	1	90825188	T	C	0.6323	0.0084	0.0015	8.59e-09	8.7	0.2723	1131881
rs80223410	12	56367966	T	C	0.1426	-0.0118	0.002	8.64e-09	0	0.5456	1087061
rs72883760	11	29331969	A	G	0.1985	0.0101	0.0018	8.64e-09	0	0.5314	1.13188e+06
rs9294770	6	68242866	T	C	0.3879	0.0083	0.0014	8.74e-09	5.8	0.3406	1130168
rs1693584	8	101748917	T	C	0.6856	-0.0087	0.0015	8.79e-09	0	0.8842	1129371
rs7084508	10	133932946	T	C	0.3479	-0.0085	0.0015	8.79e-09	0	0.5493	1113485
rs648044	11	114030799	A	G	0.3892	0.0083	0.0015	8.89e-09	0	0.6738	1110597
rs1440930	4	65902342	C	G	0.4535	0.0081	0.0014	8.94e-09	1.5	0.4431	1131337
rs8046072	16	3562075	A	G	0.8017	0.0101	0.0018	9.04e-09	0	0.7906	1.13017e+06
rs702606	5	53167117	T	C	0.8654	0.0118	0.0021	9.19e-09	6.4	0.3256	1.13108e+06
rs16851779	2	215189950	T	C	0.9246	-0.0153	0.0027	9.24e-09	6.7	0.3201	1131337
rs13034349	2	98329197	T	C	0.4076	-0.0082	0.0014	9.29e-09	7.1	0.3114	1.13134e+06
rs9870317	3	182514636	A	C	0.3212	0.0086	0.0015	9.35e-09	0	0.7752	1.13188e+06
rs11765387	7	32494790	T	C	0.6734	0.0086	0.0015	9.4e-09	0	0.596	1131881
rs2954114	12	122169884	A	C	0.468	-0.0081	0.0014	9.4e-09	9	0.2736	1122948
rs150537577	4	705629	A	G	0.9195	-0.0151	0.0026	9.5e-09	4.4	0.3808	1.08502e+06
rs4972748	2	176098010	T	C	0.8204	0.0105	0.0018	9.5e-09	0	0.7466	1.12945e+06
rs2314338	17	38344485	T	C	0.7304	0.0093	0.0016	9.5e-09	25	0.0546	1078198
rs795230	11	30774525	T	C	0.4283	0.0081	0.0014	9.56e-09	14.5	0.1579	1130053
rs4915735	1	61808444	A	G	0.1408	0.0116	0.002	9.56e-09	11.3	0.2184	1130168
rs2088913	3	117310069	A	G	0.5732	0.0081	0.0014	9.61e-09	21.5	0.0619	1130061
rs12234369	7	11893275	A	G	0.3142	0.0087	0.0015	9.61e-09	0	0.866	1130168
rs6043521	20	15739745	T	C	0.6035	-0.0083	0.0014	9.72e-09	0	0.7007	1116742
rs2588959	10	63598957	T	C	0.5019	-0.008	0.0014	9.88e-09	0	0.6371	1.13108e+06
rs17667540	2	181614913	A	G	0.3053	-0.0087	0.0015	9.94e-09	23.2	0.0469	1.13017e+06
rs3766979	1	181636598	A	G	0.3386	0.0085	0.0015	9.94e-09	7.1	0.3094	1.13188e+06
rs57204268	11	133844024	A	G	0.8497	0.0114	0.002	9.94e-09	6.2	0.3385	1.09866e+06
rs6695132	1	234734655	T	C	0.2216	0.0097	0.0017	1.01e-08	7.7	0.2959	1.13188e+06
rs150421637	3	51047621	A	G	0.0169	0.0349	0.0061	1.04e-08	20.2	0.245	903058
rs73106136	20	43491477	T	G	0.0828	-0.0147	0.0026	1.05e-08	28.5	0.0178	1.11593e+06
rs10943588	6	79510994	A	C	0.6187	0.0084	0.0015	1.05e-08	7.3	0.3048	1.09525e+06
rs13026611	2	128153335	A	G	0.3555	-0.0084	0.0015	1.05e-08	3.4	0.3976	1.13017e+06
rs115732722	3	180691034	A	G	0.0101	-0.0415	0.0072	1.06e-08	0	0.8652	1.05966e+06
rs3848715	20	44564682	A	G	0.5129	-0.008	0.0014	1.07e-08	5.8	0.3401	1.13188e+06
rs868456	4	32150029	A	G	0.7117	0.0089	0.0015	1.07e-08	0	0.6555	1131881
rs548897	1	57718030	A	G	0.45	0.0081	0.0014	1.1e-08	1.1	0.4519	1131881
rs7182216	15	84422506	C	G	0.2277	-0.0096	0.0017	1.1e-08	0	0.8446	1129138
rs61387839	2	48688635	A	G	0.695	0.0088	0.0015	1.11e-08	12.3	0.2029	1115809
rs2126069	11	115473374	T	C	0.4773	0.008	0.0014	1.11e-08	0	0.5959	1130168
rs73457936	9	23233667	A	G	0.9151	0.0144	0.0025	1.11e-08	16	0.1381	1.12846e+06
rs2011603	4	18025484	A	G	0.7359	-0.0091	0.0016	1.12e-08	0	0.8206	1128222
rs72993796	2	240321051	T	C	0.8836	0.0127	0.0022	1.12e-08	12	0.2263	1.09811e+06
rs7714719	5	106498927	C	G	0.8602	0.0116	0.002	1.12e-08	17.9	0.1048	1.13108e+06
rs10169002	2	140563368	A	G	0.5305	-0.008	0.0014	1.15e-08	0	0.5386	1130168
rs6744040	2	49908151	A	G	0.5117	-0.008	0.0014	1.15e-08	0	0.5485	1.12835e+06
rs6711399	2	200462840	T	C	0.1779	-0.0107	0.0019	1.16e-08	0	0.4984	1090989
rs117398064	12	26523628	C	G	0.0912	-0.0141	0.0025	1.16e-08	9.6	0.2557	1092817
rs182902112	5	153304758	A	C	0.0186	-0.03	0.0053	1.17e-08	5.2	0.3643	1.09918e+06
rs8066044	17	1367352	A	G	0.2712	0.009	0.0016	1.17e-08	0	0.7518	1125265
rs62252819	3	53440128	A	T	0.7522	-0.0094	0.0017	1.2e-08	0	0.603	1.09354e+06
rs2250660	2	233752551	C	G	0.5009	0.008	0.0014	1.2e-08	0	0.646	1.12937e+06
rs4730020	7	104189082	T	C	0.2697	0.009	0.0016	1.21e-08	11.5	0.2144	1.13017e+06
rs12891191	14	58100283	C	G	0.5179	0.008	0.0014	1.21e-08	22.8	0.051	1126899
rs9974899	21	42006441	T	C	0.2538	-0.0093	0.0016	1.22e-08	0	0.843	1.11202e+06
rs1554798	2	156835059	A	C	0.4667	-0.008	0.0014	1.22e-08	7	0.3127	1.12928e+06
rs73082325	3	48981024	C	G	0.9701	-0.0252	0.0044	1.24e-08	0	0.8422	977180
rs339057	7	128376900	A	G	0.4185	-0.0081	0.0014	1.26e-08	23	0.0486	1130168
rs6752228	2	161547697	T	G	0.5523	-0.008	0.0014	1.26e-08	0	0.5591	1.13188e+06
rs61757207	16	70358495	A	G	0.9854	0.0359	0.0063	1.27e-08	27.2	0.118	969687
rs6461536	7	21131807	A	G	0.7118	0.0088	0.0015	1.28e-08	0	0.8175	1130168
rs2469226	15	77246990	A	T	0.2228	0.0096	0.0017	1.28e-08	13.9	0.1691	1.13108e+06
rs2976397	8	143764613	T	G	0.4317	0.0081	0.0014	1.3e-08	21.5	0.0633	1130540
rs61748951	1	156038058	A	C	0.0239	-0.0273	0.0048	1.31e-08	0	0.5532	1.03179e+06
rs1728118	6	108029518	A	C	0.7272	0.0089	0.0016	1.32e-08	10.2	0.2418	1131881
rs13402497	2	115826318	A	T	0.4902	-0.008	0.0014	1.33e-08	3.5	0.3946	1.13006e+06
rs4894658	3	173928736	C	G	0.2619	0.0091	0.0016	1.34e-08	0	0.9247	1.13188e+06
rs563954	11	132391656	A	G	0.4639	-0.0081	0.0014	1.34e-08	0	0.8319	1.09525e+06
rs387027	16	12085343	A	C	0.3609	-0.0083	0.0015	1.36e-08	14.4	0.1622	1129624
rs114958262	3	108039298	T	C	0.035	-0.022	0.0039	1.36e-08	0	0.4963	1.09485e+06
rs13009915	2	100423158	T	C	0.0378	0.0212	0.0037	1.36e-08	10.6	0.2572	1.09299e+06
rs10793903	9	134976652	A	G	0.1146	0.0126	0.0022	1.37e-08	4.7	0.3672	1.1144e+06
rs1066769	2	189580148	A	G	0.0311	-0.023	0.0041	1.38e-08	26.1	0.0348	1.12082e+06
rs10499535	7	21690606	A	G	0.5013	0.008	0.0014	1.4e-08	11.6	0.2113	1.13188e+06
rs6951996	7	96646437	A	T	0.0522	-0.0182	0.0032	1.41e-08	16.5	0.1356	1.0982e+06
rs35745455	7	5824100	A	G	0.501	0.008	0.0014	1.43e-08	0	0.6436	1.13017e+06
rs2977464	8	141545193	T	C	0.1869	0.0102	0.0018	1.46e-08	0	0.6902	1.13108e+06
rs382196	3	9145554	T	G	0.3814	-0.0082	0.0014	1.47e-08	24.8	0.034	1131881
rs10444280	11	41155897	T	C	0.7982	0.01	0.0018	1.47e-08	0	0.9208	1.11674e+06
rs713584	5	136416957	A	G	0.4248	-0.008	0.0014	1.48e-08	11.8	0.209	1131084
rs7030373	9	121161926	A	G	0.2074	-0.0098	0.0017	1.49e-08	0	0.9696	1.13108e+06
rs117895796	12	49729637	T	C	0.0143	0.0362	0.0064	1.51e-08	51	0.0039	964534
rs66721975	2	191701185	A	G	0.2903	-0.0087	0.0015	1.51e-08	0	0.8532	1131881
rs36085856	15	70379236	C	G	0.0734	0.0201	0.0036	1.52e-08	0	0.5683	648897
rs2131167	12	99633189	A	G	0.4458	0.008	0.0014	1.52e-08	0	0.9887	1130168
rs116967397	13	58466434	A	C	0.9829	0.0315	0.0056	1.53e-08	4.7	0.3851	1069709
rs78714229	6	25793055	T	C	0.9436	0.0172	0.003	1.55e-08	7.1	0.3104	1.13188e+06
rs9597907	13	59496462	T	C	0.0738	0.0152	0.0027	1.56e-08	10	0.2468	1.13108e+06
rs11155813	6	152149435	T	C	0.8937	-0.0129	0.0023	1.57e-08	7.1	0.3123	1127698
rs214626	9	135718584	A	G	0.1894	0.0101	0.0018	1.58e-08	0	0.4814	1.13108e+06
rs1220779	7	54734673	A	G	0.4679	-0.0079	0.0014	1.58e-08	0	0.6915	1.13188e+06
rs4981245	14	35088635	A	T	0.5687	0.008	0.0014	1.58e-08	0	0.6341	1.13188e+06
rs9926649	16	66750040	T	G	0.0528	0.0177	0.0031	1.58e-08	19.5	0.0859	1128651
rs10748841	10	104996309	A	G	0.6725	-0.0111	0.002	1.58e-08	20.8	0.0779	651575
rs347661	5	62549141	T	C	0.4347	-0.0081	0.0014	1.58e-08	34.8	0.0037	1116306
rs10074178	5	93927705	A	G	0.5129	0.0079	0.0014	1.58e-08	4.8	0.3636	1.13108e+06
rs111370527	9	96203756	T	C	0.0785	0.0151	0.0027	1.61e-08	0	0.5716	1.07722e+06
rs1392816	1	66481188	T	C	0.3831	0.0082	0.0014	1.61e-08	1	0.4541	1.13017e+06
rs111530150	13	54342123	T	C	0.0228	0.0269	0.0048	1.62e-08	0	0.9881	1.09964e+06
rs2098526	2	162845276	A	G	0.0279	-0.0241	0.0043	1.62e-08	12.2	0.206	1.12958e+06
rs4735297	8	95589340	A	G	0.6741	-0.0086	0.0015	1.62e-08	0	0.653	1094453
rs4793090	17	40686342	A	G	0.6635	0.0084	0.0015	1.67e-08	0	0.7778	1131881
rs13016316	2	225337188	A	C	0.0908	-0.0138	0.0024	1.67e-08	0	0.8364	1.13006e+06
rs72919450	2	81999568	T	C	0.0997	-0.0132	0.0023	1.67e-08	0.8	0.4577	1.13188e+06
rs78648104	6	50683009	T	C	0.9137	-0.0141	0.0025	1.7e-08	0	0.8593	1125496
rs6792805	3	118675196	A	G	0.7356	-0.009	0.0016	1.7e-08	23	0.0483	1.13006e+06
rs7899270	10	111258134	A	C	0.6524	-0.0084	0.0015	1.74e-08	2.6	0.4171	1116832
rs11190955	10	103112165	T	C	0.354	-0.0083	0.0015	1.74e-08	24.3	0.0387	1131084
rs142014757	18	77511268	A	G	0.8085	0.0102	0.0018	1.74e-08	0	0.648	1.09273e+06
rs73039077	3	17036387	C	G	0.2471	0.0092	0.0016	1.75e-08	0	0.6053	1.11364e+06
rs13266287	8	17871598	A	T	0.6687	-0.0085	0.0015	1.75e-08	9.2	0.2641	1.09445e+06
rs7223311	17	78940614	C	G	0.5169	-0.0079	0.0014	1.77e-08	0	0.4914	1.12139e+06
rs34967082	2	215382654	A	G	0.4161	-0.008	0.0014	1.77e-08	0	0.8962	1.13017e+06
rs62007304	15	77723195	A	C	0.9753	0.0264	0.0047	1.8e-08	0	0.6988	1050602
rs9291437	4	22165255	C	G	0.3907	-0.0081	0.0014	1.82e-08	0	0.6364	1131881
rs13361043	5	58318963	T	C	0.9329	-0.0158	0.0028	1.84e-08	17.4	0.1118	1.13108e+06
rs76167224	12	56507702	T	C	0.9487	-0.0187	0.0033	1.88e-08	36.4	0.0145	1031668
rs12953422	18	31192529	A	G	0.5847	-0.008	0.0014	1.89e-08	0	0.635	1131881
rs57016874	2	220310112	T	C	0.0387	0.0209	0.0037	1.9e-08	33.3	0.0109	1.08696e+06
rs2183271	10	21957229	T	C	0.6364	0.0084	0.0015	1.91e-08	0	0.5544	1.08271e+06
rs72824753	6	14619148	T	C	0.9005	0.0133	0.0024	1.93e-08	4.8	0.365	1115196
rs34624793	2	144916804	T	C	0.8636	0.0116	0.0021	1.94e-08	0	0.7943	1104914
rs138096147	3	48179876	A	G	0.0323	0.0234	0.0042	1.95e-08	0	0.712	1.02183e+06
rs11191237	10	103949787	T	C	0.2225	0.0132	0.0024	1.96e-08	7	0.3282	580282
rs73219806	8	26279173	A	C	0.1683	0.0106	0.0019	1.97e-08	0	0.8356	1.11606e+06
rs6946136	7	135423424	A	G	0.6116	0.0081	0.0014	1.99e-08	10.3	0.2379	1131881
rs17170519	7	32861230	C	G	0.8991	0.0132	0.0023	1.99e-08	0	0.4929	1115995
rs113205706	7	39246987	A	G	0.0944	-0.0135	0.0024	2e-08	1.7	0.4369	1.13188e+06
rs1196760	12	105606068	C	G	0.9105	0.0139	0.0025	2e-08	0	0.5659	1.11765e+06
rs7766240	6	16954368	T	C	0.0964	-0.0134	0.0024	2e-08	10.3	0.2422	1.12847e+06
rs17069646	5	167452251	T	C	0.6881	0.0085	0.0015	2.01e-08	0	0.5486	1131084
rs13169187	5	51716957	A	G	0.5374	-0.0079	0.0014	2.01e-08	0	0.5554	1131084
rs117677995	11	133772904	A	C	0.0535	-0.018	0.0032	2.03e-08	6.3	0.352	1.06478e+06
rs72709560	4	178540163	A	G	0.6865	0.0085	0.0015	2.03e-08	4.2	0.3791	1130168
rs322744	7	127780401	T	C	0.2609	-0.009	0.0016	2.04e-08	0	0.5178	1.11763e+06
rs61798586	4	36691695	A	C	0.1444	-0.0112	0.002	2.05e-08	0	0.58	1.13188e+06
rs10480450	7	108283606	A	G	0.9341	0.0158	0.0028	2.05e-08	18	0.1024	1.13188e+06
rs77826402	2	100251389	T	C	0.073	0.0151	0.0027	2.05e-08	0	0.4979	1.13134e+06
rs10192834	2	207725616	T	C	0.655	0.0083	0.0015	2.05e-08	9.4	0.2599	1117629
rs16958559	17	55659233	T	G	0.7865	0.0096	0.0017	2.07e-08	6.5	0.3266	1124466
rs10789285	1	69788482	T	G	0.7542	0.0091	0.0016	2.07e-08	0	0.6787	1.13188e+06
rs2416214	5	108943485	A	C	0.4367	0.0079	0.0014	2.09e-08	14	0.1687	1129371
rs710629	12	67697856	A	G	0.645	0.0082	0.0015	2.09e-08	4.2	0.3785	1131881
rs11733439	4	30534692	A	G	0.7883	-0.0096	0.0017	2.1e-08	0	0.9155	1.13188e+06
rs73034295	11	133822133	A	G	0.2016	0.0099	0.0018	2.11e-08	0	0.9174	1117629
rs6543810	2	34380023	T	C	0.3771	0.0082	0.0015	2.11e-08	0	0.5825	1095250
rs10927053	1	243811321	A	T	0.8886	-0.0125	0.0022	2.13e-08	0	0.7782	1.12591e+06
rs11265191	1	159400359	T	C	0.3346	0.0083	0.0015	2.14e-08	0	0.5681	1131881
rs80037907	8	87170913	T	C	0.1589	-0.0107	0.0019	2.16e-08	7.3	0.3065	1.13108e+06
rs1075228	7	104520528	A	T	0.4257	-0.0081	0.0014	2.18e-08	0	0.5976	1091104
rs17650634	2	139420392	T	C	0.8287	-0.0104	0.0019	2.19e-08	17.8	0.1109	1.12527e+06
rs190102446	18	57048571	T	C	0.0364	-0.021	0.0037	2.19e-08	0	0.5903	1.13188e+06
rs11596387	10	103606122	T	G	0.0246	0.0258	0.0046	2.2e-08	0	0.6291	1.08908e+06
rs11210228	1	73859290	T	G	0.4356	-0.0105	0.0019	2.2e-08	16.3	0.1408	638120
rs111235962	1	20871750	T	C	0.0962	0.0133	0.0024	2.21e-08	13.8	0.1724	1.13097e+06
rs870589	17	31614454	A	T	0.4595	-0.0079	0.0014	2.24e-08	0	0.9934	1.12233e+06
rs11591870	10	65494036	T	C	0.798	0.0098	0.0017	2.25e-08	3.5	0.3958	1131084
rs1955250	4	118514236	A	C	0.9137	-0.014	0.0025	2.26e-08	0	0.9608	1.13188e+06
rs1747817	1	197711492	T	C	0.7614	-0.0092	0.0016	2.29e-08	0	0.9572	1.13017e+06
rs9611597	22	41864190	A	T	0.835	-0.0107	0.0019	2.3e-08	16.4	0.144	1.10193e+06
rs10949263	6	14886977	A	G	0.2443	-0.0091	0.0016	2.33e-08	0	0.5808	1.13188e+06
rs7965154	12	23697725	A	C	0.3062	-0.0085	0.0015	2.33e-08	12.5	0.194	1131881
rs113720505	13	57477706	A	G	0.0659	0.0164	0.0029	2.34e-08	21	0.1207	1.05189e+06
rs399821	3	21500324	A	G	0.5321	-0.0078	0.0014	2.34e-08	15.4	0.1421	1131881
rs60726488	10	110882068	T	C	0.2561	-0.009	0.0016	2.35e-08	20.2	0.0788	1.12694e+06
rs113731629	4	170984229	T	C	0.9859	0.0339	0.0061	2.36e-08	0	0.8937	1.08734e+06
rs10192369	2	161380888	A	G	0.496	-0.0078	0.0014	2.36e-08	0	0.9192	1126917
rs78702390	7	68618770	C	G	0.0583	0.0167	0.003	2.38e-08	13.1	0.1881	1.12831e+06
rs1861786	12	14000467	A	G	0.3813	-0.0081	0.0014	2.39e-08	1.3	0.447	1131881
rs884108	1	204591237	A	G	0.222	-0.0094	0.0017	2.39e-08	15.2	0.1458	1.13134e+06
rs17440885	1	67208622	A	G	0.9352	0.016	0.0029	2.42e-08	0	0.6863	1.11244e+06
rs1006749	20	41716653	A	G	0.5237	0.0079	0.0014	2.43e-08	7	0.3153	1.1152e+06
rs11845781	14	89276431	T	C	0.5552	-0.0079	0.0014	2.43e-08	20.6	0.0702	1131881
rs2092248	6	19205458	T	C	0.331	-0.0083	0.0015	2.43e-08	0	0.9428	1127191
rs7218235	17	2564267	A	G	0.2135	-0.0097	0.0017	2.44e-08	0	0.9215	1.08979e+06
rs317050	4	35446302	T	C	0.5048	0.0078	0.0014	2.5e-08	24.7	0.0345	1.13188e+06
rs113552169	5	60644403	C	G	0.9816	0.0294	0.0053	2.51e-08	0.1	0.4735	1.10902e+06
rs4255791	16	28274804	A	G	0.3301	-0.0084	0.0015	2.51e-08	0	0.5318	1103461
rs8030487	15	97119595	A	G	0.6907	0.0085	0.0015	2.52e-08	18	0.106	1126705
rs66482320	21	42688931	C	G	0.888	0.0124	0.0022	2.57e-08	18.7	0.0936	1.13108e+06
rs13168136	5	26898629	A	G	0.7668	-0.0092	0.0017	2.57e-08	21.6	0.0621	1130540
rs11720985	3	122214045	T	C	0.306	0.0085	0.0015	2.57e-08	0	0.4946	1130168
rs4925065	17	19914546	T	C	0.5214	-0.0078	0.0014	2.59e-08	12.3	0.1973	1.13188e+06
rs10251438	7	137006969	A	C	0.4955	0.0078	0.0014	2.65e-08	0	0.6983	1.13188e+06
rs11213482	11	110435636	A	G	0.836	-0.0106	0.0019	2.68e-08	0	0.5167	1107476
rs1518890	3	34271042	T	C	0.2542	-0.009	0.0016	2.68e-08	21.4	0.0615	1.13188e+06
rs8192465	7	99566007	A	G	0.0218	-0.0272	0.0049	2.69e-08	0	0.8566	1.09446e+06
rs7561705	2	143446472	A	G	0.472	0.0078	0.0014	2.71e-08	23.3	0.0469	1130186
rs7226824	18	27676827	T	C	0.5305	-0.0078	0.0014	2.72e-08	13.9	0.1683	1131881
rs7875078	9	14494845	A	C	0.4564	-0.0078	0.0014	2.72e-08	0	0.6086	1129371
rs1905616	8	93235675	A	G	0.327	0.0083	0.0015	2.74e-08	15.8	0.1389	1127815
rs6736025	2	58797634	T	G	0.4354	0.0079	0.0014	2.77e-08	0	0.5812	1131881
rs11640569	16	48791392	A	G	0.142	0.0112	0.002	2.77e-08	0	0.5554	1.13108e+06
rs7630133	3	123923288	A	G	0.6553	0.0082	0.0015	2.8e-08	0	0.605	1131337
rs6567288	18	60218334	A	G	0.5719	-0.0079	0.0014	2.81e-08	0	0.7696	1.13188e+06
rs9633970	11	132502212	T	C	0.7606	0.0091	0.0016	2.81e-08	0	0.747	1.13097e+06
rs6706275	2	240265617	T	C	0.3246	0.0083	0.0015	2.81e-08	0	0.5134	1131084
rs2989751	9	96366647	A	G	0.244	-0.0092	0.0017	2.89e-08	0	0.871	1094453
rs34309	5	67564383	A	G	0.3816	0.008	0.0014	2.94e-08	12.8	0.1901	1131084
rs72972965	2	140454376	A	C	0.3496	0.0083	0.0015	2.94e-08	0	0.8388	1095250
rs12765185	10	134977077	A	T	0.2769	-0.0088	0.0016	2.96e-08	0	0.8045	1.11317e+06
rs115438240	2	185883877	T	G	0.9435	-0.0169	0.003	2.96e-08	20.6	0.0746	1.12775e+06
rs2718277	7	74133929	T	C	0.0832	0.0142	0.0026	2.99e-08	8.6	0.283	1110123
rs4938815	11	120441647	T	G	0.7041	0.0085	0.0015	2.99e-08	6.6	0.3219	1130168
rs7716161	5	72179574	C	G	0.1696	0.0105	0.0019	3e-08	0	0.6107	1.09445e+06
rs1368250	2	157485517	T	C	0.0284	0.025	0.0045	3e-08	0	0.5616	988477
rs10122669	9	116555771	A	G	0.4143	-0.0079	0.0014	3e-08	15	0.153	1128827
rs12574281	11	131205421	A	C	0.631	-0.008	0.0015	3.04e-08	8.1	0.2864	1131881
rs9300612	13	101283219	T	C	0.6944	0.0084	0.0015	3.07e-08	8.7	0.2742	1.13108e+06
rs9442750	6	72886012	A	G	0.7439	-0.0089	0.0016	3.15e-08	29.7	0.0116	1.13188e+06
rs2299156	7	50764404	T	C	0.189	0.0099	0.0018	3.15e-08	0	0.8892	1.13188e+06
rs2082317	4	171824549	T	C	0.5301	-0.0078	0.0014	3.19e-08	0	0.4963	1126917
rs6091570	20	51299884	A	G	0.3491	0.0081	0.0015	3.2e-08	0	0.9023	1131881
rs57661533	12	78629917	T	C	0.1341	-0.0114	0.0021	3.24e-08	0	0.7446	1.13005e+06
rs2736752	3	60817322	T	G	0.7869	0.0095	0.0017	3.24e-08	0	0.7673	1.11637e+06
rs114192810	4	17969142	T	G	0.9801	-0.0279	0.0051	3.26e-08	10.8	0.2433	1117776
rs1051860	14	58838668	A	G	0.4071	-0.0079	0.0014	3.29e-08	0	0.4942	1131337
rs6689641	1	110720400	A	G	0.4556	0.0078	0.0014	3.29e-08	13.4	0.18	1117629
rs10181071	2	142862830	A	G	0.8265	0.0102	0.0019	3.31e-08	0	0.8707	1.13188e+06
rs78116078	1	18434125	C	G	0.718	0.0086	0.0016	3.33e-08	0	0.9445	1131881
rs4846010	1	11531059	A	G	0.2128	0.0099	0.0018	3.35e-08	5.1	0.3765	1.04332e+06
rs925161	4	112323249	C	G	0.48	-0.0078	0.0014	3.38e-08	14.3	0.1614	1130168
rs2994326	1	243651026	T	C	0.1852	-0.01	0.0018	3.38e-08	0	0.5995	1.1152e+06
rs10032941	4	15402115	T	C	0.6365	-0.008	0.0015	3.42e-08	7.8	0.2925	1.13188e+06
rs11663678	18	42908726	T	C	0.8842	-0.0121	0.0022	3.42e-08	0	0.9891	1.13097e+06
rs10940540	5	56677646	A	T	0.5522	0.0078	0.0014	3.44e-08	0	0.841	1129371
rs2958182	18	53149021	A	T	0.3414	0.0082	0.0015	3.46e-08	0	0.491	1.13188e+06
rs2276209	18	36942457	A	C	0.704	0.0085	0.0015	3.49e-08	6.3	0.3273	1131881
rs117668569	7	112816099	T	G	0.9718	0.0234	0.0042	3.49e-08	0	0.693	1.12895e+06
rs4724083	7	42007071	T	C	0.3227	0.0083	0.0015	3.53e-08	0	0.9123	1.12762e+06
rs62409395	4	25605036	T	C	0.7755	0.0101	0.0018	3.55e-08	24.9	0.1362	955837
rs10983324	9	119485337	A	C	0.3041	0.0084	0.0015	3.55e-08	26	0.0284	1129371
rs12473986	2	173682948	T	C	0.2907	-0.0085	0.0015	3.57e-08	0.1	0.4752	1.13188e+06
rs72881110	2	44754020	A	T	0.0753	0.0146	0.0027	3.59e-08	0	0.6997	1.13188e+06
rs10509251	10	67828436	T	C	0.22	-0.0093	0.0017	3.61e-08	6.7	0.3206	1129371
rs1995181	12	24195048	A	T	0.4598	-0.0078	0.0014	3.61e-08	5.2	0.354	1.13188e+06
rs77370942	13	58037032	A	G	0.0751	-0.0147	0.0027	3.65e-08	0	0.7892	1.12731e+06
rs74615093	16	69122043	A	G	0.0772	0.0145	0.0026	3.67e-08	0	0.5064	1130540
rs4850954	2	101573214	T	C	0.4628	0.0077	0.0014	3.73e-08	5.2	0.3544	1.12936e+06
rs2989476	1	61059259	C	G	0.4193	0.0078	0.0014	3.73e-08	0	0.7482	1131881
rs36120534	20	17438121	T	C	0.1811	0.01	0.0018	3.77e-08	8.3	0.2822	1.13188e+06
rs35192107	5	145705669	T	G	0.7621	-0.0091	0.0017	3.77e-08	29.2	0.0153	1.112e+06
rs10264573	7	1944591	A	G	0.9446	0.0175	0.0032	3.79e-08	0	0.9753	1.04612e+06
rs7796103	7	41820155	C	G	0.5168	-0.0077	0.0014	3.81e-08	0	0.5462	1.13017e+06
rs628993	11	61539691	A	G	0.1073	0.0128	0.0023	3.83e-08	7.1	0.3344	1.06856e+06
rs3809169	12	113911532	T	C	0.9128	0.014	0.0025	3.85e-08	24.4	0.0438	1.0774e+06
rs62506104	8	31020008	A	G	0.1923	-0.0098	0.0018	3.93e-08	13.6	0.1738	1131084
rs911149	20	58214637	T	C	0.2357	0.0091	0.0017	3.93e-08	0	0.6118	1131881
rs10810145	9	14430692	A	G	0.4144	0.0078	0.0014	4e-08	0	0.6036	1131084
rs7823700	8	42363231	T	C	0.0987	0.0132	0.0024	4e-08	0	0.6685	1.07882e+06
rs663251	1	70566021	T	G	0.6532	0.0081	0.0015	4.02e-08	0	0.6037	1131881
rs1445591	1	72960011	A	G	0.6986	0.0085	0.0015	4.02e-08	22.8	0.055	1112759
rs2718791	3	180931395	T	C	0.6452	-0.0081	0.0015	4.02e-08	22	0.0584	1127735
rs10128888	12	97799524	A	G	0.3149	-0.0083	0.0015	4.04e-08	0	0.7606	1130168
rs17732878	17	7362359	T	C	0.7912	-0.0095	0.0017	4.06e-08	2	0.43	1.13188e+06
rs191903670	3	48578053	A	T	0.9836	0.0335	0.0061	4.08e-08	0	0.7313	924757
rs6881733	5	92586991	T	C	0.287	-0.0086	0.0016	4.08e-08	16.6	0.1259	1118545
rs10799615	1	20541370	A	G	0.2525	-0.0089	0.0016	4.11e-08	0	0.7559	1.13188e+06
rs3817923	1	171809211	A	G	0.1133	-0.0121	0.0022	4.11e-08	6.2	0.3315	1130168
rs853286	3	64285502	T	G	0.8921	0.0124	0.0023	4.13e-08	0	0.6658	1.13188e+06
rs163229	2	45157163	C	G	0.9775	-0.026	0.0047	4.13e-08	26.7	0.0274	1.12931e+06
rs59813324	12	60879673	T	G	0.1983	0.0097	0.0018	4.15e-08	0	0.5072	1130168
rs2521602	17	42336424	A	G	0.0219	-0.0266	0.0049	4.17e-08	19.5	0.1169	1100811
rs2416845	9	124755432	T	C	0.9775	0.0263	0.0048	4.19e-08	8.9	0.2846	1.10018e+06
rs11592299	10	104225941	A	G	0.1958	0.0097	0.0018	4.19e-08	8.4	0.2812	1.13108e+06
rs9877225	3	70631590	T	C	0.7617	0.009	0.0016	4.22e-08	22.3	0.0536	1.13188e+06
rs1146079	12	62485472	C	G	0.7373	-0.0087	0.0016	4.24e-08	0	0.7713	1.13188e+06
rs10886012	10	118550021	C	G	0.5663	0.0078	0.0014	4.24e-08	5.1	0.3562	1131084
rs78918150	2	117611525	T	C	0.6227	-0.008	0.0015	4.26e-08	10.1	0.2446	1.11752e+06
rs10995639	10	65573195	T	C	0.4199	0.0078	0.0014	4.26e-08	6.8	0.3181	1131084
rs11076962	16	5811367	T	C	0.7189	0.0086	0.0016	4.29e-08	0	0.8411	1.13017e+06
rs9492774	6	131302489	C	G	0.3692	0.008	0.0015	4.33e-08	16.8	0.1199	1131881
rs9446060	6	69552271	A	G	0.5566	0.0077	0.0014	4.33e-08	17	0.1162	1131881
rs116386746	2	61018515	C	G	0.0249	0.0249	0.0045	4.35e-08	0	0.4817	1.11282e+06
rs936496	13	36100541	A	G	0.6229	-0.0079	0.0014	4.38e-08	0	0.522	1131084
rs78365243	1	211737950	T	C	0.9513	0.0181	0.0033	4.38e-08	12.4	0.2093	1.10339e+06
rs67661275	11	132662671	A	G	0.9103	0.0134	0.0025	4.4e-08	11.6	0.211	1.13188e+06
rs1843815	1	98589715	A	T	0.4635	0.0077	0.0014	4.4e-08	0	0.9769	1.13188e+06
rs13050131	21	20018118	A	C	0.6647	-0.0081	0.0015	4.4e-08	0	0.9415	1131881
rs4263475	5	26774142	A	G	0.5814	0.0078	0.0014	4.4e-08	0	0.6356	1116832
rs10985402	9	124578782	T	G	0.2472	0.0089	0.0016	4.47e-08	0	0.5522	1.12865e+06
rs9821664	3	127003110	A	G	0.2105	0.0094	0.0017	4.52e-08	21.6	0.0615	1.13017e+06
rs2436760	6	40374288	T	C	0.9717	0.0232	0.0042	4.52e-08	0	0.6316	1124655
rs11657979	17	32900837	A	G	0.2449	-0.0091	0.0017	4.57e-08	0	0.6373	1097573
rs73154546	22	34271689	A	C	0.0401	0.0197	0.0036	4.57e-08	0	0.6368	1113050
rs143148393	14	84896824	T	G	0.035	-0.0211	0.0039	4.62e-08	22.7	0.0614	1.10574e+06
rs9844755	3	78440564	A	G	0.3354	0.0083	0.0015	4.64e-08	9.4	0.2615	1093537
rs13117856	4	174008759	A	T	0.7054	0.0084	0.0015	4.64e-08	0	0.9265	1131881
rs12238011	9	14210897	T	C	0.0809	-0.0141	0.0026	4.67e-08	0	0.6449	1.13108e+06
rs76957677	10	105030157	T	C	0.0192	-0.0297	0.0054	4.72e-08	15.9	0.2045	1.0022e+06
rs7672622	4	157705551	A	G	0.7459	-0.0088	0.0016	4.72e-08	0	0.7726	1.12774e+06
rs115017135	5	26896955	A	C	0.0409	-0.0206	0.0038	4.72e-08	0	0.7033	1.0015e+06
rs1898111	15	47892298	A	G	0.8245	0.0101	0.0018	4.72e-08	0	0.6241	1131084
rs2252098	20	51620301	T	C	0.4703	-0.0077	0.0014	4.74e-08	0	0.5782	1125800
rs58950082	7	53857821	T	C	0.7867	0.0095	0.0017	4.77e-08	0	0.5385	1.09525e+06
rs10402747	19	45815248	T	C	0.5175	0.0077	0.0014	4.79e-08	9.9	0.2543	1113501
rs56306882	3	70253693	A	G	0.2741	0.0086	0.0016	4.82e-08	9.1	0.2692	1.1152e+06
rs2569041	5	167510357	T	C	0.5421	0.0077	0.0014	4.85e-08	0	0.61	1129371
rs72672052	8	115798424	A	T	0.1753	-0.0101	0.0018	4.87e-08	0	0.9468	1.13108e+06
rs187951956	1	98412713	A	T	0.0154	-0.0315	0.0058	4.87e-08	0	0.8126	1.09893e+06
rs11647188	16	82648514	A	G	0.6066	0.0079	0.0014	4.92e-08	0	0.5467	1.12308e+06
rs73055556	3	28027538	A	G	0.1385	0.0111	0.002	4.95e-08	22.5	0.0562	1.12599e+06
rs2055940	4	46997913	A	G	0.3215	0.0082	0.0015	4.95e-08	13.5	0.1773	1.13017e+06
rs780569	1	4569436	A	T	0.7201	-0.0085	0.0016	4.98e-08	0	0.9806	1.13188e+06
Notes: Clumping of GWAS results was performed as described in the Supplementary Notes. SNPs are ordered by P-value. Chromosome (CHR) and base pair (BP) positions are reported for human genome build 37 (hg19). "Allele 1" is the allele whose estimated effect size (Beta) and allele frequency are reported. Standard errors (SE) and P-values are derived from test statistics that have been adjusted by a…

## Sheet: 3. EduYears COJO
Supplementary Table 3. Association results for the 765 SNPs that reached genome-wide significance (P < 5×10-8) in COJO Analysis of the pooled-sex EduYears analysis
SNP	Chr	Position	Allele 1	Frequency Allele 1	Effect size	SE	P-value	N	Highest R2 with primary SNP	LD pair SNP	Primary or secondary?
rs34394051	1	6853091	A	0.8429	-0.012	0.002	8.353e-10	1095220	3.212e-05	rs663251	primary
rs301793	1	8467534	T	0.1781	0.0158	0.0018	7.98e-18	1126200	0.0001616	rs1778904	primary
rs111235962	1	20871750	T	0.0962	0.013	0.0024	4.331e-08	1130940	0.0001453	rs10910953	primary
rs10753331	1	29164582	A	0.3236	-0.01	0.0015	2.443e-11	1131840	0.0001502	rs12406721	primary
rs12044095	1	32206556	A	0.0342	-0.0248	0.004	5.187e-10	1068460	0.0001757	rs12406721	primary
rs4949223	1	32221913	A	0.1307	-0.012	0.0021	1.014e-08	1118410	0.006302	rs12044095	secondary
rs12028010	1	41764471	T	0.7711	0.0165	0.0017	4.684e-23	1131790	8.684e-05	rs1778904	primary
rs3828150	1	44050856	T	0.214	-0.0153	0.0018	7.015e-17	1131730	0.000162	rs1778904	primary
rs3791033	1	44134077	T	0.6703	-0.0136	0.0016	1.935e-17	1131740	0.1288	rs3828150	secondary
rs1778904	1	44705388	C	0.3808	0.0102	0.0014	2.041e-12	1131840	0.0002292	rs635754	primary
rs11211123	1	45957609	A	0.2228	0.0107	0.0017	2.341e-10	1131850	0.0001293	rs1778904	primary
rs3131749	1	58249658	A	0.5829	0.0093	0.0014	7.954e-11	1130140	0.01129	rs2764684	primary
rs2764684	1	58537919	T	0.8266	0.0158	0.0019	2.295e-17	1129390	0.01129	rs3131749	primary
rs4915735	1	61808444	A	0.1408	0.0117	0.002	6.274e-09	1130140	4.341e-05	rs12750688	primary
rs55675587	1	66224881	T	0.1926	-0.0101	0.0018	1.58e-08	1131840	0.00291	rs72667460	primary
rs72667460	1	66536012	T	0.0539	0.0185	0.0031	3.056e-09	1128060	0.00291	rs55675587	primary
rs7552964	1	69331299	A	0.1013	0.0141	0.0023	1.248e-09	1131840	0.0002998	rs1024268	primary
rs1024268	1	70117404	T	0.4186	-0.0081	0.0014	1.056e-08	1131850	0.0006649	rs663251	primary
rs663251	1	70566021	T	0.6532	0.0085	0.0015	9.195e-09	1131850	0.001166	rs76659454	primary
rs34305371	1	72733610	A	0.0985	0.0284	0.0024	6.618e-32	1101970	0.02135	rs76659454	primary
rs76659454	1	72749726	A	0.1764	-0.0154	0.0019	1.665e-16	1131790	0.02135	rs34305371	primary
rs10789387	1	74560411	A	0.5379	0.0114	0.0014	6.529e-16	1131810	0.003962	rs76659454	primary
rs12726443	1	75616562	A	0.722	-0.0096	0.0016	1.557e-09	1119320	0.01612	rs145489304	secondary
rs145489304	1	75646472	A	0.0434	0.0251	0.0035	1.585e-12	1084670	0.003199	rs10789387	primary
rs7522356	1	77951460	T	0.4404	0.0087	0.0014	6.802e-10	1131850	4.689e-05	rs1778904	primary
rs12022666	1	91097495	A	0.3076	0.0096	0.0015	3.376e-10	1130130	0.0002771	rs12750688	primary
rs12089815	1	91189933	A	0.5418	0.0169	0.0014	3.429e-33	1130030	0.0001956	rs12022666	primary
rs4847401	1	93628013	C	0.3475	-0.0122	0.0015	1.562e-16	1131820	9.724e-05	rs4506495	primary
rs635754	1	96484940	A	0.5809	0.0121	0.0014	1.878e-17	1131820	0.00103	rs4506495	primary
rs4506495	1	98404234	T	0.8361	0.0174	0.0019	5.818e-20	1131800	0.004974	rs12750688	primary
rs12750688	1	98757620	C	0.7406	0.0114	0.0016	1.778e-12	1115150	0.004974	rs4506495	primary
rs12406721	1	107563243	T	0.3353	-0.0085	0.0015	1.167e-08	1127710	0.0002227	rs663251	primary
rs3738772	1	110048436	A	0.2932	0.0135	0.0015	2.417e-18	1131800	0.0001669	rs12406721	primary
rs7545139	1	110587956	A	0.5789	-0.0097	0.0014	9.452e-12	1131300	0.0007093	rs76577427	primary
rs76577427	1	110761099	C	0.9006	0.0212	0.0024	3.543e-19	1115120	0.0007093	rs7545139	primary
rs12024366	1	112158504	A	0.7671	0.0115	0.0017	4.382e-12	1131830	9.467e-05	rs3738772	primary
rs12746551	1	114374966	C	0.9689	0.0245	0.0041	2.317e-09	1099490	8.936e-05	rs76577427	primary
rs2458370	1	117874944	T	0.6409	-0.0086	0.0015	3.81e-09	1131850	7.034e-05	rs12750688	primary
rs61748951	1	156038058	A	0.0239	-0.0272	0.0048	1.64e-08	1031760	2.844e-05	rs145489304	primary
rs2249872	1	159146937	A	0.7433	0.0133	0.0016	1.199e-16	1131820	0.0001291	rs10789387	primary
rs10797055	1	159906849	A	0.5204	-0.0077	0.0014	4.544e-08	1111480	0.000124	rs1778904	secondary
rs12065238	1	166101602	A	0.1687	0.0103	0.0019	4.096e-08	1131860	0.0001247	rs10789387	secondary
rs35039375	1	171516863	A	0.9096	0.0182	0.0024	1.005e-13	1131030	0.000127	rs10910953	primary
rs2901785	1	174104743	A	0.4452	0.0086	0.0014	9.011e-10	1131850	0.0001959	rs12750688	primary
rs1570926	1	175849208	T	0.2818	-0.0106	0.0016	1.275e-11	1128310	0.0001434	rs8024	primary
rs10910953	1	181512453	T	0.2069	0.0134	0.0017	1.045e-14	1129390	0.000259	rs12750688	primary
rs11808675	1	184666494	A	0.5854	0.0094	0.0014	3.396e-11	1131840	4.885e-05	rs55675587	primary
rs1171040	1	190400984	A	0.7866	-0.011	0.0017	1.621e-10	1119310	8.031e-05	rs12406721	primary
rs1539414	1	197743506	A	0.212	-0.0116	0.0017	1.427e-11	1131840	0.008433	rs34780702	primary
rs34780702	1	197907554	A	0.7635	0.0099	0.0017	2.058e-09	1131840	0.008433	rs1539414	primary
rs8024	1	201845575	A	0.3294	-0.0115	0.0015	1.636e-14	1131820	0.0001594	rs12750688	primary
rs11588857	1	204587047	A	0.2131	0.0203	0.0017	1.564e-32	1131760	9.271e-05	rs12406721	primary
rs17189000	1	211549432	A	0.164	-0.0113	0.0019	2.674e-09	1131850	0.0009793	rs12568153	primary
rs34836421	1	212389597	C	0.1933	0.0098	0.0018	3.394e-08	1131850	0.0007935	rs12568153	primary
rs12568153	1	213151580	T	0.2902	-0.0086	0.0015	2.376e-08	1127700	0.0009793	rs17189000	primary
rs4846724	1	221967817	A	0.5347	0.0099	0.0014	2.344e-12	1131830	3.547e-05	rs8024	primary
rs12405889	1	235597252	T	0.489	-0.0098	0.0014	2.848e-12	1131830	3.196e-05	rs301793	primary
rs114593137	1	241876565	A	0.793	-0.0123	0.0017	1.373e-12	1129390	0.0001206	rs12750688	primary
rs3897821	1	243420388	A	0.6654	0.0156	0.0015	1.329e-25	1130070	0.0001163	rs2249872	primary
rs651529	1	244452911	A	0.5131	0.008	0.0014	2.005e-08	1096090	3.835e-05	rs1778904	primary
rs12614263	2	4123797	A	0.4959	0.0083	0.0014	3.335e-09	1131850	0.0002952	rs10189857	primary
rs7603132	2	4951548	A	0.1938	0.0138	0.0018	1.081e-14	1124490	5.758e-05	rs12614263	primary
rs76076331	2	10977585	T	0.1346	0.0205	0.0021	1.87e-23	1127600	9.304e-05	rs7309	primary
rs55826493	2	12836640	T	0.1216	-0.0129	0.0021	1.948e-09	1131850	7.508e-05	rs17742342	primary
rs9967813	2	16679863	T	0.2702	0.0102	0.0016	2.508e-10	1095210	6.112e-05	rs55826493	primary
rs312945	2	21328825	A	0.3051	-0.0091	0.0015	2.547e-09	1131850	8.745e-05	rs10189857	primary
rs4358081	2	29100642	A	0.5285	-0.0094	0.0014	1.833e-11	1131840	0.0007421	rs13029602	primary
rs13029602	2	29574875	T	0.6059	-0.0088	0.0014	8.714e-10	1131850	0.0007421	rs4358081	primary
rs6543810	2	34380023	T	0.3771	0.0081	0.0015	3.525e-08	1095220	0.0001211	rs6750081	primary
rs12468040	2	44854981	T	0.3819	0.0138	0.0014	1.1e-21	1131800	7.226e-05	rs939400	primary
rs61387839	2	48688635	A	0.695	0.0088	0.0015	1.104e-08	1115790	0.000163	rs10496091	primary
rs939400	2	50645890	T	0.3685	-0.01	0.0015	6.695e-12	1130020	0.001124	rs62140599	primary
rs62140599	2	51017478	A	0.7816	0.0141	0.0017	1.306e-16	1131810	0.00923	rs62142891	primary
rs62142891	2	51539113	A	0.2632	0.0102	0.0016	1.643e-10	1130130	0.00923	rs62140599	primary
rs13010288	2	51824512	T	0.1288	0.021	0.0021	1.282e-23	1131250	0.001531	rs62140599	primary
rs1437394	2	55582684	A	0.5732	0.0083	0.0014	4.99e-09	1131860	0.0002977	rs3948495	secondary
rs3948495	2	57383133	T	0.4079	-0.0083	0.0014	6.751e-09	1131840	0.008635	rs1106090	primary
rs1106090	2	58068741	A	0.6228	0.0086	0.0015	3.401e-09	1131850	0.008635	rs3948495	primary
rs7595950	2	60143192	T	0.4962	0.0094	0.0014	1.96e-11	1131850	0.0008075	rs10189857	primary
rs10189857	2	60713235	A	0.5654	0.0169	0.0014	9.299e-33	1131760	0.0008075	rs7595950	primary
rs10496091	2	61482261	A	0.2841	-0.0123	0.0016	2.839e-15	1131810	0.0004424	rs7595950	primary
rs268120	2	65604914	A	0.2503	0.012	0.0016	1.207e-13	1131830	6.078e-05	rs12614263	primary
rs6731373	2	68503044	A	0.339	-0.0118	0.0015	3.227e-15	1115850	0.0001227	rs1971218	primary
rs112806496	2	80421805	C	0.9129	-0.0198	0.0026	1.726e-14	1115160	0.0002242	rs9653442	primary
rs1348557	2	80647877	A	0.8855	0.0138	0.0023	1.25e-09	1130160	0.06267	rs112806496	secondary
rs183869217	2	81751340	C	0.9409	0.0168	0.003	1.754e-08	1130140	4.716e-05	rs73961845	primary
rs35751693	2	98242555	T	0.0348	-0.0232	0.004	7.17e-09	1029990	0.001533	rs72821122	primary
rs17023131	2	100406732	C	0.2648	0.0106	0.0016	4.102e-11	1130910	0.01852	rs9653442	primary
rs9653442	2	100825367	T	0.537	0.0189	0.0014	8.779e-40	1131720	0.02311	rs72821122	primary
rs72821122	2	100880775	T	0.8145	0.0215	0.0018	6.431e-32	1131790	0.02311	rs9653442	primary
rs10204051	2	103775435	T	0.4055	-0.0081	0.0015	2.421e-08	1123870	0.02951	rs2570497	primary
rs2570497	2	104441546	T	0.6367	-0.011	0.0015	1.247e-13	1131810	0.02951	rs10204051	primary
rs4851759	2	105971016	A	0.1221	-0.0157	0.0021	2.567e-13	1131830	0.0001886	rs73961845	primary
rs12712269	2	107564115	T	0.3962	-0.0108	0.0014	4.004e-14	1131830	7.792e-05	rs7595950	primary
rs13402497	2	115826318	A	0.4902	-0.0077	0.0014	4.264e-08	1130030	6.517e-05	rs16840719	primary
rs58996896	2	123735005	A	0.7388	-0.0094	0.0016	4.493e-09	1131860	0.0001248	rs61387839	primary
rs4848924	2	124991887	A	0.71	-0.0119	0.0015	1.443e-14	1131820	0.0005608	rs13010566	primary
rs13010566	2	125873208	A	0.4718	-0.0098	0.0014	3.985e-12	1131850	0.0005608	rs4848924	primary
rs13026611	2	128153335	A	0.3555	-0.0083	0.0015	1.483e-08	1130130	0.0001391	rs9653442	primary
rs17650634	2	139420392	T	0.8287	-0.0108	0.0019	9.668e-09	1125240	0.0008155	rs1464297	primary
rs344693	2	140124248	A	0.2382	-0.0109	0.0017	1.352e-10	1087890	0.01382	rs1464297	secondary
rs1464297	2	140653749	T	0.649	-0.0118	0.0015	1.801e-15	1131830	0.0008155	rs17650634	primary
rs74787922	2	141598681	A	0.9333	0.0189	0.0028	1.908e-11	1130150	0.001731	rs7597412	primary
rs7597412	2	142069014	C	0.3688	0.0086	0.0015	4.046e-09	1131860	0.001731	rs74787922	primary
rs60929679	2	142342656	T	0.9342	0.0252	0.0028	5.354e-19	1131820	0.0005876	rs74787922	primary
rs1320139	2	144158177	C	0.427	-0.0131	0.0014	6.664e-20	1131780	0.01649	rs73961845	primary
rs73961845	2	144478983	A	0.617	-0.01	0.0015	7.646e-12	1131830	0.01649	rs1320139	primary
rs1427298	2	145214421	T	0.4264	0.0094	0.0014	4.628e-11	1126150	0.005363	rs7575637	primary
rs7560871	2	145616899	A	0.0739	-0.0164	0.0027	2.325e-09	1131830	0.04328	rs7575637	primary
rs7575637	2	145796251	A	0.4538	0.01	0.0014	4.772e-12	1131820	0.04328	rs7560871	primary
rs17742342	2	148633936	A	0.802	-0.0122	0.0018	4.088e-12	1131840	0.000187	rs7597412	primary
rs6721495	2	152778185	T	0.2715	-0.0088	0.0016	3.025e-08	1117600	8.515e-05	rs17742342	primary
rs7584691	2	155480242	A	0.5293	0.0111	0.0014	2.854e-15	1131830	0.0003534	rs16840719	primary
rs16840719	2	157551242	T	0.2233	0.0111	0.0017	5.406e-11	1131840	0.0003534	rs7584691	primary
rs115278162	2	161334555	T	0.9775	-0.0288	0.0047	1.225e-09	1129540	0.002324	rs7309	primary
rs10930008	2	161854736	A	0.7399	-0.0094	0.0016	8.444e-09	1130130	0.02803	rs10221808	primary
rs7309	2	162092640	A	0.4861	-0.0172	0.0014	2.168e-33	1131750	0.009037	rs2098526	primary
rs10221808	2	162813807	A	0.6981	-0.0099	0.0016	2.586e-10	1131810	0.02803	rs10930008	primary
rs2098526	2	162845276	A	0.0279	-0.0249	0.0043	8.318e-09	1129550	0.0119	rs10221808	primary
rs12478449	2	164350434	T	0.6386	0.0106	0.0015	3.875e-13	1131290	0.0005945	rs10930008	primary
rs12477385	2	166144850	T	0.2264	0.011	0.0017	5.862e-11	1131840	0.0005772	rs12478449	primary
rs17428076	2	172851936	C	0.7598	0.0138	0.0016	4.574e-17	1131820	0.0001377	rs7597412	primary
rs12473986	2	173682948	T	0.2907	-0.0086	0.0015	2.303e-08	1131860	4.202e-05	rs7560871	primary
rs1093978	2	174156553	A	0.5615	-0.009	0.0014	1.826e-10	1126180	8.758e-05	rs61387839	primary
rs72915557	2	175199092	A	0.0581	-0.018	0.003	2.079e-09	1131310	9.223e-05	rs73961845	primary
rs6750081	2	180975856	A	0.3545	0.0096	0.0015	6.058e-11	1131290	0.0002157	rs1527878	primary
rs1527878	2	183446535	A	0.7566	-0.0104	0.0016	2.056e-10	1131840	0.0002157	rs6750081	primary
rs62174974	2	185053385	A	0.1949	-0.0109	0.0018	9.478e-10	1131850	0.0002738	rs12693403	primary
rs34481141	2	185607757	A	0.8497	-0.0108	0.002	3.731e-08	1131850	0.003554	rs12693403	secondary
rs12693403	2	186103275	C	0.5315	0.009	0.0014	2.628e-10	1095220	0.0002738	rs62174974	primary
rs62179650	2	189135884	A	0.2995	0.0117	0.0016	5.371e-14	1095190	0.0001929	rs12693403	primary
rs66721975	2	191701185	A	0.2903	-0.0087	0.0015	1.935e-08	1131850	0.000192	rs7309	primary
rs12693677	2	193840740	A	0.5218	-0.0102	0.0015	2.905e-12	1131800	0.08055	rs2245901	primary
rs2245901	2	194296294	A	0.3983	-0.0093	0.0015	4.136e-10	1130100	0.08055	rs12693677	primary
rs1455350	2	199497115	A	0.4862	-0.0144	0.0014	1.856e-24	1128230	0.0005725	rs1729412	primary
rs12693889	2	200473658	T	0.1764	-0.0115	0.0018	4.587e-10	1127600	0.002313	rs1729412	primary
rs1729412	2	201083598	T	0.4224	-0.0107	0.0014	5.038e-14	1131820	0.002313	rs12693889	primary
rs12623702	2	202885506	A	0.6171	0.0096	0.0014	2.997e-11	1130120	4.783e-05	rs6750081	primary
rs6435326	2	207002559	A	0.5148	-0.0091	0.0014	1.026e-10	1130140	0.0001361	rs1427298	primary
rs4132462	2	212635589	T	0.299	-0.0138	0.0015	3.786e-19	1119270	0.0001488	rs4851759	primary
rs10190431	2	215048212	T	0.5802	-0.0088	0.0014	5.702e-10	1131850	7.319e-05	rs57016874	primary
rs4673840	2	215363241	T	0.842	-0.0139	0.0019	4.806e-13	1131830	4.052e-05	rs62174974	primary
rs57016874	2	220310112	T	0.0387	0.0213	0.0037	9.091e-09	1086930	0.0003329	rs1971218	primary
rs1971218	2	221835288	A	0.5249	0.0083	0.0014	5.432e-09	1093500	0.0003767	rs73961845	primary
rs11687736	2	225405122	A	0.6764	-0.0108	0.0015	1.222e-12	1095210	0.0004068	rs2014896	primary
rs72964692	2	226082498	C	0.8138	-0.0099	0.0018	4.259e-08	1130140	0.005669	rs2014896	secondary
rs2014896	2	226530275	T	0.6856	0.0105	0.0015	5.065e-12	1131850	0.0004068	rs11687736	primary
rs4500930	2	228985505	T	0.3449	-0.0109	0.0015	1.759e-13	1131830	9.959e-05	rs13026611	primary
rs2091513	2	229168389	T	0.8399	-0.0129	0.0019	1.779e-11	1131840	9.566e-05	rs7584691	primary
rs6704768	2	233592501	A	0.5648	-0.0118	0.0014	7.887e-17	1130470	5.905e-05	rs58996896	primary
rs62190914	2	236788175	T	0.636	0.0089	0.0015	9.063e-10	1129340	0.000193	rs1971218	primary
rs72482130	2	237054356	T	0.8464	0.0142	0.0019	3.534e-13	1127770	0.0001402	rs1464297	primary
rs72993796	2	240321051	T	0.8836	0.013	0.0022	4.866e-09	1098080	0.000117	rs73961845	primary
rs13388333	2	242400597	A	0.6337	0.0087	0.0015	2.131e-09	1130500	0.0002108	rs73961845	primary
rs62236816	3	8252091	A	0.6431	-0.0106	0.0015	4.849e-13	1131830	0.0002156	rs686476	primary
rs382196	3	9145554	T	0.3814	-0.0081	0.0014	2.299e-08	1131840	3.29e-05	rs62236816	primary
rs14154	3	10368113	C	0.4795	-0.0077	0.0014	4.866e-08	1131860	9.111e-05	rs382196	secondary
rs6773869	3	16870340	A	0.6344	0.0122	0.0015	4.721e-17	1131810	4.422e-05	rs9820604	primary
rs6769567	3	20512961	T	0.5313	-0.0085	0.0014	1.502e-09	1131300	0.0006664	rs399821	primary
rs399821	3	21500324	A	0.5321	-0.0078	0.0014	2.762e-08	1131860	0.0006664	rs6769567	primary
rs13085461	3	24950387	C	0.474	0.0104	0.0014	1.569e-13	1131820	2.977e-05	rs66508963	primary
rs1518890	3	34271042	T	0.2542	-0.0088	0.0016	4.05e-08	1131850	1.459e-05	rs75017517	primary
rs4328757	3	36938180	T	0.6119	0.0097	0.0014	1.744e-11	1129580	4.925e-05	rs34031601	primary
rs62262084	3	47653822	T	0.2487	-0.0127	0.0017	2.323e-14	1119270	0.006395	rs112634398	primary
rs9859556	3	49455986	T	0.3132	0.021	0.0016	2.027e-37	1131520	0.01712	rs112634398	primary
rs11712056	3	49914397	T	0.5638	0.0169	0.0016	2.348e-26	1131540	0.1468	rs9859556	secondary
rs112634398	3	50075494	A	0.9514	0.0223	0.0035	1.326e-10	1072040	0.01712	rs9859556	primary
rs36051354	3	52986012	T	0.6785	0.0093	0.0015	1.114e-09	1131850	0.01043	rs62252819	secondary
rs62252819	3	53440128	A	0.7522	-0.0099	0.0017	2.791e-09	1093510	0.002723	rs62262084	primary
rs3774605	3	53830767	A	0.351	-0.0089	0.0015	1.393e-09	1131850	0.0003429	rs62262084	primary
rs9827472	3	56726646	T	0.3601	-0.0088	0.0015	1.936e-09	1131840	0.0001218	rs2290601	primary
rs2736750	3	60816908	A	0.7878	0.0097	0.0017	1.875e-08	1116340	0.000145	rs62252819	secondary
rs75645041	3	62553028	C	0.8429	0.0109	0.0019	2.157e-08	1111910	0.0001472	rs686476	primary
rs930530	3	64428492	T	0.5016	0.009	0.0014	1.569e-10	1130130	0.0001452	rs686476	primary
rs56841534	3	65482745	A	0.6359	0.0086	0.0015	3.077e-09	1131860	0.0002939	rs77554090	primary
rs77554090	3	65711935	T	0.0731	-0.0192	0.0027	1.506e-12	1118410	0.0002939	rs56841534	primary
rs75017517	3	67423510	A	0.1361	-0.0122	0.0021	3.628e-09	1114360	0.0005419	rs9849884	primary
rs9849884	3	68869923	A	0.5836	-0.0088	0.0014	6.543e-10	1131300	0.001574	rs115000530	primary
rs115000530	3	69930625	A	0.9451	-0.024	0.0031	1.616e-14	1103720	0.001574	rs9849884	primary
rs4974291	3	70511919	T	0.7598	-0.0106	0.0016	9.56e-11	1131060	9.034e-05	rs35483362	primary
rs35483362	3	71531467	T	0.5219	-0.0137	0.0014	2.53e-22	1131790	0.0003471	rs9849884	primary
rs9820604	3	72363674	T	0.8254	0.0113	0.0018	1.177e-09	1130130	0.0002161	rs9849884	primary
rs1918394	3	74903904	T	0.1658	0.0118	0.0019	3.66e-10	1131850	4.161e-05	rs6440008	primary
rs112379405	3	76230061	C	0.5502	-0.0083	0.0014	3.215e-09	1131840	6.448e-05	rs35483362	primary
rs9844755	3	78440564	A	0.3354	0.0085	0.0015	1.626e-08	1093510	0.0001328	rs66568921	secondary
rs13318986	3	82533639	A	0.3311	0.0113	0.0015	3.343e-14	1127660	0.00424	rs66568921	primary
rs66568921	3	85672018	T	0.6441	-0.0178	0.0015	1.296e-32	1095100	0.00424	rs13318986	primary
rs721778	3	103271449	T	0.7956	0.0127	0.0017	3.654e-13	1131830	0.0002617	rs686476	primary
rs2290601	3	108112760	T	0.772	-0.015	0.0017	2.743e-19	1131810	0.0001375	rs62252819	primary
rs34031601	3	116582908	T	0.2814	-0.0112	0.0016	8.193e-13	1131830	0.0003377	rs2088913	primary
rs9881096	3	117158450	T	0.5897	0.0081	0.0014	2.113e-08	1113360	0.0002872	rs34031601	primary
rs2088913	3	117310069	A	0.5732	0.0078	0.0014	4.157e-08	1130040	0.0003377	rs34031601	primary
rs13091704	3	118419383	A	0.2484	-0.0109	0.0016	2.303e-11	1130020	0.0003976	rs1920610	primary
rs66508963	3	122084529	A	0.8612	0.0122	0.002	2.202e-09	1124790	0.0003349	rs1920610	primary
rs1920610	3	123860565	T	0.6867	0.0097	0.0015	1.589e-10	1131300	0.0003976	rs13091704	primary
rs9289300	3	127144988	T	0.8412	-0.016	0.0019	7.509e-17	1131800	0.0004311	rs2929860	primary
rs2929860	3	128691941	T	0.1878	0.0109	0.0018	1.886e-09	1105120	0.0004311	rs9289300	primary
rs6440008	3	141154542	T	0.6205	-0.0091	0.0014	3.06e-10	1130140	0.0001772	rs9849884	primary
rs12054166	3	150093445	C	0.7399	0.0097	0.0016	1.127e-09	1131850	6.708e-05	rs13099165	primary
rs73874335	3	157933483	T	0.0607	-0.0174	0.0029	2.916e-09	1131300	0.0001162	rs399821	primary
rs7617204	3	160821969	A	0.5223	-0.0102	0.0014	4.176e-13	1131290	0.0001157	rs73874335	primary
rs893522	3	165560618	A	0.9112	0.0151	0.0025	9.856e-10	1131850	8.455e-05	rs7617204	primary
rs13099165	3	168740425	T	0.2029	-0.0122	0.0017	2.296e-12	1131300	0.0001739	rs686476	primary
rs1421418	3	173924058	T	0.2599	0.0092	0.0016	7.569e-09	1131850	4e-05	rs34031601	primary
rs57939424	3	175762095	A	0.2494	-0.0119	0.0016	2.311e-13	1127680	0.0001008	rs721778	primary
rs77025239	3	180734185	A	0.1559	-0.014	0.0019	3.97e-13	1129400	2.678e-05	rs56841534	primary
rs686476	3	182587666	T	0.3213	0.0089	0.0015	3.296e-09	1131850	0.0002617	rs721778	primary
rs80080062	3	185812169	C	0.867	0.012	0.0021	6.208e-09	1131850	3.955e-05	rs75645041	primary
rs73210523	3	196876600	A	0.1722	0.0122	0.0019	6.054e-11	1131840	8.17e-05	rs35483362	primary
rs150537577	4	705629	A	0.9195	-0.0154	0.0026	4.881e-09	1084990	8.725e-05	rs72709560	primary
rs9683585	4	2702804	C	0.5677	0.0082	0.0014	7.969e-09	1131850	0.001896	rs6824567	primary
rs6824567	4	2883172	T	0.2827	0.0109	0.0016	3.825e-12	1131810	0.01365	rs363096	primary
rs363096	4	3180021	T	0.4245	-0.0132	0.0014	1.85e-20	1131790	0.01365	rs6824567	primary
rs34654885	4	5232752	A	0.3362	0.0109	0.0015	2.108e-13	1130120	0.0001561	rs7698266	primary
rs2702576	4	15058245	A	0.3829	-0.0093	0.0014	1.129e-10	1131850	0.0002602	rs13133213	primary
rs13133213	4	15646794	A	0.498	0.01	0.0014	8.458e-13	1131850	0.0002602	rs2702576	primary
rs1980129	4	17045911	A	0.4738	0.0085	0.0014	1.575e-09	1131850	0.0001325	rs2011603	primary
rs2011603	4	18025484	A	0.7359	-0.009	0.0016	1.772e-08	1128190	0.0001325	rs1980129	primary
rs4697248	4	21931195	T	0.6664	0.0099	0.0015	3.476e-11	1119300	0.0001322	rs6839719	primary
rs11736863	4	23729566	A	0.1895	0.0144	0.0018	1.137e-15	1119280	8.24e-05	rs7688547	primary
rs6839719	4	28659854	T	0.8468	0.011	0.0019	1.432e-08	1131850	0.0003009	rs4358358	primary
rs4358358	4	30970822	A	0.6937	0.011	0.0015	6.204e-13	1131830	0.0003009	rs6839719	primary
rs868456	4	32150029	A	0.7117	0.0092	0.0015	3.275e-09	1131860	8.023e-05	rs4358358	primary
rs317050	4	35446302	T	0.5048	0.0078	0.0014	3.165e-08	1131850	8.551e-05	rs61798586	primary
rs61798586	4	36691695	A	0.1444	-0.0117	0.002	4.084e-09	1131850	0.0001524	rs72709560	primary
rs12510215	4	38591188	T	0.4992	0.0085	0.0014	1.638e-09	1131840	4.037e-05	rs17186106	primary
rs28450192	4	39699701	A	0.1854	-0.011	0.0018	2.871e-09	1082670	3.28e-05	rs17287504	primary
rs13130765	4	45163333	C	0.4721	-0.0087	0.0014	1.084e-09	1105590	5.657e-05	rs1505676	primary
rs1505676	4	62127291	C	0.6293	0.0082	0.0015	1.57e-08	1131850	5.657e-05	rs13130765	primary
rs988100	4	65900199	T	0.4496	0.009	0.0014	2.803e-10	1129600	0.01177	rs4458506	secondary
rs4458506	4	66452604	A	0.6705	-0.0104	0.0015	3.766e-12	1131850	0.002962	rs2318540	primary
rs11732160	4	67070824	A	0.7154	0.0106	0.0016	1.237e-11	1131830	0.005673	rs2318540	primary
rs2318540	4	67831581	T	0.4378	-0.0126	0.0014	6.383e-19	1131800	0.005673	rs11732160	primary
rs11733845	4	82211636	A	0.347	-0.0086	0.0015	4.536e-09	1131850	0.000294	rs7692359	primary
rs7692359	4	83209346	T	0.7786	-0.0107	0.0017	2.689e-10	1116870	0.000294	rs11733845	primary
rs17186106	4	91703241	T	0.1771	0.0113	0.0018	8.836e-10	1131850	0.0007448	rs12503522	primary
rs12503522	4	94543233	T	0.282	-0.0115	0.0016	1.701e-13	1131830	0.0007448	rs17186106	primary
rs13107325	4	103188709	T	0.0721	-0.0242	0.0027	8.093e-19	1113530	0.0001214	rs72709560	primary
rs2726518	4	106173199	A	0.4411	0.0142	0.0014	9.933e-24	1131800	0.0002153	rs11732160	primary
rs925161	4	112323249	C	0.48	-0.0077	0.0014	4.811e-08	1130130	6.198e-05	rs17287504	primary
rs1955250	4	118514236	A	0.9137	-0.0139	0.0025	2.743e-08	1131850	0.0001001	rs2726518	primary
rs13145650	4	122963344	T	0.917	-0.0171	0.0025	1.6e-11	1131840	3.609e-05	rs12646523	primary
rs10006235	4	130670108	T	0.2689	-0.009	0.0016	1.362e-08	1131300	5.166e-05	rs12646523	primary
rs7698266	4	137425467	A	0.6478	0.0095	0.0015	1.028e-10	1127700	0.0002326	rs1814701	primary
rs10519504	4	140640283	T	0.1561	0.0118	0.0019	1.162e-09	1131840	0.0003833	rs769662	primary
rs12643771	4	140753103	T	0.3094	0.0112	0.0015	4.087e-13	1130100	0.03318	rs769662	primary
rs769662	4	140868894	A	0.3736	0.0095	0.0015	9.394e-11	1131820	0.03318	rs12643771	primary
rs969512	4	147872742	A	0.6596	-0.0105	0.0015	1.142e-12	1131830	0.0001946	rs4358358	primary
rs17287504	4	159863382	T	0.2906	-0.0124	0.0015	1.264e-15	1131820	0.004051	rs4691601	primary
rs4691601	4	160599341	A	0.4571	-0.0111	0.0014	4.084e-15	1131820	0.004051	rs17287504	primary
rs195932	4	163558994	A	0.3563	0.0088	0.0015	1.629e-09	1131840	0.0002245	rs17287504	primary
rs4146926	4	164230788	C	0.7271	0.0087	0.0016	3.515e-08	1131850	0.0001773	rs17287504	secondary
rs4132378	4	166098547	T	0.8721	-0.0147	0.0021	2.953e-12	1130120	9.712e-05	rs195932	primary
rs12646523	4	170944698	T	0.2483	-0.0125	0.0016	1.259e-14	1131810	0.00306	rs7688547	primary
rs7688547	4	172502334	C	0.8176	-0.0121	0.0018	3.926e-11	1119290	0.00306	rs12646523	primary
rs1814701	4	176642438	T	0.4393	-0.0122	0.0014	6.455e-18	1129380	0.003775	rs4690423	primary
rs4690423	4	176966284	A	0.3675	-0.0109	0.0015	9.542e-14	1131840	0.003775	rs1814701	primary
rs72709560	4	178540163	A	0.6865	0.0087	0.0015	9.423e-09	1130140	0.000207	rs4358358	primary
rs1128956	4	183724005	T	0.8251	-0.0139	0.0019	1.051e-13	1107750	0.0001692	rs2726518	primary
rs11724690	4	186764747	T	0.2887	0.0093	0.0015	2.176e-09	1130130	8.977e-05	rs1814701	primary
rs13163845	5	3264389	T	0.8488	-0.0148	0.002	8.175e-14	1105190	0.001977	rs599673	primary
rs599673	5	3445351	C	0.7598	0.0091	0.0016	3.254e-08	1127700	0.001977	rs13163845	primary
rs75515594	5	7927332	T	0.0781	0.0149	0.0026	1.161e-08	1131850	0.0001313	rs4705763	primary
rs42271	5	11500251	A	0.5631	0.0091	0.0014	1.184e-10	1130510	6.612e-05	rs6449503	primary
rs75973558	5	26880925	A	0.8736	0.0164	0.0022	2.663e-14	1081280	0.0001286	rs353474	primary
rs4279348	5	30855212	A	0.3835	-0.009	0.0014	4.224e-10	1131040	0.0001134	rs10805383	primary
rs702606	5	53167117	T	0.8654	0.0116	0.0021	1.697e-08	1131050	2.764e-05	rs1960603	primary
rs7724301	5	57114080	T	0.7463	-0.0104	0.0016	1.135e-10	1129090	0.00153	rs6450476	primary
rs6450476	5	57771087	A	0.2929	-0.0107	0.0015	5.002e-12	1131030	0.00153	rs7724301	primary
rs1960603	5	59045193	C	0.2492	0.0099	0.0016	1.331e-09	1131040	0.004493	rs966221	primary
rs966221	5	59502520	A	0.4085	-0.0118	0.0014	1.567e-16	1131030	0.004493	rs1960603	primary
rs6449503	5	60095272	A	0.5038	0.017	0.0014	1.844e-33	1129200	0.002559	rs1960603	primary
rs10805383	5	63034606	A	0.4879	-0.0107	0.0014	3.306e-14	1131040	0.0002556	rs966221	primary
rs13190235	5	65964783	T	0.9036	-0.0131	0.0024	3.303e-08	1131050	9.987e-05	rs10057590	primary
rs10041403	5	67805272	T	0.8339	0.015	0.0019	2.485e-15	1118480	0.0001807	rs353474	primary
rs7716161	5	72179574	C	0.1696	0.0104	0.0019	4.203e-08	1094420	3.571e-05	rs13190235	primary
rs12653396	5	87847273	A	0.5597	-0.0116	0.0016	1.276e-13	1130960	0.1973	rs61104616	secondary
rs61104616	5	88163771	A	0.5249	-0.0129	0.0016	1.654e-16	1130940	0.0001204	rs115877304	primary
rs16868036	5	89230643	T	0.2908	-0.0093	0.0016	1.897e-09	1126930	0.00145	rs61104616	secondary
rs6556982	5	92201080	T	0.4007	-0.0108	0.0014	4.065e-14	1131030	0.0006226	rs115877304	primary
rs115877304	5	92797166	T	0.0427	0.0297	0.0036	7.711e-17	1077540	0.001279	rs1031389	primary
rs1031389	5	93918392	A	0.5125	0.0082	0.0014	4.542e-09	1131050	0.001279	rs115877304	primary
rs74944275	5	102726073	T	0.0433	0.0232	0.0035	3.312e-11	1095800	0.0001621	rs10057670	primary
rs10477835	5	103917539	A	0.3844	0.0104	0.0014	6.326e-13	1131040	0.0001652	rs406413	primary
rs10057670	5	104726662	T	0.4659	0.0077	0.0014	4.78e-08	1131050	0.0001646	rs6449503	primary
rs252991	5	106767346	A	0.3695	0.0092	0.0015	2.108e-10	1131040	0.0001099	rs10477835	primary
rs55754532	5	106965313	A	0.6005	-0.0103	0.0014	7.725e-13	1131030	0.0001875	rs353474	primary
rs13187428	5	109095545	T	0.6664	0.012	0.0015	7.556e-16	1131030	0.0001588	rs10057670	primary
rs4705763	5	112394503	C	0.5358	0.0089	0.0014	2.261e-10	1131050	0.0002071	rs353474	primary
rs406413	5	113898581	A	0.7898	0.0164	0.0017	1.612e-21	1131000	0.0001652	rs10477835	primary
rs62379838	5	120102028	T	0.6953	0.0118	0.0015	8.521e-15	1131030	0.0001663	rs10057590	primary
rs10057590	5	124335247	A	0.4724	0.0111	0.0014	2.931e-15	1129320	0.0001835	rs1960603	primary
rs329120	5	133861756	T	0.425	0.0087	0.0014	1.047e-09	1131050	2.322e-05	rs12519073	primary
rs1369127	5	136543488	A	0.1477	-0.0126	0.002	1.971e-10	1131040	0.008448	rs12519073	primary
rs12519073	5	136776762	T	0.2317	-0.0097	0.0017	5.559e-09	1131040	0.008448	rs1369127	primary
rs6881581	5	140946355	A	0.3278	-0.0094	0.0015	3.261e-10	1131050	0.0001371	rs6449503	primary
rs35192107	5	145705669	T	0.7621	-0.0093	0.0017	2.237e-08	1111960	0.0002047	rs353474	primary
rs12516990	5	145927688	C	0.2106	-0.0099	0.0017	8.786e-09	1131050	8.857e-05	rs966221	primary
rs2964255	5	152052332	A	0.3066	0.0086	0.0015	1.645e-08	1131050	0.001134	rs182902112	primary
rs182902112	5	153304758	A	0.0186	-0.0293	0.0053	2.775e-08	1099150	0.001134	rs2964255	primary
rs17069646	5	167452251	T	0.6881	0.0086	0.0015	1.356e-08	1131060	0.0002217	rs12659719	primary
rs12659719	5	167621049	T	0.5723	0.0085	0.0014	1.912e-09	1131040	0.0002217	rs17069646	primary
rs29792	5	168978148	A	0.3032	-0.0095	0.0015	4.219e-10	1131050	9.575e-05	rs10057590	primary
rs810496	5	170484975	A	0.3148	0.0083	0.0015	3.798e-08	1131050	9.971e-05	rs13187428	secondary
rs353474	5	176425281	A	0.4915	-0.008	0.0014	1.058e-08	1131060	0.00227	rs2731670	primary
rs2731670	5	176848019	A	0.4401	0.0119	0.0014	6.445e-17	1110710	0.00227	rs353474	primary
rs6596978	6	3468878	T	0.5121	0.0105	0.0014	8.841e-14	1131840	0.0002841	rs1487445	primary
rs13208248	6	12883524	A	0.306	-0.0085	0.0015	2.048e-08	1130150	0.000116	rs9357048	secondary
rs9370774	6	14721897	T	0.8056	-0.0153	0.0018	8.339e-18	1124320	0.0002397	rs6596978	primary
rs909788	6	16636461	T	0.4322	0.0078	0.0014	3.527e-08	1131310	0.0001736	rs1322537	primary
rs72829857	6	16966052	A	0.761	-0.0151	0.0016	6.195e-20	1130090	0.0001051	rs1322537	primary
rs9367942	6	17127706	A	0.1387	0.0114	0.002	2.268e-08	1116790	0.001012	rs72829857	secondary
rs1322537	6	19023726	T	0.8277	-0.0172	0.0019	2.406e-20	1131800	0.0002538	rs9465509	primary
rs9465509	6	19744129	A	0.4824	-0.0085	0.0014	1.234e-09	1131850	0.0002538	rs1322537	primary
rs2022330	6	23446555	A	0.7169	0.0114	0.0016	2.942e-13	1131830	0.0001454	rs9357048	primary
rs9467804	6	26583129	T	0.4768	-0.0115	0.0014	3.883e-16	1130090	0.003082	rs2256965	primary
rs9357048	6	27747042	A	0.9218	0.0155	0.0026	3.531e-09	1129480	0.002913	rs9467804	primary
rs2256965	6	31555130	A	0.4188	0.0112	0.0014	1.015e-14	1099210	0.003082	rs9467804	primary
rs12211410	6	32049423	T	0.085	-0.0185	0.0025	2.465e-13	1126950	0.002024	rs1061801	primary
rs1061801	6	33282338	A	0.187	-0.0104	0.0018	1.148e-08	1122570	0.005593	rs942642	primary
rs942642	6	33654897	T	0.3139	-0.0088	0.0015	8.082e-09	1130130	0.005593	rs1061801	primary
rs6457996	6	37527673	T	0.5195	0.0079	0.0014	2.152e-08	1131840	0.0001005	rs6557171	primary
rs3800283	6	41558358	A	0.6802	0.0083	0.0015	2.937e-08	1130140	0.000153	rs13219424	primary
rs78648104	6	50683009	T	0.9137	-0.0141	0.0025	2.023e-08	1125470	0.000169	rs9454297	primary
rs7449561	6	66215549	A	0.226	0.0103	0.0017	7.039e-10	1131850	0.0002155	rs9454297	primary
rs9454297	6	68514111	A	0.4766	0.0079	0.0014	2.326e-08	1131310	0.0002319	rs9370774	primary
rs10806133	6	79316230	T	0.5495	-0.0079	0.0014	2.55e-08	1129900	7.364e-05	rs11759026	primary
rs4352658	6	88279872	T	0.081	-0.0189	0.0026	2.215e-13	1129400	1.871e-05	rs113588399	primary
rs9353834	6	92147358	C	0.7555	0.0105	0.0016	1.302e-10	1131850	0.001689	rs17686649	primary
rs17686649	6	93568527	T	0.2192	-0.0097	0.0017	1.297e-08	1131850	0.001689	rs9353834	primary
rs12215808	6	93851462	T	0.7287	-0.0097	0.0016	7.309e-10	1131840	0.001433	rs9353834	primary
rs9498925	6	96508389	T	0.4469	-0.0085	0.0014	1.44e-09	1130130	0.0008681	rs35104491	primary
rs35104491	6	97390463	A	0.1849	0.0122	0.0018	1.408e-11	1131830	0.0009228	rs4839712	primary
rs4839712	6	98210879	T	0.5461	-0.0084	0.0014	4.024e-09	1129580	0.01526	rs1487445	primary
rs1487445	6	98565211	T	0.4769	0.02	0.0014	2.6e-45	1129410	0.01526	rs4839712	primary
rs7775791	6	108090476	T	0.4055	-0.0078	0.0014	4.327e-08	1131860	7.021e-05	rs9357048	secondary
rs2615510	6	114213280	T	0.115	0.0157	0.0022	9.68e-13	1131840	0.0008566	rs10080647	primary
rs10080647	6	114742335	A	0.1405	0.0139	0.002	5.374e-12	1131840	0.0008566	rs2615510	primary
rs9488655	6	115739005	T	0.3422	-0.0082	0.0015	3.327e-08	1131860	0.002188	rs10080647	secondary
rs7754916	6	119112591	T	0.3187	-0.0106	0.0015	2.024e-12	1131840	9.531e-05	rs9492774	primary
rs11759026	6	126792095	A	0.7669	-0.0098	0.0017	4.101e-09	1111930	0.000177	rs9454297	primary
rs13219424	6	128332084	T	0.3169	0.0104	0.0015	5.465e-12	1127680	0.0002067	rs9370774	primary
rs9492774	6	131302489	C	0.3692	0.0087	0.0015	2.433e-09	1131860	0.0003193	rs1487445	primary
rs9373363	6	143150043	A	0.7485	-0.0111	0.0016	6.102e-12	1131840	5.085e-05	rs552965	primary
rs552965	6	145623921	A	0.8926	-0.0162	0.0023	9.259e-13	1128480	6.082e-05	rs2022330	primary
rs34286836	6	148273664	T	0.4479	-0.0092	0.0014	8.814e-11	1131840	0.000257	rs1487445	primary
rs6557171	6	152234593	T	0.3232	-0.0154	0.0015	1.391e-24	1131780	0.0003175	rs1487445	primary
rs1933264	6	153391618	T	0.7491	0.0101	0.0016	4.26e-10	1131840	2.341e-05	rs9370774	primary
rs9371883	6	155644978	C	0.643	-0.0087	0.0015	2.472e-09	1130140	0.0002318	rs113588399	primary
rs113588399	6	157236426	T	0.2079	-0.0108	0.0017	4.729e-10	1131850	0.0002505	rs1487445	primary
rs9364664	6	163023054	T	0.2107	-0.0104	0.0017	1.609e-09	1131840	0.0001258	rs942642	primary
rs6917154	6	167135156	T	0.1236	0.0125	0.0021	4.714e-09	1124440	0.000122	rs9492774	primary
rs4719460	7	859610	T	0.656	-0.0087	0.0015	4.927e-09	1127710	0.0001321	rs4719944	primary
rs62444881	7	2052318	T	0.1958	0.0159	0.0018	2.547e-19	1131800	0.001646	rs13240401	primary
rs13240401	7	2194396	T	0.7812	0.0167	0.0017	4.497e-22	1095150	0.001646	rs62444881	primary
rs4719944	7	3496032	T	0.5462	-0.0122	0.0014	6.395e-18	1131800	0.0001531	rs1978102	primary
rs17568389	7	8091876	A	0.5087	0.0129	0.0014	3.976e-20	1131790	0.0001548	rs10953083	primary
rs118134876	7	11500372	T	0.0578	-0.0226	0.003	6.079e-14	1125710	0.0001904	rs57107575	primary
rs57107575	7	11897511	T	0.312	0.0089	0.0015	4.651e-09	1131850	0.0001904	rs118134876	primary
rs6977237	7	14027991	T	0.4725	0.0082	0.0014	6.308e-09	1131850	0.0001048	rs62444881	primary
rs6461536	7	21131807	A	0.7118	0.0088	0.0015	1.349e-08	1130130	5.957e-05	rs9771228	primary
rs35929923	7	21400525	A	0.2495	-0.0115	0.0016	1.58e-12	1131830	0.000167	rs62444881	primary
rs79265434	7	24621381	A	0.8834	-0.0194	0.0022	6.691e-19	1131800	0.0001124	rs4719944	primary
rs9771228	7	32322496	T	0.6491	0.0096	0.0015	5.977e-11	1131850	8.68e-05	rs9655780	primary
rs12531458	7	39090698	A	0.5205	0.012	0.0014	3.762e-17	1131840	6.378e-05	rs2079987	primary
rs10268735	7	39376022	A	0.663	-0.0095	0.0015	3.272e-10	1131860	0.03612	rs12531458	secondary
rs799443	7	44769013	A	0.6617	-0.0097	0.0015	9.597e-11	1118870	0.0001297	rs1405876	primary
rs11977916	7	48758121	A	0.554	-0.0088	0.0014	4.446e-10	1131830	0.0002591	rs17551064	primary
rs17551064	7	49869771	A	0.8378	0.0144	0.0019	4.342e-14	1130110	0.0002591	rs11977916	primary
rs2282930	7	50754679	A	0.2296	0.0095	0.0017	1.297e-08	1131860	0.0007667	rs17551064	secondary
rs62452901	7	54726265	A	0.371	-0.008	0.0015	3.351e-08	1131860	0.0002163	rs10953083	secondary
rs7803932	7	70203673	A	0.1667	0.0126	0.0019	1.894e-11	1131830	8.427e-05	rs2100249	primary
rs1978102	7	71750298	T	0.5209	-0.0151	0.0014	4.841e-27	1131760	0.0001574	rs35929923	primary
rs60717745	7	75846083	C	0.844	-0.0117	0.0019	1.298e-09	1131840	4.489e-05	rs10953083	primary
rs1405876	7	86237581	T	0.6403	0.0111	0.0015	4.053e-14	1130120	0.0001297	rs799443	primary
rs6465353	7	91779971	T	0.6061	-0.008	0.0014	2.782e-08	1131860	0.000211	rs10953083	secondary
rs10953083	7	92657034	A	0.4523	0.0126	0.0014	6.155e-19	1115730	0.0001748	rs9655780	primary
rs6951996	7	96646437	A	0.0522	-0.0181	0.0032	1.672e-08	1098170	0.0001473	rs9655780	primary
rs2406253	7	100077273	A	0.8053	0.0138	0.0018	9.666e-15	1122050	0.0001257	rs413348	primary
rs413348	7	101692987	A	0.7774	0.0114	0.0017	1.81e-11	1123060	0.0001257	rs2406253	primary
rs9655780	7	104667334	A	0.8287	-0.0156	0.0019	9.153e-17	1117590	0.0001748	rs10953083	primary
rs78270331	7	108283859	T	0.0648	-0.0165	0.0028	6.496e-09	1131850	0.0001264	rs9655780	primary
rs139244147	7	111912738	A	0.0604	-0.0196	0.003	4.632e-11	1108730	5.571e-05	rs2079987	primary
rs117668569	7	112816099	T	0.9718	0.0234	0.0042	3.617e-08	1128930	0.0001305	rs2193255	primary
rs2100249	7	113848497	T	0.3488	-0.0089	0.0015	1.97e-09	1125960	0.0001179	rs2079987	primary
rs2193255	7	117520009	A	0.4461	0.0096	0.0014	1.021e-11	1129390	0.0001305	rs117668569	primary
rs7785662	7	122087592	A	0.3535	-0.0097	0.0015	1.056e-10	1082670	0.0001767	rs61755388	primary
rs61755388	7	126541317	T	0.7878	0.0122	0.0017	1.172e-12	1131840	0.0002617	rs75278839	primary
rs75278839	7	127574396	T	0.0343	0.0291	0.0039	1.008e-13	1102730	0.0002617	rs61755388	primary
rs339099	7	128396345	T	0.5036	-0.0127	0.0014	1.047e-19	1131800	0.0002259	rs75278839	primary
rs7799141	7	132660489	A	0.3104	0.0095	0.0015	3.661e-10	1131850	0.001224	rs57352738	primary
rs57352738	7	133304694	A	0.204	-0.015	0.0017	6.086e-18	1131810	0.001224	rs7799141	primary
rs3812281	7	135082751	T	0.6016	0.0112	0.0014	5.171e-15	1129390	0.0001659	rs57352738	primary
rs728054	7	137072364	A	0.3561	-0.0124	0.0015	2.333e-17	1131810	0.000131	rs35929923	primary
rs2303929	7	150761314	A	0.2347	0.0091	0.0017	3.695e-08	1127190	0.0009224	rs2079987	secondary
rs2079987	7	151342640	C	0.4195	-0.0112	0.0014	3.815e-15	1130100	0.0001564	rs62444881	primary
rs11505217	7	155560120	A	0.8431	0.0109	0.0019	1.692e-08	1131850	5.446e-05	rs79265434	primary
rs7016302	8	4833041	C	0.8308	-0.0128	0.0019	8.586e-12	1131840	0.0001179	rs2725370	primary
rs6994287	8	9340932	A	0.4055	0.0092	0.0014	1.532e-10	1128780	0.01009	rs59480703	primary
rs59480703	8	9653130	C	0.1936	-0.0113	0.0018	2.113e-10	1129320	0.01009	rs6994287	primary
rs76552497	8	12679680	T	0.1704	-0.0122	0.0019	7.105e-11	1131050	9.429e-05	rs59480703	primary
rs3808645	8	17013199	T	0.8439	-0.0108	0.0019	2.151e-08	1129350	4.907e-05	rs2977464	primary
rs7816777	8	19371767	T	0.3526	-0.0088	0.0015	2.26e-09	1131040	2.501e-05	rs3808645	primary
rs4739235	8	21287105	A	0.1701	0.011	0.0019	3.982e-09	1131050	5.209e-05	rs1142528	primary
rs73219805	8	26272768	A	0.1661	0.0104	0.0019	3.464e-08	1131060	5.603e-05	rs2725370	primary
rs35927132	8	28683300	T	0.157	0.0127	0.0019	4.32e-11	1128610	0.0002418	rs2725370	primary
rs2725370	8	30852826	T	0.3017	-0.0141	0.0015	4.511e-20	1118470	0.0002418	rs35927132	primary
rs2681616	8	31353409	A	0.4902	-0.0087	0.0014	6.176e-10	1131050	8.688e-05	rs1142528	primary
rs2925033	8	40051186	T	0.4818	0.0082	0.0014	5.212e-09	1128990	3.166e-05	rs4739235	primary
rs2923424	8	42382222	A	0.6069	0.012	0.0014	9.717e-17	1126870	2.804e-05	rs3808645	primary
rs2929032	8	56371745	A	0.4654	-0.0084	0.0014	2.088e-09	1131050	0.000256	rs2246873	primary
rs2246873	8	57433941	A	0.545	0.0107	0.0014	2.56e-14	1129340	0.000256	rs2929032	primary
rs60058315	8	66511275	A	0.3286	-0.0086	0.0015	9.333e-09	1131050	5.029e-05	rs1142528	primary
rs1142528	8	87481300	T	0.5557	0.0084	0.0014	3.201e-09	1131050	0.003209	rs1982564	primary
rs1982564	8	87776287	T	0.5606	0.01	0.0014	1.445e-12	1129090	0.003209	rs1142528	primary
rs2740795	8	91927455	A	0.7377	0.0099	0.0016	5.252e-10	1123980	0.0001681	rs35606437	primary
rs35606437	8	93327532	A	0.2675	0.0109	0.0016	7.22e-12	1131040	0.0001681	rs2740795	primary
rs9642928	8	95613926	A	0.3261	0.0083	0.0015	4.571e-08	1094420	7.218e-05	rs1982564	primary
rs1786313	8	101737075	T	0.3139	0.0088	0.0015	7.069e-09	1131050	0.0001289	rs35606437	primary
rs7012546	8	105067737	T	0.4166	0.0093	0.0014	8.209e-11	1129330	8.107e-05	rs2681616	primary
rs72672052	8	115798424	A	0.1753	-0.0104	0.0018	1.723e-08	1131060	0.0001778	rs4298514	secondary
rs4298514	8	118932887	T	0.6986	0.0104	0.0015	1.065e-11	1131050	9.766e-05	rs1142528	primary
rs76508452	8	120040254	A	0.0651	0.0158	0.0029	3.552e-08	1127660	0.005997	rs35250297	secondary
rs35250297	8	120212184	T	0.1158	0.0141	0.0022	1.379e-10	1128620	5.398e-05	rs1982564	primary
rs298601	8	130932427	T	0.5237	-0.0105	0.0014	7.465e-14	1131030	6.453e-05	rs2725370	primary
rs74462621	8	133732856	T	0.1357	0.0122	0.0021	2.882e-09	1129340	8.822e-05	rs2725370	primary
rs74545339	8	135440608	A	0.1142	-0.016	0.0022	4.075e-13	1131030	4.933e-05	rs2725370	primary
rs2977464	8	141545193	T	0.1869	0.0103	0.0018	1.106e-08	1131050	0.0001043	rs902820	primary
rs1566085	8	142624527	T	0.5483	0.013	0.0014	3.116e-20	1127340	0.0001232	rs2725370	primary
rs902820	8	143099872	A	0.4224	-0.009	0.0014	3.31e-10	1126370	0.00485	rs77702622	primary
rs144336753	8	143356114	A	0.0181	0.0367	0.0053	4.483e-12	1112870	0.001124	rs77702622	primary
rs77702622	8	143367857	A	0.0614	-0.0199	0.0029	1.397e-11	1122410	0.00485	rs902820	primary
rs750472	8	145701453	A	0.495	-0.0127	0.0014	1.201e-19	1127340	0.0001077	rs902820	primary
rs7849487	9	1757274	T	0.6578	-0.0165	0.0015	7.249e-29	1129320	4.43e-05	rs13296345	primary
rs10974256	9	3952892	A	0.3411	-0.0091	0.0015	9.622e-10	1117590	0.002264	rs73643713	primary
rs73643713	9	4163612	T	0.928	-0.0158	0.0027	6.348e-09	1131480	0.002264	rs10974256	primary
rs723968	9	14154231	T	0.8557	0.0172	0.002	6.664e-18	1131010	0.0001408	rs921107	primary
rs4741377	9	14429307	T	0.5806	-0.0078	0.0014	3.814e-08	1131060	0.00031	rs13296345	secondary
rs13296345	9	14791348	T	0.6299	0.0092	0.0015	2.352e-10	1131040	5.826e-05	rs7040340	primary
rs1032687	9	22526995	T	0.828	-0.0102	0.0019	4.592e-08	1131060	0.003194	rs7868984	secondary
rs7868984	9	23357826	T	0.5885	-0.0249	0.0014	4.324e-67	1118250	0.0001665	rs12375999	primary
rs1329044	9	23747791	T	0.8276	0.0129	0.0019	5.636e-12	1118120	0.001454	rs1758747	primary
rs1758747	9	25300643	A	0.6962	0.0087	0.0015	1.419e-08	1129340	0.001454	rs1329044	primary
rs7041702	9	33053430	A	0.7406	-0.0109	0.0016	9.425e-12	1131040	6.097e-05	rs921107	primary
rs11138947	9	72110562	T	0.7236	0.0101	0.0016	1.015e-10	1131040	0.0001476	rs35012903	primary
rs35012903	9	73055336	T	0.4247	-0.0088	0.0014	5.603e-10	1131050	0.0001743	rs4877152	primary
rs9886703	9	82246351	A	0.1671	-0.0125	0.0019	2.834e-11	1129320	0.00294	rs4877152	primary
rs4877152	9	82438585	T	0.558	0.0094	0.0014	2.543e-11	1131040	0.00294	rs9886703	primary
rs7035315	9	83231511	A	0.6292	-0.0083	0.0015	1.131e-08	1131050	0.001068	rs4877152	primary
rs7020920	9	86347532	A	0.3502	0.0086	0.0015	6.307e-09	1128610	0.0001536	rs4877152	primary
rs921107	9	87999370	A	0.538	-0.0098	0.0014	2.855e-12	1131040	0.0001408	rs723968	primary
rs7040995	9	92226172	C	0.5324	0.0095	0.0014	1.512e-11	1131040	4.658e-05	rs921107	primary
rs7040340	9	96443910	A	0.3915	0.0098	0.0014	9.841e-12	1131040	8.665e-05	rs73581580	primary
rs12375999	9	99087796	T	0.1587	0.0128	0.0019	3.506e-11	1116080	0.0001665	rs7868984	primary
rs12377606	9	109446277	A	0.8965	-0.0129	0.0023	2.248e-08	1130510	0.001647	rs11789013	secondary
rs11789013	9	109677417	T	0.7585	0.0106	0.0017	1.233e-10	1116800	0.0001396	rs35012903	primary
rs10979613	9	111687584	T	0.6389	-0.0114	0.0015	4.836e-15	1131020	0.0001118	rs11789013	primary
rs76235882	9	121096681	A	0.966	0.0247	0.0039	1.841e-10	1129810	0.0002248	rs7867310	primary
rs7867310	9	121987544	A	0.5246	-0.0107	0.0014	2.43e-14	1131030	0.001299	rs1009470	primary
rs1009470	9	122289187	T	0.4414	0.0082	0.0014	6.357e-09	1131050	0.001299	rs7867310	primary
rs2416759	9	123358262	A	0.6986	-0.01	0.0015	6.734e-11	1126900	0.0007318	rs12375949	primary
rs12375949	9	124617900	T	0.4312	-0.0142	0.0014	1.462e-23	1131000	0.0007318	rs2416759	primary
rs10760213	9	124980130	A	0.3614	0.0082	0.0015	1.838e-08	1127400	0.0001139	rs12375949	primary
rs12342546	9	126329270	A	0.2441	-0.0126	0.0017	2.952e-14	1094400	0.000182	rs631287	primary
rs631287	9	128412676	A	0.558	0.0081	0.0014	8.786e-09	1128620	0.0002471	rs1573178	primary
rs1573178	9	130372487	T	0.4707	-0.0087	0.0014	6.368e-10	1127790	0.0002471	rs631287	primary
rs7040224	9	134886837	A	0.3154	-0.0149	0.0015	6.337e-23	1131000	0.0003592	rs12682765	primary
rs11243638	9	135021608	T	0.2118	0.0104	0.0017	1.861e-09	1114380	0.004787	rs7040224	secondary
rs12682765	9	135490356	T	0.7751	-0.0114	0.0017	1.098e-11	1131040	0.0003592	rs7040224	primary
rs73581580	9	140251458	A	0.1248	-0.0178	0.0022	1.784e-15	1016790	8.665e-05	rs7040340	primary
rs11598350	10	4159561	T	0.7903	0.0117	0.0018	2.947e-11	1090230	7.315e-05	rs12768641	primary
rs11595166	10	4811925	T	0.0785	0.0145	0.0026	3.331e-08	1111710	0.0002752	rs11598350	secondary
rs72777347	10	9965784	A	0.3748	0.0083	0.0015	9.024e-09	1130130	0.0003678	rs1747714	primary
rs1747714	10	11161316	T	0.5287	0.0107	0.0014	2.596e-14	1131280	0.0003678	rs72777347	primary
rs10752262	10	12395100	T	0.4192	0.0101	0.0014	2.296e-12	1110960	8.348e-05	rs2183271	primary
rs7905192	10	12711949	T	0.572	0.0086	0.0014	1.552e-09	1131860	6.216e-05	rs10752262	primary
rs2183271	10	21957229	T	0.6364	0.0082	0.0015	3.59e-08	1082680	0.0001511	rs4384309	primary
rs1888765	10	23943839	C	0.7815	0.0097	0.0017	1.06e-08	1129340	0.0001448	rs4384309	primary
rs55738232	10	28775486	T	0.2301	-0.0092	0.0017	4.02e-08	1129350	8.209e-05	rs11003438	secondary
rs806816	10	32285942	A	0.7498	0.01	0.0016	8.06e-10	1131040	7.959e-05	rs2183271	primary
rs2007655	10	34586689	T	0.4976	0.0086	0.0014	1.096e-09	1131050	3.22e-05	rs7905192	primary
rs11003438	10	51796962	T	0.3888	-0.009	0.0015	8.899e-10	1085040	8.65e-05	rs1747714	primary
rs2588959	10	63598957	T	0.5019	-0.0077	0.0014	4.409e-08	1131060	0.0003695	rs7924036	primary
rs7924036	10	65191645	T	0.5124	0.0131	0.0014	1.005e-20	1131000	0.0003695	rs2588959	primary
rs12359372	10	67767951	T	0.6624	-0.0084	0.0015	1.83e-08	1129330	0.006718	rs10822745	primary
rs10822745	10	67954065	T	0.5763	0.0111	0.0014	8.683e-15	1131020	0.006718	rs12359372	primary
rs10509516	10	87023581	T	0.8045	-0.0123	0.0018	3.056e-12	1131040	8.242e-05	rs1426619	primary
rs1426619	10	90091540	T	0.4346	0.0093	0.0014	4.98e-11	1131030	0.0001359	rs1888765	primary
rs482787	10	99767024	T	0.6749	0.0102	0.0015	1.179e-11	1131050	6.389e-05	rs10509516	primary
rs73344830	10	103816828	A	0.4181	0.0143	0.0015	5.098e-22	1128510	0.07867	rs4919624	primary
rs4919624	10	104021085	A	0.8022	0.0137	0.0018	8.977e-14	1130970	0.07867	rs73344830	primary
rs11191614	10	104977603	T	0.1396	-0.0139	0.002	7.999e-12	1131040	0.005904	rs4919624	primary
rs790647	10	106776484	A	0.2278	-0.0139	0.0017	1.329e-16	1131020	0.002502	rs12772959	primary
rs12772959	10	107567083	C	0.1668	0.0124	0.0019	4.426e-11	1128520	0.002502	rs790647	primary
rs7899270	10	111258134	A	0.6524	-0.0085	0.0015	8.645e-09	1116800	0.0004507	rs72828283	primary
rs72828283	10	111835691	T	0.0898	0.0152	0.0025	7.946e-10	1115100	0.0004507	rs7899270	primary
rs9787575	10	118813877	T	0.1547	-0.0121	0.002	5.905e-10	1116080	8.851e-05	rs72777347	primary
rs10901813	10	126429875	A	0.7492	-0.0088	0.0016	4.676e-08	1131060	4.444e-05	rs482787	secondary
rs4384309	10	133110596	A	0.4641	0.0103	0.0014	3.544e-13	1116790	0.0001511	rs2183271	primary
rs12761761	10	133775375	T	0.2395	0.0156	0.0017	8.804e-21	1093930	5.919e-05	rs12768641	primary
rs12768641	10	134966154	A	0.763	0.0091	0.0017	3.348e-08	1125840	8.584e-05	rs1888765	primary
rs10831656	11	11660815	T	0.3134	0.0089	0.0015	3.479e-09	1130130	5.871e-06	rs7931563	primary
rs7940022	11	12873906	T	0.6914	0.0132	0.0015	3.53e-18	1131810	5.036e-05	rs3824874	primary
rs1596854	11	25064297	A	0.4897	0.009	0.0014	1.293e-10	1131840	8.532e-05	rs1783978	primary
rs12273363	11	27744859	T	0.7999	0.01	0.0018	1.104e-08	1131850	0.0007375	rs704614	primary
rs704614	11	29682698	T	0.3808	-0.0082	0.0014	1.224e-08	1131300	0.0007375	rs12273363	primary
rs795230	11	30774525	T	0.4283	0.008	0.0014	1.861e-08	1130030	0.0003749	rs704614	primary
rs7938370	11	39938810	T	0.8066	0.0106	0.0018	2.601e-09	1130140	0.0003645	rs10742591	primary
rs10742591	11	41548956	A	0.6097	-0.0087	0.0014	1.518e-09	1131850	0.0003645	rs7938370	primary
rs79728014	11	46062245	A	0.8553	-0.0141	0.002	1.735e-12	1131840	0.0006296	rs1783978	primary
rs1783978	11	57463500	T	0.4434	0.0095	0.0014	1.711e-11	1131850	0.0006296	rs79728014	primary
rs75033012	11	61347033	C	0.0391	-0.0224	0.0038	5.049e-09	1020860	0.01419	rs7931563	primary
rs7931563	11	61446425	T	0.6214	-0.01	0.0015	6.44e-12	1128170	0.01419	rs75033012	primary
rs118093058	11	62413673	T	0.133	0.0147	0.0021	2.819e-12	1096300	0.0002956	rs75033012	primary
rs58779949	11	64007159	A	0.1698	0.0115	0.0019	9.447e-10	1129910	0.0006353	rs10791830	primary
rs10791830	11	65661291	T	0.1947	-0.0122	0.0018	5.654e-12	1129400	0.001609	rs76878669	primary
rs76878669	11	66092567	C	0.7609	0.0132	0.0017	2.705e-15	1093240	0.001609	rs10791830	primary
rs2236708	11	68378045	A	0.2544	-0.009	0.0016	1.971e-08	1131310	0.0003388	rs76878669	primary
rs72962169	11	72365669	T	0.1595	-0.0173	0.0019	1.914e-19	1130090	4.371e-05	rs1783978	primary
rs10899282	11	76504698	A	0.2279	0.0138	0.0017	2.969e-16	1110700	9.526e-05	rs1880692	primary
rs7127580	11	79144856	C	0.8925	-0.0152	0.0023	1.75e-11	1131840	6.752e-05	rs795230	primary
rs1880692	11	80338069	A	0.5346	0.0087	0.0014	5.822e-10	1131840	0.0002048	rs10830858	primary
rs1792602	11	90439633	A	0.3824	-0.0098	0.0014	1.282e-11	1131840	0.0003183	rs10830858	primary
rs10830858	11	91896638	T	0.5104	0.0094	0.0014	1.84e-11	1131840	0.0003183	rs1792602	primary
rs3824874	11	95657111	T	0.6061	-0.011	0.0014	3.532e-14	1119290	0.002683	rs11021432	primary
rs11021432	11	95837674	A	0.3692	0.0101	0.0015	4.384e-12	1130120	0.002683	rs3824874	primary
rs1301838	11	99670514	T	0.3227	-0.0097	0.0015	1.013e-10	1131840	0.0002562	rs11021432	primary
rs968454	11	107141974	A	0.7569	0.0104	0.0016	2.361e-10	1131850	3.058e-05	rs10830858	primary
rs17536059	11	110957335	C	0.1721	-0.0107	0.0019	9.674e-09	1131850	0.0001166	rs11608149	primary
rs11608149	11	111535102	A	0.2707	0.0099	0.0016	4.015e-10	1131840	0.0001166	rs17536059	primary
rs7928017	11	113448762	A	0.4341	0.0096	0.0014	1.195e-11	1129400	8.223e-05	rs11608149	primary
rs2126069	11	115473374	T	0.4773	0.0084	0.0014	2.719e-09	1130150	0.0001863	rs3824874	primary
rs7925256	11	117045335	T	0.0907	0.0154	0.0025	3.69e-10	1117590	8.867e-05	rs3824874	primary
rs11217917	11	120441767	C	0.7047	0.0085	0.0015	2.955e-08	1130150	0.0002388	rs3824874	secondary
rs10892807	11	121998254	T	0.5671	0.0114	0.0014	1.119e-15	1130120	0.0001658	rs3824874	primary
rs1109768	11	122192439	T	0.4175	0.0079	0.0014	2.864e-08	1119900	0.0007257	rs10892807	secondary
rs7108020	11	131289820	A	0.6475	0.0111	0.0015	3.585e-14	1130000	0.0001806	rs12273435	primary
rs10750539	11	133548873	A	0.3517	-0.0083	0.0015	1.815e-08	1127640	0.006129	rs12273435	primary
rs329645	11	133813168	T	0.7288	0.0101	0.0017	9.915e-10	1131870	0.09595	rs12273435	secondary
rs12273435	11	133825855	A	0.207	-0.0159	0.0018	5.441e-18	1108860	0.006129	rs10750539	primary
rs886942	12	1964885	T	0.8747	-0.0143	0.0021	1.505e-11	1131840	7.502e-05	rs10783243	primary
rs2742112	12	10325128	T	0.3218	0.0084	0.0015	1.866e-08	1131850	0.0001622	rs1066391	primary
rs10772644	12	13417617	C	0.8887	0.0142	0.0022	2.138e-10	1131840	2.578e-05	rs2216144	primary
rs7974852	12	14511679	A	0.5235	0.0116	0.0014	1.968e-16	1119270	0.0001286	rs1304739	primary
rs1304739	12	15506906	T	0.2764	-0.0108	0.0016	7.711e-12	1124500	0.0001286	rs7974852	primary
rs10846380	12	16747034	T	0.4161	0.0088	0.0014	5.135e-10	1131850	0.0001593	rs1066391	primary
rs1603460	12	23092626	T	0.4206	0.0091	0.0014	1.425e-10	1130130	5.593e-05	rs12811301	primary
rs11613431	12	26684343	A	0.262	-0.0094	0.0016	6.269e-09	1095220	0.0001719	rs1066391	primary
rs12811301	12	27347552	A	0.27	0.0103	0.0016	6.867e-11	1131840	0.0001076	rs2131167	primary
rs10844179	12	32469601	A	0.2257	0.0104	0.0017	6.082e-10	1131840	0.0001059	rs7139165	primary
rs67790232	12	46079172	A	0.794	0.0099	0.0017	1.245e-08	1120300	0.0002334	rs10783243	primary
rs10783243	12	48653003	A	0.5228	-0.0094	0.0014	2.097e-11	1131840	0.0003166	rs6580698	primary
rs6580698	12	49478658	T	0.5624	-0.0129	0.0014	1.272e-19	1119270	0.0003166	rs10783243	primary
rs4307773	12	51144432	T	0.4102	0.008	0.0014	1.849e-08	1131850	0.001425	rs10783243	secondary
rs3741499	12	56474379	T	0.3434	0.0184	0.0015	5.03e-35	1117480	7.307e-05	rs12811301	primary
rs7139165	12	58412978	A	0.703	0.0108	0.0016	1.056e-11	1057890	0.0004872	rs6581243	primary
rs6581243	12	59746776	T	0.3724	-0.0086	0.0015	2.898e-09	1131300	0.0004872	rs7139165	primary
rs11174399	12	62646556	A	0.2008	0.011	0.0018	3.858e-10	1131840	8.88e-05	rs2216144	primary
rs1066391	12	67716703	A	0.3521	-0.0087	0.0015	3.355e-09	1131850	0.0001962	rs28768122	primary
rs17113730	12	74936526	A	0.0717	-0.0168	0.0027	6.302e-10	1131840	3.904e-05	rs7958371	primary
rs11115056	12	82258775	A	0.0995	0.0192	0.0023	2.405e-16	1128410	0.0001277	rs1066391	primary
rs2731218	12	83944822	A	0.5658	-0.0125	0.0014	1.236e-18	1129550	0.0001789	rs1196760	primary
rs704061	12	89771903	T	0.5451	0.0083	0.0014	3.808e-09	1131300	0.0001475	rs1389473	primary
rs1389473	12	92154270	A	0.3723	-0.0087	0.0015	2.246e-09	1131850	0.0001475	rs704061	primary
rs2216144	12	97666478	T	0.5306	0.0104	0.0014	1.223e-13	1131840	8.988e-05	rs11115056	primary
rs10777859	12	97792787	A	0.4751	-0.0078	0.0014	3.364e-08	1131850	0.002638	rs2216144	secondary
rs2131167	12	99633189	A	0.4458	0.0079	0.0014	2.678e-08	1130130	0.0001137	rs7958371	primary
rs7958371	12	103456084	A	0.3552	-0.0086	0.0015	5.136e-09	1131840	0.0001257	rs28768122	primary
rs1196760	12	105606068	C	0.9105	0.014	0.0025	1.579e-08	1117620	0.0001789	rs2731218	primary
rs28669886	12	106722701	A	0.3548	-0.0089	0.0015	1.19e-09	1131850	0.0001407	rs7977614	primary
rs7977614	12	110115286	A	0.7143	-0.0136	0.0016	2.108e-17	1056570	0.0001407	rs28669886	primary
rs3809169	12	113911532	T	0.9128	0.0141	0.0025	2.873e-08	1077370	1.421e-05	rs11613431	primary
rs73405293	12	117522917	A	0.1516	0.0113	0.002	9.697e-09	1123850	7.25e-05	rs7139165	primary
rs1671770	12	120946568	A	0.1786	0.0135	0.0018	2.52e-13	1131830	0.01578	rs1718188	primary
rs1718188	12	121343893	A	0.4365	0.0113	0.0014	1.849e-15	1131830	0.01578	rs1671770	primary
rs2942375	12	122154629	T	0.3408	-0.0082	0.0015	2.841e-08	1128620	0.001986	rs1718188	secondary
rs10773208	12	122970156	T	0.2526	-0.0098	0.0016	1.344e-09	1131830	0.003076	rs28768122	primary
rs28768122	12	123885974	T	0.2471	0.018	0.0017	5.957e-27	1076190	0.003076	rs10773208	primary
rs1107871	12	132240659	A	0.5506	-0.0085	0.0014	1.631e-09	1131860	6.148e-05	rs886942	primary
rs4770057	13	21143121	A	0.7809	-0.0094	0.0017	2.666e-08	1130140	4.684e-05	rs7986115	primary
rs9529119	13	31783977	C	0.2206	0.0125	0.0017	1.51e-13	1130110	3.832e-05	rs9545421	primary
rs9545421	13	36381662	T	0.8719	0.0137	0.0021	7.702e-11	1131050	3.832e-05	rs9529119	primary
rs12552	13	53625781	A	0.4412	0.0083	0.0014	5.062e-09	1131060	0.001441	rs12875339	primary
rs9536462	13	54124650	A	0.1454	0.0131	0.002	4.239e-11	1131040	0.001447	rs12875339	primary
rs12875339	13	55722033	A	0.6449	-0.0098	0.0015	2.091e-11	1131040	0.001447	rs9536462	primary
rs1334297	13	58335375	A	0.7375	0.0266	0.0016	2.083e-62	1130820	0.0003181	rs12552	primary
rs1538859	13	59458185	A	0.1647	-0.011	0.0019	7.374e-09	1131070	0.004077	rs1334297	secondary
rs9538557	13	60610506	A	0.7466	-0.0106	0.0016	5.166e-11	1131040	0.0001711	rs1334297	primary
rs4497562	13	62612604	A	0.7295	0.0114	0.0016	6.096e-13	1131040	0.0001772	rs9540720	primary
rs9540720	13	66922705	A	0.5101	0.0092	0.0014	5.641e-11	1131050	0.0001772	rs4497562	primary
rs7321274	13	69146186	A	0.7999	0.0117	0.0018	2.673e-11	1131040	9.166e-05	rs9538557	primary
rs2478208	13	81471113	C	0.5204	-0.0103	0.0014	1.901e-13	1129320	4.963e-05	rs7332724	primary
rs7332724	13	91629272	T	0.2767	-0.0122	0.0016	8.113e-15	1131020	0.004101	rs11620355	primary
rs11620355	13	92044587	A	0.0912	0.0172	0.0025	2.573e-12	1118500	0.004101	rs7332724	primary
rs9513416	13	99055774	A	0.8437	-0.0113	0.0019	5.522e-09	1131050	0.0001193	rs7986115	primary
rs9556958	13	99100046	T	0.5233	-0.011	0.0014	4.578e-15	1129070	0.0002205	rs7986115	primary
rs7986115	13	100745478	A	0.6332	0.0091	0.0015	3.537e-10	1129340	0.0002205	rs9556958	primary
rs8004294	14	21824283	A	0.9079	-0.0166	0.0024	8.293e-12	1131840	0.0004696	rs12431682	primary
rs11157931	14	23403193	A	0.3924	-0.0143	0.0014	1.809e-23	1131780	0.0003759	rs8004294	primary
rs11623285	14	24557642	T	0.863	-0.0134	0.0021	9.584e-11	1105110	7.19e-05	rs8004294	primary
rs12101183	14	26935305	A	0.2392	0.0143	0.0016	2.689e-18	1131810	0.0004483	rs8004294	primary
rs176218	14	29600506	T	0.1958	0.0192	0.0018	4.289e-27	1131750	0.01374	rs72673540	primary
rs72673540	14	29822264	T	0.0919	-0.0178	0.0025	1.572e-12	1067220	0.01374	rs176218	primary
rs3783300	14	30070659	A	0.3844	-0.0088	0.0014	1.297e-09	1131860	0.002831	rs7147566	secondary
rs7147566	14	30608327	T	0.2798	0.0105	0.0016	1.901e-11	1130130	9.357e-05	rs12101183	primary
rs17096758	14	30916250	C	0.181	-0.0103	0.0018	1.798e-08	1114370	0.0008082	rs7147566	secondary
rs8016504	14	33308021	A	0.5427	-0.0087	0.0014	6.501e-10	1125940	0.0001922	rs8004294	primary
rs12891042	14	34018986	T	0.5853	0.0089	0.0014	3.975e-10	1130130	3.249e-05	rs176218	primary
rs1007731	14	37054590	A	0.1159	-0.0143	0.0022	1.112e-10	1104930	0.0002422	rs8004294	primary
rs8009933	14	39600212	A	0.6783	0.0088	0.0015	5.15e-09	1131860	0.0002085	rs8004294	primary
rs61997667	14	57280046	T	0.1511	-0.0134	0.002	7.9e-12	1131830	0.00702	rs198262	primary
rs198262	14	57283283	T	0.9574	-0.0198	0.0035	1.41e-08	1131300	0.00702	rs61997667	primary
rs10137475	14	58797953	A	0.5808	0.008	0.0014	1.792e-08	1131310	0.0004548	rs8004294	primary
rs1010053	14	61005625	A	0.7	-0.0089	0.0015	5.547e-09	1128570	0.0002103	rs8004294	primary
rs1453007	14	64974203	A	0.6851	-0.0106	0.0015	2.437e-12	1131830	0.000404	rs8004294	primary
rs12890931	14	69753369	T	0.6306	0.0094	0.0015	1.054e-10	1131840	0.0001373	rs7158218	primary
rs12897542	14	72449591	A	0.7988	-0.0122	0.0018	3.428e-12	1130930	0.0003216	rs8004294	primary
rs7158218	14	73934880	A	0.7117	-0.0096	0.0015	6.935e-10	1131850	0.0009008	rs730384	primary
rs730384	14	74889870	A	0.4388	0.0104	0.0014	1.81e-13	1131820	0.0009008	rs7158218	primary
rs17119973	14	84913111	A	0.2574	-0.0132	0.0016	2.273e-16	1131820	6.305e-05	rs11157931	primary
rs4904523	14	89723630	A	0.5208	-0.0081	0.0014	7.173e-09	1131840	0.0002719	rs8004294	primary
rs736281	14	94287830	T	0.3931	0.0086	0.0014	2.119e-09	1131840	0.0002976	rs8004294	primary
rs12431682	14	101539999	T	0.3699	-0.0093	0.0015	1.574e-10	1125350	0.0004696	rs8004294	primary
rs8008382	14	104054425	T	0.3009	-0.0105	0.0015	7.7e-12	1131830	9.983e-05	rs11157931	primary
rs61996546	15	26804131	T	0.5094	0.0095	0.0014	1.578e-11	1131840	8.829e-05	rs16975275	primary
rs17561924	15	27230816	T	0.4527	0.0099	0.0014	2.018e-12	1130130	0.0001193	rs1564347	primary
rs2381966	15	37412972	A	0.7388	-0.0087	0.0016	4.725e-08	1131060	0.0001683	rs16966271	secondary
rs16966271	15	38423730	T	0.2819	0.0092	0.0016	3.359e-09	1128790	6.916e-05	rs2272461	primary
rs11853760	15	47518372	A	0.3856	-0.0106	0.0015	5.095e-13	1129310	0.02696	rs281303	primary
rs281303	15	47689133	A	0.3263	0.0092	0.0015	1.43e-09	1131040	0.02696	rs11853760	primary
rs12900430	15	50996469	T	0.4764	0.0082	0.0014	4.92e-09	1129330	1.313e-05	rs17561924	primary
rs2431023	15	57553832	A	0.4151	0.0094	0.0014	4.255e-11	1131040	8.807e-05	rs61996546	primary
rs7171405	15	61466893	A	0.2432	-0.0099	0.0016	1.434e-09	1131050	7.097e-05	rs1564347	primary
rs68192600	15	65872897	A	0.1325	0.0149	0.0021	1.452e-12	1089430	6.426e-05	rs7171405	primary
rs36085856	15	70379236	C	0.0734	0.0199	0.0036	2.039e-08	648868	5.949e-05	rs4984541	primary
rs1564347	15	73438848	T	0.3433	0.0085	0.0015	8.369e-09	1128790	0.0003793	rs6495127	primary
rs6495127	15	75194490	T	0.7011	0.009	0.0015	5.142e-09	1131060	0.000428	rs11856579	primary
rs2469226	15	77246990	A	0.2228	0.0098	0.0017	6.91e-09	1131050	0.0003765	rs11856579	primary
rs11856579	15	78012688	A	0.2617	0.0148	0.0016	2.696e-20	1124920	0.000428	rs6495127	primary
rs2272461	15	93522312	A	0.6822	0.0085	0.0015	1.76e-08	1129110	0.0001338	rs1564347	primary
rs16975275	15	96046556	A	0.2306	-0.0105	0.0017	2.855e-10	1127390	8.829e-05	rs61996546	primary
rs4984541	15	96911139	A	0.7666	-0.0136	0.0017	9.034e-16	1081880	0.0001239	rs1564347	primary
rs34997977	16	677020	T	0.2287	0.0118	0.0017	1.663e-12	1123910	0.000111	rs2352795	primary
rs34316274	16	1018697	A	0.762	0.0094	0.0017	1.461e-08	1123910	0.0002005	rs35754740	primary
rs8046072	16	3562075	A	0.8017	0.0102	0.0018	7.628e-09	1130140	0.000168	rs7202829	primary
rs12709186	16	7249472	A	0.3236	-0.0095	0.0015	1.93e-10	1131850	0.0002849	rs9929993	primary
rs9929993	16	7664875	T	0.361	-0.0098	0.0015	1.814e-11	1131840	0.001689	rs11644446	primary
rs11644446	16	7943552	A	0.1562	0.0107	0.0019	3.894e-08	1125950	0.001689	rs9929993	primary
rs8052523	16	9293246	T	0.5697	-0.0081	0.0014	1.103e-08	1130130	0.0002353	rs9929993	primary
rs35016816	16	10266115	T	0.899	0.0174	0.0023	9.006e-14	1131820	4.024e-05	rs35754740	primary
rs34098770	16	12237812	A	0.152	-0.0163	0.002	6.28e-17	1131820	0.0001305	rs8052523	primary
rs112210983	16	14674204	A	0.2308	0.01	0.0017	2.187e-09	1129480	0.0001395	rs35754740	primary
rs2352795	16	19265885	T	0.6134	-0.0089	0.0015	1.087e-09	1111780	0.0001317	rs74415461	primary
rs7188873	16	24727064	A	0.3867	0.0109	0.0014	4.742e-14	1130490	9.737e-05	rs35754740	primary
rs62034319	16	28532188	T	0.5822	0.0157	0.0014	2.372e-28	1130980	0.0001632	rs35754740	primary
rs4785187	16	49766772	A	0.2253	-0.0097	0.0017	7.331e-09	1126870	0.0001341	rs8052523	primary
rs7205341	16	51190740	T	0.7883	0.0136	0.0017	3.023e-15	1124410	8.837e-05	rs2352795	primary
rs12921005	16	52442689	A	0.505	0.008	0.0014	1.09e-08	1131060	0.0002115	rs2352795	secondary
rs3809634	16	53538157	A	0.6842	-0.0106	0.0015	3.086e-12	1116780	9.398e-05	rs4785187	primary
rs2140440	16	54206736	A	0.6755	-0.0087	0.0015	9.747e-09	1115280	3.069e-05	rs3809634	primary
rs10083736	16	58855816	T	0.2129	0.0094	0.0017	4.319e-08	1131060	0.0001873	rs7202829	secondary
rs62047280	16	61582586	A	0.2182	0.0124	0.0017	3.98e-13	1116780	0.006509	rs7202829	primary
rs7202829	16	62131703	T	0.468	0.0092	0.0014	6.107e-11	1131050	0.006509	rs62047280	primary
rs35754740	16	63127870	T	0.5811	0.0081	0.0014	1.554e-08	1129340	0.0002005	rs34316274	primary
rs9888796	16	68297589	T	0.2625	0.0116	0.0016	4.984e-13	1129320	0.007049	rs74615093	primary
rs74615093	16	69122043	A	0.0772	0.0159	0.0026	1.569e-09	1130510	0.007049	rs9888796	primary
rs17604349	16	72210865	A	0.1852	0.0122	0.0018	1.486e-11	1131030	0.0008863	rs9888796	primary
rs9929762	16	78169675	A	0.5595	0.0094	0.0014	2.776e-11	1131040	3.63e-05	rs8052523	primary
rs61527214	16	83608599	A	0.4113	0.0108	0.0014	4.716e-14	1129310	0.000205	rs8052523	primary
rs74415461	16	89990843	T	0.0843	0.0171	0.0026	2.429e-11	1103220	0.0001396	rs62034319	primary
rs8066044	17	1367352	A	0.2712	0.009	0.0016	1.427e-08	1125230	0.0001007	rs10515007	primary
rs1381247	17	2302387	T	0.6667	0.0101	0.0015	1.733e-11	1113950	0.0001365	rs7224660	primary
rs854796	17	18070761	A	0.6932	0.0093	0.0015	1.27e-09	1120580	0.0001353	rs1842713	primary
rs870589	17	31614454	A	0.4595	-0.0079	0.0014	2.035e-08	1122300	0.0001304	rs11656316	primary
rs1842713	17	33200385	A	0.7882	-0.0116	0.0017	1.51e-11	1131840	0.0001715	rs10515007	primary
rs9649	17	34050934	T	0.1749	0.0107	0.0019	8.678e-09	1122300	9.653e-05	rs10515007	primary
rs12600751	17	37553651	C	0.2518	-0.0108	0.0016	3.015e-11	1131310	0.006236	rs2314338	primary
rs2314338	17	38344485	T	0.7304	0.0101	0.0016	4.321e-10	1078170	0.006236	rs12600751	primary
rs4793090	17	40686342	A	0.6635	0.0089	0.0015	1.853e-09	1131860	0.0006485	rs56192752	primary
rs11656316	17	42313644	A	0.7001	-0.0085	0.0015	3.868e-08	1124790	0.001517	rs2304987	primary
rs2304987	17	42927965	A	0.2272	-0.0125	0.0017	1.355e-13	1131830	0.005026	rs56192752	primary
rs12948326	17	43188117	T	0.6486	0.0089	0.0015	3.064e-09	1131870	0.02454	rs56192752	secondary
rs56192752	17	43555253	A	0.8218	0.0218	0.0019	9.356e-31	1089860	0.005026	rs2304987	primary
rs1058018	17	47000251	T	0.5678	-0.0087	0.0014	8.756e-10	1131840	9.832e-05	rs72833096	primary
rs10515007	17	50395539	T	0.161	0.0136	0.0019	1.272e-12	1131830	0.001054	rs12450129	primary
rs12450129	17	52073633	T	0.4878	-0.0079	0.0014	1.712e-08	1131310	0.001054	rs10515007	primary
rs72833096	17	55655932	C	0.1492	-0.0111	0.002	2.029e-08	1124440	9.832e-05	rs1058018	primary
rs7224660	17	56154848	A	0.1976	-0.0108	0.0018	1.233e-09	1118770	0.0001744	rs56192752	primary
rs75545207	17	59979512	A	0.1486	0.0124	0.002	4.314e-10	1109470	7.302e-05	rs7223311	primary
rs68145588	17	75864805	T	0.1395	-0.0126	0.0021	9.575e-10	1088600	2.615e-05	rs1058018	primary
rs7223311	17	78940614	C	0.5169	-0.0079	0.0014	1.795e-08	1121360	9.248e-05	rs4793090	primary
rs12967010	18	9645035	T	0.7746	0.0114	0.0017	9.887e-12	1130130	7.059e-05	rs72944064	primary
rs11663049	18	12991393	T	0.3908	0.0083	0.0014	8.209e-09	1131850	0.000133	rs72944064	primary
rs1623003	18	21165163	T	0.6594	0.0103	0.0015	3.532e-12	1130130	0.0002189	rs62090515	primary
rs8089996	18	22648505	A	0.568	-0.0122	0.0014	7.84e-18	1131810	0.0001152	rs11663049	primary
rs1220027	18	25656665	T	0.2959	0.0112	0.0015	2.862e-13	1131840	0.0005752	rs7226824	primary
rs7226824	18	27676827	T	0.5305	-0.0082	0.0014	6.544e-09	1131860	0.0005752	rs1220027	primary
rs9964724	18	35159124	T	0.6844	0.0189	0.0015	8.176e-36	1131730	0.001201	rs978807	primary
rs978807	18	36898459	A	0.1885	0.0126	0.0018	2.676e-12	1131820	0.003903	rs7233920	primary
rs7233920	18	37416318	A	0.2293	-0.0129	0.0017	1.249e-14	1131810	0.003903	rs978807	primary
rs56302931	18	38041036	T	0.6277	-0.0085	0.0015	5.195e-09	1131850	0.0008611	rs7233920	primary
rs11875240	18	39027043	A	0.8295	-0.0107	0.0019	8.959e-09	1127710	0.0001366	rs7233920	primary
rs12454989	18	40313140	T	0.7458	0.0092	0.0016	1.834e-08	1092790	0.0001263	rs12959099	primary
rs62090515	18	42671636	A	0.3605	-0.0091	0.0015	4.55e-10	1131850	0.0002189	rs1623003	primary
rs13381557	18	44513371	A	0.5413	-0.0084	0.0014	2.043e-09	1130140	2.689e-05	rs56302931	primary
rs1941961	18	48744150	A	0.4662	0.0085	0.0014	1.328e-09	1131850	0.0005046	rs12959099	primary
rs34481890	18	50164886	A	0.8104	0.011	0.0018	9.133e-10	1130150	0.01309	rs12959099	secondary
rs12959099	18	50711510	A	0.5494	0.0132	0.0014	1.691e-20	1131810	0.0005046	rs1941961	primary
rs613872	18	53210302	T	0.8285	-0.0165	0.0019	7.291e-19	1131810	0.000207	rs62090515	primary
rs190102446	18	57048571	T	0.0364	-0.0211	0.0037	1.627e-08	1131850	5.377e-05	rs62090515	primary
rs7243203	18	58997026	A	0.3184	-0.0093	0.0015	7.595e-10	1117590	2.754e-05	rs613872	primary
rs72944064	18	63516255	T	0.7437	-0.0101	0.0016	3.847e-10	1131840	0.0001795	rs56302931	primary
rs2554835	18	74141190	A	0.3998	0.009	0.0014	3.67e-10	1113470	8.658e-05	rs56775891	primary
rs11081529	18	75902735	T	0.7112	0.0127	0.0015	3.051e-16	1130100	2.291e-05	rs8089996	primary
rs74429170	18	77494020	A	0.9542	-0.0189	0.0034	2.068e-08	1125500	0.002431	rs56775891	secondary
rs56775891	18	77575613	T	0.2751	-0.0136	0.0016	6.756e-18	1130980	9.109e-05	rs12454989	primary
rs8103741	19	2325005	A	0.822	-0.0109	0.0019	5.14e-09	1102850	1.619e-05	rs17883331	primary
rs4807428	19	3237489	C	0.8934	0.0127	0.0023	2.262e-08	1127670	0.002189	rs312927	secondary
rs312927	19	3274770	A	0.1203	-0.0155	0.0022	2.521e-12	1079150	3.481e-05	rs17883331	primary
rs75177132	19	4386911	T	0.0476	0.03	0.0036	5.476e-17	954128	5.182e-05	rs7257285	primary
rs17883331	19	4954455	A	0.1918	-0.0106	0.0018	3.082e-09	1126860	0.0001096	rs12151248	primary
rs8104651	19	9950127	T	0.5596	-0.0101	0.0014	7.74e-13	1130120	8.251e-05	rs7257285	primary
rs118040169	19	13109531	A	0.965	-0.0233	0.0038	1.258e-09	1128270	0.004117	rs12151248	primary
rs12151248	19	13212025	T	0.1141	-0.0139	0.0023	7.543e-10	1087040	0.004117	rs118040169	primary
rs62109939	19	13292263	T	0.8007	-0.0105	0.0019	3.691e-08	966602	7.612e-05	rs8104651	secondary
rs12981405	19	19651577	T	0.1664	-0.0112	0.0019	2.934e-09	1130140	4.662e-05	rs12151248	primary
rs4805531	19	30736378	A	0.7124	0.0119	0.0016	2.084e-14	1126850	5.216e-05	rs7257285	primary
rs117623407	19	32204489	A	0.8536	-0.0121	0.002	2.189e-09	1095390	9.423e-05	rs17883331	primary
rs7257285	19	32981166	C	0.1791	-0.0124	0.0018	1.265e-11	1131840	8.251e-05	rs8104651	primary
rs405509	19	45408836	T	0.4834	0.0079	0.0014	1.691e-08	1124150	0.0001158	rs8104651	secondary
rs76246107	19	50121274	A	0.0941	-0.0159	0.0026	1.193e-09	953723	4.583e-05	rs8104651	primary
rs192436652	19	54960747	T	0.0268	-0.0318	0.0045	2.513e-12	1036420	1.663e-05	rs8104651	primary
rs1408430	20	14917048	C	0.7193	0.0097	0.0016	6.054e-10	1131310	2.412e-05	rs36120534	primary
rs6043521	20	15739745	T	0.6035	-0.0083	0.0014	8.701e-09	1116710	6.034e-05	rs6122735	primary
rs36120534	20	17438121	T	0.1811	0.0101	0.0018	3.091e-08	1131850	6.097e-05	rs6122735	primary
rs2093108	20	19677994	A	0.6851	-0.0083	0.0015	4.515e-08	1131850	0.0001342	rs55640000	secondary
rs55640000	20	22310689	T	0.6472	-0.0094	0.0015	1.364e-10	1129900	7.927e-05	rs1006749	primary
rs6102913	20	41202958	T	0.4845	0.0085	0.0014	1.489e-09	1131850	9.881e-05	rs6122735	primary
rs1006749	20	41716653	A	0.5237	0.008	0.0014	1.568e-08	1115160	7.927e-05	rs55640000	primary
rs4812697	20	41975395	T	0.9248	0.0171	0.0027	1.668e-10	1115900	8.44e-05	rs2024568	primary
rs6065784	20	43717435	C	0.6953	0.0112	0.0015	2.03e-13	1131840	0.0001631	rs2024568	primary
rs2024568	20	44732089	T	0.2535	-0.01	0.0016	6.764e-10	1131850	0.0001631	rs6065784	primary
rs6122735	20	47523732	T	0.3943	0.0082	0.0014	1.041e-08	1131850	0.0001617	rs6020560	primary
rs6020560	20	49119419	T	0.5258	-0.0082	0.0014	4.409e-09	1131300	0.0001617	rs6122735	primary
rs6068290	20	51268565	A	0.655	-0.0083	0.0015	1.986e-08	1131860	7.109e-05	rs6043521	secondary
rs911149	20	58214637	T	0.2357	0.0091	0.0017	3.502e-08	1131860	4.193e-05	rs6043521	primary
rs6028083	20	59838099	T	0.3838	-0.0128	0.0014	9.957e-19	1130090	0.0001409	rs6122735	primary
rs2824981	21	20034898	A	0.7292	-0.0087	0.0016	4.105e-08	1129430	1.81e-05	rs9978563	secondary
rs232499	21	22736413	A	0.6334	-0.0091	0.0015	4.637e-10	1131850	8.836e-05	rs9978563	primary
rs1544	21	33085585	A	0.2636	-0.0098	0.0016	8.313e-10	1131040	0.0005167	rs56140206	primary
rs56140206	21	34292374	T	0.6962	0.009	0.0015	3.108e-09	1131060	0.0005167	rs1544	primary
rs61739710	21	34925689	A	0.2813	-0.0097	0.0016	8.67e-10	1094410	0.0002001	rs9978563	primary
rs9978563	21	35253918	T	0.4755	0.0086	0.0014	1.046e-09	1131050	0.0004845	rs56140206	primary
rs9974899	21	42006441	T	0.2538	-0.0092	0.0016	1.662e-08	1111990	7.519e-05	rs2837999	primary
rs2837999	21	42630531	A	0.3227	0.0135	0.0015	2.46e-19	1131000	0.0001053	rs744507	primary
rs8130074	21	46498684	C	0.3504	-0.0086	0.0015	4.979e-09	1127780	0.0001319	rs744507	primary
rs744507	21	47051787	C	0.6279	-0.0091	0.0015	4.824e-10	1115970	0.0001319	rs8130074	primary
rs737945	22	30202774	C	0.4442	-0.0117	0.0014	1.228e-16	1131820	5.271e-05	rs5757730	primary
rs5997842	22	31416033	T	0.2749	0.0091	0.0016	7.356e-09	1124790	0.0007995	rs737945	secondary
rs5754581	22	33910736	T	0.5542	-0.0085	0.0014	1.863e-09	1130130	0.0002443	rs5754738	primary
rs5754738	22	34280249	A	0.2863	0.0124	0.0016	1.392e-15	1130110	0.0002443	rs5754581	primary
rs11703948	22	38817047	A	0.9026	-0.0168	0.0024	1.306e-12	1127450	2.882e-05	rs5757730	primary
rs5757730	22	39967430	A	0.4875	0.009	0.0014	1.977e-10	1122480	0.000157	rs1024374	primary
rs137091	22	42982572	C	0.8654	-0.0127	0.0021	6.508e-10	1129900	3.184e-05	rs1024374	primary
rs1024374	22	51149320	C	0.5338	0.013	0.0014	6.521e-20	1110550	0.000157	rs5757730	primary

## Sheet: 4. X Meta
Supplementary Table 4. Association results for the 10 SNPs that reached genome-wide significance in meta-analysis of 23andMe and UKB
SNP	Chr	Position	Allele 1	Allele2	Frequency Allele 1	N	Z_unadj	SE_unadj	P_unadj	Hetero I2	Hetero P	UKB_DAF	Effect Size	SE	Z	P value	Closest gene
rs17331777	X	102362908	A	G	0.734	694894	5.798	0.0019	6.717e-09	0	0.8123	0.0037	0.0111	0.0022	5.496	3.89e-08	NXF3
rs3126258	X	55554810	A	C	0.7073	694894	6.381	0.0019	1.754e-10	70.8	0.0643	0.0038	0.0119	0.0021	6.048	1.463e-09	USP51
rs1507220	X	34102712	A	C	0.3013	694894	-6.523	0.0018	6.882e-11	0	0.4632	0.0015	-0.0121	0.0021	-6.183	6.289e-10	FAM47A
rs5975438	X	133166146	C	G	0.3274	694894	5.794	0.0018	6.855e-09	11.7	0.2872	-0.0029	0.0105	0.002	5.492	3.974e-08	GPC3
rs12845470	X	34384464	A	G	0.4619	694894	7.935	0.0017	2.113e-15	0	0.8671	-0.0011	0.0135	0.0019	7.521	5.418e-14	FAM47A
rs12384986	X	53795625	A	G	0.4551	694894	6.604	0.0017	3.997e-11	0	0.708	-0.0023	0.0112	0.0019	6.26	3.855e-10	HUWE1
rs242912	X	131745311	A	G	0.6618	694894	6.37	0.0018	1.885e-10	0	0.9763	0.0013	0.0114	0.002	6.038	1.561e-09	MBNL3
rs17248169	X	20876199	A	G	0.9447	694894	-6.09	0.0037	1.127e-09	27.3	0.2409	-9e-05	-0.0226	0.0042	-5.773	7.807e-09	CNKSR2
rs2073236	X	135378382	T	C	0.121	694894	-5.907	0.0026	3.488e-09	37.2	0.2071	0.0011	-0.0154	0.0029	-5.599	2.154e-08	GPR112
rs4829750	X	132122783	A	G	0.5039	694894	7.54	0.0017	4.697e-14	0	0.3767	0.0016	0.0128	0.0019	7.147	8.868e-13	HS6ST2
Notes: Clumping of GWAS results was performed as described in the Supplementary Notes. SNPs are ordered by P values. Chromosome (CHR) and base pair (BP) positions are reported for human genome build 37 (hg19). "Allele 1" is the allele whose estimated effect size and allele frequency are reported. Standard errors (SE) and P-values are derived from test statistics that have been adjusted by an esti…
References
[1] L. E. L. M. Vissers, C. Gilissen, J. Veltman, Nat. Rev. Genet. 17, 9-18 (2016).

## Sheet: 5. ChiSq by Chr
Supplementary Table 5. Average Test Statistics By Chromosome
Chr	Mean N	Meff	M	Mean χ2 (Adjusted)	#Lead SNPs (Adjusted)	SNP h2	Chr Length	λGC
1	807588	5009	550754	2.44	56	0.0114	248.53	1.893
2	807666	5116	604236	2.92	93	0.0152	243.17	2.133
3	807666	3927	514173	2.867	49	0.0113	197.84	2.077
4	807666	3954	525677	2.3	37	0.0082	190.85	1.816
5	807672	3530	467600	2.582	41	0.0087	180.7	2.038
6	807647	2683	478754	2.484	36	0.0063	170.72	2.005
7	807632	3436	420051	2.486	41	0.008	159.1	1.959
8	807675	2851	402459	2.272	28	0.0058	146.14	1.848
9	807635	3048	308977	2.386	32	0.0067	141.06	1.889
10	807661	2936	366872	2.333	27	0.0062	135.36	1.897
11	807656	1525	359038	2.277	28	0.0031	134.75	1.82
12	807655	2481	344632	2.349	28	0.0053	133.67	1.761
13	807668	2294	268100	2.56	23	0.0056	96.05	1.889
14	807655	1988	235616	2.397	20	0.0044	87.06	1.93
15	807645	1991	201486	2.176	16	0.0038	82.42	1.828
16	807622	2555	219230	2.516	29	0.0061	90.09	1.951
17	807614	1570	185948	3.602	16	0.0062	81.11	1.726
18	807664	2140	206424	2.594	22	0.0053	77.98	1.84
19	807539	1453	154761	1.733	12	0.0018	58.86	1.511
20	807638	1847	160716	2.202	9	0.0036	62.89	1.905
21	807647	1155	99104	1.878	5	0.0017	33.64	1.555
22	807595	1148	95332	2.131	8	0.0021	34.36	1.751
X	694791	1309	256643	2.862	12	0.0035	152.22	2.181
Notes: All calculations are based on meta-analysis of 23andMe and UK Biobank. Mean N: average sample size for SNPs that passed sample-size filters. Meff: number of effective loci. M: number of SNPs used to estimate Meff. Mean 𝜒2(Adjusted): average test statistic for SNPs with MAF > 1%, after adjustment for sample-size differences across chromosomes. #Lead SNPs: number of approximately independent…

## Sheet: 6. DEPICT Tissues
Supplementary Table 6. Tissue-specific expression of genes in DEPICT-defined loci
MeSH term	Name	MeSH first level term	MeSH second level term	Nominal P-value	False discovery rate	Z-score gene 1	Z-score gene 2	Z-score gene 3	Z-score gene 4	Z-score gene 5	Z-score gene 6	Z-score gene 7	Z-score gene 8	Z-score gene 9	Z-score gene 10	Z-score gene 11	Z-score gene 12	Z-score gene 13	Z-score gene 14	Z-score gene 15	Z-score gene 16	Z-score gene 17	Z-score gene 18	Z-score gene 19	Z-score gene 20	Z-score gene 21	Z-score gene 22	Z-score gene 23	Z-score gene 24	Z-score gene 25
A08.186.211.464.405	Hippocampus	Nervous System	Central Nervous System	1.87e-24	<0.01	CABP7 (6.4)	ENSG00000224116 (5.4)	LRRC7 (4.5)	GRIA1 (4.4)	FAM19A1 (4.1)	CACNA1E (4.0)	CDH9 (4.0)	FBXL16 (4.0)	NECAB1 (3.9)	CAMKV (3.9)	B3GAT2 (3.9)	CAMK2A (3.9)	CDH8 (3.8)	CACNG3 (3.8)	HS3ST4 (3.8)	SORCS3 (3.7)	PIRT (3.7)	NEUROD2 (3.7)	ENSG00000117598 (3.7)	PPM1E (3.7)	CHRM1 (3.6)	NCAM2 (3.6)	EPHA5 (3.6)	ERC2 (3.6)	DCC (3.6)
A08.186.211	Brain	Nervous System	Central Nervous System	2.46e-24	<0.01	GFAP (2.9)	BCAN (2.9)	TBR1 (2.8)	LINC00461 (2.6)	C1QL1 (2.6)	ENSG00000237457 (2.6)	CSPG5 (2.5)	ARC (2.5)	POU3F2 (2.5)	C1orf61 (2.5)	LHFPL3 (2.5)	CRB1 (2.4)	NPAS3 (2.4)	SORCS3 (2.4)	KCNIP1 (2.4)	SOX2-OT (2.4)	CTNND2 (2.4)	DSCAM (2.3)	NTRK2 (2.3)	LRP1B (2.3)	SOX8 (2.3)	TTYH1 (2.3)	NECAB1 (2.3)	GPM6A (2.3)	ENSG00000177453 (2.3)
A08.186.211.464	Limbic System	Nervous System	Central Nervous System	2.78e-24	<0.01	LRRC7 (4.1)	CDH8 (4.1)	CACNA1E (4.0)	CDH9 (4.0)	CACNG3 (3.9)	ENSG00000224116 (3.8)	FAM19A1 (3.8)	CAMKV (3.8)	SORCS3 (3.8)	FBXL16 (3.7)	RASL10A (3.7)	GRIA1 (3.6)	CHRM1 (3.6)	CAMK2A (3.6)	NECAB1 (3.6)	SLITRK1 (3.6)	GPR123 (3.6)	ENSG00000117598 (3.6)	HS3ST4 (3.5)	TBR1 (3.5)	CELF5 (3.5)	SHC3 (3.5)	LHX2 (3.5)	GRM7 (3.4)	ADCY2 (3.4)
A08.186	Central Nervous System	Nervous System	Central Nervous System	3.54e-24	<0.01	GFAP (2.9)	BCAN (2.8)	TBR1 (2.7)	LINC00461 (2.5)	C1QL1 (2.5)	ENSG00000237457 (2.5)	CSPG5 (2.5)	ARC (2.5)	POU3F2 (2.5)	C1orf61 (2.5)	LHFPL3 (2.4)	NPAS3 (2.4)	CRB1 (2.4)	SOX2-OT (2.4)	SORCS3 (2.4)	KCNIP1 (2.4)	CTNND2 (2.4)	NTRK2 (2.3)	DSCAM (2.3)	TTYH1 (2.3)	SOX8 (2.3)	LRP1B (2.3)	NECAB1 (2.3)	GPM6A (2.3)	ENSG00000177453 (2.2)
A08.186.211.730.885.287.500	Cerebral Cortex	Nervous System	Central Nervous System	3.92e-24	<0.01	FAM19A1 (3.8)	CDH9 (3.8)	LRRC7 (3.8)	CACNA1E (3.7)	CACNG3 (3.6)	CDH8 (3.6)	CHRM1 (3.5)	CAMK2A (3.5)	GPR123 (3.5)	CAMKV (3.5)	SLITRK1 (3.5)	RASL10A (3.5)	VSTM2A (3.5)	LHX2 (3.5)	NECAB1 (3.4)	SORCS3 (3.4)	HS3ST4 (3.4)	ENSG00000117598 (3.4)	RFPL1-AS1 (3.4)	GRM7 (3.4)	KIAA1239 (3.4)	TBR1 (3.4)	CELF5 (3.4)	NELL1 (3.4)	FAM19A2 (3.3)
A08.186.211.730.885.287	Cerebrum	Nervous System	Central Nervous System	7.05e-24	<0.01	LRRC7 (3.7)	CACNA1E (3.6)	FAM19A1 (3.6)	CDH9 (3.6)	CACNG3 (3.5)	CDH8 (3.5)	CAMK2A (3.5)	CHRM1 (3.4)	CAMKV (3.4)	SLITRK1 (3.4)	NECAB1 (3.3)	RASL10A (3.3)	GPR123 (3.3)	LHX2 (3.3)	VSTM2A (3.3)	SORCS3 (3.3)	CELF5 (3.3)	HS3ST4 (3.3)	ENSG00000117598 (3.3)	RFPL1-AS1 (3.3)	GRM7 (3.2)	SHC3 (3.2)	GRM5 (3.2)	NELL1 (3.2)	FBXL16 (3.2)
A08.186.211.464.710	Parahippocampal Gyrus	Nervous System	Central Nervous System	8.21e-24	<0.01	CNTN5 (4.5)	CDH8 (4.4)	TBR1 (4.4)	LRRC7 (4.2)	CACNG3 (4.2)	CACNA1E (4.2)	CNTNAP5 (4.1)	CDH9 (4.1)	SORCS3 (4.0)	FBXL16 (3.9)	CHRM1 (3.9)	SHC3 (3.9)	ADCY2 (3.9)	CAMKV (3.9)	RASL10A (3.9)	PTPRT (3.8)	SLITRK1 (3.8)	GABRA4 (3.8)	DDN (3.8)	FAM19A1 (3.7)	CELF5 (3.7)	LHX2 (3.7)	NECAB1 (3.7)	GPC5 (3.7)	ENSG00000117598 (3.7)
A08.186.211.730.885	Telencephalon	Nervous System	Central Nervous System	9.87e-24	<0.01	LRRC7 (3.6)	CACNA1E (3.6)	FAM19A1 (3.5)	CACNG3 (3.5)	CDH9 (3.5)	CDH8 (3.4)	CAMK2A (3.4)	CAMKV (3.4)	SLITRK1 (3.4)	CHRM1 (3.3)	NECAB1 (3.3)	RASL10A (3.3)	LHX2 (3.3)	GPR123 (3.3)	VSTM2A (3.3)	HS3ST4 (3.2)	CELF5 (3.2)	SORCS3 (3.2)	ENSG00000117598 (3.2)	RFPL1-AS1 (3.2)	GRM7 (3.2)	SHC3 (3.2)	GRM5 (3.2)	NELL1 (3.2)	FBXL16 (3.1)
A08.186.211.730.885.287.500.863	Temporal Lobe	Nervous System	Central Nervous System	4.21e-23	<0.01	TBR1 (4.5)	CDH8 (4.3)	CACNG3 (4.2)	CNTN5 (4.1)	CNTNAP5 (4.1)	LRRC7 (4.1)	CACNA1E (4.0)	CDH9 (4.0)	SHC3 (4.0)	SLITRK1 (3.9)	RASL10A (3.9)	CHRM1 (3.9)	FBXL16 (3.8)	CAMKV (3.8)	SORCS3 (3.8)	ADCY2 (3.8)	PTPRT (3.8)	GABRA4 (3.8)	DDN (3.8)	CAMK2A (3.7)	NECAB1 (3.7)	CELF5 (3.7)	FAM19A1 (3.7)	LHX2 (3.7)	ENSG00000117598 (3.6)
A08.186.211.132	Brain Stem	Nervous System	Central Nervous System	1.72e-22	<0.01	GABRA6 (5.0)	ZIC1 (4.9)	KLHL1 (4.8)	RIMS1 (4.6)	SLC35F4 (4.5)	CDH7 (4.5)	C18orf42 (4.3)	DAO (4.3)	ETV1 (4.2)	UNC13C (4.2)	FSTL5 (4.2)	GRIA4 (4.2)	GALNT13 (4.1)	RIT2 (3.9)	GRM1 (3.9)	C15orf27 (3.9)	TRPM3 (3.9)	MYT1 (3.9)	NDST3 (3.8)	KCNJ3 (3.7)	KLC2 (3.7)	CA10 (3.6)	FGF14 (3.6)	MAP6D1 (3.6)	NRXN3 (3.6)
A08.186.211.730	Prosencephalon	Nervous System	Central Nervous System	2.02e-22	<0.01	LRRC7 (3.2)	CDH8 (3.2)	CAMKV (3.2)	CACNA1E (3.2)	CACNG3 (3.1)	NECAB1 (3.1)	FAM19A1 (3.1)	SLITRK1 (3.1)	CAMK2A (3.1)	RASL10A (3.1)	GPR123 (3.0)	CDH9 (3.0)	CELF5 (3.0)	GABRB1 (3.0)	SHC3 (3.0)	GRM7 (3.0)	HS3ST4 (2.9)	NELL1 (2.9)	ANKS1B (2.9)	RFPL1-AS1 (2.9)	SORCS3 (2.9)	CHRM1 (2.9)	FBXL16 (2.9)	VSTM2A (2.9)	GRM5 (2.9)
A08.186.211.865	Rhombencephalon	Nervous System	Central Nervous System	1.12e-21	<0.01	GABRA6 (7.3)	ZIC1 (6.7)	C18orf42 (6.5)	RIMS1 (6.4)	SLC35F4 (6.2)	CDH7 (5.8)	ETV1 (5.8)	GRM1 (5.7)	C15orf27 (5.6)	UNC13C (5.5)	GRIA4 (5.2)	SLC26A10 (5.2)	FSTL5 (5.1)	NDST3 (5.1)	GALNT13 (5.1)	MYT1 (5.0)	ENSG00000233593 (5.0)	KCNJ3 (5.0)	DAO (5.0)	KLHL1 (4.9)	RIT2 (4.9)	KLC2 (4.8)	CALB1 (4.8)	FGF14 (4.7)	REV1 (4.7)
A08.186.211.730.885.287.500.571	Occipital Lobe	Nervous System	Central Nervous System	1.3e-21	<0.01	ENSG00000250377 (5.9)	ENSG00000244967 (5.6)	ENSG00000248840 (5.4)	ENSG00000232825 (5.4)	ENSG00000233723 (5.4)	ENSG00000254377 (5.2)	VSTM2A (5.1)	DCLK3 (5.0)	SCN1A (5.0)	CIT (4.9)	SLC35E2 (4.9)	KCNH5 (4.9)	C11orf87 (4.8)	HTR2A (4.7)	FAM78B (4.7)	TMEM155 (4.6)	LRRTM4 (4.5)	HEATR4 (4.5)	FAM19A2 (4.5)	RGS7BP (4.4)	DSCAM (4.3)	MNT (4.2)	FAM19A1 (4.1)	KCNS1 (4.1)	ARHGEF26-AS1 (4.0)
A08.186.211.132.810.428.200	Cerebellum	Nervous System	Central Nervous System	8.27e-21	<0.01	GABRA6 (8.2)	ZIC1 (7.4)	C18orf42 (7.3)	RIMS1 (7.0)	SLC35F4 (6.7)	ETV1 (6.4)	GRM1 (6.3)	CDH7 (6.2)	C15orf27 (6.2)	UNC13C (6.0)	SLC26A10 (5.8)	ENSG00000233593 (5.8)	NDST3 (5.6)	GRIA4 (5.5)	MYT1 (5.5)	KCNJ3 (5.4)	GALNT13 (5.4)	FSTL5 (5.4)	REV1 (5.3)	KLC2 (5.2)	DAO (5.2)	EPHB1 (5.2)	ZNF238 (5.2)	CALB1 (5.1)	MSRA (5.1)
A08.186.211.730.885.287.500.571.735	Visual Cortex	Nervous System	Central Nervous System	1.28e-20	<0.01	ENSG00000250377 (6.6)	ENSG00000244967 (6.1)	ENSG00000248840 (6.0)	ENSG00000232825 (5.9)	ENSG00000233723 (5.8)	DCLK3 (5.5)	SLC35E2 (5.4)	ENSG00000254377 (5.3)	VSTM2A (5.2)	KCNH5 (5.2)	SCN1A (5.1)	CIT (5.1)	C11orf87 (4.9)	HEATR4 (4.9)	FAM78B (4.8)	TMEM155 (4.7)	MNT (4.7)	HTR2A (4.7)	LRRTM4 (4.6)	RGS7BP (4.6)	ENSG00000229348 (4.5)	FAM19A2 (4.5)	DSCAM (4.5)	CNTN5 (4.3)	BEAN1 (4.3)
A08.186.211.730.885.287.500.670	Parietal Lobe	Nervous System	Central Nervous System	4.76e-17	<0.01	ENSG00000231064 (4.9)	ENHO (4.6)	ARC (4.6)	CABP1 (4.3)	ENSG00000203876 (4.1)	HIGD1B (4.0)	ENSG00000237457 (3.9)	GABRG1 (3.9)	C1QL1 (3.9)	KLHL32 (3.9)	LHPP (3.9)	FAHD2B (3.9)	BCAN (3.9)	GPC5 (3.9)	LHX2 (3.9)	ENSG00000177133 (3.8)	RANBP3L (3.7)	LMO3 (3.6)	PAQR6 (3.6)	C2orf82 (3.6)	CTNNA2 (3.6)	TMEM155 (3.6)	GRID1 (3.6)	ARHGEF26-AS1 (3.5)	GFAP (3.5)
A09.371.729	Retina	Sense Organs	Eye	2.05e-16	<0.01	NRL (12.4)	POU4F2 (12.3)	ENSG00000248550 (12.3)	OPN1SW (11.7)	RD3 (11.5)	ATOH7 (11.4)	GNAT1 (11.0)	TULP1 (9.5)	LHX9 (8.3)	OTX2 (8.2)	SORCS1 (7.6)	GNAT2 (7.2)	GABRR1 (7.0)	CRB1 (6.8)	PDE6C (6.6)	SIX6 (6.5)	TFAP2B (6.3)	DRD1 (6.1)	SIX3 (6.1)	ROM1 (6.1)	SOX11 (5.9)	POU4F1 (5.8)	PCBP3 (5.7)	DCC (5.6)	LINC00348 (5.5)
A08.186.211.730.885.287.249	Basal Ganglia	Nervous System	Central Nervous System	7.15e-12	<0.01	CDH20 (7.3)	ENSG00000224849 (6.8)	SYNDIG1L (6.2)	GPR75 (6.0)	CADM2-AS1 (5.4)	ODZ3 (5.2)	DRD1 (5.0)	ST18 (4.9)	ENSG00000236502 (4.8)	MLL2 (4.8)	ENSG00000233334 (4.6)	TULP4 (4.5)	CACNG7 (4.5)	OTUD7B (4.5)	ENSG00000247228 (4.4)	ENSG00000251575 (4.4)	ENSG00000255650 (4.4)	EPN2-AS1 (4.3)	ENSG00000231064 (4.3)	GRM5 (4.3)	SMCR5 (4.2)	ENSG00000246747 (4.2)	LINC00290 (4.2)	SLC24A2 (4.2)	POLR2A (4.2)
A11.872.653	Neural Stem Cells	Cells	Stem Cells	1.71e-10	<0.01	DLX6-AS1 (9.4)	ST8SIA5 (6.9)	DLX2 (6.8)	ENSG00000247416 (6.6)	SALL3 (6.5)	PTPRO (5.8)	KCNIP1 (5.8)	CDH4 (5.6)	SOX11 (5.6)	PHF21B (5.5)	PCDHGC3 (5.1)	ALK (5.0)	COL23A1 (4.9)	STK32B (4.9)	DLX6 (4.8)	DLX5 (4.5)	MMAB (4.4)	ARC (4.3)	LHFPL3 (4.2)	FOXG1 (4.1)	RGS17 (4.1)	GABRG3 (4.1)	SPRY4 (4.0)	POU3F2 (4.0)	PTPN9 (4.0)
A08.186.211.730.885.287.249.487	Corpus Striatum	Nervous System	Central Nervous System	5.06e-09	<0.01	CDH20 (10.6)	ENSG00000224849 (9.9)	CADM2-AS1 (8.2)	GPR75 (7.9)	SYNDIG1L (7.7)	MLL2 (7.1)	ENSG00000247228 (7.0)	ST18 (6.8)	ENSG00000236502 (6.7)	DRD1 (6.5)	ODZ3 (6.5)	PKD2L2 (6.5)	ENSG00000255650 (6.5)	ENSG00000233334 (6.3)	PRDM7 (6.2)	POLR2A (6.1)	OTUD7B (6.1)	ENSG00000234323 (6.0)	C8orf45 (6.0)	EPN2-AS1 (5.9)	EYS (5.9)	TULP4 (5.9)	ENSG00000251575 (5.8)	ENSG00000250156 (5.8)	FUT9 (5.8)
A08.186.211.730.885.287.500.270	Frontal Lobe	Nervous System	Central Nervous System	3.51e-08	<0.01	C7orf51 (5.6)	ZNF804B (5.2)	TBR1 (5.0)	TMEM155 (4.7)	TMEM26 (4.7)	CABP1 (4.6)	ENSG00000232377 (4.4)	ENSG00000225953 (4.4)	ENSG00000225768 (4.4)	FAM19A2 (4.3)	C6orf208 (4.3)	SNX32 (4.3)	C11orf87 (4.3)	LINGO1 (4.3)	KCNJ4 (4.3)	CTXN3 (4.1)	ENSG00000258779 (4.1)	LMO3 (4.1)	OR10D3 (4.1)	ZNF365 (4.0)	GRIN3A (4.0)	CACNG3 (4.0)	SLITRK1 (4.0)	ENSG00000251455 (4.0)	PTPRT (4.0)
A08.186.211.653	Mesencephalon	Nervous System	Central Nervous System	5.28e-07	<0.01	TH (8.7)	LUZP2 (6.7)	PIRT (6.0)	HS3ST5 (5.7)	HAPLN2 (5.4)	ENSG00000238217 (4.9)	SLC5A11 (4.8)	C2orf82 (4.7)	KLHL1 (4.5)	GPR62 (4.4)	ABCA2 (4.3)	LHPP (4.3)	CARNS1 (4.3)	FAM125B (4.1)	C5orf64 (4.1)	HCRTR2 (4.1)	NXPH2 (4.0)	PAQR6 (3.9)	POU4F2 (3.8)	FBXL18 (3.7)	RGS6 (3.7)	CHADL (3.6)	ENSG00000225768 (3.6)	PRIMA1 (3.6)	LHFPL3 (3.6)
A08.186.211.730.317	Diencephalon	Nervous System	Central Nervous System	2.82e-05	<0.01	MYO15A (3.8)	ABCA2 (3.7)	DRD2 (3.6)	POU1F1 (3.5)	CSH2 (3.5)	GH2 (3.5)	GAL3ST3 (3.3)	C12orf34 (3.2)	CAMK2N2 (3.2)	ECE2 (3.2)	PTPRN (3.1)	CNIH2 (3.1)	RTBDN (3.1)	ATG13 (3.1)	C21orf62 (3.1)	HMGXB3 (3.1)	SIX6 (3.0)	GPR62 (3.0)	SYNDIG1L (3.0)	C7orf52 (3.0)	LINC00315 (3.0)	IPO13 (3.0)	SEZ6L (3.0)	ENSG00000245651 (3.0)	TFAP4 (3.0)
A06.407.071	Adrenal Glands	Endocrine System	Endocrine Glands	6.62e-05	<0.01	CYP17A1 (8.6)	MC2R (7.3)	LINC00473 (7.3)	ASB4 (6.7)	FAM19A4 (5.4)	CLRN1 (5.3)	AS3MT (5.3)	TH (5.1)	AGRP (5.0)	ENSG00000223403 (4.8)	IKBKAP (4.5)	GSTA3 (4.4)	FDX1 (4.4)	ENSG00000259134 (4.1)	SCAP (4.0)	MYO7A (3.7)	FAM43B (3.7)	ST8SIA5 (3.6)	BRE (3.5)	TM7SF2 (3.5)	POR (3.4)	DMAP1 (3.3)	AKR1B1 (3.3)	ZNF503 (3.2)	LAMC3 (3.2)
A08.186.211.730.317.357	Hypothalamus	Nervous System	Central Nervous System	7.54e-05	<0.01	POU1F1 (5.7)	GH2 (5.3)	MYO15A (5.2)	CSH2 (5.2)	SIX6 (5.0)	GAL3ST3 (4.7)	C21orf62 (4.4)	DRD2 (4.4)	ECE2 (4.3)	PTPRN (4.1)	RTBDN (4.0)	SEZ6L (3.5)	KCNC2 (3.5)	ATG13 (3.5)	CNIH2 (3.4)	SPAG16 (3.4)	PTPN23 (3.4)	DTX3 (3.4)	PRR12 (3.3)	PTPRN2 (3.3)	FOXO6 (3.3)	HMGXB3 (3.3)	WDR6 (3.3)	CCDC24 (3.2)	ZDHHC8 (3.2)
A08.713	Neurosecretory Systems	Nervous System	Neurosecretory Systems	0.000675	<0.01	POU1F1 (7.1)	GH2 (6.4)	SIX6 (6.2)	CSH2 (6.2)	MYO15A (6.1)	GAL3ST3 (5.4)	C21orf62 (5.1)	DRD2 (4.8)	PTPRN (4.4)	RTBDN (4.3)	ECE2 (4.2)	KCNC2 (4.1)	FOXO6 (4.1)	SPAG16 (3.9)	PTPN23 (3.8)	WDR6 (3.8)	C14orf39 (3.7)	CCDC24 (3.7)	SEZ6L (3.6)	ATG13 (3.6)	DTX3 (3.6)	TP53BP1 (3.6)	PRR12 (3.5)	CNIH2 (3.5)	SIX3 (3.5)
A06.407.071.140	Adrenal Cortex	Endocrine System	Endocrine Glands	0.000847	<0.01	CYP17A1 (10.3)	MC2R (9.2)	ASB4 (8.4)	LINC00473 (7.7)	FAM19A4 (7.1)	CLRN1 (6.6)	ENSG00000223403 (6.0)	AS3MT (5.7)	AGRP (5.5)	IKBKAP (5.4)	GSTA3 (5.4)	FDX1 (5.3)	ST8SIA5 (4.5)	SCAP (4.4)	FAM43B (4.4)	ENSG00000259134 (4.4)	MYO7A (4.4)	DMAP1 (4.2)	TM7SF2 (4.1)	BRE (4.0)	POR (4.0)	POLK (3.9)	C10orf11 (3.8)	KIF16B (3.8)	ENSG00000252071 (3.7)
A06.407.312.782	Testis	Endocrine System	Endocrine Glands	0.00186	<0.01	ENSG00000258551 (9.0)	GIP (8.8)	PIWIL1 (8.5)	ZPBP (8.3)	ENSG00000245424 (7.6)	ENSG00000257501 (7.5)	DAND5 (7.2)	C9orf93 (6.9)	ENSG00000197071 (6.9)	ENSG00000246422 (6.7)	ENSG00000227809 (6.6)	ENSG00000258220 (6.6)	STK31 (6.6)	RAD9B (6.6)	ENSG00000249382 (6.5)	SPACA1 (6.5)	ENSG00000228560 (6.3)	ENSG00000226754 (6.3)	C8orf45 (6.1)	C10orf140 (6.0)	LINC00305 (6.0)	PCDH15 (5.7)	ENSG00000232377 (5.7)	ENSG00000233848 (5.6)	ENSG00000241409 (5.5)
A10.336.707	Prostate	Tissues	Exocrine Glands	0.07	>=0.20	PCGEM1 (8.9)	TGM4 (8.1)	ENSG00000234715 (8.0)	RFPL1 (7.8)	ENSG00000245750 (6.8)	NPY (6.1)	TIGD6 (6.0)	ENSG00000243150 (5.6)	PART1 (5.6)	ZNF613 (5.5)	OAZ3 (5.2)	ACPP (5.2)	C15orf33 (4.9)	FSIP2 (4.8)	ENSG00000232377 (4.6)	TMEFF2 (4.6)	CREB3L4 (4.6)	ENSG00000255458 (4.6)	GABRG3 (4.5)	ENTPD5 (4.4)	ARHGEF26 (4.2)	ENSG00000250288 (4.2)	ZCWPW2 (4.0)	LENG9 (4.0)	C10orf95 (3.9)
A05.360.444	Genitalia Male	Urogenital System	Genitalia	0.09	>=0.20	PCGEM1 (6.6)	TGM4 (6.1)	ENSG00000234715 (5.9)	RFPL1 (5.9)	TIGD6 (5.0)	ENSG00000245750 (5.0)	ENSG00000243150 (4.6)	NPY (4.5)	C15orf33 (4.2)	PART1 (4.1)	ZNF613 (4.0)	ENSG00000232377 (4.0)	ENSG00000255458 (4.0)	OAZ3 (4.0)	ACPP (3.9)	FSIP2 (3.9)	TMEFF2 (3.4)	ARHGEF26 (3.4)	CREB3L4 (3.4)	ZCWPW2 (3.3)	GABRG3 (3.3)	ENTPD5 (3.3)	ENSG00000250288 (3.3)	C8orf45 (3.3)	LENG9 (3.2)
A11.872.378.294	Lymphoid Progenitor Cells	Cells	Stem Cells	0.11	>=0.20	USP8 (6.4)	TAPT1 (5.9)	FAM3C (5.6)	UBE2I (5.4)	ENSG00000257242 (5.4)	NEIL1 (5.3)	ENSG00000251023 (5.2)	ENSG00000247982 (5.2)	SNRNP200 (4.8)	C5orf44 (4.8)	MDM4 (4.8)	DDX19B (4.8)	ENSG00000257568 (4.6)	ENSG00000073169 (4.6)	SNX29 (4.5)	INTS10 (4.5)	DCAF4 (4.4)	GGNBP2 (4.4)	SCAF4 (4.4)	ENSG00000229348 (4.4)	RANBP10 (4.3)	HSF5 (4.3)	AFF3 (4.2)	C9orf38 (4.2)	HNRNPK (4.2)
A10.336	Exocrine Glands	Tissues	Exocrine Glands	0.11	>=0.20	PCGEM1 (8.1)	TGM4 (7.5)	ENSG00000234715 (7.4)	RFPL1 (7.2)	ENSG00000245750 (6.2)	NPY (5.6)	TIGD6 (5.5)	PART1 (5.3)	ENSG00000243150 (5.1)	ZNF613 (5.0)	OAZ3 (4.9)	ACPP (4.7)	C15orf33 (4.6)	FSIP2 (4.5)	CREB3L4 (4.4)	ENSG00000232377 (4.3)	TMEFF2 (4.2)	ENSG00000255458 (4.2)	GABRG3 (4.1)	ENTPD5 (4.0)	ARHGEF26 (3.9)	LENG9 (3.9)	ENSG00000250288 (3.9)	ZCWPW2 (3.8)	SETD8 (3.6)
A10.165.114.830	Adipose Tissue White	Tissues	Connective Tissue	0.21	>=0.20	LEP (5.6)	C18orf34 (5.1)	ENSG00000236333 (5.0)	EBF2 (4.5)	SIK2 (4.5)	KCNIP2 (4.4)	SEMA3G (4.3)	PTGER3 (3.8)	NPY1R (3.8)	DARC (3.7)	MYOC (3.7)	PDE3B (3.6)	C20orf160 (3.6)	ENSG00000234635 (3.5)	CALB2 (3.4)	LPL (3.4)	ACADL (3.4)	ENSG00000230333 (3.3)	EBF1 (3.3)	VEGFB (3.3)	DMRT2 (3.3)	LHCGR (3.2)	HOOK2 (3.2)	COL5A3 (3.2)	SVEP1 (3.2)
A11.329.114	Adipocytes	Cells	Connective Tissue Cells	0.24	>=0.20	ENSG00000230333 (5.0)	HCAR1 (4.4)	ENSG00000224738 (4.2)	ELOVL3 (4.1)	SIK2 (4.1)	NEXN-AS1 (3.9)	LEP (3.9)	ENSG00000232377 (3.4)	PLXNA4 (3.4)	PDP2 (3.4)	ENSG00000225399 (3.3)	PTGER3 (3.3)	ENSG00000255100 (3.3)	PDE3B (3.2)	FGF7 (3.2)	C3orf71 (3.2)	ETFA (3.2)	LAMA4 (3.1)	LPL (3.0)	NR1H3 (3.0)	C6orf57 (2.9)	SLC7A6 (2.9)	TMEM120A (2.9)	SEMA3G (2.9)	FGF10 (2.8)
A10.165.114.830.500	Abdominal Fat	Tissues	Connective Tissue	0.26	>=0.20	LEP (5.9)	ENSG00000236333 (5.5)	C18orf34 (5.5)	KCNIP2 (5.1)	SIK2 (5.1)	SEMA3G (4.7)	EBF2 (4.3)	PTGER3 (4.1)	PDE3B (3.9)	C20orf160 (3.9)	NPY1R (3.9)	LHCGR (3.8)	SIM1 (3.8)	CALB2 (3.7)	ENSG00000230333 (3.7)	ENSG00000234635 (3.7)	VEGFB (3.7)	COL5A3 (3.7)	PC (3.6)	ACADL (3.6)	DARC (3.6)	MYOC (3.6)	HOOK2 (3.6)	LPL (3.5)	SOX18 (3.4)
A11.872.190	Embryonic Stem Cells	Cells	Stem Cells	0.26	>=0.20	PRTG (6.7)	ENSG00000254602 (6.2)	OTX2 (5.3)	SOX11 (4.7)	LINC00458 (4.6)	C10orf140 (4.4)	FOXH1 (4.3)	ENSG00000256232 (4.3)	TERF1 (4.1)	TET1 (4.1)	SP8 (4.0)	ENSG00000250337 (3.7)	MBD2 (3.7)	SYT6 (3.6)	SALL3 (3.5)	VASH2 (3.5)	ENSG00000250131 (3.5)	SRSF12 (3.4)	LCTL (3.3)	CA14 (3.3)	EPHA7 (3.2)	RMST (3.2)	AASS (3.2)	ENSG00000259129 (3.1)	DNA2 (3.1)
A10.165.114	Adipose Tissue	Tissues	Connective Tissue	0.27	>=0.20	LEP (5.3)	C18orf34 (4.5)	EBF2 (4.5)	ENSG00000236333 (4.4)	SIK2 (4.2)	SEMA3G (4.0)	KCNIP2 (3.9)	PTGER3 (3.6)	DARC (3.6)	NPY1R (3.5)	C20orf160 (3.3)	MYOC (3.3)	LPL (3.2)	CALB2 (3.2)	PDE3B (3.2)	EBF1 (3.1)	ENSG00000234635 (3.1)	ACADL (3.0)	VEGFB (3.0)	SVEP1 (3.0)	COL5A3 (3.0)	ENSG00000230333 (3.0)	HOOK2 (2.9)	ANGPTL2 (2.9)	LAMA4 (2.9)
A07.541.358.100	Atrial Appendage	Cardiovascular System	Heart	0.32	>=0.20	TECRL (6.6)	KCNMB2 (6.6)	C1orf105 (6.6)	DAND5 (6.2)	RBM20 (5.6)	FSD2 (5.4)	IDI2-AS1 (5.4)	PRKG2 (5.2)	ENSG00000236013 (5.1)	RYR2 (5.1)	MYOM1 (4.9)	RBPMS2 (4.9)	SLC16A7 (4.9)	CKM (4.8)	MYPN (4.7)	ENSG00000253738 (4.7)	STK38L (4.6)	TMEM182 (4.6)	B3GALT2 (4.5)	ENSG00000258824 (4.5)	FGF12 (4.5)	ADAL (4.3)	NDUFA6 (4.3)	CTNNA3 (4.3)	ART3 (4.2)
A02.835.232.834.151	Cervical Vertebrae	Musculoskeletal System	Skeleton	0.33	>=0.20	SOX11 (2.4)	ENSG00000254602 (2.2)	LCTL (2.1)	IRAK1BP1 (2.0)	PRDM16 (2.0)	PRTG (2.0)	ENSG00000250337 (1.9)	LINC00458 (1.9)	MPP6 (1.9)	TERF1 (1.8)	C18orf54 (1.8)	NLN (1.8)	TET1 (1.8)	ZFP64 (1.8)	OTX2 (1.8)	ENSG00000249530 (1.8)	KIAA1524 (1.8)	PENK (1.8)	FZD7 (1.7)	ZBTB3 (1.7)	CDH6 (1.7)	TEX10 (1.7)	TRIM32 (1.7)	C5orf34 (1.6)	SNTG2 (1.6)
A05.360.319.114.630.535	Ovarian Follicle	Urogenital System	Genitalia	0.33	>=0.20	LHCGR (6.0)	ENSG00000228739 (5.8)	WFDC3 (5.7)	NR5A2 (5.5)	HSD17B1 (5.5)	ST3GAL4 (5.1)	WFDC10B (4.4)	AMH (4.3)	GLDN (4.2)	GSTA3 (4.2)	TSHZ2 (4.1)	AQP11 (4.1)	FDX1 (4.0)	FSHR (3.9)	GADD45G (3.9)	LINGO2 (3.9)	NPTX2 (3.7)	UNC5C (3.7)	DHH (3.7)	PSME4 (3.6)	TRPC6 (3.6)	ENSG00000256885 (3.5)	MTMR2 (3.5)	GUCY1A2 (3.4)	SORBS2 (3.4)
A02.835.232.834	Spine	Musculoskeletal System	Skeleton	0.36	>=0.20	SOX11 (2.3)	ENSG00000254602 (2.1)	LCTL (2.0)	IRAK1BP1 (2.0)	PRDM16 (2.0)	PRTG (2.0)	ENSG00000250337 (1.9)	LINC00458 (1.9)	MPP6 (1.8)	TERF1 (1.8)	C18orf54 (1.8)	NLN (1.8)	TET1 (1.8)	ZFP64 (1.8)	OTX2 (1.8)	KIAA1524 (1.8)	ENSG00000249530 (1.8)	PENK (1.8)	FZD7 (1.7)	ZBTB3 (1.7)	CDH6 (1.7)	TEX10 (1.7)	SNTG2 (1.7)	TRIM32 (1.6)	ZZZ3 (1.6)
A07.541.358	Heart Atria	Cardiovascular System	Heart	0.38	>=0.20	TECRL (6.6)	C1orf105 (6.6)	DAND5 (6.3)	KCNMB2 (6.1)	RBM20 (5.5)	FSD2 (5.3)	IDI2-AS1 (5.1)	ENSG00000236013 (5.1)	RYR2 (5.1)	RBPMS2 (4.8)	MYOM1 (4.8)	PRKG2 (4.8)	CKM (4.7)	SLC16A7 (4.7)	MYPN (4.5)	TMEM182 (4.3)	FGF12 (4.3)	ENSG00000253738 (4.3)	STK38L (4.3)	B3GALT2 (4.2)	NDUFS1 (4.1)	ADAL (4.1)	ART3 (4.0)	ENSG00000258824 (4.0)	NDUFA6 (4.0)
A05.360.319.679.690	Myometrium	Urogenital System	Genitalia	0.38	>=0.20	NPAS4 (6.6)	C9orf93 (5.7)	LMOD1 (5.6)	PTGER3 (4.6)	RERG (4.2)	MYLK (4.2)	GUCY1A2 (4.2)	LIMS2 (4.1)	FREM1 (4.1)	ENSG00000256546 (3.9)	SLC26A10 (3.9)	STON1 (3.8)	CACNA1H (3.8)	CACNA1C (3.6)	C1QTNF7 (3.5)	LPP (3.5)	CUX1 (3.4)	C14orf28 (3.4)	PRIMA1 (3.4)	GJC1 (3.2)	LRRN4CL (3.2)	ZNF516 (3.2)	BCHE (3.2)	SYNPO2 (3.1)	FOXP2 (3.1)
A02.165	Cartilage	Musculoskeletal System	Cartilage	0.41	>=0.20	COL9A1 (12.9)	CILP2 (10.8)	COL2A1 (10.6)	SPATA19 (9.0)	PDE10A (7.7)	SOX5P (6.2)	SOX5 (5.6)	ZNF385D (5.2)	PENK (5.2)	XYLT1 (5.0)	CHADL (4.9)	FRZB (4.8)	PITPNC1 (4.6)	SRSF12 (4.6)	FBLN7 (4.5)	SIX4 (4.4)	GPC6 (4.1)	CYP27C1 (4.0)	C1QL1 (3.9)	SEMA6D (3.9)	THBS3 (3.9)	TRPS1 (3.8)	COL16A1 (3.8)	ENSG00000213310 (3.8)	WFDC3 (3.8)
A11.872	Stem Cells	Cells	Stem Cells	0.44	>=0.20	ENSG00000254602 (1.9)	PCGF6 (1.8)	KIAA1524 (1.8)	TBCE (1.8)	TRAIP (1.7)	C5orf34 (1.7)	MCPH1 (1.7)	TIPIN (1.6)	CCDC99 (1.6)	C18orf54 (1.6)	NOL10 (1.6)	CDC6 (1.6)	DEPDC1B (1.6)	RAD51 (1.6)	ERCC8 (1.6)	TET1 (1.6)	BRIP1 (1.6)	DEPDC1 (1.6)	MSH6 (1.6)	SIKE1 (1.6)	DNA2 (1.6)	CENPL (1.6)	SOX11 (1.5)	CDC25A (1.5)	POLA2 (1.5)
A11.872.700	Pluripotent Stem Cells	Cells	Stem Cells	0.44	>=0.20	LINC00458 (8.0)	FOXH1 (7.5)	VASH2 (6.5)	ENSG00000250131 (6.5)	TERF1 (6.4)	LCTL (6.2)	ENSG00000258636 (5.9)	OTX2 (5.6)	ENSG00000249862 (5.5)	SYT6 (5.5)	ENSG00000256232 (5.5)	ZNF589 (5.4)	ENSG00000250337 (5.3)	GRID2 (5.2)	AASS (5.2)	COMMD7 (5.1)	SALL3 (4.9)	MBD2 (4.9)	SNTG2 (4.9)	C18orf54 (4.8)	TET1 (4.8)	ZNF891 (4.4)	CHAF1A (4.4)	SHISA9 (4.4)	TEX14 (4.2)
A09.371	Eye	Sense Organs	Eye	0.44	>=0.20	ENSG00000226869 (9.8)	ENSG00000226674 (6.4)	MLANA (6.2)	OCA2 (5.2)	KCNJ13 (4.5)	ENSG00000240405 (4.2)	ROPN1 (4.0)	CA14 (3.3)	RAB38 (3.0)	MITF (2.8)	TSPAN10 (2.8)	CRTAC1 (2.7)	C11orf31 (2.6)	ALK (2.5)	METTL16 (2.5)	TBC1D7 (2.5)	SLC6A15 (2.4)	ENSG00000220161 (2.4)	RGS12 (2.4)	SNX8 (2.3)	PRMT7 (2.3)	KIAA1310 (2.2)	TGFBRAP1 (2.1)	ARID1B (2.1)	PRTG (2.1)
A11.118.637.555.567.569.200.700	T Lymphocytes Regulatory	Cells	Blood Cells	0.45	>=0.20	ENSG00000256370 (8.9)	C9orf38 (6.2)	ICOS (6.0)	ZNF831 (5.9)	C14orf64 (5.9)	RPS2P45 (5.6)	PBX4 (5.5)	ENSG00000257242 (5.2)	ENSG00000257331 (5.1)	ENSG00000203739 (5.1)	CCDC66 (5.1)	ZBTB25 (4.9)	SETD1B (4.9)	PCSK7 (4.7)	FOXP1-AS1 (4.7)	ENSG00000251023 (4.7)	ENSG00000207034 (4.6)	TTC34 (4.4)	FNBP4 (4.4)	GMEB2 (4.3)	CDC14A (4.3)	HSF5 (4.2)	C4orf10 (4.2)	SFI1 (4.2)	SNRNP200 (4.0)
A07.541.510	Heart Valves	Cardiovascular System	Heart	0.48	>=0.20	CDH19 (7.0)	ENSG00000257960 (6.9)	ENSG00000226674 (5.4)	ENSG00000247809 (5.1)	ENSG00000236914 (4.5)	PDZRN4 (4.4)	CRTAC1 (4.0)	LAMA2 (3.9)	FRA10AC1 (3.9)	ABI3BP (3.9)	ADAMTSL3 (3.8)	ENSG00000200164 (3.8)	STK38L (3.8)	MAMDC2 (3.8)	RNF180 (3.6)	ZNF280D (3.5)	ENSG00000258824 (3.5)	ENSG00000226747 (3.5)	ITGA1 (3.4)	HMGCLL1 (3.3)	C1QTNF7 (3.3)	THBS3 (3.3)	N6AMT2 (3.3)	CWF19L2 (3.3)	CHST6 (3.2)
A06.407	Endocrine Glands	Endocrine System	Endocrine Glands	0.54	>=0.20	TMPRSS3 (2.6)	ENSG00000252071 (2.2)	MSLN (2.1)	STK36 (1.9)	C2orf15 (1.9)	KIAA0907 (1.8)	UPK3B (1.7)	BCL9 (1.6)	XPO1 (1.6)	ENSG00000215808 (1.6)	WBP2NL (1.6)	C8orf84 (1.6)	ZNF618 (1.6)	ENSG00000226747 (1.5)	BICD1 (1.5)	LINC00176 (1.5)	VTCN1 (1.5)	ENSG00000231160 (1.5)	ZNF785 (1.5)	IGSF9 (1.5)	STK31 (1.5)	KIAA1217 (1.5)	CHCHD3 (1.4)	CLNS1A (1.4)	VGLL4 (1.4)
A15.378.316.378.590.837.250	Erythroid Precursor Cells	Hemic and Immune Systems	Hematopoietic System	0.55	>=0.20	ENSG00000240280 (7.5)	ENSG00000229688 (7.1)	DSCR8 (7.1)	ENSG00000189229 (7.0)	AKR1E2 (6.5)	FAM178B (6.4)	ENSG00000251138 (6.4)	ENSG00000251565 (6.4)	KLF1 (6.3)	GABRG3 (5.7)	SERHL2 (5.5)	GFI1B (5.2)	LINC00355 (5.1)	ENSG00000257925 (5.1)	DUSP19 (4.9)	HDAC9 (4.8)	ATG10 (4.7)	CHML (4.7)	TMEM161B (4.7)	ENSG00000234753 (4.6)	ENSG00000247516 (4.6)	MIR17HG (4.6)	CSMD1 (4.6)	DGCR8 (4.6)	ENSG00000233236 (4.6)
A11.329.830	Stromal Cells	Cells	Connective Tissue Cells	0.64	>=0.20	NEXN-AS1 (6.9)	ENSG00000255496 (5.5)	ENSG00000248698 (5.3)	BDNF-AS1 (4.6)	ZPLD1 (4.5)	NF2 (4.1)	MIR2682 (3.9)	ENSG00000223403 (3.9)	HMGA2 (3.7)	HERC4 (3.5)	BDNF (3.3)	MARCH4 (3.3)	DRAP1 (3.2)	ALDH1L2 (3.2)	ZFHX4 (3.1)	PSG9 (3.0)	ADAM12 (3.0)	CREB3L1 (3.0)	ENSG00000250288 (3.0)	ENSG00000254300 (2.9)	PRSS12 (2.9)	B3GNT9 (2.8)	ENSG00000258220 (2.8)	PRR16 (2.7)	GALNT10 (2.7)
A05.360.319.114.373	Fallopian Tubes	Urogenital System	Genitalia	0.65	>=0.20	TMPRSS3 (4.6)	MSLN (4.3)	ENSG00000252071 (3.7)	C2orf15 (3.4)	ENSG00000215808 (3.4)	CHCHD3 (3.2)	LINC00176 (3.2)	UPK3B (3.1)	WBP2NL (3.1)	CDH6 (3.0)	IGSF9 (2.9)	KIAA0907 (2.7)	ENSG00000254602 (2.7)	BICD1 (2.7)	ZNF608 (2.7)	VTCN1 (2.6)	XPO1 (2.6)	ANKRD45 (2.5)	KIAA1217 (2.5)	PART1 (2.4)	DNAJB13 (2.4)	CLNS1A (2.4)	AVIL (2.4)	ENSG00000237978 (2.4)	MECOM (2.3)
A15.145.846	Serum	Hemic and Immune Systems	Blood	0.71	>=0.20	PCDHGB7 (4.4)	CASP12 (4.0)	SCAMP4 (3.6)	ENSG00000250075 (3.5)	TIE1 (3.1)	PTK7 (3.1)	LAMA4 (3.0)	MARCH4 (2.9)	ZNF804B (2.9)	HMGA2 (2.9)	NRG1 (2.9)	PCDHGA11 (2.9)	ENSG00000237013 (2.8)	BMPR2 (2.8)	ST6GALNAC3 (2.8)	SOX18 (2.8)	C12orf63 (2.8)	EDN1 (2.7)	NF2 (2.7)	MEX3B (2.7)	MMRN1 (2.7)	ENSG00000237870 (2.7)	EHD1 (2.6)	ENSG00000251210 (2.6)	ENSG00000255737 (2.6)
A11.497.497.600	Oocytes	Cells	Germ Cells	0.71	>=0.20	DLX6 (5.0)	DLX5 (4.7)	STX18 (4.4)	ENSG00000254968 (4.1)	TMED6 (3.8)	FOXR1 (3.7)	ENSG00000228739 (3.7)	CNBD1 (3.7)	HEXIM1 (3.5)	PDE6C (3.5)	ANAPC4 (3.5)	ARHGAP20 (3.3)	ENSG00000249618 (3.3)	ESR1 (3.3)	SDK1 (3.1)	DLX6-AS1 (3.1)	ENSG00000248008 (3.0)	ENSG00000204380 (3.0)	ALPL (3.0)	SLC3A1 (2.9)	ENSG00000228412 (2.8)	ENSG00000218896 (2.8)	BAG5 (2.8)	RANBP17 (2.8)	DUSP19 (2.7)
A06.407.312	Gonads	Endocrine System	Endocrine Glands	0.72	>=0.20	TMPRSS3 (3.2)	MSLN (2.7)	ENSG00000252071 (2.4)	C2orf15 (2.2)	KIAA0907 (2.2)	ENSG00000215808 (2.2)	STK36 (2.1)	WBP2NL (2.1)	XPO1 (2.1)	UPK3B (2.1)	C8orf84 (2.0)	VTCN1 (2.0)	BCL9 (2.0)	BICD1 (2.0)	IGSF9 (2.0)	LINC00176 (2.0)	MUC1 (1.8)	ANKRD45 (1.8)	ENSG00000237978 (1.8)	STK31 (1.8)	ENSG00000254602 (1.8)	CHCHD3 (1.8)	MMEL1 (1.8)	ZNF618 (1.8)	CLNS1A (1.8)
A11.872.040	Adult Stem Cells	Cells	Stem Cells	0.73	>=0.20	ENSG00000250337 (6.4)	LINC00458 (5.9)	FOXH1 (5.5)	COMMD7 (5.0)	LCTL (4.8)	ENSG00000250131 (4.7)	VASH2 (4.7)	ENSG00000249862 (4.5)	OTX2 (4.1)	TERF1 (4.1)	ENSG00000258636 (4.0)	ENSG00000256232 (3.9)	SYT6 (3.9)	ZNF589 (3.9)	GRID2 (3.8)	AASS (3.8)	C18orf54 (3.8)	CCRN4L (3.7)	SALL3 (3.6)	SNTG2 (3.5)	CHAF1A (3.5)	TET1 (3.5)	MBD2 (3.5)	GULP1 (3.4)	ZNF891 (3.4)
A11.329.228	Fibroblasts	Cells	Connective Tissue Cells	0.74	>=0.20	PSG9 (3.8)	NEXN-AS1 (3.6)	ENSG00000255496 (3.5)	TNFRSF11B (3.1)	LHX9 (3.0)	BDNF-AS1 (3.0)	PRR16 (2.9)	MARCH4 (2.8)	PRSS12 (2.7)	FGF7 (2.6)	ALDH1L2 (2.6)	SIM1 (2.5)	PTK7 (2.5)	BDNF (2.5)	SH3PXD2A (2.4)	HERC4 (2.4)	NF2 (2.4)	WNT16 (2.4)	ENSG00000255248 (2.4)	PRKG1 (2.4)	ENSG00000237187 (2.4)	FKBP7 (2.4)	CEP89 (2.3)	ARSJ (2.3)	MAB21L1 (2.3)
A07.231.114	Arteries	Cardiovascular System	Blood Vessels	0.75	>=0.20	ERG (3.4)	C8orf84 (3.1)	CASP12 (2.6)	MOV10L1 (2.6)	PRDM16 (2.5)	ITIH4 (2.5)	ZNF385D (2.5)	TIE1 (2.4)	ENSG00000171658 (2.4)	PCDH7 (2.4)	HRH1 (2.3)	KCTD10 (2.2)	LIMS2 (2.2)	LTBP2 (2.2)	STAB1 (2.2)	ENSG00000246777 (2.1)	ENSG00000248555 (2.1)	PCDHGB7 (2.1)	PITPNM2 (2.0)	FAM65A (2.0)	ECE1 (2.0)	ENSG00000231792 (2.0)	RUSC1-AS1 (2.0)	ATP6AP1L (2.0)	ACTN1 (1.9)
A15.382.490.315.583	Neutrophils	Hemic and Immune Systems	Immune System	0.76	>=0.20	CCR3 (8.2)	CMTM2 (7.4)	ENSG00000237781 (7.2)	ENSG00000241163 (6.8)	MSL1 (6.7)	HRH4 (6.6)	DPEP3 (6.5)	ENSG00000254470 (6.2)	KCNJ15 (6.2)	ENSG00000258944 (6.2)	MTMR3 (6.1)	VPS8 (5.9)	TIGD3 (5.9)	SOS2 (5.9)	KIAA0825 (5.8)	NUMB (5.8)	XPO6 (5.7)	TCP11L2 (5.6)	ATG2A (5.6)	MAP3K2 (5.6)	C3orf62 (5.6)	SCLT1 (5.6)	MARK2 (5.3)	NADK (5.3)	RARA (5.2)
A15.145.229.637.555.567.569.200	CD4 Positive T Lymphocytes	Hemic and Immune Systems	Blood	0.77	>=0.20	ENSG00000256370 (7.8)	ENSG00000257331 (6.7)	C9orf38 (6.2)	RPS2P45 (6.1)	C14orf64 (6.1)	ICOS (5.9)	PBX4 (5.8)	ZNF831 (5.7)	ENSG00000232084 (5.6)	TTC34 (5.5)	ENSG00000224074 (4.9)	ENSG00000251023 (4.9)	ZBTB25 (4.8)	ENSG00000203739 (4.8)	PCSK7 (4.7)	SETD1B (4.6)	ENSG00000257242 (4.6)	GMEB2 (4.5)	SFI1 (4.5)	CCDC66 (4.4)	ENSG00000232170 (4.4)	ENSG00000207034 (4.4)	LAT (4.3)	FOXP1-AS1 (4.3)	C4orf10 (4.3)
A05.360	Genitalia	Urogenital System	Genitalia	0.77	>=0.20	CREB3L4 (2.0)	C8orf84 (2.0)	PART1 (2.0)	STK36 (1.8)	BCL9 (1.7)	BMPR1B (1.7)	TMPRSS3 (1.6)	PCGEM1 (1.6)	KIAA0907 (1.6)	ENSG00000234715 (1.6)	C2orf15 (1.5)	ENSG00000252071 (1.5)	TIGD6 (1.5)	FSIP2 (1.5)	C15orf33 (1.5)	MPPED2 (1.5)	ZBTB10 (1.5)	TUG1 (1.4)	RFPL1 (1.4)	VTCN1 (1.4)	DNAL1 (1.3)	ENSG00000245750 (1.3)	ENSG00000231160 (1.3)	TRPS1 (1.3)	STX18 (1.3)
A11.118.637.415	Granulocytes	Cells	Blood Cells	0.78	>=0.20	CCR3 (7.5)	CMTM2 (6.8)	ENSG00000237781 (6.6)	HRH4 (6.4)	ENSG00000241163 (6.2)	MSL1 (6.1)	DPEP3 (6.0)	ENSG00000254470 (5.9)	KCNJ15 (5.6)	MTMR3 (5.6)	ENSG00000258944 (5.5)	SOS2 (5.5)	VPS8 (5.5)	TIGD3 (5.4)	KIAA0825 (5.4)	SCLT1 (5.3)	XPO6 (5.2)	NUMB (5.2)	C3orf62 (5.2)	MAP3K2 (5.1)	TCP11L2 (5.1)	ATG2A (5.1)	NADK (4.9)	MARK2 (4.9)	CAMP (4.8)
A15.382.490.555.567.537	Killer Cells Natural	Hemic and Immune Systems	Immune System	0.78	>=0.20	CTSW (6.1)	EOMES (5.3)	ZAP70 (4.0)	FAM179A (3.8)	PTPN22 (3.7)	PTPN4 (3.6)	RHEBL1 (3.6)	CST7 (3.5)	DOCK10 (3.5)	ZNF142 (3.4)	AKAP5 (3.3)	NLRC3 (3.2)	ENSG00000234323 (3.2)	ANKRD36 (3.1)	ENSG00000235519 (3.1)	GGNBP2 (3.1)	ENSG00000252071 (3.1)	SCML4 (3.1)	ENSG00000250288 (3.0)	ENSG00000251023 (3.0)	RASA2 (3.0)	ITPRIPL1 (3.0)	ZNF831 (3.0)	ENSG00000200164 (3.0)	PROX2 (3.0)
A11.872.580	Mesenchymal Stem Cells	Cells	Stem Cells	0.79	>=0.20	GPR1 (4.2)	PENK (3.9)	ENSG00000246430 (3.7)	ENSG00000248698 (3.7)	LEPR (3.7)	ALDH1L2 (3.6)	ENSG00000225399 (3.5)	MIR2682 (3.3)	ADAM12 (3.2)	KCNH1 (3.2)	RCN3 (3.1)	PRR16 (3.0)	ENSG00000254300 (3.0)	ARSJ (2.9)	TRIM32 (2.9)	C11orf87 (2.9)	PRDM16 (2.9)	WNT2B (2.8)	PDE1C (2.7)	CEP89 (2.7)	BDNF (2.7)	ENSG00000215808 (2.7)	ZFHX4 (2.7)	EXT1 (2.7)	FGF7 (2.6)
A05.360.490	Germ Cells	Urogenital System	Genitalia	0.79	>=0.20	DLX6 (4.6)	ENSG00000258220 (4.5)	DLX5 (4.1)	STX18 (4.1)	C4orf45 (4.1)	ENSG00000237675 (4.0)	CNBD1 (4.0)	ENSG00000249618 (3.8)	ENSG00000254968 (3.7)	TMED6 (3.4)	ENSG00000228739 (3.4)	ENSG00000228075 (3.4)	ENSG00000224792 (3.4)	C17orf74 (3.4)	PDE6C (3.3)	HEXIM1 (3.3)	IGSF11-AS1 (3.2)	ENSG00000258977 (3.1)	FOXR1 (3.1)	ENSG00000229243 (3.1)	ESR1 (3.1)	ARHGAP20 (3.0)	LINC00238 (3.0)	ENSG00000248008 (3.0)	ANAPC4 (3.0)
A05.360.319.114.630	Ovary	Urogenital System	Genitalia	0.81	>=0.20	TMPRSS3 (3.4)	MSLN (2.9)	ENSG00000252071 (2.5)	KIAA0907 (2.3)	ENSG00000215808 (2.2)	UPK3B (2.2)	C2orf15 (2.2)	WBP2NL (2.2)	LINC00176 (2.2)	VTCN1 (2.2)	XPO1 (2.1)	STK36 (2.1)	IGSF9 (2.1)	BICD1 (2.0)	C8orf84 (2.0)	MUC1 (2.0)	CHCHD3 (1.9)	BCL9 (1.9)	MMEL1 (1.9)	CLNS1A (1.8)	KIAA1217 (1.8)	ZNF618 (1.8)	ENSG00000237978 (1.8)	SLCO6A1 (1.8)	ENSG00000254602 (1.8)
A10.690.552	Muscle Striated	Tissues	Muscles	0.81	>=0.20	MYOT (7.5)	ATP2A1 (7.2)	IDI2 (7.2)	ENSG00000204460 (7.2)	ACTN3 (7.1)	CALML6 (7.1)	RAPSN (6.9)	ENSG00000229444 (6.9)	TNNC2 (6.9)	MYL1 (6.8)	ASB5 (6.5)	TMEM52 (6.5)	SCN4A (6.4)	CA3 (6.3)	CACNB1 (6.3)	DUSP13 (6.3)	SYPL2 (6.2)	TRIM54 (6.1)	NRAP (5.9)	PLCD4 (5.9)	MYH7B (5.9)	RNF123 (5.6)	PEBP4 (5.6)	XIRP2 (5.6)	CHRNB1 (5.5)
A05.360.319.114	Adnexa Uteri	Urogenital System	Genitalia	0.81	>=0.20	TMPRSS3 (3.4)	MSLN (2.9)	ENSG00000252071 (2.5)	KIAA0907 (2.3)	ENSG00000215808 (2.2)	UPK3B (2.2)	C2orf15 (2.2)	LINC00176 (2.2)	WBP2NL (2.2)	VTCN1 (2.2)	XPO1 (2.1)	STK36 (2.1)	IGSF9 (2.1)	BICD1 (2.1)	C8orf84 (2.0)	MUC1 (2.0)	CHCHD3 (1.9)	BCL9 (1.9)	MMEL1 (1.9)	KIAA1217 (1.8)	CLNS1A (1.8)	ZNF618 (1.8)	ENSG00000237978 (1.8)	SLCO6A1 (1.8)	CDH6 (1.8)
A02.633.567.850	Quadriceps Muscle	Musculoskeletal System	Muscles	0.82	>=0.20	ENSG00000204460 (7.7)	MYOT (7.6)	ACTN3 (7.4)	CALML6 (7.4)	ATP2A1 (7.3)	IDI2 (7.3)	ENSG00000229444 (7.2)	RAPSN (7.0)	TNNC2 (6.9)	MYL1 (6.9)	TMEM52 (6.7)	SCN4A (6.5)	ASB5 (6.5)	CACNB1 (6.5)	CA3 (6.4)	DUSP13 (6.3)	SYPL2 (6.3)	TRIM54 (6.2)	PLCD4 (6.0)	MYH7B (6.0)	NRAP (5.9)	RNF123 (5.8)	SLC29A2 (5.8)	PEBP4 (5.7)	XIRP2 (5.6)
A10.615.550.760	Respiratory Mucosa	Tissues	Membranes	0.83	>=0.20	DTHD1 (7.2)	ABCA13 (7.1)	WDR49 (7.0)	ZMYND10 (7.0)	DYDC1 (7.0)	FAM154B (6.9)	CCDC65 (6.7)	CCDC17 (6.6)	C6orf118 (6.5)	C1orf110 (6.5)	TTC29 (6.5)	WDR96 (6.5)	VWA3B (6.5)	DYDC2 (6.4)	ARMC3 (6.4)	DNAI1 (6.4)	AGBL2 (6.4)	DNAH5 (6.4)	LRGUK (6.3)	C12orf63 (6.2)	CCDC39 (6.1)	LRRC48 (6.0)	APOBEC4 (5.9)	C6orf165 (5.9)	SPATA4 (5.9)
A02.835.583	Joints	Musculoskeletal System	Skeleton	0.84	>=0.20	FGF10 (5.6)	FGF7 (4.9)	ENSG00000254300 (4.5)	VIT (4.1)	LRRN4CL (3.7)	DPP4 (3.5)	ZCCHC14 (3.5)	CTSK (3.3)	ABI3BP (3.1)	ANGPTL2 (3.1)	ENSG00000248079 (3.1)	SDK1 (3.0)	ENSG00000246430 (2.9)	CYP27C1 (2.7)	ANTXR2 (2.7)	MTSS1 (2.6)	C10orf26 (2.6)	PDE1A (2.5)	TBC1D5 (2.5)	GLI3 (2.5)	BNC2 (2.5)	CPA6 (2.5)	SVEP1 (2.5)	GNPDA2 (2.5)	DTWD1 (2.5)
A07.541	Heart	Cardiovascular System	Heart	0.84	>=0.20	ENSG00000236013 (7.2)	SLC8A1 (6.2)	TECRL (5.9)	C20orf26 (5.8)	MYL3 (5.4)	RBM20 (5.1)	ENSG00000250668 (5.1)	TMEM182 (4.8)	NRAP (4.7)	TNNC1 (4.7)	RYR2 (4.6)	PARK2 (4.6)	CDH19 (4.5)	TCAP (4.5)	MYOM1 (4.5)	PDE1C (4.5)	CKM (4.4)	XIRP2 (4.3)	C1orf105 (4.3)	FGF12 (4.3)	DAND5 (4.2)	FSD2 (4.2)	MYH7B (4.1)	ENSG00000253205 (4.1)	ENSG00000234323 (4.0)
A11.872.378	Hematopoietic Stem Cells	Cells	Stem Cells	0.84	>=0.20	COX8C (3.7)	ENSG00000227467 (3.1)	ENSG00000234753 (2.7)	GALK2 (2.6)	POU4F1 (2.6)	RAD51 (2.5)	CCDC66 (2.5)	TRAIP (2.5)	ENSG00000203446 (2.4)	EFTUD2 (2.4)	KLF1 (2.4)	CENPL (2.4)	MIR17HG (2.3)	CCDC18 (2.3)	C3orf78 (2.3)	ENSG00000247982 (2.3)	ATAD5 (2.3)	TAF5 (2.2)	TIPIN (2.2)	LYL1 (2.2)	ENSG00000189229 (2.2)	MAD1L1 (2.2)	TRMT1 (2.2)	PRPF40A (2.2)	SNHG3 (2.2)
A07.231.908.670	Portal System	Cardiovascular System	Blood Vessels	0.85	>=0.20	MOV10L1 (5.6)	MMRN1 (5.5)	CASP12 (5.2)	SOX18 (4.8)	TIE1 (4.8)	STAB1 (4.7)	ERG (4.6)	EDN1 (4.6)	NOS3 (4.4)	NRG1 (4.3)	HYAL2 (4.0)	CDH5 (4.0)	LAMA4 (3.9)	EXOC6 (3.9)	HYI (3.8)	PDGFB (3.8)	DHH (3.7)	RALA (3.6)	PROCR (3.5)	RARB (3.4)	GRAP (3.4)	DOCK4 (3.3)	ENSG00000189152 (3.3)	ECE1 (3.3)	PCDHGB7 (3.3)
A11.382	Endocrine Cells	Cells	Endocrine Cells	0.85	>=0.20	HSD17B1 (3.5)	WFDC3 (3.4)	LHCGR (3.3)	ENSG00000228739 (3.3)	NR5A2 (3.3)	ST3GAL4 (3.1)	SLC44A5 (3.0)	WFDC10B (2.9)	MTMR2 (2.7)	HINFP (2.6)	FSHR (2.5)	AMH (2.5)	AQP11 (2.4)	PLEK2 (2.3)	ENSG00000256885 (2.3)	GLDN (2.2)	FDX1 (2.2)	GSTA3 (2.2)	RNASEH2C (2.2)	INTS4 (2.1)	TSHZ2 (2.1)	PSME4 (2.1)	LINGO2 (2.1)	RAD51C (2.1)	BRE (2.1)
A11.627.340.360	Granulocyte Precursor Cells	Cells	Myeloid Cells	0.87	>=0.20	CAMP (5.0)	LYG2 (4.9)	ENSG00000228340 (4.8)	COL23A1 (4.7)	ENSG00000245622 (4.5)	RAD9B (4.4)	ENSG00000259107 (4.3)	C12orf59 (4.2)	MFSD10 (4.1)	CAMKMT (4.1)	HRH4 (4.0)	CCDC18 (4.0)	ELOVL3 (3.9)	XRCC6BP1 (3.8)	CST7 (3.7)	NAT6 (3.5)	RNASEH2C (3.5)	TESC (3.4)	RECQL4 (3.3)	ZNF280D (3.2)	MUS81 (3.2)	ATXN7L1 (3.2)	PTPN22 (3.2)	TRMT2A (3.2)	CASC5 (3.2)
A07.541.560	Heart Ventricles	Cardiovascular System	Heart	0.88	>=0.20	ENSG00000236013 (7.9)	SLC8A1 (7.0)	C20orf26 (6.9)	TECRL (6.3)	MYL3 (6.1)	ENSG00000250668 (5.7)	RBM20 (5.5)	NRAP (5.3)	PARK2 (5.2)	TMEM182 (5.2)	TNNC1 (5.2)	TCAP (5.0)	RYR2 (4.9)	PDE1C (4.9)	XIRP2 (4.8)	MYOM1 (4.7)	ENSG00000253205 (4.7)	CKM (4.7)	FGF12 (4.6)	ENSG00000234229 (4.5)	MYH7B (4.5)	C1orf105 (4.5)	ENSG00000234323 (4.5)	FSD2 (4.4)	ENSG00000235485 (4.4)
A07.231.908	Veins	Cardiovascular System	Blood Vessels	0.89	>=0.20	MOV10L1 (5.3)	MMRN1 (5.1)	CASP12 (4.8)	STAB1 (4.6)	TIE1 (4.6)	SOX18 (4.5)	ERG (4.4)	EDN1 (4.3)	NOS3 (4.1)	NRG1 (4.0)	HYAL2 (3.9)	CDH5 (3.8)	HYI (3.7)	LAMA4 (3.7)	PDGFB (3.6)	DHH (3.6)	EXOC6 (3.5)	PROCR (3.3)	RALA (3.2)	ECE1 (3.2)	RARB (3.2)	GRAP (3.2)	PCDHGB7 (3.1)	ENSG00000189152 (3.1)	DOCK4 (3.1)
A06.407.900	Thyroid Gland	Endocrine System	Endocrine Glands	0.9	>=0.20	RMST (7.1)	NPNT (4.9)	ENSG00000257501 (4.6)	DAPK2 (4.4)	TCERG1L (4.4)	ST6GAL2 (4.1)	ENSG00000226754 (4.0)	ENSG00000229891 (3.8)	SNX22 (3.7)	MBIP (3.5)	ATP13A4 (3.5)	ENSG00000228853 (3.1)	SMCR5 (3.1)	ENSG00000228393 (3.1)	TMEM50B (3.0)	COL23A1 (3.0)	ENSG00000248339 (3.0)	ENSG00000245773 (2.9)	PRDM16 (2.9)	C17orf57 (2.9)	PIWIL1 (2.9)	RUSC1-AS1 (2.9)	ENSG00000245849 (2.8)	ENSG00000227782 (2.8)	SLC20A2 (2.7)
A11.118.637.555.567.569	T Lymphocytes	Cells	Blood Cells	0.91	>=0.20	IL2 (6.1)	BCL11B (4.4)	ZAP70 (4.4)	FLT3LG (4.3)	ICOS (4.1)	PBX4 (4.0)	LAT (4.0)	C14orf64 (3.9)	TTC16 (3.7)	SCML4 (3.5)	ZNF831 (3.5)	C5orf39 (3.3)	SFI1 (3.3)	PCSK7 (3.3)	NOSIP (3.2)	CDC14A (3.1)	NLRC3 (3.1)	C12orf65 (3.1)	TNFRSF25 (3.1)	ENSG00000256370 (3.1)	CCDC66 (3.1)	ZBTB25 (3.0)	RBL2 (3.0)	RPS2P45 (3.0)	PHF15 (3.0)
A11.627.635	Myeloid Progenitor Cells	Cells	Myeloid Cells	0.92	>=0.20	COX8C (4.5)	ENSG00000227467 (3.6)	GALK2 (3.3)	ENSG00000234753 (3.3)	C3orf78 (3.0)	POU4F1 (2.9)	ENSG00000203446 (2.9)	RAD51 (2.8)	TRAIP (2.8)	KLF1 (2.7)	EFTUD2 (2.7)	CENPL (2.7)	FARSA (2.7)	UCHL5 (2.6)	CDC25A (2.5)	CAMKMT (2.5)	TBCE (2.5)	ENSG00000189229 (2.5)	ENSG00000245622 (2.5)	RHEBL1 (2.5)	CCDC18 (2.5)	TIPIN (2.4)	CST7 (2.4)	GART (2.4)	SNHG3 (2.4)
A11.436.275	Endothelial Cells	Cells	Epithelial Cells	0.92	>=0.20	MOV10L1 (4.7)	TIE1 (4.4)	MMRN1 (4.2)	SOX18 (4.1)	CASP12 (4.0)	GRAP (4.0)	STAB1 (3.9)	PDGFB (3.8)	ENSG00000189152 (3.7)	NOS3 (3.7)	ERG (3.7)	EDN1 (3.7)	HYAL2 (3.7)	SLC24A1 (3.5)	FOXR1 (3.4)	GBX2 (3.3)	CDH5 (3.2)	NF2 (3.0)	LAMA4 (2.9)	HYI (2.9)	PROCR (2.8)	ECE1 (2.7)	ARAP3 (2.7)	SEMA3F (2.7)	RALA (2.6)
A10.272	Epithelium	Tissues	Epithelium	0.92	>=0.20	ABCA13 (4.3)	DTHD1 (4.2)	WDR49 (4.2)	FAM154B (4.1)	ZMYND10 (4.1)	ARMC3 (4.1)	CCDC17 (4.0)	DYDC1 (4.0)	CCDC65 (4.0)	VWA3B (4.0)	C1orf110 (4.0)	AGBL2 (3.9)	DNAI1 (3.9)	LRGUK (3.9)	DYDC2 (3.9)	WDR96 (3.9)	DNAH5 (3.9)	TTC29 (3.8)	C6orf118 (3.7)	DYNLRB2 (3.7)	C12orf63 (3.7)	LRRC48 (3.7)	APOBEC4 (3.6)	SPATA4 (3.6)	TSGA10 (3.6)
A10.690	Muscles	Tissues	Muscles	0.93	>=0.20	ENSG00000204460 (5.2)	MYOT (5.2)	IDI2 (5.1)	ACTN3 (5.1)	ATP2A1 (5.1)	CALML6 (5.0)	TNNC2 (4.8)	ENSG00000229444 (4.8)	MYL1 (4.8)	RAPSN (4.8)	CACNB1 (4.6)	ASB5 (4.5)	SYPL2 (4.5)	DUSP13 (4.5)	TMEM52 (4.4)	CA3 (4.4)	SCN4A (4.4)	PLCD4 (4.2)	TRIM54 (4.2)	NRAP (4.1)	MYH7B (4.0)	RNF123 (4.0)	CHRNB1 (3.9)	MYPN (3.9)	PEBP4 (3.9)
A10.165.450.300.425	Keloid	Tissues	Connective Tissue	0.93	>=0.20	ENSG00000251160 (5.1)	KCNU1 (4.4)	ENSG00000228075 (4.3)	SH3PXD2A (4.3)	ENSG00000248118 (4.2)	ENSG00000229175 (4.2)	PRSS12 (4.1)	ENSG00000254300 (3.9)	ENSG00000255933 (3.8)	HORMAD2 (3.8)	WFDC11 (3.7)	ALDH1L2 (3.7)	ENSG00000246430 (3.7)	OR5L2 (3.7)	ENSG00000255496 (3.7)	PRR16 (3.7)	ENSG00000227016 (3.6)	CD248 (3.5)	PSG9 (3.5)	STK32B (3.5)	ABI3BP (3.5)	KIAA1715 (3.5)	ENSG00000240710 (3.4)	TNFRSF11B (3.4)	MAB21L1 (3.4)
A07.231	Blood Vessels	Cardiovascular System	Blood Vessels	0.95	>=0.20	ERG (3.8)	MOV10L1 (3.6)	MIR2682 (3.5)	CASP12 (3.4)	EDN1 (3.4)	STAB1 (3.4)	MMRN1 (3.3)	TIE1 (3.3)	SOX18 (3.2)	HYAL2 (3.1)	ECE1 (3.0)	NOS3 (3.0)	HYI (2.9)	LAMA4 (2.8)	FAM189B (2.8)	PROCR (2.8)	CDH5 (2.8)	NF2 (2.7)	SLC12A4 (2.7)	PDGFB (2.6)	RALA (2.6)	SEMA3F (2.6)	GRAP (2.6)	NRG1 (2.5)	DHH (2.5)
A11.627.624.249	Monocyte Macrophage Precursor Cells	Cells	Myeloid Cells	0.96	>=0.20	COX8C (9.3)	ENSG00000227467 (8.2)	ENSG00000203446 (6.5)	MYO7A (5.3)	ATP6V0D2 (5.3)	HS3ST2 (4.9)	C3orf78 (4.6)	TSNARE1 (4.5)	AP4E1 (4.5)	GALK2 (4.3)	CACNA2D4 (4.2)	C15orf57 (3.9)	ENSG00000245622 (3.9)	ENSG00000247982 (3.9)	ENSG00000234753 (3.8)	CST7 (3.8)	TRPM7 (3.8)	MAD1L1 (3.8)	POU4F1 (3.6)	RPP25 (3.6)	RHEBL1 (3.5)	ENSG00000228389 (3.4)	SRF (3.3)	GUCY1A2 (3.2)	NPC1 (3.2)
A05.360.319	Genitalia Female	Urogenital System	Genitalia	0.96	>=0.20	TMPRSS3 (2.4)	ESR1 (2.2)	STK36 (2.0)	VTCN1 (2.0)	STX18 (1.9)	C8orf84 (1.9)	MSLN (1.8)	ENSG00000252071 (1.8)	KIAA0907 (1.8)	BCL9 (1.7)	ENSG00000215808 (1.7)	MUC1 (1.7)	XPO1 (1.6)	TUG1 (1.6)	SEPT2 (1.6)	DLX5 (1.6)	IRF2BP2 (1.6)	ZNF618 (1.6)	CREB3L4 (1.6)	IGSF9 (1.5)	TRPS1 (1.5)	VGLL4 (1.5)	MECOM (1.5)	MPPED2 (1.5)	TLE1 (1.5)
A11.872.378.590.635	Granulocyte Macrophage Progenitor Cells	Cells	Stem Cells	0.96	>=0.20	COX8C (6.8)	ENSG00000227467 (5.6)	ENSG00000203446 (4.4)	ENSG00000245622 (4.0)	CST7 (3.8)	CACNA2D4 (3.8)	MYO7A (3.7)	ATP6V0D2 (3.5)	GALK2 (3.5)	C3orf78 (3.4)	ENSG00000247982 (3.3)	TSNARE1 (3.3)	MFSD10 (3.2)	ENSG00000228340 (3.2)	AP4E1 (3.2)	HS3ST2 (3.0)	EFTUD2 (3.0)	MAD1L1 (2.9)	ENSG00000259107 (2.9)	ENSG00000234753 (2.9)	POU4F1 (2.9)	SLC26A6 (2.8)	TRPM7 (2.8)	FARSA (2.8)	C15orf57 (2.7)
A11.329.629	Osteoblasts	Cells	Connective Tissue Cells	0.97	>=0.20	GPR1 (5.7)	SFTA1P (4.6)	ENSG00000246430 (4.4)	CDH13 (4.3)	ANKIB1 (4.2)	LEPR (4.0)	ALDH1L2 (3.9)	KCTD10 (3.8)	SIX2 (3.7)	IPP (3.6)	THBS3 (3.6)	ENSG00000248698 (3.6)	TNFRSF11B (3.6)	LRRC27 (3.5)	ACVR2A (3.4)	PDE1C (3.3)	STK32B (3.3)	ENSG00000230393 (3.3)	TMEM17 (3.3)	GLS (3.2)	ENSG00000227811 (3.2)	ADAM12 (3.1)	C8orf34 (3.1)	ENSG00000225399 (3.1)	TMCO7 (3.1)
A05.810.453	Kidney	Urogenital System	Urinary Tract	0.97	>=0.20	SLC7A13 (9.4)	NAT8 (8.3)	CDH16 (8.0)	SLC3A1 (7.2)	SLC5A10 (7.1)	PKHD1 (7.0)	SLC22A6 (6.7)	ENSG00000258586 (6.2)	DPYS (6.1)	SLC22A8 (5.6)	LYG1 (5.4)	SLC7A9 (5.1)	PAH (4.6)	PTH1R (4.2)	ENSG00000259134 (4.1)	ENSG00000245750 (4.0)	ENSG00000259359 (3.8)	PBLD (3.7)	SLC22A24 (3.7)	SLC2A2 (3.6)	C2orf67 (3.6)	HPD (3.5)	SLC2A9 (3.5)	C12orf59 (3.5)	ACADL (3.3)
A05.360.319.679.490	Endometrium	Urogenital System	Genitalia	0.97	>=0.20	STX18 (5.4)	DLX6 (4.8)	DLX5 (4.5)	ESR1 (4.4)	ANAPC4 (4.4)	ZNF516 (3.6)	DLX6-AS1 (3.2)	SALL1 (2.7)	ENSG00000247809 (2.6)	VTCN1 (2.5)	TLE1 (2.5)	LAMC3 (2.5)	DNAJB13 (2.5)	RANBP17 (2.4)	STK36 (2.3)	GLIS3 (2.3)	APCDD1 (2.1)	SLC26A2 (2.1)	ARMC3 (2.1)	MPPED2 (2.1)	CREB3L4 (2.0)	FREM1 (2.0)	STXBP6 (2.0)	PAPLN (2.0)	CITED4 (2.0)
A10.165.450	Granulation Tissue	Tissues	Connective Tissue	0.97	>=0.20	ENSG00000251160 (5.2)	PSG9 (4.2)	ENSG00000228075 (4.2)	ENSG00000248118 (4.1)	KCNU1 (4.1)	SH3PXD2A (3.8)	ENSG00000231453 (3.8)	ENSG00000255933 (3.7)	ENSG00000255496 (3.7)	ENSG00000227016 (3.7)	ALDH1L2 (3.7)	ENSG00000239275 (3.6)	ENSG00000229175 (3.6)	PRR16 (3.6)	C7orf45 (3.6)	PRSS12 (3.5)	CD248 (3.5)	MAB21L1 (3.5)	OR5L2 (3.4)	HORMAD2 (3.4)	MARCH4 (3.4)	ENSG00000175604 (3.3)	PDGFRA (3.3)	ENSG00000225269 (3.3)	RCN3 (3.3)
A10.272.497	Epidermis	Tissues	Epithelium	0.97	>=0.20	MLANA (9.8)	ALOXE3 (9.8)	WNT16 (9.1)	KCNK7 (9.0)	CST6 (8.6)	ENSG00000179859 (8.5)	WFDC5 (8.4)	ASPRV1 (8.3)	ENSG00000237101 (8.0)	ENSG00000246100 (7.6)	ATP6V1C2 (7.0)	C15orf62 (7.0)	SLURP1 (6.5)	ANXA9 (6.4)	ATG9B (6.4)	ELOVL3 (5.8)	BNIPL (5.7)	COL7A1 (5.5)	BLMH (5.4)	DSC3 (5.3)	CENPT (5.3)	ENSG00000251603 (5.2)	CITED4 (5.1)	ARL9 (5.0)	ENSG00000157837 (4.9)
A15.145.229.334	Erythrocytes	Hemic and Immune Systems	Blood	0.98	>=0.20	GFI1B (5.3)	ENSG00000229688 (5.1)	ENSG00000240280 (5.0)	ENSG00000189229 (4.9)	ENSG00000251138 (4.7)	AKR1E2 (4.7)	TUBB1 (4.6)	KLF1 (4.5)	ZNF778 (4.3)	FAM178B (4.3)	DSCR8 (4.2)	ARL15 (4.1)	TXNL4B (4.1)	ENSG00000251565 (4.0)	ITGA2B (4.0)	ATP5E (4.0)	FAM65C (4.0)	DUSP19 (3.9)	LINC00355 (3.9)	PRUNE (3.9)	ENSG00000226759 (3.8)	ENSG00000257612 (3.7)	ATG10 (3.7)	C17orf57 (3.7)	ENSG00000257925 (3.6)
A11.329.171	Chondrocytes	Cells	Connective Tissue Cells	0.98	>=0.20	CILP2 (6.0)	ENSG00000229127 (5.6)	RAB9BP1 (4.7)	ENSG00000224788 (4.4)	PENK (4.0)	COX6CP2 (4.0)	ENSG00000246430 (4.0)	COL2A1 (3.8)	ABI3BP (3.6)	SLC9A11 (3.4)	SCRG1 (3.3)	ENSG00000229243 (3.3)	ENSG00000235054 (3.3)	GPC6 (3.3)	RANBP3L (3.3)	THBS3 (3.2)	CYP27C1 (3.2)	KLHL29 (3.1)	MED27 (3.1)	SIX2 (3.1)	ALDH1L2 (3.1)	CHRM4 (3.1)	PRR16 (3.1)	LINC00334 (2.9)	SOX14 (2.9)
A11.443	Erythroid Cells	Cells	Erythroid Cells	0.98	>=0.20	GFI1B (5.3)	ENSG00000229688 (5.0)	ENSG00000240280 (4.9)	ENSG00000189229 (4.8)	AKR1E2 (4.7)	ENSG00000251138 (4.6)	KLF1 (4.6)	TUBB1 (4.5)	ZNF778 (4.3)	FAM178B (4.2)	DSCR8 (4.1)	TXNL4B (4.1)	ARL15 (4.0)	ITGA2B (4.0)	ATP5E (4.0)	FAM65C (4.0)	ENSG00000251565 (3.9)	LINC00355 (3.9)	DUSP19 (3.9)	PRUNE (3.8)	ENSG00000226759 (3.8)	ATG10 (3.7)	ENSG00000257612 (3.7)	NBAS (3.6)	C17orf57 (3.6)
A05.810.453.324	Kidney Cortex	Urogenital System	Urinary Tract	0.98	>=0.20	ENSG00000258586 (10.4)	ENSG00000215808 (7.1)	BDNF-AS1 (6.7)	CDH13 (6.1)	SLC22A8 (5.6)	CCDC147 (5.4)	SHISA9 (4.7)	SLC22A6 (4.5)	GBX2 (4.4)	SLC5A10 (4.4)	TM7SF3 (4.3)	C7orf10 (4.2)	TMEM192 (4.1)	ENSG00000254300 (4.0)	WWC1 (3.9)	STK32B (3.8)	PDE4C (3.7)	DGKI (3.7)	SOX5P (3.7)	ENSG00000220161 (3.6)	TGFBRAP1 (3.6)	CDH16 (3.5)	ENSG00000235054 (3.4)	LCTL (3.4)	ENSG00000224074 (3.3)
A02.835.583.443.800.800	Synovial Fluid	Musculoskeletal System	Skeleton	0.99	>=0.20	CTSW (5.8)	ZNF831 (5.1)	FLT3LG (5.1)	C3orf71 (4.6)	ZAP70 (4.5)	ATXN7L1 (4.4)	GHRLOS2 (4.3)	ENSG00000243150 (4.2)	OLR1 (4.2)	PBX4 (4.2)	ICOS (4.1)	TTC16 (4.0)	ZBTB25 (3.9)	U2AF1L4 (3.7)	MAP3K14 (3.7)	ENSG00000257242 (3.7)	ENTHD1 (3.7)	PSTPIP1 (3.6)	CST7 (3.6)	LAT (3.6)	BCL11B (3.6)	EOMES (3.6)	CDC42SE1 (3.5)	TNFRSF25 (3.5)	CCR2 (3.5)
A03.734.414	Islets of Langerhans	Digestive System	Pancreas	0.99	>=0.20	ZPLD1 (4.7)	PCDH7 (3.4)	NF1 (3.4)	SMURF1 (3.3)	SLC44A5 (3.0)	UPK3B (3.0)	UTP23 (2.7)	KRT18P38 (2.6)	INTS4 (2.6)	METTL12 (2.5)	ENSG00000234264 (2.5)	SFTA1P (2.5)	PPA2 (2.3)	TUBGCP4 (2.3)	KIAA1524 (2.2)	CCDC99 (2.2)	C2orf49 (2.2)	BCAR3 (2.2)	ENSG00000255100 (2.1)	MET (2.1)	C5orf34 (2.1)	BRIP1 (2.1)	ORC4 (2.1)	FAM84B (2.1)	CDCP1 (2.0)
A15.382.490.555.567.622	Lymphocytes Null	Hemic and Immune Systems	Immune System	0.99	>=0.20	ZBTB32 (7.4)	WDR65 (6.8)	SYCE2 (5.9)	ENSG00000235665 (5.5)	RHEBL1 (5.3)	MLK7-AS1 (5.0)	ITPRIPL1 (4.5)	ENSG00000235519 (4.4)	ENSG00000250337 (4.4)	ENSG00000250156 (4.3)	ENSG00000223960 (4.2)	ENSG00000225539 (4.1)	CISH (4.1)	ENSG00000227579 (4.0)	ENSG00000224738 (4.0)	STAG3 (3.9)	RAD9B (3.9)	EOMES (3.9)	DBF4B (3.9)	ZAP70 (3.8)	ENSG00000240423 (3.8)	ENSG00000250341 (3.8)	IL21 (3.8)	ICOS (3.8)	CTSW (3.8)
A05.810	Urinary Tract	Urogenital System	Urinary Tract	0.99	>=0.20	SLC7A13 (8.6)	NAT8 (7.6)	CDH16 (7.3)	SLC3A1 (6.6)	SLC5A10 (6.4)	PKHD1 (6.4)	SLC22A6 (6.1)	ENSG00000258586 (5.6)	DPYS (5.6)	SLC22A8 (5.1)	LYG1 (4.9)	SLC7A9 (4.6)	PAH (4.2)	ENSG00000259134 (3.8)	PTH1R (3.8)	ENSG00000245750 (3.7)	ENSG00000259359 (3.5)	SLC22A24 (3.3)	PBLD (3.3)	SLC2A9 (3.3)	SLC2A2 (3.2)	HPD (3.2)	C12orf59 (3.1)	C2orf67 (3.1)	ACADL (3.0)
A04.411	Lung	Respiratory System	Lung	0.99	>=0.20	HORMAD1 (4.3)	SFTA1P (3.1)	LRRC36 (2.8)	ENSG00000250427 (2.1)	C17orf104 (2.0)	TRPC6 (1.9)	ENSG00000224738 (1.9)	MBIP (1.8)	ITGB6 (1.7)	IRX2 (1.6)	SLC34A2 (1.6)	PAQR5 (1.5)	ARHGEF26 (1.4)	NPNT (1.3)	IFT57 (1.3)	STK31 (1.2)	HAS3 (1.2)	PLAU (1.2)	SLC44A5 (1.1)	GALNTL4 (1.1)	CHCHD3 (1.1)	TFG (1.1)	ENSG00000252071 (1.1)	APOA1BP (1.1)	ENSG00000257218 (1.1)
A05.360.444.492.362	Foreskin	Urogenital System	Genitalia	0.99	>=0.20	SIM1 (4.0)	PARD6G (3.5)	UPK1A (3.5)	ENSG00000248698 (3.5)	ENSG00000249326 (3.4)	ENSG00000254602 (3.2)	ENSG00000224074 (3.0)	PSG9 (2.9)	ALOXE3 (2.9)	ENSG00000237101 (2.9)	GCNT4 (2.9)	BDNF-AS1 (2.8)	ELOVL3 (2.8)	ENSG00000179859 (2.8)	ANXA9 (2.7)	SIKE1 (2.7)	MYO1H (2.7)	ASPRV1 (2.6)	ENSG00000250075 (2.6)	WFDC5 (2.5)	PRSS12 (2.4)	CENPT (2.4)	ATP6V1C2 (2.4)	KIAA0146 (2.3)	ARID5B (2.2)
A05.360.319.679	Uterus	Urogenital System	Genitalia	0.99	>=0.20	STX18 (3.7)	ESR1 (3.4)	DLX5 (3.3)	DLX6 (3.3)	ANAPC4 (3.0)	ZNF516 (2.8)	DLX6-AS1 (2.3)	SALL1 (2.2)	TLE1 (2.0)	STK36 (2.0)	ENSG00000247809 (2.0)	VTCN1 (1.9)	LAMC3 (1.8)	FREM1 (1.8)	APCDD1 (1.8)	C8orf84 (1.7)	ENSG00000228853 (1.7)	MPPED2 (1.7)	GLIS3 (1.7)	BCL9 (1.6)	TUG1 (1.6)	CREB3L4 (1.6)	SEPT2 (1.6)	DNAJB13 (1.6)	TRPS1 (1.6)
A15.378	Hematopoietic System	Hemic and Immune Systems	Hematopoietic System	0.99	>=0.20	PILRA (3.3)	SPI1 (3.3)	HK3 (3.0)	SH3BP2 (3.0)	CCR3 (3.0)	NFAM1 (2.9)	NINJ1 (2.9)	APOBR (2.9)	PTAFR (2.9)	IL6R (2.8)	HRH4 (2.8)	ENSG00000258944 (2.8)	MAP3K2 (2.8)	SLC6A6 (2.8)	PTPRJ (2.8)	ENSG00000254470 (2.7)	GMIP (2.7)	PFKFB4 (2.7)	NUMB (2.7)	ARAP1 (2.7)	CBL (2.7)	RARA (2.7)	AKIRIN2 (2.6)	NADK (2.6)	RNF130 (2.6)
A04.623.603	Oropharynx	Respiratory System	Pharynx	0.99	>=0.20	RGS13 (6.2)	HTR3A (5.7)	CD19 (4.8)	ENSG00000259116 (4.2)	ZPBP2 (4.2)	IKZF3 (4.1)	TRAF5 (3.9)	CD79B (3.9)	IL21R (3.9)	STAG3 (3.8)	FAM53B (3.7)	GCNT4 (3.6)	HSF5 (3.6)	SYNRG (3.6)	BANK1 (3.5)	PTPRCAP (3.5)	DUS2L (3.5)	SNX22 (3.4)	DNAJB7 (3.4)	ENSG00000233848 (3.3)	ENSG00000224406 (3.3)	IL21 (3.3)	ESR2 (3.3)	ZNF831 (3.2)	ENSG00000189152 (3.2)
A05.360.444.492	Penis	Urogenital System	Genitalia	0.99	>=0.20	SIM1 (3.8)	UPK1A (3.6)	PARD6G (3.4)	ENSG00000248698 (3.3)	ENSG00000249326 (3.2)	ENSG00000254602 (3.1)	ENSG00000224074 (2.9)	ALOXE3 (2.8)	PSG9 (2.8)	GCNT4 (2.8)	ENSG00000237101 (2.7)	BDNF-AS1 (2.7)	MYO1H (2.7)	ENSG00000179859 (2.7)	ELOVL3 (2.6)	ANXA9 (2.6)	ASPRV1 (2.6)	SIKE1 (2.5)	ENSG00000250075 (2.4)	WFDC5 (2.4)	PRSS12 (2.3)	CENPT (2.3)	ATP6V1C2 (2.2)	ARID5B (2.2)	BLMH (2.2)
A10.615.550.599	Mouth Mucosa	Tissues	Membranes	0.99	>=0.20	LHX8 (6.6)	SLURP1 (6.3)	BNIPL (6.3)	CYP2C18 (5.5)	BTBD11 (5.4)	SLC13A4 (5.1)	TMEM79 (5.1)	CST6 (5.1)	CDH16 (4.9)	CLIC3 (4.8)	ALDH3B2 (4.6)	EMP1 (4.5)	RHOD (4.4)	UPK3B (4.3)	GJB5 (4.2)	ECM1 (4.2)	MYL1 (4.2)	ATP13A4 (4.1)	DSC3 (4.0)	CES2 (4.0)	OVOL1 (4.0)	GSDMC (3.9)	CDA (3.9)	ZDHHC21 (3.8)	ARL9 (3.8)
A11.066	Antigen Presenting Cells	Cells	Antigen-Presenting Cells	0.99	>=0.20	CYP27B1 (3.6)	C17orf96 (3.6)	TFEC (3.5)	CD40 (3.4)	SLC41A2 (3.4)	CD83 (3.4)	CISH (3.4)	AKAP5 (3.3)	ENTHD1 (3.3)	P2RY6 (3.2)	NAGA (3.2)	SNX8 (3.2)	SLC2A6 (3.1)	MAP3K14 (3.1)	DENND1B (3.0)	ENSG00000258583 (2.8)	ITPRIPL1 (2.8)	ZCCHC2 (2.8)	ZBTB46 (2.8)	RIPK2 (2.7)	KYNU (2.7)	ARRDC4 (2.6)	FMNL3 (2.6)	HK3 (2.6)	ADAMTSL4 (2.6)
A15.382.812.260	Dendritic Cells	Hemic and Immune Systems	Immune System	0.99	>=0.20	CYP27B1 (3.6)	C17orf96 (3.6)	TFEC (3.5)	CD40 (3.4)	SLC41A2 (3.4)	CD83 (3.4)	CISH (3.4)	AKAP5 (3.3)	ENTHD1 (3.3)	P2RY6 (3.2)	NAGA (3.2)	SNX8 (3.2)	SLC2A6 (3.1)	MAP3K14 (3.1)	DENND1B (3.0)	ENSG00000258583 (2.8)	ITPRIPL1 (2.8)	ZCCHC2 (2.8)	ZBTB46 (2.8)	RIPK2 (2.7)	KYNU (2.7)	ARRDC4 (2.6)	FMNL3 (2.6)	HK3 (2.6)	ADAMTSL4 (2.6)
A11.436.348	Hepatocytes	Cells	Epithelial Cells	0.99	>=0.20	ENSG00000256162 (10.1)	SERPINC1 (9.0)	APOB (9.0)	HPD (8.8)	F2 (8.6)	ITIH3 (8.1)	HGFAC (7.6)	PAH (7.4)	ENSG00000199488 (7.4)	SLC2A2 (7.0)	PLA2G12B (7.0)	LINC00176 (6.7)	CPN1 (6.7)	PROC (6.5)	MOGAT3 (6.5)	MAT1A (6.2)	NPC1L1 (5.8)	HP (5.4)	GCKR (5.3)	ITIH1 (5.2)	HABP2 (5.0)	ITIH4 (4.6)	CYP2C9 (4.6)	HNF1A (4.6)	ONECUT1 (4.6)
A11.382.625	Enteroendocrine Cells	Cells	Endocrine Cells	0.99	>=0.20	SLC44A5 (4.7)	UPK3B (4.6)	NF1 (4.3)	SMURF1 (4.1)	PCDH7 (4.1)	INTS4 (3.8)	ENSG00000234264 (3.6)	STK31 (3.2)	METTL12 (3.2)	UTP23 (3.2)	ENSG00000255100 (3.1)	KIAA1524 (3.0)	MET (3.0)	PDE4D (2.9)	GJB5 (2.9)	KIF20B (2.9)	NHP2L1 (2.8)	PPA2 (2.8)	TUBGCP4 (2.8)	CHORDC1 (2.8)	ADORA2B (2.8)	FAM84B (2.8)	BRCA2 (2.8)	NEK2 (2.7)	C5orf34 (2.7)
A15.145	Blood	Hemic and Immune Systems	Blood	1	>=0.20	TUBB1 (2.5)	LIMD2 (2.5)	CTSW (2.4)	SCML4 (2.3)	CMTM2 (2.3)	DPEP2 (2.3)	TLE4 (2.3)	ZAP70 (2.3)	ENSG00000213600 (2.2)	MAP3K3 (2.1)	CCR2 (2.1)	ZNF276 (2.1)	FMNL1 (2.1)	CAMP (2.1)	NFE2 (2.1)	FLT3LG (2.1)	CHD2 (2.1)	SPI1 (2.1)	SIPA1 (2.1)	TBC1D10C (2.1)	NFAM1 (2.0)	ITGA2B (2.0)	GRK6 (2.0)	USP4 (2.0)	ENSG00000241163 (2.0)
A15.145.229.188	Blood Platelets	Hemic and Immune Systems	Blood	1	>=0.20	ENSG00000227165 (11.3)	ENSG00000227811 (10.4)	TUBB1 (9.5)	ENSG00000258122 (9.3)	ENSG00000229941 (9.1)	ITGA2B (8.9)	C17orf57 (8.6)	MFAP3L (8.2)	CDKL1 (8.2)	RNF11 (8.1)	ENSG00000248309 (7.9)	ZNF778 (7.4)	ATP5E (7.4)	PELI2 (7.3)	ENSG00000220161 (7.2)	NEXN-AS1 (7.1)	TXNL4B (7.1)	ENSG00000226759 (6.9)	C14orf45 (6.7)	IGSF11-AS1 (6.6)	ENSG00000227994 (6.6)	BEND7 (6.4)	HEXIM2 (6.3)	MPL (6.3)	SLX4 (6.3)
A17.815	Skin	Integumentary System	Skin	1	>=0.20	WNT16 (6.1)	ENSG00000237101 (5.7)	WFDC5 (5.4)	ASPRV1 (5.3)	MLANA (5.0)	SLURP1 (4.5)	PARD6G (4.3)	KCNK7 (4.2)	ELOVL3 (4.1)	ENSG00000179859 (4.0)	ALDH3B2 (3.9)	DSC3 (3.8)	BNIPL (3.8)	WNT3 (3.8)	ENSG00000231453 (3.7)	CST6 (3.6)	ATP6V1C2 (3.6)	ALOXE3 (3.6)	RORA (3.4)	DEGS1 (3.2)	LYG2 (3.2)	TMEM79 (3.1)	ENSG00000246100 (2.9)	ROPN1 (2.9)	ENSG00000157837 (2.8)
A15.382.680	Phagocytes	Hemic and Immune Systems	Immune System	1	>=0.20	PILRA (3.7)	HK3 (3.3)	SPI1 (3.3)	PTPRJ (3.2)	PTAFR (3.1)	APOBR (3.0)	ARAP1 (3.0)	SH3BP2 (3.0)	OLR1 (2.9)	SLC6A6 (2.9)	TMEM127 (2.9)	NFAM1 (2.9)	ATG7 (2.8)	GMIP (2.8)	NINJ1 (2.8)	NUMB (2.8)	RNF130 (2.8)	TTLL4 (2.7)	CBL (2.7)	ENSG00000258944 (2.7)	TFEC (2.7)	IL6R (2.7)	MAP3K2 (2.7)	OSBPL11 (2.7)	CIR1 (2.6)
A15.145.229	Blood Cells	Hemic and Immune Systems	Blood	1	>=0.20	CCR2 (2.3)	TUBB1 (2.3)	LIMD2 (2.3)	FLT3LG (2.1)	SCML4 (2.0)	DPEP2 (2.0)	CTSW (2.0)	GRK6 (2.0)	FMNL1 (2.0)	ANKRD44 (2.0)	STK4 (2.0)	ITGA2B (1.9)	U2AF1L4 (1.9)	HK3 (1.9)	PSTPIP1 (1.9)	DOCK2 (1.9)	TBC1D10C (1.9)	ZNF276 (1.8)	GMIP (1.8)	ZAP70 (1.8)	SPI1 (1.8)	IGFLR1 (1.8)	ENSG00000241163 (1.8)	ITGA4 (1.8)	CHD2 (1.8)
A10.690.467	Muscle Smooth	Tissues	Muscles	1	>=0.20	MIR2682 (4.3)	ENSG00000248698 (4.2)	LY6K (4.0)	CDH6 (3.8)	LMOD1 (3.1)	SLC39A13 (2.8)	C11orf24 (2.8)	SLC12A4 (2.6)	COL6A1 (2.6)	C7orf10 (2.5)	ENSG00000255737 (2.5)	TRPC6 (2.4)	ARSJ (2.4)	GJC1 (2.4)	CD248 (2.4)	TAGLN (2.4)	TMCO7 (2.4)	PRR16 (2.4)	PTRF (2.3)	MTA2 (2.3)	DNAJB4 (2.3)	B4GALT2 (2.3)	CREB3L1 (2.2)	HMGA2 (2.2)	LIMS2 (2.2)
A11.872.190.260	Embryoid Bodies	Cells	Stem Cells	1	>=0.20	LINC00348 (6.8)	SFTA1P (6.2)	ENSG00000256232 (4.4)	WFIKKN1 (4.2)	WNT8A (4.0)	ENSG00000215447 (3.9)	PRTG (3.8)	ENSG00000259129 (3.4)	ENSG00000220161 (3.3)	ENSG00000254968 (3.3)	ENSG00000254602 (3.2)	DALRD3 (3.2)	SLC12A4 (3.2)	CLIC1P1 (3.1)	PDE10A (3.0)	ENSG00000228592 (3.0)	PFKFB4 (3.0)	ENSG00000247324 (3.0)	WNT2B (2.9)	ENSG00000228560 (2.9)	ENSG00000225539 (2.9)	NT5DC2 (2.9)	ENSG00000231304 (2.8)	ENSG00000237054 (2.8)	ENSG00000250682 (2.7)
A11.627	Myeloid Cells	Cells	Myeloid Cells	1	>=0.20	PILRA (3.4)	HK3 (3.2)	SPI1 (3.1)	PTPRJ (3.0)	APOBR (2.9)	PTAFR (2.9)	ARAP1 (2.8)	SH3BP2 (2.8)	OLR1 (2.7)	SLC6A6 (2.7)	ATG7 (2.7)	NFAM1 (2.7)	GMIP (2.7)	NUMB (2.6)	TMEM127 (2.6)	TTLL4 (2.6)	CBL (2.6)	NINJ1 (2.6)	RNF130 (2.6)	TFEC (2.6)	ENSG00000258944 (2.5)	IL6R (2.5)	CIR1 (2.5)	MAP3K2 (2.5)	HRH4 (2.5)
A15.382.490.555.567	Lymphocytes	Hemic and Immune Systems	Immune System	1	>=0.20	WDR64 (2.5)	TNFRSF17 (2.4)	ZBTB32 (2.4)	IL2 (2.4)	ENSG00000245025 (2.4)	FLT3LG (2.3)	MEI1 (2.2)	IKZF3 (2.2)	C5orf39 (2.2)	ZPBP2 (2.2)	CCR2 (2.2)	SLC25A45 (2.2)	PTPRCAP (2.2)	GLCCI1 (2.1)	RLTPR (2.1)	TXNDC11 (2.1)	NUP210 (2.1)	ZNF775 (2.1)	CD79B (2.1)	C12orf65 (2.1)	WDR74 (2.1)	MC4R (2.1)	FKBP11 (2.1)	ACSF3 (2.0)	HEMK1 (2.0)
A09.371.337	Eyelids	Sense Organs	Eye	1	>=0.20	SLC34A2 (5.2)	NDST4 (4.6)	VTCN1 (4.4)	TFAP2B (3.6)	EPB41L4A (3.5)	MMEL1 (3.5)	C15orf62 (3.4)	RARRES1 (3.4)	ATP13A4 (3.3)	PIWIL1 (3.2)	FRK (3.2)	ENSG00000163959 (3.2)	C1orf210 (3.1)	SLCO4C1 (3.0)	ARRDC3 (3.0)	ENSG00000204380 (3.0)	MSLN (2.9)	RERG (2.9)	USP37 (2.9)	P2RY6 (2.9)	ENSG00000254231 (2.9)	TMEM125 (2.8)	KYNU (2.8)	GJB5 (2.7)	SLC4A11 (2.7)
A09.371.060	Anterior Eye Segment	Sense Organs	Eye	1	>=0.20	SLC34A2 (5.1)	NDST4 (4.5)	VTCN1 (4.3)	TFAP2B (3.5)	EPB41L4A (3.5)	MMEL1 (3.4)	C15orf62 (3.4)	RARRES1 (3.3)	ATP13A4 (3.2)	PIWIL1 (3.2)	FRK (3.1)	ENSG00000163959 (3.1)	ENSG00000204380 (3.1)	C1orf210 (3.0)	SLCO4C1 (3.0)	ARRDC3 (2.9)	USP37 (2.9)	MSLN (2.9)	RERG (2.8)	ENSG00000254231 (2.8)	P2RY6 (2.8)	KYNU (2.8)	TMEM125 (2.8)	GJB5 (2.7)	C14orf93 (2.7)
A02.835.232.043.300	Foot Bones	Musculoskeletal System	Skeleton	1	>=0.20	SLC34A2 (4.9)	NDST4 (4.4)	VTCN1 (4.1)	TFAP2B (3.4)	MMEL1 (3.3)	EPB41L4A (3.2)	C15orf62 (3.2)	RARRES1 (3.1)	FRK (3.0)	ATP13A4 (3.0)	PIWIL1 (3.0)	ENSG00000163959 (2.9)	SLCO4C1 (2.9)	ARRDC3 (2.8)	C1orf210 (2.8)	KYNU (2.8)	ENSG00000204380 (2.8)	ENSG00000254231 (2.8)	USP37 (2.7)	P2RY6 (2.7)	MSLN (2.7)	RERG (2.7)	TMEM125 (2.6)	PSMB10 (2.6)	GJB5 (2.5)
A11.063	Antibody Producing Cells	Cells	Antibody-Producing Cells	1	>=0.20	TNFRSF17 (4.4)	WDR64 (4.1)	MC4R (4.0)	SPAG4 (3.9)	TXNDC11 (3.5)	ZPBP2 (3.3)	CPNE5 (3.3)	C11orf80 (3.2)	GABRR1 (3.2)	WDR74 (3.1)	ESR2 (3.1)	CCDC163P (3.1)	FRZB (3.1)	SYVN1 (3.1)	CD79B (3.1)	LMF1 (3.1)	CCR2 (3.1)	MEI1 (3.0)	FER1L4 (2.9)	MYH15 (2.9)	DENND5B (2.8)	CALHM3 (2.8)	GLCCI1 (2.8)	FKBP11 (2.8)	DNAJC4 (2.8)
A03.734	Pancreas	Digestive System	Pancreas	1	>=0.20	CPA2 (10.1)	SERPINI2 (6.6)	CTRL (6.4)	GPHA2 (4.3)	TMED6 (4.2)	NR5A2 (2.7)	ARL14 (2.7)	SLC4A4 (2.4)	PBLD (2.3)	CHST4 (2.3)	SLC3A1 (2.3)	SEPT2 (2.1)	ITGB6 (2.1)	PKHD1 (2.0)	OLFM4 (1.9)	ONECUT1 (1.9)	DPEP1 (1.9)	FAM3B (1.9)	NPNT (1.9)	HABP2 (1.9)	TMPRSS3 (1.7)	DNASE1 (1.6)	ZPLD1 (1.6)	NEURL3 (1.6)	GIPC2 (1.6)
A11.329	Connective Tissue Cells	Cells	Connective Tissue Cells	1	>=0.20	ENSG00000203446 (2.2)	ATP6V0D2 (2.1)	NEXN-AS1 (2.0)	PLA2G15 (2.0)	OLR1 (1.8)	SDCCAG8 (1.7)	ENTHD1 (1.7)	DNAJC13 (1.7)	ATG7 (1.6)	LACTB (1.6)	LAMP1 (1.6)	ENSG00000255496 (1.6)	AP4E1 (1.6)	MPV17 (1.5)	NR1H3 (1.5)	ENSG00000171658 (1.5)	CORO1C (1.5)	GLS (1.5)	ENSG00000246100 (1.5)	TEX14 (1.5)	IGF2R (1.5)	CYP27A1 (1.5)	LRP12 (1.5)	SPNS1 (1.5)	NRP1 (1.5)
A02.835.232.043	Bones of Lower Extremity	Musculoskeletal System	Skeleton	1	>=0.20	SLC34A2 (4.7)	NDST4 (4.2)	VTCN1 (4.0)	TFAP2B (3.3)	MMEL1 (3.1)	EPB41L4A (3.1)	C15orf62 (3.1)	RARRES1 (3.0)	FRK (2.9)	ATP13A4 (2.9)	PIWIL1 (2.9)	ENSG00000204380 (2.9)	ENSG00000163959 (2.8)	SLCO4C1 (2.8)	ARRDC3 (2.7)	C1orf210 (2.7)	KYNU (2.7)	P2RY6 (2.7)	ENSG00000254231 (2.6)	USP37 (2.6)	RERG (2.6)	MSLN (2.6)	TMEM125 (2.5)	PSMB10 (2.4)	GJB5 (2.4)
A11.118.637	Leukocytes	Cells	Blood Cells	1	>=0.20	TET3 (2.0)	GRK6 (2.0)	FMNL1 (2.0)	USP4 (2.0)	LIMD2 (2.0)	ANKRD44 (1.9)	IGFLR1 (1.9)	CCR3 (1.9)	DOCK2 (1.9)	MEI1 (1.9)	ARID5A (1.9)	STK4 (1.9)	GMIP (1.8)	CCR2 (1.8)	NFKB2 (1.8)	IL6R (1.8)	WDR64 (1.7)	DPEP2 (1.7)	RELT (1.7)	RARA (1.7)	TRABD (1.7)	EPN2-IT1 (1.7)	DPEP3 (1.7)	SIPA1 (1.7)	U2AF1L4 (1.7)
A15.145.229.637.555.567.562.725	Plasma Cells	Hemic and Immune Systems	Blood	1	>=0.20	MC4R (5.7)	WDR64 (5.4)	TNFRSF17 (5.3)	SPAG4 (5.3)	GABRR1 (4.8)	TXNDC11 (4.6)	FRZB (4.5)	LMF1 (4.4)	CCR2 (4.3)	ZBTB38 (4.1)	CCDC163P (4.1)	MEI1 (4.1)	DNAJC1 (4.0)	FER1L4 (4.0)	SPCS1 (4.0)	SIL1 (4.0)	C11orf80 (3.9)	ENSG00000229953 (3.8)	CPNE5 (3.8)	MYH15 (3.8)	FKBP11 (3.6)	SYVN1 (3.6)	MON1A (3.6)	ZPBP2 (3.6)	ERLEC1 (3.6)
A11.329.372.600	Macrophages Alveolar	Cells	Connective Tissue Cells	1	>=0.20	TEX14 (6.6)	ATP6V0D2 (6.4)	FAM82A2 (6.0)	CYP27A1 (5.9)	OLR1 (5.8)	ENSG00000203446 (5.2)	RXFP2 (4.8)	PAQR5 (4.7)	STAC (4.4)	PTPMT1 (4.3)	SGK3 (4.1)	GCHFR (4.1)	LRRD1 (4.1)	PLA2G15 (4.1)	OPN3 (4.0)	ENSG00000234708 (3.9)	HK3 (3.8)	TFEC (3.8)	C12orf59 (3.7)	ENSG00000171658 (3.7)	ENSG00000223526 (3.6)	AGRP (3.6)	NR1H3 (3.6)	ENSG00000245538 (3.6)	SPACA1 (3.5)
A03.556.500.760.464	Parotid Gland	Digestive System	Gastrointestinal Tract	1	>=0.20	ENSG00000248079 (5.0)	ENSG00000204380 (4.9)	SPTSSB (4.8)	ROPN1 (4.7)	ENSG00000257097 (4.4)	WFDC10A (4.3)	RCE1 (4.2)	LENG9 (4.2)	ENSG00000239791 (4.1)	COASY (4.0)	ENSG00000231204 (4.0)	OPRD1 (4.0)	H1FNT (4.0)	A2LD1 (3.9)	ENSG00000256529 (3.9)	GAL3ST4 (3.9)	KCNC2 (3.8)	ENSG00000237978 (3.8)	ENSG00000249163 (3.8)	CHRM3 (3.8)	GPR31 (3.7)	LMAN1L (3.7)	TSSK6 (3.7)	KRT18P50 (3.6)	ENSG00000247903 (3.6)
A15.145.693	Plasma	Hemic and Immune Systems	Blood	1	>=0.20	MC4R (5.7)	WDR64 (5.4)	TNFRSF17 (5.3)	SPAG4 (5.3)	GABRR1 (4.7)	TXNDC11 (4.6)	FRZB (4.5)	LMF1 (4.4)	CCR2 (4.3)	ZBTB38 (4.1)	CCDC163P (4.1)	MEI1 (4.1)	DNAJC1 (4.0)	FER1L4 (4.0)	SPCS1 (3.9)	SIL1 (3.9)	C11orf80 (3.9)	CPNE5 (3.8)	ENSG00000229953 (3.8)	MYH15 (3.8)	SYVN1 (3.6)	FKBP11 (3.6)	MON1A (3.6)	ERLEC1 (3.6)	ZPBP2 (3.5)
A10.549.400	Lymph Nodes	Tissues	Lymphoid Tissue	1	>=0.20	IL21 (4.4)	RGS13 (4.2)	IKZF3 (3.4)	CD19 (3.2)	ANKRD44-IT1 (3.0)	BANK1 (3.0)	PTPRCAP (3.0)	EOMES (2.8)	CD79B (2.7)	ENSG00000228853 (2.7)	MARCH1 (2.7)	DLEU2 (2.6)	CD40 (2.5)	STAG3 (2.5)	ZAP70 (2.5)	NLRC3 (2.5)	ENSG00000179577 (2.5)	NR1H3 (2.4)	ENSG00000257621 (2.4)	RPS2P45 (2.4)	ENSG00000251023 (2.4)	LINC00358 (2.4)	SYNRG (2.4)	C9orf148 (2.4)	CDK13 (2.4)
A15.378.316.580	Monocytes	Hemic and Immune Systems	Hematopoietic System	1	>=0.20	HK3 (3.4)	ENTHD1 (3.3)	PILRA (3.3)	TFEC (3.2)	SPI1 (3.1)	CYP27B1 (3.1)	SLC2A6 (3.0)	NINJ1 (2.9)	OLR1 (2.9)	SH3BP2 (2.9)	CATSPER1 (2.9)	PTAFR (2.8)	APOBR (2.8)	KYNU (2.8)	ATF3 (2.8)	CACNA2D4 (2.8)	PTPRJ (2.8)	DOT1L (2.8)	NAGA (2.7)	TMEM127 (2.7)	ZEB2 (2.7)	DAGLA (2.7)	SGK3 (2.6)	ATG7 (2.6)	NFAM1 (2.6)
A11.620	Muscle Cells	Cells	Muscle Cells	1	>=0.20	MIR2682 (5.9)	LY6K (5.7)	ENSG00000248698 (5.7)	CDH6 (5.3)	C7orf10 (3.6)	SLC12A4 (3.5)	EIF5A (3.5)	MTA2 (3.4)	C11orf24 (3.4)	ARSJ (3.4)	SLC39A13 (3.4)	HMGA2 (3.4)	TMCO7 (3.3)	NF2 (3.3)	ENSG00000255737 (3.2)	NRG1 (3.2)	PRSS12 (3.2)	ENSG00000253741 (3.1)	COL6A1 (3.1)	ALPL (3.1)	CREB3L1 (3.0)	WFDC11 (3.0)	DRAP1 (3.0)	ENSG00000235202 (3.0)	B4GALT2 (3.0)
A03.556.500.760	Salivary Glands	Digestive System	Gastrointestinal Tract	1	>=0.20	ROPN1 (5.2)	ENSG00000204380 (5.0)	ENSG00000248079 (4.5)	SPTSSB (4.3)	RCE1 (4.2)	COASY (4.1)	GPR31 (4.1)	ENSG00000231204 (4.0)	GAL3ST4 (4.0)	ENSG00000239791 (3.9)	WFDC10A (3.9)	H1FNT (3.9)	ENSG00000257097 (3.9)	CHRM3 (3.9)	OPRD1 (3.8)	LMAN1L (3.8)	LENG9 (3.8)	KRT18P50 (3.7)	ENSG00000249163 (3.7)	A2LD1 (3.7)	TESC (3.6)	WWC1 (3.6)	ENSG00000247903 (3.6)	ENSG00000256529 (3.6)	TSSK6 (3.5)
A15.382.216	Bone Marrow	Hemic and Immune Systems	Immune System	1	>=0.20	ENSG00000233236 (3.7)	FSCB (2.8)	ENSG00000227946 (2.8)	PDE6G (2.5)	TLX1NB (2.4)	WDR64 (2.3)	ITGA4 (2.3)	CCDC57 (2.3)	CTSW (2.3)	TLE4 (2.3)	ADRBK1 (2.3)	ENSG00000197727 (2.3)	CA1 (2.3)	TGFBRAP1 (2.2)	NAT6 (2.2)	ENSG00000226009 (2.2)	DHX30 (2.2)	KLF17 (2.2)	ENSG00000236370 (2.2)	ENSG00000217404 (2.1)	ZNF408 (2.1)	CD79B (2.1)	ANKRD31 (2.1)	ENSG00000227398 (2.1)	RASSF1 (2.0)
A15.382.520	Lymphatic System	Hemic and Immune Systems	Immune System	1	>=0.20	RGS13 (4.2)	IL21 (3.9)	IKZF3 (3.3)	CD19 (3.3)	PTPRCAP (3.0)	BANK1 (3.0)	CD79B (2.8)	ANKRD44-IT1 (2.8)	SYNRG (2.6)	STAG3 (2.5)	MARCH1 (2.5)	IL21R (2.5)	NLRC3 (2.4)	DLEU2 (2.4)	EOMES (2.4)	ZAP70 (2.3)	LIMD2 (2.3)	CD40 (2.3)	TRAF5 (2.2)	HSF5 (2.2)	TTC9C (2.2)	CDK13 (2.2)	TBC1D10C (2.2)	HVCN1 (2.1)	ENSG00000257621 (2.1)
A15.382.812	Mononuclear Phagocyte System	Hemic and Immune Systems	Immune System	1	>=0.20	TFEC (3.5)	HK3 (3.3)	PILRA (3.2)	ENSG00000203446 (3.1)	OLR1 (3.0)	CYP27B1 (3.0)	ENTHD1 (3.0)	SGK3 (2.9)	KYNU (2.8)	SLC2A6 (2.8)	PTPRJ (2.7)	SPI1 (2.7)	CD83 (2.7)	APOBR (2.7)	NAGA (2.7)	CYP27A1 (2.7)	ATP6V0D2 (2.6)	P2RX7 (2.6)	ATF3 (2.6)	ATG7 (2.6)	CATSPER1 (2.6)	PTAFR (2.6)	TMEM127 (2.5)	PMFBP1 (2.5)	IFI30 (2.5)
A15.145.229.637.555	Leukocytes Mononuclear	Hemic and Immune Systems	Blood	1	>=0.20	CCR2 (2.2)	MEI1 (2.0)	WDR64 (1.9)	ZBTB32 (1.9)	IGFLR1 (1.9)	ACSF3 (1.8)	GRK6 (1.8)	IL2 (1.7)	ENSG00000245025 (1.7)	ITPRIPL1 (1.7)	FLT3LG (1.7)	TXNDC11 (1.7)	SLC25A45 (1.7)	KBTBD8 (1.7)	TRABD (1.7)	CCDC57 (1.7)	ARID5A (1.7)	ANKRD44 (1.7)	IQCF2 (1.6)	FMNL1 (1.6)	C5orf39 (1.6)	ITGA4 (1.6)	NUP210 (1.6)	C7orf26 (1.6)	IL21R (1.6)
A15.382.812.522	Macrophages	Hemic and Immune Systems	Immune System	1	>=0.20	ATP6V0D2 (5.2)	ENSG00000203446 (4.7)	CYP27A1 (4.0)	ENTHD1 (3.8)	CYP27B1 (3.7)	OLR1 (3.6)	HK3 (3.5)	TFEC (3.5)	TEX14 (3.5)	PILRA (3.2)	ATG7 (3.2)	SGK3 (3.1)	P2RX7 (3.1)	NR1H3 (3.0)	PMFBP1 (2.9)	PLA2G15 (2.9)	PTPRJ (2.9)	CIR1 (2.9)	CCDC88A (2.9)	TTLL4 (2.9)	KYNU (2.8)	VAC14 (2.7)	ATF3 (2.7)	SPNS1 (2.6)	PPARGC1B (2.6)
A02.835.232	Bone and Bones	Musculoskeletal System	Skeleton	1	>=0.20	ENSG00000233236 (3.3)	ENSG00000227946 (2.5)	FSCB (2.5)	PDE6G (2.1)	ITGA4 (2.0)	TGFBRAP1 (2.0)	TLX1NB (2.0)	TLE4 (2.0)	CTSW (2.0)	ENSG00000217404 (2.0)	ENSG00000197727 (2.0)	WDR64 (2.0)	NAT6 (2.0)	CCDC57 (1.9)	CA1 (1.9)	DHX30 (1.9)	ADRBK1 (1.9)	KLF17 (1.9)	ZNF408 (1.9)	SYCE2 (1.9)	RASSF1 (1.8)	ENSG00000226009 (1.8)	ANKRD31 (1.8)	CD79B (1.8)	ENSG00000245213 (1.8)
A03.556.875.875	Stomach	Digestive System	Gastrointestinal Tract	1	>=0.20	KCNE2 (8.9)	GHRL (6.7)	ENSG00000177133 (3.4)	CPA2 (3.2)	PDE4C (3.1)	MLK7-AS1 (2.9)	ARL17A (2.8)	MST1R (2.7)	TMED6 (2.7)	C5orf32 (2.6)	ARL14 (2.6)	MFAP4 (2.5)	FER1L4 (2.4)	FOXP4 (2.4)	MUC1 (2.3)	MECOM (2.3)	CCDC48 (2.2)	TMPRSS3 (2.2)	MYOC (2.1)	CACNA1H (2.1)	ARHGAP12 (2.1)	CA2 (2.0)	CYP2C9 (2.0)	ENSG00000228853 (2.0)	GSDMB (2.0)
A10.165	Connective Tissue	Tissues	Connective Tissue	1	>=0.20	ENSG00000233236 (3.1)	ENSG00000227946 (2.4)	FSCB (2.3)	PDE6G (2.0)	ITGA4 (1.9)	TLX1NB (1.9)	TGFBRAP1 (1.9)	CTSW (1.9)	ENSG00000217404 (1.9)	TLE4 (1.9)	ENSG00000197727 (1.9)	NAT6 (1.8)	CA1 (1.8)	WDR64 (1.8)	CCDC57 (1.8)	RASSF1 (1.8)	ADRBK1 (1.8)	KLF17 (1.8)	ENSG00000234215 (1.8)	DHX30 (1.7)	ZNF408 (1.7)	ENSG00000236370 (1.7)	ENSG00000226009 (1.7)	SYCE2 (1.7)	CD79B (1.7)
A02.835	Skeleton	Musculoskeletal System	Skeleton	1	>=0.20	ENSG00000233236 (3.2)	ENSG00000227946 (2.4)	FSCB (2.4)	PDE6G (2.1)	ITGA4 (2.0)	TGFBRAP1 (2.0)	CTSW (2.0)	TLE4 (2.0)	ENSG00000217404 (2.0)	TLX1NB (1.9)	ENSG00000197727 (1.9)	WDR64 (1.9)	NAT6 (1.9)	CA1 (1.9)	DHX30 (1.9)	CCDC57 (1.9)	KLF17 (1.8)	ADRBK1 (1.8)	ZNF408 (1.8)	RASSF1 (1.8)	ENSG00000245213 (1.8)	SYCE2 (1.8)	CD79B (1.8)	ENSG00000236370 (1.7)	ANKRD31 (1.7)
A15.382	Immune System	Hemic and Immune Systems	Immune System	1	>=0.20	ENSG00000233236 (2.1)	WDR64 (1.9)	CCDC57 (1.9)	GRK6 (1.8)	ITGA4 (1.8)	CCR2 (1.8)	MEI1 (1.8)	TLE4 (1.8)	CTSW (1.8)	ENSG00000197727 (1.7)	PDE6G (1.7)	ADRBK1 (1.7)	CHD2 (1.7)	TET3 (1.7)	FMNL1 (1.7)	FSCB (1.7)	TRABD (1.7)	TLX1NB (1.6)	EPN2-IT1 (1.6)	CD79B (1.6)	FOXP1-AS1 (1.6)	GPHA2 (1.6)	ENSG00000231078 (1.6)	TOR2A (1.6)	U2AF1L4 (1.6)
A14.724.557	Nasopharynx	Stomatognathic System	Pharynx	1	>=0.20	ENSG00000224944 (7.4)	ENSG00000229243 (5.7)	ENSG00000254275 (5.6)	NPHP3-AS1 (5.5)	ENSG00000248118 (5.4)	ENSG00000259530 (5.4)	ENSG00000244791 (5.4)	ENSG00000229719 (5.4)	ENSG00000239440 (5.3)	ENSG00000234007 (5.3)	BSN-AS2 (5.3)	RANBP17 (5.2)	ENSG00000254143 (5.1)	ENSG00000229175 (4.9)	ENSG00000202089 (4.9)	ENSG00000234708 (4.8)	ENSG00000226497 (4.8)	HORMAD2 (4.7)	BCL2L14 (4.7)	ENSG00000235070 (4.7)	ENSG00000245651 (4.7)	C17orf47 (4.7)	OR5I1 (4.5)	ASB17 (4.5)	ENSG00000235724 (4.5)
A15.382.520.604.700	Spleen	Hemic and Immune Systems	Immune System	1	>=0.20	ENSG00000255691 (4.4)	KCNJ13 (4.3)	C20orf160 (3.5)	ENSG00000235665 (2.9)	ZAP70 (2.8)	ZBTB32 (2.8)	P2RY6 (2.8)	TMEM26 (2.7)	SYNRG (2.6)	PTPRCAP (2.6)	ITGA4 (2.4)	NOS3 (2.4)	PTPN22 (2.4)	RBL2 (2.4)	NCOA2 (2.3)	UBTF (2.2)	BANK1 (2.2)	OIT3 (2.2)	OSBPL10 (2.2)	USP34 (2.2)	NLRC3 (2.2)	LIMD2 (2.2)	IL21R (2.2)	DENND4A (2.2)	CD19 (2.1)
A05.360.319.887	Vulva	Urogenital System	Genitalia	1	>=0.20	ASPRV1 (5.4)	WFDC5 (5.0)	ELOVL3 (4.7)	ALDH3B2 (4.6)	DSC3 (4.5)	ENSG00000231453 (3.6)	TMEM79 (3.6)	IRX2 (3.3)	PARD6G (3.2)	SLURP1 (3.2)	HORMAD1 (3.1)	ATP6V1C2 (3.1)	COL7A1 (3.0)	MLANA (3.0)	GJB5 (2.9)	OVOL1 (2.8)	DUSP7 (2.7)	CLIC3 (2.7)	GLTP (2.7)	GSDMC (2.6)	RAB38 (2.6)	CST6 (2.6)	APCDD1 (2.5)	ANXA9 (2.5)	PPP1R39 (2.5)
A14.724	Pharynx	Stomatognathic System	Pharynx	1	>=0.20	ENSG00000224944 (4.4)	ENSG00000234708 (3.8)	ENSG00000235724 (3.4)	ENSG00000229243 (3.4)	ENSG00000229719 (3.3)	NPHP3-AS1 (3.3)	ENSG00000229175 (3.3)	ENSG00000244791 (3.3)	ENSG00000248118 (3.2)	ENSG00000224184 (3.2)	CD19 (3.1)	ENSG00000254275 (3.1)	ENSG00000239440 (3.1)	ENSG00000202089 (3.0)	ENSG00000259530 (3.0)	ENSG00000257636 (3.0)	ENSG00000234007 (3.0)	HTR3A (3.0)	HORMAD2 (2.9)	ENSG00000235070 (2.9)	SF3B2 (2.9)	ENSG00000254143 (2.9)	C17orf47 (2.9)	RGS13 (2.9)	GPR52 (2.9)
A03.620	Liver	Digestive System	Liver	1	>=0.20	APOF (12.6)	ITIH1 (12.4)	OIT3 (12.0)	CYP2C8 (11.5)	TAT (11.2)	SERPINC1 (10.8)	ENSG00000199488 (10.4)	CYP2C19 (10.2)	HABP2 (10.2)	CYP2C9 (10.1)	ITIH3 (10.1)	CYP1A2 (9.9)	SLC2A2 (9.9)	CPN1 (9.9)	F2 (9.8)	PAH (9.8)	HGFAC (9.8)	MAT1A (9.6)	DPYS (9.3)	SLC22A25 (9.2)	HP (9.1)	ENSG00000256162 (8.7)	HPD (8.5)	GCKR (8.0)	PROZ (8.0)
A15.145.300	Fetal Blood	Hemic and Immune Systems	Blood	1	>=0.20	KLF1 (5.4)	RAB2B (4.9)	RNF10 (4.8)	RANBP10 (4.4)	POLL (4.3)	NFE2 (4.0)	ITGA2B (3.9)	RNF123 (3.9)	ASCC2 (3.8)	TCP11L2 (3.8)	GYPC (3.7)	ENSG00000255477 (3.4)	LYL1 (3.3)	MRM1 (3.3)	CAMP (3.3)	GFI1B (3.3)	CCS (3.2)	CDKL1 (3.2)	TESC (3.1)	ENSG00000233236 (3.0)	CA1 (3.0)	PIP4K2A (3.0)	OSBP2 (3.0)	TUBB1 (2.9)	FAM65C (2.9)
A11.436	Epithelial Cells	Cells	Epithelial Cells	1	>=0.20	SLC9A11 (3.8)	VWA3B (3.1)	EFCAB6 (2.6)	DYDC1 (2.4)	TTC16 (2.4)	CCDC39 (2.4)	LRRC48 (2.2)	ENSG00000253741 (2.1)	WDR65 (2.0)	CCDC147 (2.0)	C6orf118 (2.0)	DYDC2 (1.9)	TTC29 (1.8)	MSH3 (1.8)	ENSG00000224738 (1.7)	DNAH11 (1.7)	ENSG00000248008 (1.7)	LY6K (1.7)	ZNHIT2 (1.7)	WDR96 (1.7)	ENSG00000256116 (1.6)	DNAI1 (1.6)	DTHD1 (1.6)	FAM154B (1.6)	LRGUK (1.6)
A14.549.167	Dentition	Stomatognathic System	Mouth	1	>=0.20	LHX8 (7.6)	CLDN20 (5.9)	TGM7 (5.8)	ENSG00000224127 (5.6)	DLX5 (3.3)	TGM5 (3.3)	TMEM79 (3.2)	ENSG00000259149 (3.2)	TSPAN10 (3.1)	CYP2C18 (3.1)	GPR52 (3.1)	WNT2B (3.0)	PARD6G (3.0)	ARL9 (2.9)	HTR3A (2.9)	WFDC9 (2.9)	SLURP1 (2.9)	RHOD (2.9)	DSC3 (2.7)	EVPLL (2.7)	MTA2 (2.7)	HCAR1 (2.7)	ENSG00000258066 (2.6)	SGCZ (2.6)	ENSG00000157837 (2.6)
A10.615.284	Extraembryonic Membranes	Tissues	Membranes	1	>=0.20	COLEC10 (7.1)	DSCR8 (4.3)	C12orf59 (3.9)	MAN1A2 (3.9)	HMGA2 (3.7)	ISM2 (3.6)	OLR1 (3.5)	DPP4 (3.5)	KRT18P38 (3.5)	GPR1 (3.5)	ENSG00000255496 (3.4)	RAB9BP1 (3.4)	PSG9 (3.3)	CDH13 (3.2)	PCDHGA11 (3.2)	CNIH3 (3.2)	ADAM12 (3.1)	PLAU (3.0)	ENSG00000235008 (3.0)	GH2 (3.0)	ADORA2B (3.0)	LMAN1 (2.9)	BDNF (2.9)	ENSG00000251565 (2.9)	CDCP1 (2.9)
A10.615.789	Serous Membrane	Tissues	Membranes	1	>=0.20	MSLN (3.4)	UPK3B (2.9)	BCHE (2.6)	JRK (2.3)	ENSG00000228853 (2.1)	HP (1.9)	EBF2 (1.8)	ENSG00000188693 (1.8)	ENSG00000252071 (1.8)	FOXP1-IT1 (1.8)	HUNK (1.8)	ENSG00000258220 (1.8)	ENSG00000234111 (1.7)	STAU1 (1.7)	DARC (1.7)	AVIL (1.7)	PLTP (1.7)	RBM6 (1.7)	SLIT3 (1.6)	RARRES2 (1.6)	KIAA1429 (1.6)	CALHM3 (1.6)	VPS28 (1.6)	C1R (1.6)	GLI3 (1.6)
A14.549	Mouth	Stomatognathic System	Mouth	1	>=0.20	LHX8 (5.2)	BNIPL (4.2)	SLURP1 (4.1)	CYP2C18 (3.9)	TMEM79 (3.9)	EVPLL (3.6)	CST6 (3.5)	BTBD11 (3.4)	SLC13A4 (3.4)	DSC3 (3.4)	OVOL1 (3.1)	ALDH3B2 (3.1)	RHOD (3.1)	SF3B3 (3.1)	ARL9 (2.9)	GLTP (2.9)	CLIC3 (2.9)	GJB5 (2.9)	GSDMC (2.8)	CES2 (2.8)	EMP1 (2.8)	TGM5 (2.7)	ECM1 (2.7)	MYL1 (2.7)	PARD6G (2.7)
A03.556.875	Upper Gastrointestinal Tract	Digestive System	Gastrointestinal Tract	1	>=0.20	KCNE2 (6.2)	GHRL (4.7)	CPA2 (2.8)	MLK7-AS1 (2.6)	PDE4C (2.6)	ARL17A (2.5)	MST1R (2.4)	ENSG00000228853 (2.3)	MFAP4 (2.3)	ENSG00000177133 (2.2)	ARL14 (2.2)	MYOC (2.2)	MUC1 (2.1)	ENSG00000249326 (2.1)	TMED6 (2.1)	MECOM (2.0)	C5orf32 (2.0)	LMOD1 (2.0)	C18orf45 (2.0)	CYP2C18 (2.0)	ENSG00000251455 (1.9)	PITPNB (1.9)	FSIP2 (1.9)	CYP2C9 (1.9)	ARHGAP12 (1.9)
A03.556.249.124	Ileum	Digestive System	Gastrointestinal Tract	1	>=0.20	CPO (11.3)	C17orf78 (10.0)	C10orf112 (9.5)	KCNJ13 (7.9)	GPR128 (7.1)	TM6SF2 (7.0)	SLC7A9 (6.9)	HNF4G (6.5)	NAALADL1 (6.2)	MOGAT3 (6.2)	DPEP1 (6.1)	GUCA2A (5.6)	CHST5 (5.4)	HHLA2 (4.7)	SLC2A2 (4.7)	APOB (4.6)	PLA2G12B (4.5)	VIL1 (4.5)	KCNH6 (4.2)	ENSG00000163959 (4.2)	TBX10 (4.2)	ENSG00000199488 (4.2)	IL2 (3.8)	CES2 (3.7)	OLFM4 (3.7)
A05.810.890	Urinary Bladder	Urogenital System	Urinary Tract	1	>=0.20	SNX31 (9.4)	UPK1A (7.0)	FER1L4 (4.8)	UPK3B (4.6)	SLITRK6 (3.6)	SSH3 (3.4)	DIRC1 (3.4)	FRRS1 (3.0)	HAS3 (2.9)	ENSG00000248975 (2.5)	OVOL1 (2.4)	PRDM7 (2.3)	ENSG00000228853 (2.3)	COL7A1 (2.2)	SLCO6A1 (2.2)	SEMA3F (2.1)	ASCC2 (2.1)	ARL14 (2.0)	FAM3B (2.0)	SLC44A5 (2.0)	C8orf55 (2.0)	ITGB6 (2.0)	RAI1 (2.0)	RALBP1 (1.9)	SPTSSB (1.9)
A11.436.397	Keratinocytes	Cells	Epithelial Cells	1	>=0.20	ARTN (6.1)	ALOXE3 (5.6)	UPK1A (5.4)	WFDC5 (4.2)	ANXA9 (4.2)	ASPRV1 (4.0)	ENSG00000179859 (4.0)	EVPLL (3.9)	ENSG00000171658 (3.9)	ENSG00000237101 (3.8)	RHOD (3.8)	ATP6V1C2 (3.7)	FAM160A1 (3.6)	GSDMC (3.5)	DUSP7 (3.5)	OVOL1 (3.4)	MYO1H (3.4)	PARD6G (3.3)	DLX2 (3.3)	MVK (3.2)	RPS6KA4 (3.2)	SMPD3 (3.1)	BNIPL (3.1)	HAS3 (3.1)	CYP27B1 (3.0)
A14.549.167.646	Periodontium	Stomatognathic System	Mouth	1	>=0.20	TGM7 (9.1)	CLDN20 (8.8)	TMEM79 (5.0)	CYP2C18 (4.9)	TGM5 (4.7)	SLURP1 (4.6)	EVPLL (4.5)	DSC3 (4.5)	ARL9 (4.4)	PARD6G (4.3)	ENSG00000259149 (4.2)	HTR3A (4.2)	WNT2B (4.1)	BNIPL (4.0)	GJB5 (3.9)	KCNK7 (3.8)	CLIC3 (3.8)	ENSG00000233117 (3.8)	ENSG00000258066 (3.8)	RHOD (3.7)	GSDMC (3.7)	GLTP (3.7)	TSPAN10 (3.7)	RPS6KB2 (3.6)	OVOL1 (3.6)
A14.549.885	Tongue	Stomatognathic System	Mouth	1	>=0.20	ENSG00000251329 (9.2)	C9orf117 (8.8)	ENSG00000229941 (7.0)	ENSG00000245768 (6.8)	ENSG00000249584 (4.9)	HORMAD1 (4.9)	EVPLL (4.7)	ENSG00000226747 (4.7)	ZNF408 (4.6)	WFDC10A (4.6)	ENSG00000258551 (4.5)	EIF2B5 (4.5)	CLDN20 (4.4)	ENSG00000258583 (4.2)	PPP3R2 (4.1)	TSPAN10 (4.0)	SGCZ (4.0)	ENSG00000253741 (3.9)	TCHP (3.8)	ENSG00000248176 (3.8)	IGSF11-AS1 (3.8)	ENSG00000233569 (3.7)	ENSG00000235519 (3.7)	METTL1 (3.7)	GMEB2 (3.6)
A03.556.875.500	Esophagus	Digestive System	Gastrointestinal Tract	1	>=0.20	FSIP2 (4.0)	DIRC1 (3.4)	UPK3B (3.2)	STK31 (3.1)	ENSG00000249326 (2.8)	ENSG00000228853 (2.5)	CYP2C18 (2.5)	FAM135A (2.3)	MST1R (2.2)	LMOD1 (2.2)	ENSG00000247903 (2.2)	MYOC (2.2)	PITPNB (2.1)	LINC00358 (2.1)	ARNTL2 (2.1)	ECM1 (2.1)	RHOD (2.0)	ARL17A (2.0)	FRRS1 (2.0)	PCDHGA10 (2.0)	ENSG00000188693 (2.0)	C18orf45 (2.0)	MTMR11 (2.0)	RAB25 (2.0)	MLK7-AS1 (2.0)
A03.556.249.249.209	Cecum	Digestive System	Gastrointestinal Tract	1	>=0.20	VIL1 (4.2)	ENSG00000188693 (4.2)	LINC00358 (4.1)	FRRS1 (4.0)	ENSG00000228853 (3.8)	ENSG00000248339 (3.6)	RNF43 (3.3)	OLFM4 (3.3)	HNF4G (3.3)	LINC00477 (3.1)	DPEP1 (3.0)	MSH4 (3.0)	MST1R (2.9)	HSD11B2 (2.8)	ENSG00000258779 (2.8)	BATF2 (2.7)	REPIN1 (2.6)	ARL14 (2.6)	BCL2L15 (2.5)	STK31 (2.5)	TOX3 (2.4)	C9orf140 (2.4)	FUK (2.3)	SATB2 (2.3)	PPP1R1B (2.2)
A10.615.550	Mucous Membrane	Tissues	Membranes	1	>=0.20	HHLA2 (3.6)	ENSG00000225953 (3.1)	ZBTB7C (3.1)	CES2 (3.0)	CHST5 (2.9)	GUCA2A (2.8)	BCL2L15 (2.8)	TMEM45B (2.7)	CA1 (2.7)	ENSG00000257512 (2.7)	SLC26A2 (2.7)	ENTPD5 (2.6)	PPP1R36 (2.6)	HSD11B2 (2.5)	TMEM171 (2.5)	MARVELD3 (2.4)	C1orf210 (2.4)	ARL14 (2.3)	CYP2C18 (2.3)	DHRS11 (2.3)	HNF4G (2.3)	STARD10 (2.3)	ENSG00000221724 (2.2)	MAGI3 (2.2)	RAPGEFL1 (2.1)
A05.360.319.679.256	Cervix Uteri	Urogenital System	Genitalia	1	>=0.20	ENSG00000228853 (4.1)	ENSG00000231453 (3.6)	ENSG00000188693 (3.4)	FRRS1 (3.3)	LINC00358 (3.2)	DIRC1 (3.2)	ENSG00000240280 (3.0)	SLCO6A1 (2.8)	ENSG00000249326 (2.5)	COL7A1 (2.4)	ENSG00000248975 (2.3)	ENSG00000258779 (2.2)	ENSG00000248339 (2.1)	TMPRSS3 (2.0)	ITGB6 (2.0)	HORMAD1 (2.0)	C18orf45 (1.9)	ENSG00000241131 (1.9)	ENSG00000233410 (1.9)	NEAT1 (1.8)	PITPNB (1.7)	LY6K (1.7)	PHIP (1.7)	IRF2BP2 (1.7)	ATF3 (1.6)
A10.615	Membranes	Tissues	Membranes	1	>=0.20	HHLA2 (2.9)	ZBTB7C (2.5)	ENSG00000225953 (2.4)	CES2 (2.4)	TMEM171 (2.3)	BCL2L15 (2.2)	GUCA2A (2.2)	SLC26A2 (2.2)	CHST5 (2.2)	PPP1R36 (2.1)	ENSG00000257512 (2.1)	TMEM45B (2.1)	ENTPD5 (2.1)	CA1 (2.1)	HSD11B2 (2.0)	MARVELD3 (1.9)	ARL14 (1.8)	C1orf210 (1.8)	CYP2C18 (1.8)	STARD10 (1.8)	HNF4G (1.8)	MAGI3 (1.8)	ERBB2 (1.8)	ENSG00000221724 (1.8)	ENSG00000259071 (1.7)
A03.556.124.684	Intestine Small	Digestive System	Gastrointestinal Tract	1	>=0.20	C17orf78 (7.8)	C10orf112 (6.8)	CPO (5.6)	KCNJ13 (4.9)	GPR128 (4.6)	SLC7A9 (4.4)	TM6SF2 (4.3)	HNF4G (4.0)	DPEP1 (3.9)	TMPRSS15 (3.8)	GIP (3.6)	CHST5 (3.3)	NAALADL1 (3.1)	MOGAT3 (3.0)	GUCA2A (3.0)	KCNH6 (3.0)	VIL1 (2.9)	APOB (2.9)	SLC2A2 (2.7)	PLA2G12B (2.5)	ENSG00000228853 (2.5)	ENSG00000199488 (2.4)	HHLA2 (2.4)	OLFM4 (2.4)	ARL14 (2.3)
A03.556.249.249.356.668	Colon Sigmoid	Digestive System	Gastrointestinal Tract	1	>=0.20	ENSG00000221724 (4.2)	HHLA2 (4.2)	GUCA2A (3.7)	ENSG00000249326 (3.5)	ARL14 (3.5)	VIL1 (3.5)	MTMR11 (3.1)	HSD11B2 (3.0)	RNF43 (3.0)	MOGAT3 (2.9)	SPIRE2 (2.9)	MST1R (2.8)	ENSG00000258779 (2.7)	SOX14 (2.7)	GPR128 (2.7)	OLFM4 (2.7)	CHST5 (2.6)	LINC00358 (2.5)	BCL2L15 (2.5)	SLC26A2 (2.5)	ENSG00000233569 (2.5)	DPEP1 (2.4)	ENTPD5 (2.4)	SLC26A6 (2.4)	CES2 (2.4)
A03.556.124.369	Intestinal Mucosa	Digestive System	Gastrointestinal Tract	1	>=0.20	ENSG00000225953 (7.9)	CHST5 (7.2)	CA1 (6.5)	HHLA2 (6.5)	GUCA2A (6.5)	ARL14 (5.8)	CA7 (5.8)	FOXD2 (5.6)	ENSG00000251169 (5.6)	BCL2L15 (5.4)	TMEM171 (5.2)	CPA6 (5.1)	GPR128 (5.0)	LINC00238 (4.9)	ENTPD5 (4.7)	HSD11B2 (4.7)	ENSG00000221724 (4.5)	MOGAT3 (4.5)	DHRS11 (4.2)	VIL1 (4.1)	TMED6 (4.1)	MARVELD3 (3.9)	SLC26A2 (3.8)	GIPC2 (3.8)	KIF16B (3.8)
A03.556.124.526.767	Rectum	Digestive System	Gastrointestinal Tract	1	>=0.20	DIRC1 (4.0)	VIL1 (3.7)	FRRS1 (3.4)	RNF43 (3.3)	ENSG00000228853 (3.3)	LINC00358 (3.3)	OLFM4 (3.2)	ENSG00000221724 (3.0)	ENSG00000249326 (3.0)	ARL14 (2.9)	CHST5 (2.8)	MST1R (2.8)	ENSG00000248975 (2.8)	DPEP1 (2.8)	HSD11B2 (2.7)	TCEB3B (2.6)	GUCA2A (2.6)	PRDM7 (2.6)	BCL2L15 (2.4)	MTMR11 (2.4)	ENSG00000251455 (2.4)	HHLA2 (2.4)	SATB2 (2.4)	FUK (2.3)	TMEM45B (2.3)
A03.556.249.249	Intestine Large	Digestive System	Gastrointestinal Tract	1	>=0.20	VIL1 (3.6)	RNF43 (3.3)	OLFM4 (3.0)	DPEP1 (3.0)	BCL2L15 (2.9)	ARL14 (2.8)	MST1R (2.8)	HSD11B2 (2.7)	HNF4G (2.7)	TOX3 (2.5)	GUCA2A (2.4)	MTMR11 (2.4)	MOGAT3 (2.4)	HHLA2 (2.4)	SATB2 (2.3)	TMEM45B (2.2)	GPR128 (2.2)	GRM8 (2.2)	MLEC (2.2)	KRTCAP3 (2.2)	FUK (2.2)	SPIRE2 (2.2)	C9orf140 (2.2)	FOXD2 (2.1)	ENSG00000221724 (2.1)
A03.556.124	Intestines	Digestive System	Gastrointestinal Tract	1	>=0.20	VIL1 (3.6)	BCL2L15 (3.2)	ARL14 (3.2)	OLFM4 (3.1)	GUCA2A (3.1)	RNF43 (3.0)	HHLA2 (3.0)	CHST5 (2.9)	HSD11B2 (2.9)	HNF4G (2.8)	GPR128 (2.8)	ENSG00000225953 (2.7)	MOGAT3 (2.7)	MST1R (2.7)	DPEP1 (2.6)	ENSG00000251169 (2.5)	TOX3 (2.5)	MTMR11 (2.5)	FOXD2 (2.5)	ENSG00000221724 (2.5)	TMEM45B (2.4)	SATB2 (2.4)	LINC00238 (2.3)	GIPC2 (2.3)	MLEC (2.3)
A03.556.249.249.356	Colon	Digestive System	Gastrointestinal Tract	1	>=0.20	VIL1 (3.5)	RNF43 (3.3)	DPEP1 (3.0)	BCL2L15 (3.0)	OLFM4 (3.0)	ARL14 (2.8)	MST1R (2.8)	HSD11B2 (2.7)	HNF4G (2.7)	TOX3 (2.5)	GUCA2A (2.5)	MOGAT3 (2.4)	HHLA2 (2.4)	MTMR11 (2.4)	SATB2 (2.3)	GRM8 (2.3)	TMEM45B (2.2)	MLEC (2.2)	GPR128 (2.2)	KRTCAP3 (2.2)	FOXD2 (2.2)	SPIRE2 (2.2)	C9orf140 (2.2)	FUK (2.1)	GIPC2 (2.1)
A03.556	Gastrointestinal Tract	Digestive System	Gastrointestinal Tract	1	>=0.20	VIL1 (2.6)	ARL14 (2.6)	RNF43 (2.6)	BCL2L15 (2.4)	OLFM4 (2.3)	HSD11B2 (2.3)	MST1R (2.3)	GUCA2A (2.2)	TMEM45B (2.2)	HHLA2 (2.2)	CHST5 (2.1)	HNF4G (2.1)	CES2 (2.1)	ENSG00000225953 (2.1)	GPR128 (2.1)	TOX3 (2.0)	DPEP1 (2.0)	MOGAT3 (1.9)	KRTCAP3 (1.9)	MTMR11 (1.9)	FOXD2 (1.9)	GIPC2 (1.9)	ENSG00000221724 (1.8)	ENSG00000251169 (1.8)	FUK (1.8)
A03.556.249	Lower Gastrointestinal Tract	Digestive System	Gastrointestinal Tract	1	>=0.20	VIL1 (3.6)	RNF43 (3.2)	DPEP1 (3.1)	OLFM4 (3.0)	BCL2L15 (2.9)	ARL14 (2.9)	HNF4G (2.8)	MST1R (2.7)	HSD11B2 (2.7)	GUCA2A (2.5)	MOGAT3 (2.5)	TOX3 (2.4)	HHLA2 (2.4)	GPR128 (2.4)	MTMR11 (2.4)	SATB2 (2.3)	TMEM45B (2.2)	CHST5 (2.2)	KRTCAP3 (2.2)	ENSG00000221724 (2.1)	FUK (2.1)	SPIRE2 (2.1)	MLEC (2.1)	GIPC2 (2.1)	ENSG00000251169 (2.1)
Notes: The distribution of tissue/cell type P values is such that only two of DEPICT's discretized false discovery rates (<0.01, >=0.20) are used in the table. We give the 25 genes in the DEPICT-defined loci with the strongest relative expression in each tissue/cell type. Results based on the full GWAS summary statistics (N = 1,131,881).

## Sheet: 7. DEPICT Genes
Supplementary Table 7. Genes in DEPICT-defined loci
Locus	Number of genes in locus	Chromosome and position	GWAS P-value	Ensembl gene ID	Gene symbol	Nominal P-value	Gene closest to lead SNP	FDR
rs2278433	1	chr19:38701646-38720354	4.28e-06	ENSG00000011332	DPF1	1.66e-32	TRUE	<0.01
rs9545395;rs936496;rs185989636;rs17811799	3	chr13:35516424-36705467	3.81e-11	ENSG00000172915	NBEA	5.89e-31	TRUE	<0.01
rs1815612;rs11588892	1	chr1:244214583-244220778	1.82e-06	ENSG00000179456	ZNF238	6.46e-31	TRUE	<0.01
rs12342546;rs1891642	2	chr9:126118449-126692431	1.11e-14	ENSG00000119522	DENND1A	7.58e-31	FALSE	<0.01
rs12477385;rs10184275;rs79337536;rs13035589;rs729869	3	chr2:166095912-166651192	7.15e-11	ENSG00000178662	CSRNP3	4.07e-30	TRUE	<0.01
rs8008076;rs11160916	1	chr14:29235050-29238870	2.13e-07	ENSG00000176165	FOXG1	1.93e-29	TRUE	<0.01
rs173003	11	chr19:36139125-36279724	5.5e-09	ENSG00000004777	ARHGAP33	3.3e-29	FALSE	<0.01
rs11235803	4	chr11:72975550-73309234	1.4e-06	ENSG00000054965	FAM168A	1.03e-28	TRUE	<0.01
rs1054442;rs80257979;rs11168951;rs11168828	15	chr12:49297286-49692465	1.1e-20	ENSG00000134287	ARF3	3.06e-28	FALSE	<0.01
rs2396366;rs138897545	5	chr19:1905371-2015702	7.72e-08	ENSG00000133243	BTBD2	6.87e-28	FALSE	<0.01
rs118132764	2	chr17:61086898-61523722	5.96e-07	ENSG00000170921	TANC2	9.23e-28	FALSE	<0.01
rs6534338;rs4295278;rs6836189	4	chr4:123073488-123542224	1.46e-11	ENSG00000138688	KIAA1109	9.88e-28	TRUE	<0.01
rs34394051;rs1011124;rs4908620;rs12088178	1	chr1:6845384-7827916	2.3e-09	ENSG00000171735	CAMTA1	1.04e-27	TRUE	<0.01
rs1335482;rs12754946;rs2647504;rs114020893	10	chr1:77747736-78835149	1.01e-11	ENSG00000077254	USP33	1.04e-27	FALSE	<0.01
rs17489649;rs149589042;rs2416214;rs56018004	3	chr5:108572821-109205326	2.77e-17	ENSG00000198961	PJA2	1.07e-27	FALSE	<0.01
rs6972278	2	chr7:94463216-94925727	5.88e-06	ENSG00000158528	PPP1R9A	1.26e-27	TRUE	<0.01
rs9655780;rs2470966;rs4730020;rs17706792;rs16869996;rs6961668	6	chr7:103969104-105039755	3.7e-16	ENSG00000135250	SRPK2	2.09e-27	FALSE	<0.01
rs71607150;rs11732852;rs13138842	2	chr4:158125334-158497306	3.27e-07	ENSG00000120251	GRIA2	5.89e-27	TRUE	<0.01
rs10411759	2	chr19:1815245-1863564	2.88e-09	ENSG00000129911	KLF16	1.14e-26	TRUE	<0.01
rs2303929;rs55813292	9	chr7:150642049-150841523	1.34e-07	ENSG00000133612	AGAP3	3.01e-26	FALSE	<0.01
rs66671632	1	chr8:143692410-143695833	2.24e-10	ENSG00000198576	ARC	3.08e-26	TRUE	<0.01
rs11678980;rs6760887;rs114952970;rs62194170;rs147303474;rs62188141;rs79997166;rs730289;rs16845572;rs116270371;rs150032378	5	chr2:161993419-162282381	1.6e-31	ENSG00000136535	TBR1	6.34e-26	TRUE	<0.01
rs12461072	6	chr19:18208603-18359010	8.98e-07	ENSG00000105647	PIK3R2	8.62e-26	FALSE	<0.01
rs12028010;rs2364544;rs11209894;rs72665647	5	chr1:41445007-41849262	9.78e-23	ENSG00000204060	FOXO6	1.49e-25	TRUE	<0.01
rs61748951	28	chr1:155158300-156182587	1.31e-08	ENSG00000116539	ASH1L	2.66e-25	FALSE	<0.01
rs2072927	6	chr1:1656277-1935276	1.48e-06	ENSG00000078369	GNB1	4.29e-25	FALSE	<0.01
rs4255791	1	chr16:28303840-28335170	2.51e-08	ENSG00000188322	SBK1	9.83e-25	TRUE	<0.01
rs3103307;rs11537608;rs62070648	12	chr17:28575223-29708905	2.04e-07	ENSG00000196712	NF1	2.03e-24	FALSE	<0.01
rs4512319	4	chr7:91570181-92030698	2.13e-07	ENSG00000127914	AKAP9	2.31e-24	FALSE	<0.01
rs117340654;rs642803;rs585557;rs76878669;rs35947684;rs118151305;rs10896139;rs116864252;rs4930188;rs35111506;rs72939178;rs479018;rs7127808;rs7120517;rs118011160;rs117309574	93	chr11:65029233-67407031	3.1e-17	ENSG00000174871	CNIH2	2.36e-24	FALSE	<0.01
rs13018640;rs71413877;rs72819118;rs192225848;rs72821189;rs10166286;rs10168615;rs17023131;rs79430745;rs6715321;rs4851263;rs4851338;rs13009915;rs1346620;rs77826402;rs62147651;rs62156361;rs6733011;rs11690621;rs116398129;rs111377325;rs11690494;rs744145	19	chr2:99061317-101034118	1.05e-50	ENSG00000170500	LONRF2	2.4e-24	TRUE	<0.01
rs2469226;rs67418609	5	chr15:76352178-77242601	1.28e-08	ENSG00000140386	SCAPER	3.3e-24	FALSE	<0.01
rs62174974;rs10205057;rs115438240;rs2193615;rs7590852	3	chr2:185463093-186698017	3.67e-10	ENSG00000170396	ZNF804A	4.36e-24	TRUE	<0.01
rs6731373	2	chr2:68358370-68488362	1.39e-14	ENSG00000221823	PPP3R1	6.64e-24	TRUE	<0.01
rs10844179	2	chr12:32259769-32798984	5.03e-10	ENSG00000151746	BICD1	7.81e-24	FALSE	<0.01
rs4919624;rs73344830;rs118079769;rs11190955;rs11596387;rs61874089;rs11191206;rs117104675;rs3781292;rs118059379;rs75709864	21	chr10:103113820-104192418	1e-32	ENSG00000198408	MGEA5	1.34e-23	FALSE	<0.01
rs1910005;rs11744829	1	chr5:80708840-81047616	5.66e-09	ENSG00000145687	SSBP2	2.51e-23	TRUE	<0.01
rs12453682	9	chr17:37408897-37884915	1.81e-11	ENSG00000171532	NEUROD2	3.94e-23	TRUE	<0.01
rs145054300;rs77675579	19	chr11:46299212-47357945	7.18e-08	ENSG00000110514	MADD	5.49e-23	FALSE	<0.01
rs58125559;rs35773761;rs73497522	5	chr16:1560428-1820318	1.34e-07	ENSG00000138834	MAPK8IP3	8.54e-23	FALSE	<0.01
rs151257075;rs16837272	17	chr1:156182773-156647189	7.96e-06	ENSG00000116604	MEF2D	1.1e-22	FALSE	<0.01
rs34262657;rs11631042	2	chr15:63796793-64126147	2.84e-10	ENSG00000103657	HERC1	1.75e-22	FALSE	<0.01
rs12888615;rs2332752;rs149671;rs10130488;rs6574018	3	chr14:71787166-73030654	9.42e-12	ENSG00000197555	SIPA1L1	1.84e-22	TRUE	<0.01
rs2336721;rs6802671;rs77321042	20	chr3:52350335-53226733	1.05e-10	ENSG00000010322	NISCH	2.37e-22	FALSE	<0.01
rs4984682	16	chr16:616995-818865	1.82e-16	ENSG00000127585	FBXL16	2.8e-22	FALSE	<0.01
rs4348041	1	chr4:5749811-5894785	5e-06	ENSG00000072832	CRMP1	3.25e-22	TRUE	<0.01
rs117340654;rs642803;rs585557;rs76878669;rs35947684;rs118151305;rs10896139;rs116864252;rs4930188;rs35111506;rs72939178;rs479018;rs7127808;rs7120517;rs118011160;rs117309574	93	chr11:65029233-67407031	3.1e-17	ENSG00000174996	KLC2	3.32e-22	TRUE	<0.01
rs13163062;rs252991;rs1593022;rs1559244;rs34410;rs55876360;rs12515656;rs67338857;rs2454897;rs13167810;rs11948860	2	chr5:106712590-107717799	4.43e-16	ENSG00000145743	FBXL17	3.97e-22	TRUE	<0.01
rs939592	4	chr1:151584541-151743808	1.99e-07	ENSG00000143376	SNX27	5.14e-22	FALSE	<0.01
rs6720630;rs80226210	2	chr2:48010221-48132932	4.59e-07	ENSG00000138081	FBXO11	6.11e-22	TRUE	<0.01
rs853199	5	chr17:35441923-35969488	1.76e-06	ENSG00000006114	SYNRG	6.12e-22	FALSE	<0.01
rs9611597;rs9607859;rs4822112;rs148537066;rs2899355;rs2142695	35	chr22:41165634-42828401	2.3e-08	ENSG00000100167	SEPT3	8.49e-22	FALSE	<0.01
rs7218235	1	chr17:2496923-2588909	2.44e-08	ENSG00000007168	PAFAH1B1	8.96e-22	FALSE	<0.01
rs1747714;rs9423846;rs72772094	1	chr10:11047259-11378666	3.82e-14	ENSG00000048740	CELF2	9.05e-22	FALSE	<0.01
rs2447097	2	chr17:2240806-2304412	1.1e-11	ENSG00000141258	SGSM2	9.45e-22	FALSE	<0.01
rs3811038	4	chr2:112895962-113290227	7.54e-06	ENSG00000114999	TTL	1.04e-21	TRUE	<0.01
rs114352120	7	chr5:64813593-65167553	2.8e-07	ENSG00000197860	SGTB	1.97e-21	FALSE	<0.01
rs312927;rs113646375;rs4807428	1	chr19:3224701-3297074	2.52e-11	ENSG00000161082	CELF5	1.97e-21	TRUE	<0.01
rs5002966	1	chr5:21750777-22853731	8.4e-08	ENSG00000154162	CDH12	2.01e-21	FALSE	<0.01
rs2314338;rs118101047;rs507671;rs112199584	9	chr17:38278790-38613983	9.5e-09	ENSG00000171475	WIPF2	2.09e-21	TRUE	<0.01
rs1245829	1	chr12:79257773-79845788	3.29e-12	ENSG00000067715	SYT1	2.27e-21	FALSE	<0.01
rs4919624;rs73344830;rs118079769;rs11190955;rs11596387;rs61874089;rs11191206;rs117104675;rs3781292;rs118059379;rs75709864	21	chr10:103113820-104192418	1e-32	ENSG00000166167	BTRC	6.82e-21	TRUE	<0.01
rs15739	8	chr17:15848231-16256813	6.08e-07	ENSG00000141027	NCOR1	7.19e-21	FALSE	<0.01
rs1815532;rs8013401;rs12590545;rs61989562	7	chr14:66953072-67878917	8.01e-08	ENSG00000171723	GPHN	1.05e-20	FALSE	<0.01
rs114468556;rs17669337;rs141834426;rs6890998;rs2029401;rs10074178;rs17315154;rs6873367;rs13175613;rs10059375	8	chr5:92746995-94620279	1.99e-16	ENSG00000113391	FAM172A	1.47e-20	TRUE	<0.01
rs6774533;rs9871209	1	chr3:62384021-62861064	4.18e-09	ENSG00000163618	CADPS	1.88e-20	FALSE	<0.01
rs10798888;rs645891	2	chr1:32117848-32230494	5.15e-14	ENSG00000121753	BAI2	2.76e-20	TRUE	<0.01
rs1453213	1	chr8:107282473-107764922	1.1e-07	ENSG00000164830	OXR1	3.72e-20	FALSE	<0.01
rs74415461;rs118124826;rs35754755;rs4785577;rs9673820;rs9932312;rs12917772;rs8047204	26	chr16:89154783-90142338	6.25e-12	ENSG00000158792	SPATA2L	3.91e-20	TRUE	<0.01
rs431392	1	chr12:120123595-120315095	9.33e-06	ENSG00000122966	CIT	4.64e-20	TRUE	<0.01
rs9446060;rs644877;rs1006997	2	chr6:69342555-70099403	4.33e-08	ENSG00000135298	BAI3	4.97e-20	TRUE	<0.01
rs72634813	2	chr1:1533392-1565990	8.85e-06	ENSG00000197530	MIB2	5.64e-20	FALSE	<0.01
rs10979613;rs10816784	6	chr9:111629797-112083244	1.25e-15	ENSG00000136805	C9orf4	9.19e-20	TRUE	<0.01
rs7849487;rs4740635;rs76752728;rs3847228;rs11794748	1	chr9:2015342-2193624	1.25e-29	ENSG00000080503	SMARCA2	1e-19	TRUE	<0.01
rs721579;rs56319902;rs538628;rs143699161;rs11657021	14	chr17:43340488-44896082	5.81e-33	ENSG00000186868	MAPT	1.03e-19	FALSE	<0.01
rs2729762;rs35346988;rs4638330	7	chr11:76839310-77705724	3.03e-07	ENSG00000149269	PAK1	1.04e-19	TRUE	<0.01
rs17502934;rs939400;rs12620796;rs34967124;rs6726487;rs10168826;rs3914727;rs1217437	1	chr2:50145643-51259674	2.12e-17	ENSG00000179915	NRXN1	1.11e-19	TRUE	<0.01
rs827951	1	chr6:158733692-158932860	1.31e-06	ENSG00000130338	TULP4	1.29e-19	FALSE	<0.01
rs1057908	2	chr12:49207577-49246625	2.57e-06	ENSG00000167535	CACNB3	1.33e-19	FALSE	<0.01
rs11082011;rs62081488;rs1963381;rs1187264;rs72893129;rs34362479;rs3888345;rs1944800;rs17561693;rs147994777;rs7244724	1	chr18:34823010-35146000	2.06e-38	ENSG00000101489	CELF4	1.42e-19	TRUE	<0.01
rs6905041	3	chr6:110931181-111347303	5.65e-07	ENSG00000155111	CDK19	1.51e-19	FALSE	<0.01
rs113801542	4	chr6:71122644-71666741	8.81e-08	ENSG00000112305	SMAP1	1.61e-19	FALSE	<0.01
rs2301586	6	chr22:29601840-29819168	2.01e-06	ENSG00000100276	RASL10A	1.63e-19	FALSE	<0.01
rs7502541;rs9902820;rs62082093	14	chr17:56422539-57353322	3.9e-07	ENSG00000175175	PPM1E	1.66e-19	FALSE	<0.01
rs2039204	8	chr9:130267618-130541020	5.23e-09	ENSG00000136854	STXBP1	1.73e-19	TRUE	<0.01
rs7729926;rs72801644	13	chr5:137203480-137772717	1.16e-06	ENSG00000031003	FAM13B	1.73e-19	FALSE	<0.01
rs2055940;rs4279178	2	chr4:46920917-47428461	4.95e-08	ENSG00000109158	GABRA4	3.12e-19	TRUE	<0.01
rs12151248;rs118040169;rs7408934;rs56252104;rs79105431;rs62109939;rs11775;rs9941452	7	chr19:13080432-13265716	3.81e-11	ENSG00000160877	NACC1	3.19e-19	TRUE	<0.01
rs74453875;rs62260764;rs11709573;rs9859556;rs3172494;rs74473238;rs144519232;rs55786114;rs2624818;rs71325001;rs34037363;rs55689339;rs141260127;rs112269639;rs11716398;rs190848966;rs55935606;rs62263033;rs116033001;rs77719387;rs140021702;rs6780575;rs3731507;rs116656374;rs62248598;rs182355396;rs1264194;rs73083140;rs113893318;rs116192940;rs138484388;rs736471;rs11720093;rs140269757;rs114182490;rs7308914…	107	chr3:46899362-52090566	4.61e-82	ENSG00000164076	CAMKV	3.25e-19	TRUE	<0.01
rs793191	2	chr12:31516415-31744031	1.93e-07	ENSG00000170456	DENND5B	5.34e-19	FALSE	<0.01
rs73106136	1	chr20:43514317-43537173	1.05e-08	ENSG00000166913	YWHAB	5.72e-19	TRUE	<0.01
rs11172134	2	chr12:57643392-57845842	1.48e-06	ENSG00000179912	R3HDM2	6.16e-19	FALSE	<0.01
rs78393250	14	chr11:47376411-48192393	1.79e-06	ENSG00000149187	CELF1	1.08e-18	FALSE	<0.01
rs9611597;rs9607859;rs4822112;rs148537066;rs2899355;rs2142695	35	chr22:41165634-42828401	2.3e-08	ENSG00000167074	TEF	1.4e-18	FALSE	<0.01
rs1076780	1	chr22:50781733-50883514	5.42e-06	ENSG00000100239	PPP6R2	1.74e-18	FALSE	<0.01
rs9347403;rs113588399;rs13216156;rs59658357;rs1007250	2	chr6:157099063-157744633	1.67e-09	ENSG00000049618	ARID1B	1.82e-18	TRUE	<0.01
rs2368449	1	chr19:3630182-3700463	7.08e-07	ENSG00000186111	PIP5K1C	1.87e-18	FALSE	<0.01
rs10041403;rs34309;rs3730088;rs34808696	1	chr5:67511548-67597649	1.55e-15	ENSG00000145675	PIK3R1	1.91e-18	TRUE	<0.01
rs74453875;rs62260764;rs11709573;rs9859556;rs3172494;rs74473238;rs144519232;rs55786114;rs2624818;rs71325001;rs34037363;rs55689339;rs141260127;rs112269639;rs11716398;rs190848966;rs55935606;rs62263033;rs116033001;rs77719387;rs140021702;rs6780575;rs3731507;rs116656374;rs62248598;rs182355396;rs1264194;rs73083140;rs113893318;rs116192940;rs138484388;rs736471;rs11720093;rs140269757;rs114182490;rs7308914…	107	chr3:46899362-52090566	4.61e-82	ENSG00000088538	DOCK3	1.91e-18	TRUE	<0.01
rs939592	4	chr1:151584541-151743808	1.99e-07	ENSG00000159409	CELF3	1.96e-18	TRUE	<0.01
rs4793090	11	chr17:40554468-40829048	1.67e-08	ENSG00000033627	ATP6V0A1	2.91e-18	FALSE	<0.01
rs2160514;rs1671476;rs1671528;rs4763452	2	chr12:16500076-16763528	2.54e-11	ENSG00000048540	LMO3	3.34e-18	TRUE	<0.01
rs4731413;rs10244329;rs75278839;rs140291167;rs4731392;rs10239419;rs53125	7	chr7:126986844-127897681	5.08e-14	ENSG00000128594	LRRC4	3.88e-18	TRUE	<0.01
rs2447097	2	chr17:2240806-2304412	1.1e-11	ENSG00000070444	MNT	4.88e-18	TRUE	<0.01
rs3748988;rs79018948	1	chr2:1792885-2335032	2.79e-07	ENSG00000186487	MYT1L	5.86e-18	TRUE	<0.01
rs12671060	1	chr7:107788082-108097161	9.7e-07	ENSG00000091129	NRCAM	6.11e-18	TRUE	<0.01
rs1437394	1	chr2:55514978-55647057	5.14e-08	ENSG00000115355	CCDC88A	6.4e-18	TRUE	<0.01
rs190152;rs73348977	7	chr14:45366498-45670093	3.27e-07	ENSG00000198718	FAM179B	6.45e-18	FALSE	<0.01
rs721579;rs56319902;rs538628;rs143699161;rs11657021	14	chr17:43340488-44896082	5.81e-33	ENSG00000073969	NSF	7.65e-18	FALSE	<0.01
rs7693161	1	chr4:184774584-184938894	6.88e-08	ENSG00000173320	STOX2	8.72e-18	TRUE	<0.01
rs363096;rs362307;rs4690081;rs6853599;rs6824567;rs116069820	12	chr4:2794750-3451211	5.77e-24	ENSG00000087274	ADD1	9.96e-18	TRUE	<0.01
rs9540718;rs76876592;rs7338439	1	chr13:66876967-67804468	1.88e-10	ENSG00000184226	PCDH9	1e-17	TRUE	<0.01
rs3751331;rs138569349;rs1148547	20	chr12:57984957-58351052	1.75e-11	ENSG00000178498	DTX3	1.01e-17	FALSE	<0.01
rs1024268;rs10789285;rs663251;rs1341788	1	chr1:70034081-70589164	3.4e-09	ENSG00000033122	LRRC7	1.93e-17	TRUE	<0.01
rs67224963	2	chr5:63461671-63908139	7.19e-11	ENSG00000186479	RGS7BP	1.97e-17	TRUE	<0.01
rs12765185	2	chr10:134884433-135039916	2.96e-08	ENSG00000197177	GPR123	2.37e-17	FALSE	<0.01
rs60551751;rs9546554;rs61960218	1	chr13:84451344-84456528	1.89e-06	ENSG00000178235	SLITRK1	2.5e-17	TRUE	<0.01
rs11708163;rs1849509	1	chr3:131252399-132004254	6.63e-08	ENSG00000196353	CPNE4	2.7e-17	TRUE	<0.01
rs563954;rs67661275;rs10894594;rs1506876;rs7123307;rs1911252	1	chr11:132284871-133402414	1.34e-08	ENSG00000183715	OPCML	2.9e-17	TRUE	<0.01
rs4691601;rs998886;rs34637277	1	chr4:160025330-160281321	2.46e-16	ENSG00000109756	RAPGEF2	3.06e-17	TRUE	<0.01
rs61104616;rs324885;rs193706;rs141729694;rs72771860;rs16903468;rs2365376;rs56324019;rs115732298;rs79486459;rs16903288;rs28582119;rs10474278	8	chr5:87485450-88762215	1.56e-34	ENSG00000081189	MEF2C	3.09e-17	TRUE	<0.01
rs7313065	1	chr12:53458388-53473204	1.52e-07	ENSG00000167778	SPRYD3	3.55e-17	TRUE	<0.01
rs13388333;rs62191669	4	chr2:242166679-242449145	6.48e-09	ENSG00000115694	STK25	3.7e-17	TRUE	<0.01
rs138056327	3	chr4:118954773-119274158	1.24e-06	ENSG00000164100	NDST3	3.73e-17	TRUE	<0.01
rs36120534	1	chr20:17206752-17465223	3.77e-08	ENSG00000125851	PCSK2	3.73e-17	FALSE	<0.01
rs11703948	1	chr22:38822332-38851205	1.26e-12	ENSG00000168135	KCNJ4	3.84e-17	FALSE	<0.01
rs2333218	1	chr3:124944405-125094198	1.4e-07	ENSG00000163848	ZNF148	4.35e-17	TRUE	<0.01
rs4839155;rs1538389;rs2076586;rs197420	5	chr1:112084840-112531777	4.66e-12	ENSG00000197852	C1orf183	4.64e-17	TRUE	<0.01
rs10208;rs2521602	2	chr17:42269174-42298994	2.07e-09	ENSG00000087152	ATXN7L3	5.43e-17	FALSE	<0.01
rs7612549;rs9814482;rs76387355	1	chr3:35680437-35835988	1.65e-07	ENSG00000172995	ARPP21	5.74e-17	TRUE	<0.01
rs3897821;rs10927053;rs2994326;rs78631843;rs10927006;rs114025835;rs10803136;rs10926940	3	chr1:243219131-244014381	3.58e-25	ENSG00000117020	AKT3	5.74e-17	TRUE	<0.01
rs74453875;rs62260764;rs11709573;rs9859556;rs3172494;rs74473238;rs144519232;rs55786114;rs2624818;rs71325001;rs34037363;rs55689339;rs141260127;rs112269639;rs11716398;rs190848966;rs55935606;rs62263033;rs116033001;rs77719387;rs140021702;rs6780575;rs3731507;rs116656374;rs62248598;rs182355396;rs1264194;rs73083140;rs113893318;rs116192940;rs138484388;rs736471;rs11720093;rs140269757;rs114182490;rs7308914…	107	chr3:46899362-52090566	4.61e-82	ENSG00000047849	MAP4	6.39e-17	TRUE	<0.01
rs2288799;rs4958869	1	chr5:149599054-149669854	8.27e-07	ENSG00000070808	CAMK2A	6.69e-17	TRUE	<0.01
rs35550545;rs188415602;rs12718416;rs192569608;rs144581493	33	chr1:149900543-151098018	1.04e-07	ENSG00000143420	ENSA	8.41e-17	FALSE	<0.01
rs145054300;rs77675579	19	chr11:46299212-47357945	7.18e-08	ENSG00000149179	C11orf49	8.82e-17	FALSE	<0.01
rs9611597;rs9607859;rs4822112;rs148537066;rs2899355;rs2142695	35	chr22:41165634-42828401	2.3e-08	ENSG00000100403	ZC3H7B	9.33e-17	FALSE	<0.01
rs117340654;rs642803;rs585557;rs76878669;rs35947684;rs118151305;rs10896139;rs116864252;rs4930188;rs35111506;rs72939178;rs479018;rs7127808;rs7120517;rs118011160;rs117309574	93	chr11:65029233-67407031	3.1e-17	ENSG00000174576	NPAS4	1.47e-16	FALSE	<0.01
rs79607119	3	chr2:120302008-120741394	1.03e-06	ENSG00000088179	PTPN4	1.59e-16	FALSE	<0.01
rs182902112;rs6580046;rs1461224;rs962356;rs11167672;rs2964255;rs190724856;rs72806710;rs72799269;rs17515793	5	chr5:151771093-153800544	6.34e-09	ENSG00000155511	GRIA1	1.6e-16	TRUE	<0.01
rs7012546;rs2334119;rs3098210	1	chr8:104512976-105268322	1.25e-10	ENSG00000176406	RIMS2	1.78e-16	FALSE	<0.01
rs13422673;rs80077995;rs799810;rs707115;rs707078	2	chr2:154728426-155714863	6.48e-15	ENSG00000162989	KCNJ3	1.97e-16	TRUE	<0.01
rs10786544;rs4589234;rs1923575	1	chr10:83635070-84746723	1.35e-06	ENSG00000185737	NRG3	2.01e-16	TRUE	<0.01
rs112806496;rs11894424;rs2916490;rs60030196;rs75931210	1	chr2:79412357-80875905	1.72e-10	ENSG00000066032	CTNNA2	2.12e-16	FALSE	<0.01
rs145054300;rs77675579	19	chr11:46299212-47357945	7.18e-08	ENSG00000149091	DGKZ	2.12e-16	TRUE	<0.01
rs4787983;rs991911	1	chr16:24266874-24374122	2.44e-07	ENSG00000006116	CACNG3	2.6e-16	TRUE	<0.01
rs2740795	5	chr8:91803778-92099323	7.71e-10	ENSG00000123119	NECAB1	2.91e-16	FALSE	<0.01
rs7218758	1	chr17:27717943-27871502	5.2e-07	ENSG00000160551	TAOK1	3.19e-16	TRUE	<0.01
rs2131167	1	chr12:99120235-100378432	1.52e-08	ENSG00000185046	ANKS1B	3.24e-16	FALSE	<0.01
rs74453875;rs62260764;rs11709573;rs9859556;rs3172494;rs74473238;rs144519232;rs55786114;rs2624818;rs71325001;rs34037363;rs55689339;rs141260127;rs112269639;rs11716398;rs190848966;rs55935606;rs62263033;rs116033001;rs77719387;rs140021702;rs6780575;rs3731507;rs116656374;rs62248598;rs182355396;rs1264194;rs73083140;rs113893318;rs116192940;rs138484388;rs736471;rs11720093;rs140269757;rs114182490;rs7308914…	107	chr3:46899362-52090566	4.61e-82	ENSG00000164061	BSN	3.49e-16	FALSE	<0.01
rs1051860;rs71414197	5	chr14:58466453-58840605	3.29e-08	ENSG00000032219	ARID4A	3.72e-16	FALSE	<0.01
rs4726070;rs2058495	2	chr7:151163098-151574210	1.36e-17	ENSG00000106615	RHEB	3.8e-16	TRUE	<0.01
rs62181533	1	chr2:192813769-193060435	4.14e-07	ENSG00000144339	TMEFF2	3.83e-16	TRUE	<0.01
rs72482130;rs4663617;rs62190914;rs13034294;rs6710615;rs3820781	2	chr2:236402733-237077012	4.59e-13	ENSG00000157985	AGAP1	3.88e-16	TRUE	<0.01
rs1934363	2	chr10:28811581-28909928	8.23e-08	ENSG00000095787	WAC	3.97e-16	TRUE	<0.01
rs10983324;rs4633129	2	chr9:119187504-120177348	3.55e-08	ENSG00000148219	ASTN2	4.02e-16	TRUE	<0.01
rs9888796;rs62059344;rs255053;rs111965666;rs3868142	51	chr16:67143915-68601039	1.2e-12	ENSG00000196123	KIAA0895L	4.28e-16	FALSE	<0.01
rs12461072	6	chr19:18208603-18359010	8.98e-07	ENSG00000105649	RAB3A	4.92e-16	TRUE	<0.01
rs17883331;rs35814703	2	chr19:4909510-5153606	1.29e-09	ENSG00000127663	KDM4B	5.84e-16	TRUE	<0.01
rs4919624;rs73344830;rs118079769;rs11190955;rs11596387;rs61874089;rs11191206;rs117104675;rs3781292;rs118059379;rs75709864	21	chr10:103113820-104192418	1e-32	ENSG00000059915	PSD	5.9e-16	FALSE	<0.01
rs12568267;rs11589736	4	chr1:220141943-220445796	1.47e-06	ENSG00000118873	RAB3GAP2	6.96e-16	TRUE	<0.01
rs34363861	5	chr2:73300510-73511559	8.69e-10	ENSG00000163013	FBXO41	7.35e-16	TRUE	<0.01
rs1405876;rs2373124;rs6973215;rs142830375	1	chr7:86273230-86494200	7.84e-14	ENSG00000198822	GRM3	7.45e-16	TRUE	<0.01
rs12076635;rs112361411;rs2428954;rs45605334;rs145155829;rs1198982;rs61768375;rs1362153;rs1999595;rs150833155	25	chr1:43629846-44497139	3.33e-34	ENSG00000066135	KDM4A	7.48e-16	FALSE	<0.01
rs324438	1	chr5:32354456-32444867	1.7e-06	ENSG00000056097	ZFR	8.06e-16	TRUE	<0.01
rs995698	1	chr9:88161455-88356944	1.53e-12	ENSG00000135049	AGTPBP1	8.91e-16	TRUE	<0.01
rs9608471	1	chr22:26565440-26779562	2.54e-06	ENSG00000100095	SEZ6L	9.77e-16	TRUE	<0.01
rs9545395;rs936496;rs185989636;rs17811799	3	chr13:35516424-36705467	3.81e-11	ENSG00000133083	DCLK1	1.01e-15	FALSE	<0.01
rs1671770;rs1718188;rs10774563;rs113473640	18	chr12:120881764-121623876	9.05e-12	ENSG00000157782	CABP1	1.04e-15	TRUE	<0.01
rs35417702;rs78193153;rs2867566;rs1548422;rs74998753	1	chr7:71244476-71912148	2.4e-27	ENSG00000183166	CALN1	1.12e-15	TRUE	<0.01
rs58779949;rs11231643	24	chr11:63606400-64139687	3.84e-09	ENSG00000167770	OTUB1	1.36e-15	FALSE	<0.01
rs11000785;rs10824045	10	chr10:75432880-75682535	1.32e-07	ENSG00000148660	CAMK2G	1.65e-15	FALSE	<0.01
rs78116078	1	chr1:18434240-18704977	3.33e-08	ENSG00000117154	IGSF21	1.71e-15	TRUE	<0.01
rs363096;rs362307;rs4690081;rs6853599;rs6824567;rs116069820	12	chr4:2794750-3451211	5.77e-24	ENSG00000159788	RGS12	1.75e-15	FALSE	<0.01
rs854796;rs113269212	17	chr17:17750139-18639432	4.66e-09	ENSG00000091542	ALKBH5	1.8e-15	TRUE	<0.01
rs2434672;rs31947;rs13182649;rs2561621	1	chr5:10971952-11904155	1.06e-10	ENSG00000169862	CTNND2	1.87e-15	TRUE	<0.01
rs708915	1	chr20:8112824-8949003	1.68e-07	ENSG00000182621	PLCB1	1.96e-15	TRUE	<0.01
rs9886703;rs4877516;rs7035315;rs11138664;rs62573823;rs7019624	1	chr9:82186688-82341658	4.46e-13	ENSG00000106829	TLE4	2.67e-15	TRUE	<0.01
rs4938083	1	chr11:110447766-110583912	1.42e-06	ENSG00000137727	ARHGAP20	2.8e-15	TRUE	<0.01
rs56139009;rs7916697	9	chr10:69865912-70454239	2.21e-06	ENSG00000179774	ATOH7	2.81e-15	TRUE	<0.01
rs2055940;rs4279178	2	chr4:46920917-47428461	4.95e-08	ENSG00000163288	GABRB1	3.02e-15	FALSE	<0.01
rs12789313;rs7109593;rs78627992	1	chr11:24518516-25104150	6.79e-11	ENSG00000187398	LUZP2	3.04e-15	TRUE	<0.01
rs10411759	2	chr19:1815245-1863564	2.88e-09	ENSG00000079313	REXO1	3.11e-15	FALSE	<0.01
rs913402	1	chr13:77618792-77901185	3.36e-06	ENSG00000005810	MYCBP2	3.17e-15	TRUE	<0.01
rs67004399	1	chr14:102228135-102394326	1.03e-06	ENSG00000078304	PPP2R5C	3.35e-15	TRUE	<0.01
rs4358081	6	chr2:28931819-29275096	1.28e-11	ENSG00000213639	PPP1CB	3.35e-15	FALSE	<0.01
rs117340654;rs642803;rs585557;rs76878669;rs35947684;rs118151305;rs10896139;rs116864252;rs4930188;rs35111506;rs72939178;rs479018;rs7127808;rs7120517;rs118011160;rs117309574	93	chr11:65029233-67407031	3.1e-17	ENSG00000175229	GAL3ST3	3.45e-15	FALSE	<0.01
rs59480703	1	chr8:9757574-9762876	3.97e-12	ENSG00000253230	-	3.5e-15	TRUE	<0.01
rs117340654;rs642803;rs585557;rs76878669;rs35947684;rs118151305;rs10896139;rs116864252;rs4930188;rs35111506;rs72939178;rs479018;rs7127808;rs7120517;rs118011160;rs117309574	93	chr11:65029233-67407031	3.1e-17	ENSG00000175115	PACS1	3.84e-15	FALSE	<0.01
rs6573559;rs6573552	11	chr14:64319683-65056098	3.11e-12	ENSG00000179841	AKAP5	3.94e-15	FALSE	<0.01
rs2657283	3	chr10:76854190-76995788	2.08e-09	ENSG00000156671	SAMD8	4.13e-15	FALSE	<0.01
rs17400325	2	chr2:178492797-178973081	8.27e-08	ENSG00000128655	PDE11A	4.2e-15	FALSE	<0.01
rs8024	3	chr1:201592411-201915716	1.13e-14	ENSG00000134369	NAV1	4.23e-15	FALSE	<0.01
rs2314338;rs118101047;rs507671;rs112199584	9	chr17:38278790-38613983	9.5e-09	ENSG00000188895	MSL1	4.63e-15	FALSE	<0.01
rs10249075	5	chr7:77166592-77586818	4.04e-06	ENSG00000187257	RSBN1L	4.87e-15	FALSE	<0.01
rs114352120	7	chr5:64813593-65167553	2.8e-07	ENSG00000113595	TRIM23	5.13e-15	FALSE	<0.01
rs732904	1	chr5:179660143-179719099	1.48e-06	ENSG00000050748	MAPK9	5.16e-15	TRUE	<0.01
rs2430808	3	chr8:22570769-22877712	8.43e-07	ENSG00000008853	RHOBTB2	5.27e-15	FALSE	<0.01
rs58779949;rs11231643	24	chr11:63606400-64139687	3.84e-09	ENSG00000126500	FLRT1	5.37e-15	FALSE	<0.01
rs2297293;rs9978480	2	chr21:47063608-47424964	8.8e-11	ENSG00000183570	PCBP3	5.5e-15	TRUE	<0.01
rs6531520	1	chr4:37245842-37451087	1.6e-06	ENSG00000174145	KIAA1239	5.61e-15	TRUE	<0.01
rs301793;rs11121155;rs11589090;rs66504733	2	chr1:8377886-8877702	1.44e-16	ENSG00000142599	RERE	5.98e-15	FALSE	<0.01
rs150831392	6	chr11:73357223-73681411	4.38e-06	ENSG00000175582	RAB6A	6.38e-15	FALSE	<0.01
rs11592299;rs3781339;rs12774577;rs10748841;rs76957677;rs2986016;rs1538205;rs146952142;rs138873813;rs3740409	22	chr10:104221149-105615301	8.69e-13	ENSG00000148798	INA	6.77e-15	FALSE	<0.01
rs2174528	1	chr5:24487209-24645087	8.39e-07	ENSG00000040731	CDH10	6.92e-15	TRUE	<0.01
rs74453875;rs62260764;rs11709573;rs9859556;rs3172494;rs74473238;rs144519232;rs55786114;rs2624818;rs71325001;rs34037363;rs55689339;rs141260127;rs112269639;rs11716398;rs190848966;rs55935606;rs62263033;rs116033001;rs77719387;rs140021702;rs6780575;rs3731507;rs116656374;rs62248598;rs182355396;rs1264194;rs73083140;rs113893318;rs116192940;rs138484388;rs736471;rs11720093;rs140269757;rs114182490;rs7308914…	107	chr3:46899362-52090566	4.61e-82	ENSG00000008300	CELSR3	8.07e-15	FALSE	<0.01
rs76246107	9	chr19:49977486-50161905	6.52e-10	ENSG00000126461	SCAF1	8.09e-15	FALSE	<0.01
rs9442750;rs146613518	1	chr6:72596406-73112845	3.15e-08	ENSG00000079841	RIMS1	8.1e-15	TRUE	<0.01
rs192436652;rs17516383	4	chr19:54926373-54984411	2.06e-12	ENSG00000167615	LENG8	9.12e-15	TRUE	<0.01
rs2545795	4	chr5:176830205-176901402	1.03e-18	ENSG00000131188	PRR7	1.04e-14	FALSE	<0.01
rs2316182	2	chr9:91628060-91793682	7.88e-07	ENSG00000148082	SHC3	1.06e-14	TRUE	<0.01
rs74453875;rs62260764;rs11709573;rs9859556;rs3172494;rs74473238;rs144519232;rs55786114;rs2624818;rs71325001;rs34037363;rs55689339;rs141260127;rs112269639;rs11716398;rs190848966;rs55935606;rs62263033;rs116033001;rs77719387;rs140021702;rs6780575;rs3731507;rs116656374;rs62248598;rs182355396;rs1264194;rs73083140;rs113893318;rs116192940;rs138484388;rs736471;rs11720093;rs140269757;rs114182490;rs7308914…	107	chr3:46899362-52090566	4.61e-82	ENSG00000090097	PCBP4	1.06e-14	FALSE	<0.01
rs74415461;rs118124826;rs35754755;rs4785577;rs9673820;rs9932312;rs12917772;rs8047204	26	chr16:89154783-90142338	6.25e-12	ENSG00000167522	ANKRD11	1.24e-14	FALSE	<0.01
rs1054442;rs80257979;rs11168951;rs11168828	15	chr12:49297286-49692465	1.1e-20	ENSG00000181418	DDN	1.33e-14	TRUE	<0.01
rs165633;rs145974062	6	chr22:29833006-30094587	1.27e-12	ENSG00000225465	RFPL1-AS1	1.63e-14	FALSE	<0.01
rs8009933	4	chr14:39501123-39652422	4.72e-09	ENSG00000182400	TRAPPC6B	1.82e-14	FALSE	<0.01
rs12212126	1	chr6:165740776-166075588	4.58e-06	ENSG00000112541	PDE10A	1.84e-14	TRUE	<0.01
rs7623169;rs6550896;rs826380	2	chr3:24137760-24536773	3.1e-07	ENSG00000151090	THRB	1.87e-14	TRUE	<0.01
rs66568921;rs56262138;rs9830359;rs17026843;rs1003986;rs75841665;rs34859143;rs111793972;rs4456862	2	chr3:85008132-86117944	7.6e-34	ENSG00000175161	CADM2	1.88e-14	TRUE	<0.01
rs11749676	1	chr5:174867675-174871163	2.64e-06	ENSG00000184845	DRD1	1.94e-14	TRUE	<0.01
rs178183;rs78009242	1	chr14:26912299-27066960	4.81e-19	ENSG00000139910	NOVA1	1.94e-14	TRUE	<0.01
rs7311746	1	chr12:861759-1020618	2.33e-06	ENSG00000060237	WNK1	2.07e-14	TRUE	<0.01
rs7167688	1	chr15:26788693-27184686	1.71e-11	ENSG00000166206	GABRB3	2.98e-14	FALSE	<0.01
rs17113730	1	chr12:74931551-74935223	4.1e-10	ENSG00000253719	ATXN7L3B	3.07e-14	TRUE	<0.01
rs17170519;rs12701263	2	chr7:32535038-33078516	1.99e-08	ENSG00000105778	AVL9	3.33e-14	FALSE	<0.01
rs8042593	6	chr15:66585555-66858302	5.82e-07	ENSG00000169032	MAP2K1	3.38e-14	FALSE	<0.01
rs7029718;rs1329044;rs117273411;rs2805064;rs12345568;rs13284516;rs4977885;rs73457936;rs79420284;rs10966166;rs72700034;rs117349657;rs143773936;rs11787746;rs184795764;rs10119773;rs117494884	1	chr9:23690102-23826335	7.82e-65	ENSG00000107105	ELAVL2	3.95e-14	TRUE	<0.01
rs351880;rs61746505	1	chr20:62783144-62873604	9.38e-08	ENSG00000196132	MYT1	4.07e-14	FALSE	<0.01
rs9371883;rs12660494;rs9397782;rs71575023	4	chr6:155153831-155635627	3.42e-09	ENSG00000146426	TIAM2	4.21e-14	FALSE	<0.01
rs580652	1	chr11:83166055-85338966	4.65e-10	ENSG00000150672	DLG2	4.41e-14	TRUE	<0.01
rs12076635;rs112361411;rs2428954;rs45605334;rs145155829;rs1198982;rs61768375;rs1362153;rs1999595;rs150833155	25	chr1:43629846-44497139	3.33e-34	ENSG00000117411	B4GALT2	4.53e-14	TRUE	<0.01
rs6575340	3	chr14:93703896-94174222	7.1e-08	ENSG00000133958	UNC79	4.54e-14	FALSE	<0.01
rs2406253;rs10241492;rs4134932	17	chr7:99699172-100092422	3.58e-14	ENSG00000146826	C7orf43	4.66e-14	FALSE	<0.01
rs4894658	1	chr3:173114074-174004434	1.34e-08	ENSG00000169760	NLGN1	5.08e-14	FALSE	<0.01
rs71529384	1	chr7:5314000-5343696	1.27e-07	ENSG00000164638	SLC29A4	5.18e-14	TRUE	<0.01
rs9899056	2	chr17:48172101-48207246	2.01e-06	ENSG00000167100	SAMD14	5.31e-14	FALSE	<0.01
rs12619019;rs138094079;rs11690765	5	chr2:202937978-203634480	1.1e-07	ENSG00000138439	FAM117B	5.44e-14	TRUE	<0.01
rs117340654;rs642803;rs585557;rs76878669;rs35947684;rs118151305;rs10896139;rs116864252;rs4930188;rs35111506;rs72939178;rs479018;rs7127808;rs7120517;rs118011160;rs117309574	93	chr11:65029233-67407031	3.1e-17	ENSG00000251562	MALAT1	5.55e-14	FALSE	<0.01
rs3817923;rs17278379	3	chr1:171810621-172437971	4.11e-08	ENSG00000197959	DNM3	5.7e-14	TRUE	<0.01
rs2416759;rs10984798	3	chr9:123363091-123605229	1.45e-09	ENSG00000106780	MEGF9	5.94e-14	FALSE	<0.01
rs74453875;rs62260764;rs11709573;rs9859556;rs3172494;rs74473238;rs144519232;rs55786114;rs2624818;rs71325001;rs34037363;rs55689339;rs141260127;rs112269639;rs11716398;rs190848966;rs55935606;rs62263033;rs116033001;rs77719387;rs140021702;rs6780575;rs3731507;rs116656374;rs62248598;rs182355396;rs1264194;rs73083140;rs113893318;rs116192940;rs138484388;rs736471;rs11720093;rs140269757;rs114182490;rs7308914…	107	chr3:46899362-52090566	4.61e-82	ENSG00000114646	CSPG5	6e-14	TRUE	<0.01
rs12461072	6	chr19:18208603-18359010	8.98e-07	ENSG00000099308	MAST3	6.65e-14	FALSE	<0.01
rs6729612	1	chr2:152689290-152955593	9.39e-10	ENSG00000182389	CACNB4	7.08e-14	FALSE	<0.01
rs118093058;rs117862461;rs4034	31	chr11:62201016-63177766	3.78e-12	ENSG00000168539	CHRM1	7.37e-14	FALSE	<0.01
rs9611597;rs9607859;rs4822112;rs148537066;rs2899355;rs2142695	35	chr22:41165634-42828401	2.3e-08	ENSG00000183864	TOB2	8.13e-14	FALSE	<0.01
rs173768;rs6881515	2	chr5:160715436-161129599	1.34e-07	ENSG00000145864	GABRB2	8.18e-14	FALSE	<0.01
rs10742591;rs10444280;rs140608214	1	chr11:40135753-41481323	4.26e-09	ENSG00000148948	LRRC4C	9.96e-14	TRUE	<0.01
rs6060001	12	chr20:32951041-33680674	7.47e-07	ENSG00000131067	GGT7	1.06e-13	FALSE	<0.01
rs1861786;rs1019385	1	chr12:13714144-14133053	2.39e-08	ENSG00000150086	GRIN2B	1.08e-13	TRUE	<0.01
rs9595885	4	chr13:32974861-33352157	7.58e-07	ENSG00000083642	PDS5B	1.13e-13	TRUE	<0.01
rs17186106;rs2870281;rs7655515;rs12331072;rs11735195	2	chr4:90800683-92523064	3.95e-09	ENSG00000184305	FAM190A	1.27e-13	TRUE	<0.01
rs1154780	1	chr7:77646393-79082890	5.73e-07	ENSG00000187391	MAGI2	1.29e-13	FALSE	<0.01
rs117340654;rs642803;rs585557;rs76878669;rs35947684;rs118151305;rs10896139;rs116864252;rs4930188;rs35111506;rs72939178;rs479018;rs7127808;rs7120517;rs118011160;rs117309574	93	chr11:65029233-67407031	3.1e-17	ENSG00000173898	SPTBN2	1.36e-13	FALSE	<0.01
rs6060001	12	chr20:32951041-33680674	7.47e-07	ENSG00000198646	NCOA6	1.41e-13	FALSE	<0.01
rs12407640	1	chr1:239549865-240078750	7.32e-07	ENSG00000133019	CHRM3	1.43e-13	TRUE	<0.01
rs11869798	2	chr17:80477589-80606411	3.84e-06	ENSG00000141568	FOXK2	1.56e-13	FALSE	<0.01
rs6697584;rs75500877;rs3766979;rs3845446	1	chr1:181382238-181777219	1.43e-13	ENSG00000198216	CACNA1E	1.63e-13	TRUE	<0.01
rs2303929;rs55813292	9	chr7:150642049-150841523	1.34e-07	ENSG00000164885	CDK5	1.77e-13	TRUE	<0.01
rs5750200	1	chr22:36134783-36424473	6.99e-06	ENSG00000100320	RBFOX2	1.86e-13	TRUE	<0.01
rs9888796;rs62059344;rs255053;rs111965666;rs3868142	51	chr16:67143915-68601039	1.2e-12	ENSG00000039523	FAM65A	1.89e-13	FALSE	<0.01
rs10761202;rs111370527	4	chr9:95947198-96328397	4.28e-10	ENSG00000048828	FAM120A	1.97e-13	FALSE	<0.01
rs13275199;rs73693135	9	chr8:67579831-68658620	6.2e-07	ENSG00000066777	ARFGEF1	2.04e-13	FALSE	<0.01
rs2795023	2	chr20:11871371-11907257	5.67e-06	ENSG00000132640	BTBD3	2.2e-13	TRUE	<0.01
rs7775100	1	chr6:96463860-96653420	1.2e-09	ENSG00000172461	FUT9	2.27e-13	TRUE	<0.01
rs11780023;rs2977464	2	chr8:141541264-142012315	1.17e-09	ENSG00000169398	PTK2	2.27e-13	TRUE	<0.01
rs9375403;rs9375188;rs1338554;rs56231335;rs6932108;rs62420387;rs17813721;rs185063430;rs11968507;rs2211058;rs4521599;rs117047767	2	chr6:98150157-99286660	8.78e-52	ENSG00000184486	POU3F2	2.29e-13	TRUE	<0.01
rs2149866;rs9557834	2	chr13:102375035-103054799	1.35e-07	ENSG00000102466	FGF14	2.3e-13	TRUE	<0.01
rs164938;rs1719571;rs115923660	6	chr3:10289707-10749716	1.05e-09	ENSG00000157087	ATP2B2	2.31e-13	TRUE	<0.01
rs12473986;rs711793;rs10193498;rs13025467;rs2676507;rs7583613;rs72897145;rs12620774	3	chr2:173600002-174146764	5.01e-12	ENSG00000091428	RAPGEF4	2.46e-13	FALSE	<0.01
rs12638072;rs77554090;rs1404549;rs6445489;rs78249472;rs75846417	1	chr3:65342053-66024509	3.13e-12	ENSG00000151276	MAGI1	2.51e-13	FALSE	<0.01
rs9649	4	chr17:33897849-34070540	6.13e-09	ENSG00000006125	AP2B1	3e-13	FALSE	<0.01
rs6977237;rs11971750;rs35556294;rs11763885;rs35638429;rs12699616;rs12699610;rs17590791;rs7788935	2	chr7:13930853-15014402	5.59e-09	ENSG00000006468	ETV1	3.09e-13	TRUE	<0.01
rs4984682	16	chr16:616995-818865	1.82e-16	ENSG00000197562	RAB40C	3.23e-13	FALSE	<0.01
rs6774002	1	chr3:123798870-124440036	4.64e-07	ENSG00000160145	KALRN	3.59e-13	TRUE	<0.01
rs77510794	2	chr1:42628362-42801548	2.45e-06	ENSG00000198815	FOXJ3	3.69e-13	FALSE	<0.01
rs9347382;rs4709383	2	chr6:160327974-160534539	7.15e-07	ENSG00000130368	MAS1	3.79e-13	TRUE	<0.01
rs9912317	4	chr17:7788124-7835317	9.92e-06	ENSG00000170004	CHD3	4.09e-13	FALSE	<0.01
rs864899	7	chr12:50569571-51326300	9.83e-08	ENSG00000066084	DIP2B	4.17e-13	FALSE	<0.01
rs62109862;rs3786712;rs56160517	14	chr19:12873817-13068050	2.85e-11	ENSG00000105613	MAST1	4.24e-13	FALSE	<0.01
rs35550545;rs188415602;rs12718416;rs192569608;rs144581493	33	chr1:149900543-151098018	1.04e-07	ENSG00000213190	MLLT11	4.59e-13	FALSE	<0.01
rs2212430;rs2852106	1	chr11:109292846-109299840	1.32e-10	ENSG00000185742	C11orf87	4.69e-13	TRUE	<0.01
rs56391344;rs72730738;rs62007827;rs28558809;rs4254287	2	chr15:77905369-78081016	7.49e-20	ENSG00000169783	LINGO1	4.7e-13	TRUE	<0.01
rs9933256;rs2050115	1	chr16:1203241-1271771	6.06e-17	ENSG00000196557	CACNA1H	5.59e-13	FALSE	<0.01
rs12665999	2	chr7:116312248-116559315	4.08e-07	ENSG00000198898	CAPZA2	5.61e-13	FALSE	<0.01
rs28513882;rs609777	1	chr3:107241783-107530171	2.03e-09	ENSG00000114439	BBX	5.89e-13	TRUE	<0.01
rs6690939	1	chr1:40144320-40157361	3.72e-06	ENSG00000116983	HPCAL4	6.35e-13	TRUE	<0.01
rs12817428;rs12313886	1	chr12:119419300-119600856	5.64e-06	ENSG00000139767	SRRM4	6.64e-13	TRUE	<0.01
rs2406253;rs10241492;rs4134932	17	chr7:99699172-100092422	3.58e-14	ENSG00000166924	C7orf51	7.19e-13	FALSE	<0.01
rs9912317	4	chr17:7788124-7835317	9.92e-06	ENSG00000170049	KCNAB3	7.27e-13	FALSE	<0.01
rs1413275	1	chr13:88324870-88331868	5.88e-06	ENSG00000165300	SLITRK5	7.51e-13	TRUE	<0.01
rs17411339;rs2043187;rs2298656;rs1671269;rs141586924;rs1502219;rs79162241;rs12959714;rs117027853;rs3964628	6	chr18:49867158-51908404	5.1e-23	ENSG00000187323	DCC	7.61e-13	TRUE	<0.01
rs2072927	6	chr1:1656277-1935276	1.48e-06	ENSG00000215790	SLC35E2	7.87e-13	TRUE	<0.01
rs12746551;rs1418609;rs141196516	5	chr1:113933371-114430169	1.44e-09	ENSG00000081019	RSBN1	8.89e-13	TRUE	<0.01
rs7591985	1	chr2:65454887-65498387	2.69e-06	ENSG00000138071	ACTR2	8.95e-13	TRUE	<0.01
rs16531	1	chr17:37329709-37353902	5.62e-08	ENSG00000067191	CACNB1	9.01e-13	TRUE	<0.01
rs6977237;rs11971750;rs35556294;rs11763885;rs35638429;rs12699616;rs12699610;rs17590791;rs7788935	2	chr7:13930853-15014402	5.59e-09	ENSG00000136267	DGKB	1.04e-12	TRUE	<0.01
rs9611597;rs9607859;rs4822112;rs148537066;rs2899355;rs2142695	35	chr22:41165634-42828401	2.3e-08	ENSG00000100393	EP300	1.07e-12	FALSE	<0.01
rs12591647	6	chr15:65673802-66084631	7.78e-17	ENSG00000074603	DPP8	1.13e-12	FALSE	<0.01
rs12953422;rs72953382;rs11081851	2	chr18:31158541-31803515	1.89e-08	ENSG00000101746	NOL4	1.17e-12	TRUE	<0.01
rs61993073;rs435802;rs17753885;rs79347652;rs4899737;rs61978300	1	chr14:78708734-80330762	7.92e-07	ENSG00000021645	NRXN3	1.19e-12	TRUE	<0.01
rs10984445;rs1009470;rs7869075;rs12553064;rs110797;rs3758338;rs17580614	1	chr9:121915736-122131745	2.58e-16	ENSG00000078725	DBC1	1.24e-12	TRUE	<0.01
rs7460106;rs144336753;rs77702622;rs902820;rs4976954;rs13274119;rs11775314;rs118083122;rs9324592;rs4130074	3	chr8:143279717-143626370	2.06e-13	ENSG00000181790	BAI1	1.28e-12	TRUE	<0.01
rs2718277;rs7810710	2	chr7:73868120-74175026	2.99e-08	ENSG00000077809	GTF2I	1.3e-12	TRUE	<0.01
rs728054;rs322349;rs10253968	3	chr7:136912088-137531838	2.34e-18	ENSG00000157680	DGKI	1.33e-12	FALSE	<0.01
rs9927137	11	chr16:30583571-30905623	5.11e-09	ENSG00000080603	SRCAP	1.47e-12	FALSE	<0.01
rs35550545;rs188415602;rs12718416;rs192569608;rs144581493	33	chr1:149900543-151098018	1.04e-07	ENSG00000163125	RPRD2	1.48e-12	FALSE	<0.01
rs118093058;rs117862461;rs4034	31	chr11:62201016-63177766	3.78e-12	ENSG00000162188	GNG3	1.48e-12	TRUE	<0.01
rs72990858	1	chr6:105175968-105307794	1e-07	ENSG00000085382	HACE1	1.69e-12	TRUE	<0.01
rs1054442;rs80257979;rs11168951;rs11168828	15	chr12:49297286-49692465	1.1e-20	ENSG00000167548	MLL2	1.85e-12	FALSE	<0.01
rs35493937	1	chr2:65537985-65659771	9.73e-14	ENSG00000198369	SPRED2	1.9e-12	TRUE	<0.01
rs8008382	3	chr14:103995521-104167888	4.07e-12	ENSG00000126214	KLC1	1.95e-12	FALSE	<0.01
rs2024568	3	chr20:44650329-44758502	1.61e-09	ENSG00000124140	SLC12A5	1.96e-12	FALSE	<0.01
rs9903071;rs34400969	4	chr17:3822869-4167274	3.37e-07	ENSG00000074755	ZZEF1	1.96e-12	FALSE	<0.01
rs11174399;rs1146079;rs11173930	4	chr12:62102040-62991363	2.42e-10	ENSG00000198673	FAM19A2	2e-12	FALSE	<0.01
rs62367470;rs9687260	1	chr5:45259349-45696253	3.34e-07	ENSG00000164588	HCN1	2.34e-12	TRUE	<0.01
rs743316;rs61739710;rs2834287	8	chr21:34757299-35272165	8.21e-11	ENSG00000205726	ITSN1	2.38e-12	FALSE	<0.01
rs68145588;rs1001168	1	chr17:76000249-76104916	7.53e-10	ENSG00000078687	TNRC6C	2.62e-12	TRUE	<0.01
rs150537577;rs62294077	3	chr4:699537-819986	9.5e-09	ENSG00000168993	CPLX1	2.72e-12	FALSE	<0.01
rs770381;rs79644175	3	chr13:50570024-51298199	7.25e-07	ENSG00000231607	DLEU2	2.9e-12	FALSE	<0.01
rs74415461;rs118124826;rs35754755;rs4785577;rs9673820;rs9932312;rs12917772;rs8047204	26	chr16:89154783-90142338	6.25e-12	ENSG00000003249	DBNDD1	2.93e-12	FALSE	<0.01
rs28512462	1	chr16:24741016-24837548	9.77e-15	ENSG00000090905	TNRC6A	3.04e-12	TRUE	<0.01
rs610382	3	chr11:133938820-134117686	1.94e-06	ENSG00000151502	VPS26B	3.08e-12	TRUE	<0.01
rs3751331;rs138569349;rs1148547	20	chr12:57984957-58351052	1.75e-11	ENSG00000135439	AGAP2	3.29e-12	FALSE	<0.01
rs785499	8	chr1:46049518-46642160	2.02e-07	ENSG00000159592	GPBP1L1	3.3e-12	FALSE	<0.01
rs10496091;rs116386746;rs28551472;rs56949301;rs145281763;rs11693744	9	chr2:60983365-61765761	3.71e-17	ENSG00000162929	KIAA1841	3.34e-12	FALSE	<0.01
rs1335482;rs12754946;rs2647504;rs114020893	10	chr1:77747736-78835149	1.01e-11	ENSG00000154027	AK5	3.62e-12	TRUE	<0.01
rs72944064;rs12969389	1	chr18:63417488-63552376	9.39e-10	ENSG00000081138	CDH7	4.17e-12	TRUE	<0.01
rs6881581	10	chr5:140710252-140998622	1.08e-10	ENSG00000240184	PCDHGC3	4.25e-12	FALSE	<0.01
rs12123293	1	chr1:210856555-211307457	4.48e-09	ENSG00000143473	KCNH1	4.28e-12	TRUE	<0.01
rs35751693;rs13034349;rs35836525;rs11692435	9	chr2:97541620-98612388	8.04e-10	ENSG00000075568	TMEM131	4.39e-12	FALSE	<0.01
rs17604349;rs62051146;rs17668674;rs35999374;rs9927049;rs138696382;rs34113301;rs62055046	21	chr16:70721342-72210777	2.36e-12	ENSG00000040199	PHLPP2	4.42e-12	FALSE	<0.01
rs5765717	1	chr22:44888452-44894178	1.37e-07	ENSG00000188636	LDOC1L	4.55e-12	TRUE	<0.01
rs61104616;rs324885;rs193706;rs141729694;rs72771860;rs16903468;rs2365376;rs56324019;rs115732298;rs79486459;rs16903288;rs28582119;rs10474278	8	chr5:87485450-88762215	1.56e-34	ENSG00000245526	LINC00461	4.65e-12	TRUE	<0.01
rs12468040;rs72792395;rs163229;rs4952728;rs698819	5	chr2:44502599-45173216	3.12e-21	ENSG00000138078	PREPL	4.66e-12	FALSE	<0.01
rs9929993;rs12709186;rs11644446;rs4787028;rs11076962;rs74889647;rs7200163;rs1476977;rs2078357	1	chr16:6069095-7763340	3.18e-12	ENSG00000078328	RBFOX1	4.93e-12	TRUE	<0.01
rs112603734;rs617380;rs78580713	1	chr6:5998232-6007200	2.72e-09	ENSG00000124785	NRN1	5.25e-12	TRUE	<0.01
rs75868942	1	chr3:55542336-56502391	4.86e-06	ENSG00000187672	ERC2	5.51e-12	TRUE	<0.01
rs4558451	1	chr17:9813926-10101868	1.21e-06	ENSG00000007237	GAS7	5.51e-12	TRUE	<0.01
rs61855292	1	chr10:61788159-62493248	4.59e-07	ENSG00000151150	ANK3	5.75e-12	TRUE	<0.01
rs11971332;rs10951590;rs13246220;rs113205706;rs10268735;rs35787907;rs78118326;rs886765	8	chr7:39017598-40900362	3.62e-13	ENSG00000065883	CDK13	5.84e-12	FALSE	<0.01
rs307913	1	chr19:54412589-54447195	2.44e-06	ENSG00000105605	CACNG7	5.85e-12	FALSE	<0.01
rs6994287;rs35847492	1	chr8:9413424-9639856	1.11e-12	ENSG00000173273	TNKS	5.97e-12	TRUE	<0.01
rs8085914	1	chr18:72342919-72777628	5.8e-06	ENSG00000215421	ZNF407	6e-12	TRUE	<0.01
rs6969783	1	chr7:117350705-117514193	2.87e-12	ENSG00000077063	CTTNBP2	6.01e-12	TRUE	<0.01
rs1671770;rs1718188;rs10774563;rs113473640	18	chr12:120881764-121623876	9.05e-12	ENSG00000157837	-	6.35e-12	TRUE	<0.01
rs10943588;rs12193597	2	chr6:79577189-79787953	1.05e-08	ENSG00000146247	PHIP	6.47e-12	FALSE	<0.01
rs2368831	1	chr12:175931-287626	1.63e-10	ENSG00000120645	IQSEC3	6.58e-12	TRUE	<0.01
rs2061425	3	chr15:51633826-52013223	2.02e-07	ENSG00000104112	SCG3	6.63e-12	FALSE	<0.01
rs17598675;rs62340636;rs62334820;rs62336057;rs12504803	2	chr4:176554085-176923815	1.37e-16	ENSG00000150625	GPM6A	6.69e-12	TRUE	<0.01
rs11138947	2	chr9:72043164-72287222	2.36e-11	ENSG00000243888	-	6.75e-12	TRUE	<0.01
rs9926649;rs8061964;rs3785092	17	chr16:66460816-66978999	1.58e-08	ENSG00000135720	DYNC1LI2	6.76e-12	TRUE	<0.01
rs62119828	1	chr19:2511218-2702746	6.12e-08	ENSG00000176533	GNG7	6.91e-12	TRUE	<0.01
rs767943;rs59327961;rs2179403	1	chr6:24126350-24156424	1.54e-14	ENSG00000152954	NRSN1	7.64e-12	TRUE	<0.01
rs28505285;rs12535503	2	chr7:44421969-44580914	3.5e-09	ENSG00000015676	NUDCD3	7.91e-12	FALSE	<0.01
rs11014447	1	chr10:25463991-25891155	2.34e-06	ENSG00000151025	GPR158	7.95e-12	TRUE	<0.01
rs4868222	1	chr5:172261278-172379688	3.35e-06	ENSG00000113719	ERGIC1	8.51e-12	TRUE	<0.01
rs7931563;rs628993	2	chr11:61447905-61555990	5.15e-14	ENSG00000134780	DAGLA	8.79e-12	TRUE	<0.01
rs74453875;rs62260764;rs11709573;rs9859556;rs3172494;rs74473238;rs144519232;rs55786114;rs2624818;rs71325001;rs34037363;rs55689339;rs141260127;rs112269639;rs11716398;rs190848966;rs55935606;rs62263033;rs116033001;rs77719387;rs140021702;rs6780575;rs3731507;rs116656374;rs62248598;rs182355396;rs1264194;rs73083140;rs113893318;rs116192940;rs138484388;rs736471;rs11720093;rs140269757;rs114182490;rs7308914…	107	chr3:46899362-52090566	4.61e-82	ENSG00000198218	QRICH1	9.04e-12	FALSE	<0.01
rs34316274	3	chr16:903638-1036979	3.86e-09	ENSG00000223796	-	9.25e-12	FALSE	<0.01
rs2436760;rs9471333;rs10947878;rs62395891;rs9471342	2	chr6:40302693-40555204	4.52e-08	ENSG00000156564	LRFN2	9.26e-12	FALSE	<0.01
rs828867	1	chr2:74229840-74329698	1.39e-07	ENSG00000187605	TET3	1.07e-11	FALSE	<0.01
rs151257075;rs16837272	17	chr1:156182773-156647189	7.96e-06	ENSG00000125462	C1orf61	1.07e-11	FALSE	<0.01
rs4793090	11	chr17:40554468-40829048	1.67e-08	ENSG00000037042	TUBG2	1.12e-11	FALSE	<0.01
rs74453875;rs62260764;rs11709573;rs9859556;rs3172494;rs74473238;rs144519232;rs55786114;rs2624818;rs71325001;rs34037363;rs55689339;rs141260127;rs112269639;rs11716398;rs190848966;rs55935606;rs62263033;rs116033001;rs77719387;rs140021702;rs6780575;rs3731507;rs116656374;rs62248598;rs182355396;rs1264194;rs73083140;rs113893318;rs116192940;rs138484388;rs736471;rs11720093;rs140269757;rs114182490;rs7308914…	107	chr3:46899362-52090566	4.61e-82	ENSG00000164082	GRM2	1.14e-11	TRUE	<0.01
rs7972246;rs71452042;rs73091149	6	chr12:27091316-27576241	1.01e-13	ENSG00000247903	-	1.21e-11	FALSE	<0.01
rs13425585;rs1368250;rs1432578	1	chr2:157291802-157470247	2.32e-10	ENSG00000115159	GPD2	1.29e-11	TRUE	<0.01
rs74453875;rs62260764;rs11709573;rs9859556;rs3172494;rs74473238;rs144519232;rs55786114;rs2624818;rs71325001;rs34037363;rs55689339;rs141260127;rs112269639;rs11716398;rs190848966;rs55935606;rs62263033;rs116033001;rs77719387;rs140021702;rs6780575;rs3731507;rs116656374;rs62248598;rs182355396;rs1264194;rs73083140;rs113893318;rs116192940;rs138484388;rs736471;rs11720093;rs140269757;rs114182490;rs7308914…	107	chr3:46899362-52090566	4.61e-82	ENSG00000213672	NCKIPSD	1.31e-11	TRUE	<0.01
rs137950664	1	chr2:175664091-175870097	1.28e-07	ENSG00000128656	CHN1	1.33e-11	TRUE	<0.01
rs13327482;rs45453796;rs9820023	1	chr3:196769431-197026171	4.47e-11	ENSG00000075711	DLG1	1.33e-11	FALSE	<0.01
rs72737127	5	chr9:34457412-34620515	2.58e-06	ENSG00000122756	CNTFR	1.35e-11	FALSE	<0.01
rs78393250	14	chr11:47376411-48192393	1.79e-06	ENSG00000172247	C1QTNF4	1.39e-11	FALSE	<0.01
rs7542025	1	chr1:41086351-41131329	2.03e-06	ENSG00000117016	RIMS3	1.5e-11	TRUE	<0.01
rs11154134	1	chr6:123317116-123385612	5.32e-07	ENSG00000146352	CLVS2	1.55e-11	TRUE	<0.01
rs6560690;rs10870290	2	chr10:134020994-134195010	1.33e-06	ENSG00000165752	STK32C	1.56e-11	TRUE	<0.01
rs55736314;rs11919835;rs62244881;rs67000219;rs11128212;rs832220	3	chr3:71003844-71633140	4.59e-27	ENSG00000114861	FOXP1	1.58e-11	FALSE	<0.01
rs3734960	1	chr7:153584182-154685995	4.82e-06	ENSG00000130226	DPP6	1.65e-11	FALSE	<0.01
rs1054442;rs80257979;rs11168951;rs11168828	15	chr12:49297286-49692465	1.1e-20	ENSG00000167552	TUBA1A	1.75e-11	FALSE	<0.01
rs11732160;rs74944857;rs10019169;rs7665356	2	chr4:66185281-66563747	1.46e-11	ENSG00000145242	EPHA5	1.78e-11	TRUE	<0.01
rs13381557;rs60225156;rs2668767;rs76952457	6	chr18:44259081-44702745	7.4e-10	ENSG00000101638	ST8SIA5	1.88e-11	TRUE	<0.01
rs7617204;rs9883579	4	chr3:160473390-161090668	4.33e-12	ENSG00000163590	PPM1L	2.02e-11	FALSE	<0.01
rs12409811;rs61804837	10	chr1:153777201-154243986	1.1e-07	ENSG00000143614	GATAD2B	2.03e-11	TRUE	<0.01
rs72946156	1	chr6:73331520-73908574	4.91e-06	ENSG00000185760	KCNQ5	2.03e-11	TRUE	<0.01
rs71384871;rs17625895;rs60456602;rs8049649	1	chr16:25703347-26149009	5.9e-07	ENSG00000182601	HS3ST4	2.04e-11	TRUE	<0.01
rs4512319	4	chr7:91570181-92030698	2.13e-07	ENSG00000001629	ANKIB1	2.4e-11	FALSE	<0.01
rs117340654;rs642803;rs585557;rs76878669;rs35947684;rs118151305;rs10896139;rs116864252;rs4930188;rs35111506;rs72939178;rs479018;rs7127808;rs7120517;rs118011160;rs117309574	93	chr11:65029233-67407031	3.1e-17	ENSG00000172803	SNX32	2.52e-11	FALSE	<0.01
rs11021131	1	chr11:88237744-88799113	1.95e-06	ENSG00000168959	GRM5	2.61e-11	TRUE	<0.01
rs7299842;rs11043298;rs10773208;rs12810587;rs78440611;rs11058322;rs10773002;rs34436758;rs10773515;rs12811983;rs112365238;rs61955089;rs146898200	26	chr12:122457328-124083116	2.5e-30	ENSG00000139722	VPS37B	2.63e-11	TRUE	<0.01
rs8078137	2	chr17:42449550-42580802	4.44e-06	ENSG00000186566	GPATCH8	2.79e-11	FALSE	<0.01
rs173768;rs6881515	2	chr5:160715436-161129599	1.34e-07	ENSG00000145863	GABRA6	2.84e-11	TRUE	<0.01
rs10493907	2	chr1:99355806-99614408	1.24e-07	ENSG00000117598	-	2.94e-11	TRUE	<0.01
rs987773;rs13216468	2	chr6:99321334-99797938	1.08e-07	ENSG00000146267	C6orf168	2.99e-11	TRUE	<0.01
rs4669654	1	chr2:11052063-11054350	3.95e-06	ENSG00000162975	KCNF1	3.08e-11	TRUE	<0.01
rs12446456	4	chr16:4846969-4987136	7.96e-06	ENSG00000140632	GLYR1	3.15e-11	FALSE	<0.01
rs743316;rs61739710;rs2834287	8	chr21:34757299-35272165	8.21e-11	ENSG00000205758	CRYZL1	3.29e-11	FALSE	<0.01
rs17248751;rs9929556;rs143812851;rs35754740;rs16966161;rs16962845;rs17427451;rs16962342;rs57899322;rs72790642	1	chr16:61685917-62070739	1.28e-15	ENSG00000150394	CDH8	3.29e-11	TRUE	<0.01
rs17604349;rs62051146;rs17668674;rs35999374;rs9927049;rs138696382;rs34113301;rs62055046	21	chr16:70721342-72210777	2.36e-12	ENSG00000102984	ZNF821	3.48e-11	FALSE	<0.01
rs13018640;rs71413877;rs72819118;rs192225848;rs72821189;rs10166286;rs10168615;rs17023131;rs79430745;rs6715321;rs4851263;rs4851338;rs13009915;rs1346620;rs77826402;rs62147651;rs62156361;rs6733011;rs11690621;rs116398129;rs111377325;rs11690494;rs744145	19	chr2:99061317-101034118	1.05e-50	ENSG00000040933	INPP4A	3.94e-11	FALSE	<0.01
rs7223311;rs2289762	2	chr17:78518619-78945013	1.77e-08	ENSG00000141564	RPTOR	4.03e-11	FALSE	<0.01
rs74415461;rs118124826;rs35754755;rs4785577;rs9673820;rs9932312;rs12917772;rs8047204	26	chr16:89154783-90142338	6.25e-12	ENSG00000141002	TCF25	4.27e-11	FALSE	<0.01
rs6065080;rs6061619;rs4810231;rs6062182	1	chr20:59827559-60512307	7.49e-19	ENSG00000179242	CDH4	4.28e-11	TRUE	<0.01
rs7299842;rs11043298;rs10773208;rs12810587;rs78440611;rs11058322;rs10773002;rs34436758;rs10773515;rs12811983;rs112365238;rs61955089;rs146898200	26	chr12:122457328-124083116	2.5e-30	ENSG00000183955	SETD8	4.32e-11	FALSE	<0.01
rs334110	1	chr2:179059208-179264160	2.21e-06	ENSG00000079156	OSBPL6	4.55e-11	TRUE	<0.01
rs34305371;rs2568955;rs1486108;rs12143094;rs72677177;rs481940;rs12028229;rs1445591;rs114030538;rs11209767;rs75977774;rs782231	4	chr1:71318036-72748417	1.1e-39	ENSG00000172260	NEGR1	4.7e-11	TRUE	<0.01
rs1817452	1	chr18:32073254-32471808	1.59e-06	ENSG00000134769	DTNA	4.71e-11	FALSE	<0.01
rs12602286;rs11656071	9	chr17:18853989-19290553	4.62e-14	ENSG00000072134	EPN2	4.91e-11	FALSE	<0.01
rs11000785;rs10824045	10	chr10:75432880-75682535	1.32e-07	ENSG00000214655	KIAA0913	5.2e-11	FALSE	<0.01
rs12477385;rs10184275;rs79337536;rs13035589;rs729869	3	chr2:166095912-166651192	7.15e-11	ENSG00000136531	SCN2A	5.28e-11	TRUE	<0.01
rs141502961	2	chr16:15489611-15682116	1.57e-08	ENSG00000166780	C16orf45	5.44e-11	FALSE	<0.01
rs8040116	6	chr15:49280673-50149346	9.45e-06	ENSG00000138593	SECISBP2L	5.57e-11	FALSE	<0.01
rs12736382	4	chr1:183441351-183897666	5.33e-08	ENSG00000116698	SMG7	5.62e-11	FALSE	<0.01
rs3768480	3	chr1:110527308-110613234	8.4e-13	ENSG00000168710	AHCYL1	5.63e-11	TRUE	<0.01
rs11774212	10	chr8:145674965-145911194	1.4e-19	ENSG00000167702	KIFC2	5.8e-11	FALSE	<0.01
rs4984682	16	chr16:616995-818865	1.82e-16	ENSG00000103266	STUB1	6.01e-11	FALSE	<0.01
rs1582931;rs147987632;rs74723465	2	chr5:122680579-122952739	1.57e-07	ENSG00000151292	CSNK1G3	6.05e-11	TRUE	<0.01
rs3019846;rs35767618	1	chr11:70313961-70963623	7.54e-06	ENSG00000162105	SHANK2	6.16e-11	FALSE	<0.01
rs117799466	1	chr15:34651110-34659479	1.19e-11	ENSG00000176454	LPCAT4	6.39e-11	TRUE	<0.01
rs144908022	19	chr11:64590859-64902004	4.21e-06	ENSG00000110025	SNX15	6.42e-11	FALSE	<0.01
rs933738	7	chr12:49760367-50158717	2.08e-09	ENSG00000123352	SPATS2	6.59e-11	FALSE	<0.01
rs74453875;rs62260764;rs11709573;rs9859556;rs3172494;rs74473238;rs144519232;rs55786114;rs2624818;rs71325001;rs34037363;rs55689339;rs141260127;rs112269639;rs11716398;rs190848966;rs55935606;rs62263033;rs116033001;rs77719387;rs140021702;rs6780575;rs3731507;rs116656374;rs62248598;rs182355396;rs1264194;rs73083140;rs113893318;rs116192940;rs138484388;rs736471;rs11720093;rs140269757;rs114182490;rs7308914…	107	chr3:46899362-52090566	4.61e-82	ENSG00000178252	WDR6	6.68e-11	FALSE	<0.01
rs35016816;rs1097784;rs142133015;rs71379044	1	chr16:9847261-10276611	3.56e-14	ENSG00000183454	GRIN2A	6.87e-11	TRUE	<0.01
rs214626;rs117868203;rs9696501	5	chr9:135600965-135867083	1.58e-08	ENSG00000165699	TSC1	7.09e-11	FALSE	<0.01
rs6436143	3	chr2:220114433-220174370	3.42e-06	ENSG00000054356	PTPRN	7.18e-11	TRUE	<0.01
rs17325488;rs79886465;rs61387839;rs61283909	3	chr2:48541776-48826025	1.11e-08	ENSG00000162869	PPP1R21	7.25e-11	TRUE	<0.01
rs2795023	2	chr20:11871371-11907257	5.67e-06	ENSG00000236526	-	7.27e-11	FALSE	<0.01
rs74415461;rs118124826;rs35754755;rs4785577;rs9673820;rs9932312;rs12917772;rs8047204	26	chr16:89154783-90142338	6.25e-12	ENSG00000178773	CPNE7	7.91e-11	FALSE	<0.01
rs4352658	4	chr6:88117701-88411927	1.71e-13	ENSG00000135334	AKIRIN2	8.09e-11	FALSE	<0.01
rs7729926;rs72801644	13	chr5:137203480-137772717	1.16e-06	ENSG00000120733	KDM3B	8.23e-11	FALSE	<0.01
rs1527878;rs4666851	1	chr2:183004763-183387919	1.49e-10	ENSG00000115252	PDE1A	8.29e-11	TRUE	<0.01
rs62247449;rs853286;rs1070070;rs26937	1	chr3:64079543-64253655	8.79e-16	ENSG00000163637	PRICKLE2	8.3e-11	TRUE	<0.01
rs11545169	5	chr3:183852826-184402546	1.55e-07	ENSG00000163888	CAMK2N2	8.52e-11	FALSE	<0.01
rs4919624;rs73344830;rs118079769;rs11190955;rs11596387;rs61874089;rs11191206;rs117104675;rs3781292;rs118059379;rs75709864	21	chr10:103113820-104192418	1e-32	ENSG00000107862	GBF1	8.82e-11	TRUE	<0.01
rs2183271	4	chr10:21783421-22292698	1.91e-08	ENSG00000078403	MLLT10	8.85e-11	TRUE	<0.01
rs16917562	1	chr8:53023399-53373519	8.31e-07	ENSG00000147488	ST18	8.87e-11	TRUE	<0.01
rs4839155;rs1538389;rs2076586;rs197420	5	chr1:112084840-112531777	4.66e-12	ENSG00000171385	KCND3	9.02e-11	FALSE	<0.01
rs56016194	6	chr2:210636717-211179914	1.93e-06	ENSG00000144406	UNC80	9.08e-11	FALSE	<0.01
rs5771206	4	chr22:50528308-50656045	7.92e-06	ENSG00000073150	PANX2	9.44e-11	FALSE	<0.01
rs72751651	9	chr1:224102741-226595780	7.54e-06	ENSG00000143786	CNIH3	9.44e-11	FALSE	<0.01
rs11022719	1	chr11:13298199-13408813	5.17e-08	ENSG00000133794	ARNTL	9.92e-11	TRUE	<0.01
rs155947	4	chr5:139487362-139682706	7.47e-07	ENSG00000185129	PURA	9.94e-11	FALSE	<0.01
rs111235962;rs76133558	5	chr1:20808884-20978004	2.21e-08	ENSG00000162545	CAMK2N1	9.97e-11	TRUE	<0.01
rs113714691;rs4739994;rs56262713	1	chr8:85095022-85834079	5.75e-08	ENSG00000184672	RALYL	9.99e-11	TRUE	<0.01
rs10760303	1	chr9:126763949-126795580	7.44e-08	ENSG00000106689	LHX2	1.04e-10	TRUE	<0.01
rs3093361	3	chr16:27413686-27791689	6.64e-07	ENSG00000047578	KIAA0556	1.05e-10	FALSE	<0.01
rs3751331;rs138569349;rs1148547	20	chr12:57984957-58351052	1.75e-11	ENSG00000240771	ARHGEF25	1.06e-10	FALSE	<0.01
rs11592299;rs3781339;rs12774577;rs10748841;rs76957677;rs2986016;rs1538205;rs146952142;rs138873813;rs3740409	22	chr10:104221149-105615301	8.69e-13	ENSG00000107954	NEURL	1.07e-10	TRUE	<0.01
rs117340654;rs642803;rs585557;rs76878669;rs35947684;rs118151305;rs10896139;rs116864252;rs4930188;rs35111506;rs72939178;rs479018;rs7127808;rs7120517;rs118011160;rs117309574	93	chr11:65029233-67407031	3.1e-17	ENSG00000172757	CFL1	1.23e-10	FALSE	<0.01
rs2287838	2	chr19:9945999-10047070	1.27e-13	ENSG00000105088	OLFM2	1.25e-10	FALSE	<0.01
rs13117856;rs13125240;rs1658515;rs836313;rs72694206	4	chr4:172733405-174256276	4.64e-08	ENSG00000109586	GALNT7	1.25e-10	TRUE	<0.01
rs73219806	2	chr8:26149007-26363152	1.97e-08	ENSG00000221914	PPP2R2A	1.27e-10	FALSE	<0.01
rs4788115;rs4788080;rs4788106;rs240708	15	chr16:28477983-29002104	1.23e-28	ENSG00000168488	ATXN2L	1.3e-10	FALSE	<0.01
rs74453875;rs62260764;rs11709573;rs9859556;rs3172494;rs74473238;rs144519232;rs55786114;rs2624818;rs71325001;rs34037363;rs55689339;rs141260127;rs112269639;rs11716398;rs190848966;rs55935606;rs62263033;rs116033001;rs77719387;rs140021702;rs6780575;rs3731507;rs116656374;rs62248598;rs182355396;rs1264194;rs73083140;rs113893318;rs116192940;rs138484388;rs736471;rs11720093;rs140269757;rs114182490;rs7308914…	107	chr3:46899362-52090566	4.61e-82	ENSG00000003756	RBM5	1.34e-10	TRUE	<0.01
rs7299842;rs11043298;rs10773208;rs12810587;rs78440611;rs11058322;rs10773002;rs34436758;rs10773515;rs12811983;rs112365238;rs61955089;rs146898200	26	chr12:122457328-124083116	2.5e-30	ENSG00000176383	B3GNT4	1.35e-10	TRUE	<0.01
rs10208;rs2521602	2	chr17:42269174-42298994	2.07e-09	ENSG00000108312	UBTF	1.48e-10	TRUE	<0.01
rs1505676;rs4860418;rs62306379	1	chr4:62066976-62938184	6.67e-09	ENSG00000150471	LPHN3	1.52e-10	TRUE	<0.01
rs382196;rs1703127	1	chr3:9022275-9404737	1.47e-08	ENSG00000196220	SRGAP3	1.53e-10	FALSE	<0.01
rs10983324;rs4633129	2	chr9:119187504-120177348	3.55e-08	ENSG00000119401	TRIM32	1.59e-10	TRUE	<0.01
rs9862416	3	chr3:23933151-24021237	1.48e-06	ENSG00000174738	NR1D2	1.66e-10	FALSE	<0.01
rs10752262;rs7905192;rs2801496;rs11591680	1	chr10:12391481-12877545	1.28e-12	ENSG00000183049	CAMK1D	1.71e-10	TRUE	<0.01
rs277828;rs7331122	1	chr13:109248500-109860355	1.97e-07	ENSG00000041515	MYO16	1.71e-10	TRUE	<0.01
rs111821073;rs4743729	4	chr9:99082988-99382112	1.58e-10	ENSG00000130956	HABP4	1.73e-10	FALSE	<0.01
rs13018640;rs71413877;rs72819118;rs192225848;rs72821189;rs10166286;rs10168615;rs17023131;rs79430745;rs6715321;rs4851263;rs4851338;rs13009915;rs1346620;rs77826402;rs62147651;rs62156361;rs6733011;rs11690621;rs116398129;rs111377325;rs11690494;rs744145	19	chr2:99061317-101034118	1.05e-50	ENSG00000196872	C2orf55	1.74e-10	TRUE	<0.01
rs78648104;rs1923523;rs200234	5	chr6:50555320-50880969	1.7e-08	ENSG00000008197	TFAP2D	1.77e-10	TRUE	<0.01
rs2179508	4	chr6:145822719-146758734	7.95e-07	ENSG00000152822	GRM1	1.79e-10	TRUE	<0.01
rs114468556;rs17669337;rs141834426;rs6890998;rs2029401;rs10074178;rs17315154;rs6873367;rs13175613;rs10059375	8	chr5:92746995-94620279	1.99e-16	ENSG00000175745	NR2F1	1.82e-10	TRUE	<0.01
rs6711399	3	chr2:200134223-200523855	1.16e-08	ENSG00000119042	SATB2	1.82e-10	FALSE	<0.01
rs4984682	16	chr16:616995-818865	1.82e-16	ENSG00000103269	RHBDL1	1.9e-10	FALSE	<0.01
rs2253090	1	chr11:106555148-106889250	8.54e-06	ENSG00000152402	GUCY1A2	1.91e-10	TRUE	<0.01
rs77025239;rs115732722;rs2718789;rs6443703;rs4134231;rs114600294;rs4855042;rs10937063	5	chr3:180320646-181508734	4.65e-13	ENSG00000242808	SOX2-OT	1.93e-10	TRUE	<0.01
rs2706762;rs3796097	7	chr2:70187226-70508323	6.67e-07	ENSG00000116001	TIA1	2e-10	FALSE	<0.01
rs28862724	3	chr7:5470966-5603415	2.9e-06	ENSG00000075624	ACTB	2e-10	FALSE	<0.01
rs10496091;rs116386746;rs28551472;rs56949301;rs145281763;rs11693744	9	chr2:60983365-61765761	3.71e-17	ENSG00000115464	USP34	2.11e-10	FALSE	<0.01
rs7502541;rs9902820;rs62082093	14	chr17:56422539-57353322	3.9e-07	ENSG00000108395	TRIM37	2.17e-10	FALSE	<0.01
rs7254263;rs1807052;rs73021632	1	chr19:30863328-31048965	1.84e-14	ENSG00000198597	ZNF536	2.17e-10	TRUE	<0.01
rs17563464;rs13168136;rs114699946;rs62346461	1	chr5:26880709-27121257	1.74e-17	ENSG00000113100	CDH9	2.3e-10	TRUE	<0.01
rs6557171;rs11155813;rs149300552;rs852000;rs488133;rs214942	2	chr6:151977826-152958936	5.48e-25	ENSG00000131018	SYNE1	2.38e-10	TRUE	<0.01
rs145054300;rs77675579	19	chr11:46299212-47357945	7.18e-08	ENSG00000110497	AMBRA1	2.43e-10	FALSE	<0.01
rs1320139;rs73961845;rs10928190;rs11681284;rs34624793;rs57628766;rs6716352;rs111761955;rs115041364;rs10176686	3	chr2:143848931-145090135	7.62e-26	ENSG00000121964	GTDC1	2.67e-10	TRUE	<0.01
rs17144467	1	chr7:121958481-122526813	8.74e-11	ENSG00000081803	CADPS2	2.75e-10	FALSE	<0.01
rs58950082;rs12532917	1	chr7:54610018-54638773	4.77e-08	ENSG00000170419	VSTM2A	2.82e-10	TRUE	<0.01
rs9306268	6	chr22:31795509-32303001	3.55e-06	ENSG00000183530	PRR14L	2.9e-10	FALSE	<0.01
rs62178566	1	chr2:217122588-217236750	5.25e-06	ENSG00000144583	42798	2.97e-10	TRUE	<0.01
rs10145520;rs7148741;rs11623188	6	chr14:21819631-21979517	4.78e-12	ENSG00000100888	CHD8	3.01e-10	TRUE	<0.01
rs17205908	2	chr6:127587755-127664754	7.71e-10	ENSG00000118518	RNF146	3.16e-10	FALSE	<0.01
rs11542663;rs36193424;rs150737063	3	chr6:119134618-119470552	2.44e-13	ENSG00000111879	FAM184A	3.22e-10	FALSE	<0.01
rs28737193;rs8032033	5	chr15:82422571-83474822	1.94e-07	ENSG00000103723	AP3B2	3.32e-10	TRUE	<0.01
rs60942669	1	chr10:76585340-76792380	9.43e-08	ENSG00000156650	KAT6B	3.33e-10	TRUE	<0.01
rs7084508	1	chr10:133918175-133998313	8.79e-09	ENSG00000188385	JAKMIP3	3.7e-10	TRUE	<0.01
rs401966;rs4729761;rs4729767	1	chr7:101459219-101927250	1.72e-11	ENSG00000257923	CUX1	4.05e-10	TRUE	<0.01
rs10515007;rs17622379;rs17609255	1	chr17:49707675-50237377	8.07e-14	ENSG00000154975	CA10	4.2e-10	TRUE	<0.01
rs12324361	2	chr15:73735499-73925756	9.65e-07	ENSG00000156642	NPTN	4.54e-10	TRUE	<0.01
rs933738	7	chr12:49760367-50158717	2.08e-09	ENSG00000110844	PRPF40B	5.15e-10	FALSE	<0.01
rs56139009;rs7916697	9	chr10:69865912-70454239	2.21e-06	ENSG00000096746	HNRNPH3	5.31e-10	FALSE	<0.01
rs57352738;rs6953316;rs10239077	2	chr7:132937829-133949343	2.51e-18	ENSG00000131558	EXOC4	5.46e-10	TRUE	<0.01
rs2577901	1	chr8:65285885-65296344	5.46e-07	ENSG00000254377	-	5.6e-10	TRUE	<0.01
rs35606437;rs12547205;rs7828534	1	chr8:92967203-93115514	3.98e-11	ENSG00000079102	RUNX1T1	5.74e-10	TRUE	<0.01
rs9815854	1	chr3:139654027-140286919	4.56e-06	ENSG00000158258	CLSTN2	6.04e-10	TRUE	<0.01
rs61748951	28	chr1:155158300-156182587	1.31e-08	ENSG00000160753	RUSC1	6.13e-10	FALSE	<0.01
rs2471628	1	chr17:36686259-36762183	8.07e-07	ENSG00000017373	SRCIN1	6.19e-10	TRUE	<0.01
rs9611597;rs9607859;rs4822112;rs148537066;rs2899355;rs2142695	35	chr22:41165634-42828401	2.3e-08	ENSG00000100207	TCF20	6.34e-10	TRUE	<0.01
rs143743568	1	chr22:39257455-39268319	4.99e-09	ENSG00000183741	CBX6	6.39e-10	TRUE	<0.01
rs61748951	28	chr1:155158300-156182587	1.31e-08	ENSG00000160803	UBQLN4	6.54e-10	FALSE	<0.01
rs2336721;rs6802671;rs77321042	20	chr3:52350335-53226733	1.05e-10	ENSG00000163939	PBRM1	6.91e-10	FALSE	<0.01
rs10789934	2	chr11:112830002-113149158	8.43e-07	ENSG00000149294	NCAM1	6.98e-10	FALSE	<0.01
rs12619019;rs138094079;rs11690765	5	chr2:202937978-203634480	1.1e-07	ENSG00000204217	BMPR2	7.06e-10	FALSE	<0.01
rs363096;rs362307;rs4690081;rs6853599;rs6824567;rs116069820	12	chr4:2794750-3451211	5.77e-24	ENSG00000188981	C4orf44	7.14e-10	TRUE	<0.01
rs11871429;rs73984100;rs34257140;rs78954500;rs139296776	10	chr17:42733762-43045644	2.52e-14	ENSG00000073670	ADAM11	7.29e-10	TRUE	<0.01
rs11174399;rs1146079;rs11173930	4	chr12:62102040-62991363	2.42e-10	ENSG00000061987	MON2	7.31e-10	FALSE	<0.01
rs12285074	5	chr11:116714118-117103241	5.11e-12	ENSG00000168092	PAFAH1B2	7.38e-10	FALSE	<0.01
rs9888796;rs62059344;rs255053;rs111965666;rs3868142	51	chr16:67143915-68601039	1.2e-12	ENSG00000135740	SLC9A5	7.57e-10	FALSE	<0.01
rs6428152	5	chr1:192984889-193223031	5.23e-06	ENSG00000116747	TROVE2	7.79e-10	FALSE	<0.01
rs192436652;rs17516383	4	chr19:54926373-54984411	2.06e-12	ENSG00000167614	TTYH1	7.87e-10	TRUE	<0.01
rs3093361	3	chr16:27413686-27791689	6.64e-07	ENSG00000077235	GTF3C1	8.18e-10	FALSE	<0.01
rs2669892;rs2718414	1	chr3:114056941-114866118	8.58e-08	ENSG00000181722	ZBTB20	8.93e-10	FALSE	<0.01
rs4664983;rs11693305	2	chr2:159313476-159591514	4.11e-09	ENSG00000144283	PKP4	9.28e-10	FALSE	<0.01
rs145054300;rs77675579	19	chr11:46299212-47357945	7.18e-08	ENSG00000180720	CHRM4	9.32e-10	FALSE	<0.01
rs3935865;rs4239060	1	chr17:1837978-1928178	2.26e-06	ENSG00000185924	RTN4RL1	9.69e-10	FALSE	<0.01
rs1408430;rs6043521;rs8122234;rs2423844;rs2050405;rs6043944;rs764467;rs1015581;rs6079578;rs775114	5	chr20:13976015-16567338	7.09e-10	ENSG00000172264	MACROD2	1e-09	FALSE	<0.01
rs34921066	1	chr12:124808961-125052135	2.21e-06	ENSG00000196498	NCOR2	1.02e-09	TRUE	<0.01
rs1157078	1	chr13:47407513-47471169	5.51e-07	ENSG00000102468	HTR2A	1.05e-09	TRUE	<0.01
rs7924036;rs1061259;rs11591870;rs2403220;rs114219394;rs113409105;rs4481919;rs16918667;rs2438390;rs117452816;rs16918864;rs117589535	3	chr10:64893050-65384883	2.55e-21	ENSG00000171988	JMJD1C	1.06e-09	TRUE	<0.01
rs2335726	1	chr12:3490515-3703139	4.34e-06	ENSG00000111218	PRMT8	1.11e-09	TRUE	<0.01
rs12468040;rs72792395;rs163229;rs4952728;rs698819	5	chr2:44502599-45173216	3.12e-21	ENSG00000143919	CAMKMT	1.16e-09	TRUE	<0.01
rs332649	1	chr13:107822318-108519083	2.4e-06	ENSG00000204442	FAM155A	1.2e-09	TRUE	<0.01
rs118093058;rs117862461;rs4034	31	chr11:62201016-63177766	3.78e-12	ENSG00000214753	HNRNPUL2	1.21e-09	FALSE	<0.01
rs891793;rs3098527;rs10152967	1	chr15:27216429-27778373	1.87e-12	ENSG00000182256	GABRG3	1.23e-09	TRUE	<0.01
rs10415488	1	chr19:5173977-5340814	1.88e-06	ENSG00000105426	PTPRS	1.25e-09	TRUE	<0.01
rs9655780;rs2470966;rs4730020;rs17706792;rs16869996;rs6961668	6	chr7:103969104-105039755	3.7e-16	ENSG00000005483	MLL5	1.32e-09	FALSE	<0.01
rs533241	3	chr2:230222345-230877825	7.92e-07	ENSG00000153827	TRIP12	1.33e-09	FALSE	<0.01
rs10830858;rs1622987;rs556610;rs1631283	1	chr11:92085262-92629618	5.31e-11	ENSG00000165323	FAT3	1.35e-09	TRUE	<0.01
rs61748951	28	chr1:155158300-156182587	1.31e-08	ENSG00000132718	SYT11	1.37e-09	FALSE	<0.01
rs148526428;rs145480052	17	chr12:110288959-111180744	4.87e-07	ENSG00000174437	ATP2A2	1.38e-09	FALSE	<0.01
rs3848715	3	chr20:44527399-44600833	1.07e-08	ENSG00000100982	PCIF1	1.47e-09	TRUE	<0.01
rs62506074;rs2725370;rs146759140;rs62506068	2	chr8:30853321-31031285	4.96e-20	ENSG00000172733	PURG	1.49e-09	TRUE	<0.01
rs74453875;rs62260764;rs11709573;rs9859556;rs3172494;rs74473238;rs144519232;rs55786114;rs2624818;rs71325001;rs34037363;rs55689339;rs141260127;rs112269639;rs11716398;rs190848966;rs55935606;rs62263033;rs116033001;rs77719387;rs140021702;rs6780575;rs3731507;rs116656374;rs62248598;rs182355396;rs1264194;rs73083140;rs113893318;rs116192940;rs138484388;rs736471;rs11720093;rs140269757;rs114182490;rs7308914…	107	chr3:46899362-52090566	4.61e-82	ENSG00000164080	RAD54L2	1.5e-09	FALSE	<0.01
rs1412401;rs6477314;rs2475335;rs10759006;rs10809393;rs1333111;rs141338962;rs6477309	1	chr9:8314246-10612723	6.42e-08	ENSG00000153707	PTPRD	1.57e-09	TRUE	<0.01
rs2954114;rs112279125	5	chr12:122150658-122326517	9.4e-09	ENSG00000139718	SETD1B	1.65e-09	FALSE	<0.01
rs2336721;rs6802671;rs77321042	20	chr3:52350335-53226733	1.05e-10	ENSG00000163930	BAP1	1.7e-09	FALSE	<0.01
rs9556958;rs9513416;rs2772357	3	chr13:98795434-99230194	5.96e-15	ENSG00000102572	STK24	1.76e-09	FALSE	<0.01
rs7972246;rs71452042;rs73091149	6	chr12:27091316-27576241	1.01e-13	ENSG00000111790	FGFR1OP2	1.81e-09	FALSE	<0.01
rs62182994;rs6757087;rs138105457;rs72946572;rs10204636	1	chr2:212240446-213403565	2.55e-19	ENSG00000178568	ERBB4	1.84e-09	TRUE	<0.01
rs12893970;rs1152470	1	chr14:56584532-56768244	3.65e-07	ENSG00000139946	PELI2	1.91e-09	TRUE	<0.01
rs56794817;rs145185045	3	chr17:59759985-60142643	1.69e-10	ENSG00000108510	MED13	1.93e-09	TRUE	<0.01
rs9888796;rs62059344;rs255053;rs111965666;rs3868142	51	chr16:67143915-68601039	1.2e-12	ENSG00000159720	ATP6V0D1	1.97e-09	FALSE	<0.01
rs1054442;rs80257979;rs11168951;rs11168828	15	chr12:49297286-49692465	1.1e-20	ENSG00000169884	WNT10B	2.02e-09	FALSE	<0.01
rs56301739	1	chr3:12938719-13114617	2.03e-07	ENSG00000144711	IQSEC1	2.03e-09	TRUE	<0.01
rs35751693;rs13034349;rs35836525;rs11692435	9	chr2:97541620-98612388	8.04e-10	ENSG00000115073	ACTR1B	2.03e-09	TRUE	<0.01
rs4938815	1	chr11:120382468-120859101	2.99e-08	ENSG00000149403	GRIK4	2.04e-09	TRUE	<0.01
rs12891191	1	chr14:58030640-58448912	1.21e-08	ENSG00000151812	SLC35F4	2.06e-09	FALSE	<0.01
rs7974852;rs4763377	2	chr12:14518610-14721283	1.14e-16	ENSG00000171681	ATF7IP	2.15e-09	TRUE	<0.01
rs721579;rs56319902;rs538628;rs143699161;rs11657021	14	chr17:43340488-44896082	5.81e-33	ENSG00000256762	STH	2.17e-09	FALSE	<0.01
rs72679494	2	chr14:39734488-39901704	2.91e-06	ENSG00000165355	FBXO33	2.24e-09	TRUE	<0.01
rs1464297;rs75308819;rs10169002;rs113193970;rs17650634;rs72972965;rs7598465;rs344693	1	chr2:139428342-139537918	1.49e-13	ENSG00000144227	NXPH2	2.24e-09	TRUE	<0.01
rs11871429;rs73984100;rs34257140;rs78954500;rs139296776	10	chr17:42733762-43045644	2.52e-14	ENSG00000131094	C1QL1	2.27e-09	TRUE	<0.01
rs13402497;rs956534	1	chr2:115199876-116603328	1.33e-08	ENSG00000175497	DPP10	2.31e-09	FALSE	<0.01
rs12694681;rs13015496;rs7596137	1	chr2:226265364-226518734	2.13e-11	ENSG00000144460	KIAA1486	2.33e-09	TRUE	<0.01
rs9683585;rs1203765;rs11248108	5	chr4:2271309-2758103	2.46e-09	ENSG00000125386	FAM193A	2.39e-09	FALSE	<0.01
rs6123924;rs911149;rs73138896;rs6027138	1	chr20:58152564-58422766	3.2e-11	ENSG00000087495	PHACTR3	2.47e-09	TRUE	<0.01
rs60717745;rs11770132	6	chr7:75528518-75916605	1.08e-09	ENSG00000177679	SRRM3	2.51e-09	TRUE	<0.01
rs62066708	5	chr17:43186335-43324681	5.22e-07	ENSG00000186834	HEXIM1	2.53e-09	FALSE	<0.01
rs114837482	2	chr2:76974845-77820445	2.26e-07	ENSG00000176204	LRRTM4	2.62e-09	FALSE	<0.01
rs62474371	1	chr7:98246609-98259180	3.54e-06	ENSG00000106236	NPTX2	2.64e-09	TRUE	<0.01
rs12273435;rs57204268;rs117677995;rs73034295	2	chr11:133710526-133826880	4.72e-14	ENSG00000080854	IGSF9B	2.64e-09	TRUE	<0.01
rs795230	1	chr11:30406040-30608419	9.56e-09	ENSG00000066382	MPPED2	2.65e-09	TRUE	<0.01
rs785499	8	chr1:46049518-46642160	2.02e-07	ENSG00000117461	PIK3R3	2.65e-09	FALSE	<0.01
rs72829007	2	chr10:64099347-64431771	2.52e-06	ENSG00000138311	ZNF365	2.68e-09	TRUE	<0.01
rs35929923;rs2700297	1	chr7:21467652-21554440	1.77e-12	ENSG00000105866	SP4	2.69e-09	TRUE	<0.01
rs2910823;rs27220;rs72755130;rs981230;rs79798166;rs4283754;rs13361043;rs4647102;rs10223052;rs77505016;rs79009682;rs6449503;rs79855925;rs9291710;rs112282911;rs293021;rs74913791;rs72757182;rs76981775;rs62370504;rs153384;rs138236239;rs16890369;rs141883478;rs11958102;rs7719721;rs115583034	12	chr5:57878048-61047590	1.84e-39	ENSG00000152932	RAB3C	2.76e-09	TRUE	<0.01
rs7650602;rs13063991	2	chr3:141043055-141334184	2.77e-10	ENSG00000177311	ZBTB38	2.8e-09	FALSE	<0.01
rs2314338;rs118101047;rs507671;rs112199584	9	chr17:38278790-38613983	9.5e-09	ENSG00000108352	RAPGEFL1	2.82e-09	TRUE	<0.01
rs7146574	1	chr14:101003486-101053750	5.32e-06	ENSG00000183092	BEGAIN	2.94e-09	TRUE	<0.01
rs9888796;rs62059344;rs255053;rs111965666;rs3868142	51	chr16:67143915-68601039	1.2e-12	ENSG00000103056	SMPD3	2.95e-09	FALSE	<0.01
rs60547137	1	chr4:96083655-96470357	5.39e-08	ENSG00000182168	UNC5C	2.99e-09	TRUE	<0.01
rs9470386	2	chr6:36555311-36932613	5.02e-06	ENSG00000124772	CPNE5	3.01e-09	FALSE	<0.01
rs9862416	3	chr3:23933151-24021237	1.48e-06	ENSG00000197885	NKIRAS1	3.09e-09	TRUE	<0.01
rs4242099	4	chr5:43444354-43707507	3.57e-06	ENSG00000172239	PAIP1	3.12e-09	FALSE	<0.01
rs74615093;rs77295380	12	chr16:68877509-69419859	3.67e-08	ENSG00000132612	VPS4A	3.23e-09	FALSE	<0.01
rs58779949;rs11231643	24	chr11:63606400-64139687	3.84e-09	ENSG00000072518	MARK2	3.33e-09	FALSE	<0.01
rs6509303	3	chr19:47341423-47508323	1.5e-06	ENSG00000160007	ARHGAP35	3.5e-09	FALSE	<0.01
rs9415068;rs11000468	6	chr10:74033678-74714536	1.41e-07	ENSG00000156026	MCU	3.6e-09	FALSE	<0.01
rs11157931	5	chr14:23369854-23479375	3.86e-22	ENSG00000100461	RBM23	3.6e-09	FALSE	<0.01
rs6672986;rs6425305;rs114720347;rs76160630;rs146693799	16	chr1:173386932-174992561	6.42e-11	ENSG00000185278	ZBTB37	3.66e-09	FALSE	<0.01
rs806816;rs3006641	2	chr10:32094365-32345359	4.8e-10	ENSG00000170759	KIF5B	3.69e-09	TRUE	<0.01
rs1196760;rs117789814	6	chr12:105196331-105630016	2e-08	ENSG00000136044	APPL2	3.72e-09	FALSE	<0.01
rs3026996	3	chr1:159141399-159176290	5.42e-17	ENSG00000162706	CADM3	3.76e-09	FALSE	<0.01
rs13018640;rs71413877;rs72819118;rs192225848;rs72821189;rs10166286;rs10168615;rs17023131;rs79430745;rs6715321;rs4851263;rs4851338;rs13009915;rs1346620;rs77826402;rs62147651;rs62156361;rs6733011;rs11690621;rs116398129;rs111377325;rs11690494;rs744145	19	chr2:99061317-101034118	1.05e-50	ENSG00000115526	CHST10	3.85e-09	TRUE	<0.01
rs9888796;rs62059344;rs255053;rs111965666;rs3868142	51	chr16:67143915-68601039	1.2e-12	ENSG00000102974	CTCF	3.87e-09	FALSE	<0.01
rs1064193	5	chr11:118964564-119033360	3.39e-07	ENSG00000172375	C2CD2L	3.98e-09	FALSE	<0.01
rs721579;rs56319902;rs538628;rs143699161;rs11657021	14	chr17:43340488-44896082	5.81e-33	ENSG00000120071	KIAA1267	4.06e-09	FALSE	<0.01
rs1543129	1	chr2:196440701-196602426	9.2e-06	ENSG00000196950	SLC39A10	4.09e-09	TRUE	<0.01
rs76145129	6	chr20:62588055-62703700	3.89e-06	ENSG00000196700	ZNF512B	4.17e-09	FALSE	<0.01
rs7299842;rs11043298;rs10773208;rs12810587;rs78440611;rs11058322;rs10773002;rs34436758;rs10773515;rs12811983;rs112365238;rs61955089;rs146898200	26	chr12:122457328-124083116	2.5e-30	ENSG00000090975	PITPNM2	4.34e-09	FALSE	<0.01
rs74532781	1	chr9:130965658-131017527	6.52e-08	ENSG00000106976	DNM1	4.42e-09	FALSE	<0.01
rs17568389;rs7786263;rs73049290	2	chr7:7680342-8133902	1.62e-19	ENSG00000106415	GLCCI1	4.76e-09	TRUE	<0.01
rs1671770;rs1718188;rs10774563;rs113473640	18	chr12:120881764-121623876	9.05e-12	ENSG00000022840	RNF10	4.81e-09	FALSE	<0.01
rs2935790;rs61319473	1	chr8:109619079-109799844	2.38e-06	ENSG00000164841	TMEM74	4.99e-09	TRUE	<0.01
rs10903358	6	chr10:855484-1178237	1.01e-06	ENSG00000107929	LARP4B	5.03e-09	FALSE	<0.01
rs2910823;rs27220;rs72755130;rs981230;rs79798166;rs4283754;rs13361043;rs4647102;rs10223052;rs77505016;rs79009682;rs6449503;rs79855925;rs9291710;rs112282911;rs293021;rs74913791;rs72757182;rs76981775;rs62370504;rs153384;rs138236239;rs16890369;rs141883478;rs11958102;rs7719721;rs115583034	12	chr5:57878048-61047590	1.84e-39	ENSG00000130449	ZSWIM6	5.11e-09	TRUE	<0.01
rs6858725	1	chr4:162305049-163085187	5.93e-06	ENSG00000168843	FSTL5	5.21e-09	FALSE	<0.01
rs870681	1	chr17:77765931-77775482	3.13e-07	ENSG00000141570	CBX8	5.32e-09	TRUE	<0.01
rs1991585	1	chr2:16730727-16847599	6.26e-11	ENSG00000197872	FAM49A	5.38e-09	TRUE	<0.01
rs11715005	2	chr3:184529931-184870802	8.15e-07	ENSG00000187068	C3orf70	5.44e-09	TRUE	<0.01
rs1933264	1	chr6:153331857-153452384	5.85e-10	ENSG00000091844	RGS17	5.56e-09	TRUE	<0.01
rs6881581	10	chr5:140710252-140998622	1.08e-10	ENSG00000240764	PCDHGC5	5.62e-09	FALSE	<0.01
rs11124978	1	chr2:44395108-44471523	5.73e-07	ENSG00000138032	PPM1B	5.62e-09	TRUE	<0.01
rs9649	4	chr17:33897849-34070540	6.13e-09	ENSG00000141150	RASL10B	5.68e-09	TRUE	<0.01
rs9415068;rs11000468	6	chr10:74033678-74714536	1.41e-07	ENSG00000107745	MICU1	5.98e-09	FALSE	<0.01
rs12054166	1	chr3:150126080-150177903	2.3e-09	ENSG00000196428	TSC22D2	6.05e-09	TRUE	<0.01
rs7855503;rs10780614	6	chr9:86237964-86618985	2.39e-09	ENSG00000165119	HNRNPK	6.07e-09	FALSE	<0.01
rs1865955;rs10886012;rs66688522;rs1637565	2	chr10:118430703-118886097	4.06e-11	ENSG00000165868	HSPA12A	6.14e-09	TRUE	<0.01
rs7625428	2	chr3:56591189-56717265	1.07e-11	ENSG00000163946	FAM208A	6.48e-09	FALSE	<0.01
rs4915735;rs2989476;rs2800059;rs1884368;rs17356748;rs80195615	1	chr1:61330931-61928465	9.56e-09	ENSG00000162599	NFIA	6.62e-09	TRUE	<0.01
rs2396366;rs138897545	5	chr19:1905371-2015702	7.72e-08	ENSG00000133275	CSNK1G2	6.76e-09	TRUE	<0.01
rs176218;rs72671456;rs2008001;rs72671469;rs181605407;rs117896175	1	chr14:29241910-29282493	1.1e-29	ENSG00000186960	C14orf23	6.79e-09	FALSE	<0.01
rs2956289	1	chr12:85253492-85307394	4.61e-07	ENSG00000072041	SLC6A15	6.8e-09	TRUE	<0.01
rs12912451	1	chr15:54305101-54920806	5.27e-06	ENSG00000137766	UNC13C	6.9e-09	TRUE	<0.01
rs9884316	1	chr4:26859300-27027003	4e-06	ENSG00000109689	STIM2	6.93e-09	TRUE	<0.01
rs112379405;rs975808;rs77152753	1	chr3:75955846-77699115	7.1e-09	ENSG00000185008	ROBO2	7.38e-09	TRUE	<0.01
rs10937240	2	chr3:185764097-186080026	6.95e-12	ENSG00000058866	DGKG	7.46e-09	FALSE	<0.01
rs721579;rs56319902;rs538628;rs143699161;rs11657021	14	chr17:43340488-44896082	5.81e-33	ENSG00000185829	ARL17A	7.56e-09	FALSE	<0.01
rs72751651	9	chr1:224102741-226595780	7.54e-06	ENSG00000162923	WDR26	7.6e-09	FALSE	<0.01
rs870589	1	chr17:31340105-32483551	2.24e-08	ENSG00000108684	ACCN1	7.68e-09	FALSE	<0.01
rs7136760;rs56073669	1	chr12:75433857-75603648	1.39e-07	ENSG00000166006	KCNC2	7.79e-09	TRUE	<0.01
rs7015738	1	chr8:110586207-110704020	5.46e-07	ENSG00000147642	SYBU	7.96e-09	TRUE	<0.01
rs2545795	4	chr5:176830205-176901402	1.03e-18	ENSG00000113758	DBN1	7.97e-09	FALSE	<0.01
rs117340654;rs642803;rs585557;rs76878669;rs35947684;rs118151305;rs10896139;rs116864252;rs4930188;rs35111506;rs72939178;rs479018;rs7127808;rs7120517;rs118011160;rs117309574	93	chr11:65029233-67407031	3.1e-17	ENSG00000110697	PITPNM1	8.18e-09	FALSE	<0.01
rs16854920	1	chr1:204797779-204991950	9.73e-08	ENSG00000163531	NFASC	8.61e-09	FALSE	<0.01
rs34616566	2	chr4:170314426-170644824	4.2e-07	ENSG00000109572	CLCN3	8.73e-09	FALSE	<0.01
rs35104491;rs1206133;rs76218411;rs118009134	3	chr6:97245888-97588630	6.81e-12	ENSG00000112218	GPR63	8.84e-09	FALSE	<0.01
rs72637439	1	chr13:97873688-98046374	6.04e-06	ENSG00000139793	MBNL2	8.88e-09	TRUE	<0.01
rs12765185	2	chr10:134884433-135039916	2.96e-08	ENSG00000171798	KNDC1	8.94e-09	TRUE	<0.01
rs933738	7	chr12:49760367-50158717	2.08e-09	ENSG00000135519	KCNH3	9.02e-09	TRUE	<0.01
rs12967010;rs7235785	2	chr18:9475007-9614567	1.33e-11	ENSG00000017797	RALBP1	9.17e-09	TRUE	<0.01
rs2838006;rs9974899;rs66482320;rs2836213;rs73366468;rs228081;rs9982370;rs73222273	12	chr21:38437942-45746674	1.38e-19	ENSG00000171587	DSCAM	9.31e-09	TRUE	<0.01
rs11588857;rs884108	4	chr1:204391756-204654861	4.45e-31	ENSG00000170382	LRRN2	9.32e-09	FALSE	<0.01
rs7422060;rs56185973	1	chr2:207139387-207179148	9.42e-07	ENSG00000204186	ZDBF2	9.49e-09	FALSE	<0.01
rs2731034	2	chr12:44902058-45459134	8.43e-07	ENSG00000184613	NELL2	9.54e-09	FALSE	<0.01
rs77025239;rs115732722;rs2718789;rs6443703;rs4134231;rs114600294;rs4855042;rs10937063	5	chr3:180320646-181508734	4.65e-13	ENSG00000181449	SOX2	1.01e-08	TRUE	<0.01
rs9929762	1	chr16:78133551-79246031	1.03e-11	ENSG00000186153	WWOX	1.05e-08	TRUE	<0.01
rs114593137;rs628720;rs6690901	3	chr1:241753404-241965435	1.65e-12	ENSG00000203668	CHML	1.06e-08	TRUE	<0.01
rs74453875;rs62260764;rs11709573;rs9859556;rs3172494;rs74473238;rs144519232;rs55786114;rs2624818;rs71325001;rs34037363;rs55689339;rs141260127;rs112269639;rs11716398;rs190848966;rs55935606;rs62263033;rs116033001;rs77719387;rs140021702;rs6780575;rs3731507;rs116656374;rs62248598;rs182355396;rs1264194;rs73083140;rs113893318;rs116192940;rs138484388;rs736471;rs11720093;rs140269757;rs114182490;rs7308914…	107	chr3:46899362-52090566	4.61e-82	ENSG00000179837	RBM15B	1.07e-08	TRUE	<0.01
rs66721975	1	chr2:191745553-191830278	1.51e-08	ENSG00000115419	GLS	1.09e-08	TRUE	<0.01
rs56047669	1	chr16:57126506-57181878	5.98e-06	ENSG00000140848	CPNE2	1.12e-08	TRUE	<0.01
rs363096;rs362307;rs4690081;rs6853599;rs6824567;rs116069820	12	chr4:2794750-3451211	5.77e-24	ENSG00000197386	HTT	1.18e-08	FALSE	<0.01
rs6121037	11	chr20:34042985-34547394	1.32e-07	ENSG00000131051	RBM39	1.24e-08	TRUE	<0.01
rs2179508	4	chr6:145822719-146758734	7.95e-07	ENSG00000146414	SHPRH	1.25e-08	FALSE	<0.01
rs11780023;rs2977464	2	chr8:141541264-142012315	1.17e-09	ENSG00000123908	EIF2C2	1.3e-08	FALSE	<0.01
rs854796;rs113269212	17	chr17:17750139-18639432	4.66e-09	ENSG00000131899	LLGL1	1.33e-08	FALSE	<0.01
rs4846010;rs34552305	1	chr1:11539223-11597641	3.35e-08	ENSG00000204624	PTCHD2	1.33e-08	TRUE	<0.01
rs7312585;rs4765015	1	chr12:124403207-124457378	5.25e-07	ENSG00000119242	CCDC92	1.36e-08	TRUE	<0.01
rs11876620;rs613872;rs2958182;rs10401120;rs7240100;rs78857663;rs74609952;rs627685;rs7237464	1	chr18:52889562-53303185	1.95e-18	ENSG00000196628	TCF4	1.38e-08	TRUE	<0.01
rs11926624;rs12107377	1	chr3:191859684-192485553	3.6e-06	ENSG00000114279	FGF12	1.4e-08	TRUE	<0.01
rs4788115;rs4788080;rs4788106;rs240708	15	chr16:28477983-29002104	1.23e-28	ENSG00000178188	SH2B1	1.43e-08	FALSE	<0.01
rs11624425	2	chr14:74111578-74256988	9.66e-06	ENSG00000119661	DNAL1	1.44e-08	FALSE	<0.01
rs12909095	7	chr15:43524793-43802926	1.86e-06	ENSG00000067369	TP53BP1	1.44e-08	FALSE	<0.01
rs10819960	4	chr9:104235453-104500862	1.18e-07	ENSG00000165152	C9orf125	1.52e-08	FALSE	<0.01
rs139612798;rs9388304;rs113041470;rs7747596	1	chr6:124125286-125146803	3.1e-07	ENSG00000188580	NKAIN2	1.55e-08	TRUE	<0.01
rs660001;rs2974535;rs111327916;rs3104222;rs73260443;rs6860867	2	chr5:113696666-113915667	1.66e-21	ENSG00000080709	KCNN2	1.64e-08	TRUE	<0.01
rs9551887	2	chr13:30776767-30894040	9.75e-07	ENSG00000102781	KATNAL1	1.67e-08	TRUE	<0.01
rs9611597;rs9607859;rs4822112;rs148537066;rs2899355;rs2142695	35	chr22:41165634-42828401	2.3e-08	ENSG00000198911	SREBF2	1.74e-08	FALSE	<0.01
rs2706762;rs3796097	7	chr2:70187226-70508323	6.67e-07	ENSG00000169564	PCBP1	1.74e-08	FALSE	<0.01
rs6060001	12	chr20:32951041-33680674	7.47e-07	ENSG00000125971	DYNLRB1	1.76e-08	FALSE	<0.01
rs7575938	1	chr2:166845670-166930149	1.13e-09	ENSG00000144285	SCN1A	1.81e-08	TRUE	<0.01
rs2926702;rs57994514	2	chr8:71021997-71316040	4.91e-09	ENSG00000140396	NCOA2	1.84e-08	FALSE	<0.01
rs5754753;rs5754762;rs5754581;rs73154546;rs2001040;rs239320	2	chr22:33561991-34318829	6.15e-16	ENSG00000133424	LARGE	1.89e-08	TRUE	<0.01
rs72993796;rs6706275	1	chr2:239969864-240323348	1.12e-08	ENSG00000068024	HDAC4	1.94e-08	FALSE	<0.01
rs117533546	1	chr9:124329336-124547809	1.62e-06	ENSG00000136848	DAB2IP	2.02e-08	TRUE	<0.01
rs17732878	6	chr17:7328935-7417933	4.06e-08	ENSG00000161958	FGF11	2.06e-08	FALSE	<0.01
rs145054300;rs77675579	19	chr11:46299212-47357945	7.18e-08	ENSG00000175224	ATG13	2.1e-08	FALSE	<0.01
rs12446456	4	chr16:4846969-4987136	7.96e-06	ENSG00000118900	UBN1	2.14e-08	TRUE	<0.01
rs10080647;rs13192403;rs6912671	2	chr6:114290865-114792869	7.05e-10	ENSG00000249853	HS3ST5	2.15e-08	TRUE	<0.01
rs11687736;rs13016316;rs12613725	1	chr2:225334867-225450110	4.66e-12	ENSG00000036257	CUL3	2.24e-08	TRUE	<0.01
rs1401636	1	chr2:222282747-222438922	2.71e-06	ENSG00000116106	EPHA4	2.29e-08	TRUE	<0.01
rs173003	11	chr19:36139125-36279724	5.5e-09	ENSG00000105663	-	2.3e-08	FALSE	<0.01
rs11138947	2	chr9:72043164-72287222	2.36e-11	ENSG00000107282	APBA1	2.3e-08	FALSE	<0.01
rs72634813	2	chr1:1533392-1565990	8.85e-06	ENSG00000228594	-	2.3e-08	TRUE	<0.01
rs117340654;rs642803;rs585557;rs76878669;rs35947684;rs118151305;rs10896139;rs116864252;rs4930188;rs35111506;rs72939178;rs479018;rs7127808;rs7120517;rs118011160;rs117309574	93	chr11:65029233-67407031	3.1e-17	ENSG00000172932	ANKRD13D	2.33e-08	FALSE	<0.01
rs45540434	2	chr9:139889087-139923374	9.98e-07	ENSG00000107331	ABCA2	2.35e-08	FALSE	<0.01
rs728054;rs322349;rs10253968	3	chr7:136912088-137531838	2.34e-18	ENSG00000105894	PTN	2.38e-08	TRUE	<0.01
rs482787	1	chr10:99624757-99790585	1.95e-11	ENSG00000095713	CRTAC1	2.4e-08	TRUE	<0.01
rs1671770;rs1718188;rs10774563;rs113473640	18	chr12:120881764-121623876	9.05e-12	ENSG00000111786	SRSF9	2.4e-08	FALSE	<0.01
rs854796;rs113269212	17	chr17:17750139-18639432	4.66e-09	ENSG00000175662	TOM1L2	2.46e-08	FALSE	<0.01
rs1481034	1	chr18:8706513-8832776	1.5e-07	ENSG00000168502	CCDC165	2.53e-08	TRUE	<0.01
rs35788;rs11001973;rs7916611	1	chr10:78637355-79398353	1.03e-06	ENSG00000156113	KCNMA1	2.71e-08	TRUE	<0.01
rs1918394;rs4416418	2	chr3:74311719-75484261	3.04e-10	ENSG00000113805	CNTN3	2.74e-08	TRUE	<0.01
rs9926649;rs8061964;rs3785092	17	chr16:66460816-66978999	1.58e-08	ENSG00000223154	-	2.74e-08	FALSE	<0.01
rs79728014	1	chr11:45950871-46142985	2.06e-11	ENSG00000135365	PHF21A	2.75e-08	TRUE	<0.01
rs61894507	3	chr11:76092357-76264069	6.48e-07	ENSG00000158636	C11orf30	2.78e-08	TRUE	<0.01
rs198700	1	chr7:24323782-24331484	4.08e-07	ENSG00000122585	NPY	2.79e-08	TRUE	<0.01
rs209857	1	chr1:114631914-114696541	4.32e-06	ENSG00000134207	SYT6	2.8e-08	TRUE	<0.01
rs7815299	1	chr8:91070836-91107703	4.01e-07	ENSG00000104327	CALB1	2.84e-08	TRUE	<0.01
rs74453875;rs62260764;rs11709573;rs9859556;rs3172494;rs74473238;rs144519232;rs55786114;rs2624818;rs71325001;rs34037363;rs55689339;rs141260127;rs112269639;rs11716398;rs190848966;rs55935606;rs62263033;rs116033001;rs77719387;rs140021702;rs6780575;rs3731507;rs116656374;rs62248598;rs182355396;rs1264194;rs73083140;rs113893318;rs116192940;rs138484388;rs736471;rs11720093;rs140269757;rs114182490;rs7308914…	107	chr3:46899362-52090566	4.61e-82	ENSG00000068745	IP6K2	2.88e-08	TRUE	<0.01
rs9927137	11	chr16:30583571-30905623	5.11e-09	ENSG00000103549	RNF40	2.89e-08	FALSE	<0.01
rs151257075;rs16837272	17	chr1:156182773-156647189	7.96e-06	ENSG00000132692	BCAN	2.96e-08	FALSE	<0.01
rs17507342	1	chr3:147111209-147228080	8.51e-07	ENSG00000152977	ZIC1	3e-08	TRUE	<0.01
rs9926649;rs8061964;rs3785092	17	chr16:66460816-66978999	1.58e-08	ENSG00000183723	CMTM4	3.03e-08	TRUE	<0.01
rs8052523	1	chr16:9185475-9215497	2.73e-09	ENSG00000182831	C16orf72	3.19e-08	TRUE	<0.01
rs7008697;rs2127865;rs12677468	1	chr8:106330920-106816760	9.93e-08	ENSG00000169946	ZFPM2	3.21e-08	TRUE	<0.01
rs10006551	1	chr4:105389469-105416058	1.61e-06	ENSG00000168772	CXXC4	3.27e-08	TRUE	<0.01
rs6060001	12	chr20:32951041-33680674	7.47e-07	ENSG00000078747	ITCH	3.28e-08	FALSE	<0.01
rs17243165	4	chr5:43039335-43280952	8.03e-07	ENSG00000172262	ZNF131	3.29e-08	FALSE	<0.01
rs302354	1	chr12:29653757-29937692	3.46e-06	ENSG00000133687	TMTC1	3.34e-08	TRUE	<0.01
rs1167827	2	chr7:75132254-75368280	2.93e-13	ENSG00000127946	HIP1	3.45e-08	FALSE	<0.01
rs73101171;rs2313275;rs9849884;rs6778273;rs2221845;rs12635949	2	chr3:68053359-68981761	2.51e-10	ENSG00000183662	FAM19A1	3.45e-08	TRUE	<0.01
rs117340654;rs642803;rs585557;rs76878669;rs35947684;rs118151305;rs10896139;rs116864252;rs4930188;rs35111506;rs72939178;rs479018;rs7127808;rs7120517;rs118011160;rs117309574	93	chr11:65029233-67407031	3.1e-17	ENSG00000174791	RIN1	3.49e-08	TRUE	<0.01
rs72672718	1	chr4:95679119-96079599	8.98e-07	ENSG00000138696	BMPR1B	3.57e-08	TRUE	<0.01
rs15739	8	chr17:15848231-16256813	6.08e-07	ENSG00000011295	TTC19	3.63e-08	FALSE	<0.01
rs575113;rs12119154	9	chr1:109852192-110155679	7.52e-18	ENSG00000134243	SORT1	3.66e-08	FALSE	<0.01
rs61040326	1	chr8:89044237-89340254	2.49e-07	ENSG00000156103	MMP16	3.67e-08	TRUE	<0.01
rs1334297;rs9537779;rs17190418;rs9527662;rs142747148;rs4886055;rs2321157;rs61958175;rs113720505;rs77370942;rs17572277;rs73207502;rs12429017;rs61955962;rs12869090;rs139544582;rs117795709;rs78645356;rs7333790;rs1581832;rs77086982	1	chr13:58205944-58303445	2.53e-58	ENSG00000118946	PCDH17	3.68e-08	TRUE	<0.01
rs34720381;rs6681173	2	chr1:171454651-171621857	1.9e-13	ENSG00000117523	PRRC2C	3.73e-08	TRUE	<0.01
rs117340654;rs642803;rs585557;rs76878669;rs35947684;rs118151305;rs10896139;rs116864252;rs4930188;rs35111506;rs72939178;rs479018;rs7127808;rs7120517;rs118011160;rs117309574	93	chr11:65029233-67407031	3.1e-17	ENSG00000173020	ADRBK1	3.82e-08	FALSE	<0.01
rs1187326	1	chr9:87283466-87638505	5.6e-08	ENSG00000148053	NTRK2	3.85e-08	TRUE	<0.01
rs117340654;rs642803;rs585557;rs76878669;rs35947684;rs118151305;rs10896139;rs116864252;rs4930188;rs35111506;rs72939178;rs479018;rs7127808;rs7120517;rs118011160;rs117309574	93	chr11:65029233-67407031	3.1e-17	ENSG00000197136	PCNXL3	3.88e-08	FALSE	<0.01
rs12891042;rs8016504;rs1955512	2	chr14:32798479-34273382	1.02e-10	ENSG00000151322	NPAS3	3.88e-08	TRUE	<0.01
rs743316;rs61739710;rs2834287	8	chr21:34757299-35272165	8.21e-11	ENSG00000159140	SON	3.93e-08	FALSE	<0.01
rs12065238	1	chr1:166026674-166136206	5.72e-08	ENSG00000188859	FAM78B	3.98e-08	TRUE	<0.01
rs73007975;rs79894062	5	chr11:113558272-113861035	1.92e-07	ENSG00000166736	HTR3A	3.98e-08	TRUE	<0.01
rs730384;rs7154563	9	chr14:74872596-75370448	9.38e-13	ENSG00000119682	KIAA0317	4e-08	FALSE	<0.01
rs11971332;rs10951590;rs13246220;rs113205706;rs10268735;rs35787907;rs78118326;rs886765	8	chr7:39017598-40900362	3.62e-13	ENSG00000006451	RALA	4.03e-08	FALSE	<0.01
rs7236774;rs28626906	1	chr18:46065417-46389588	5.93e-07	ENSG00000134030	CTIF	4.23e-08	FALSE	<0.01
rs4467547;rs9291436;rs75580530;rs62301577	1	chr4:20730239-21950422	4.88e-17	ENSG00000185774	KCNIP4	4.34e-08	TRUE	<0.01
rs11971332;rs10951590;rs13246220;rs113205706;rs10268735;rs35787907;rs78118326;rs886765	8	chr7:39017598-40900362	3.62e-13	ENSG00000106536	POU6F2	4.42e-08	TRUE	<0.01
rs72906124;rs6720515;rs1554798;rs10164555;rs9288534;rs150844709;rs1400700;rs56226421;rs6742745	1	chr2:157180944-157198860	6.44e-10	ENSG00000153234	NR4A2	4.45e-08	TRUE	<0.01
rs4434676;rs6560155;rs138175676	2	chr9:72999503-74061820	2.83e-10	ENSG00000119138	KLF9	4.52e-08	TRUE	<0.01
rs12145078;rs1747817	2	chr1:197170592-197744826	2.56e-13	ENSG00000134376	CRB1	4.52e-08	FALSE	<0.01
rs9818694;rs1915579	2	chr3:153742190-153975616	5.96e-06	ENSG00000114790	ARHGEF26	4.68e-08	TRUE	<0.01
rs2729762;rs35346988;rs4638330	7	chr11:76839310-77705724	3.03e-07	ENSG00000048649	RSF1	4.68e-08	FALSE	<0.01
rs74453875;rs62260764;rs11709573;rs9859556;rs3172494;rs74473238;rs144519232;rs55786114;rs2624818;rs71325001;rs34037363;rs55689339;rs141260127;rs112269639;rs11716398;rs190848966;rs55935606;rs62263033;rs116033001;rs77719387;rs140021702;rs6780575;rs3731507;rs116656374;rs62248598;rs182355396;rs1264194;rs73083140;rs113893318;rs116192940;rs138484388;rs736471;rs11720093;rs140269757;rs114182490;rs7308914…	107	chr3:46899362-52090566	4.61e-82	ENSG00000067560	RHOA	4.75e-08	FALSE	<0.01
rs56139009;rs7916697	9	chr10:69865912-70454239	2.21e-06	ENSG00000204130	RUFY2	4.89e-08	FALSE	<0.01
rs7016302;rs73191311;rs73175381;rs77500513	1	chr8:2792992-4852494	2.26e-11	ENSG00000183117	CSMD1	4.98e-08	TRUE	<0.01
rs13381557;rs60225156;rs2668767;rs76952457	6	chr18:44259081-44702745	7.4e-10	ENSG00000078043	PIAS2	5.02e-08	FALSE	<0.01
rs2406253;rs10241492;rs4134932	17	chr7:99699172-100092422	3.58e-14	ENSG00000106290	TAF6	5.16e-08	FALSE	<0.01
rs4984613;rs8032157	10	chr15:64199235-65067786	7.76e-10	ENSG00000180357	ZNF609	5.33e-08	FALSE	<0.01
rs61748951	28	chr1:155158300-156182587	1.31e-08	ENSG00000176444	CLK2	5.35e-08	FALSE	<0.01
rs575113;rs12119154	9	chr1:109852192-110155679	7.52e-18	ENSG00000181754	AMIGO1	5.39e-08	TRUE	<0.01
rs12076635;rs112361411;rs2428954;rs45605334;rs145155829;rs1198982;rs61768375;rs1362153;rs1999595;rs150833155	25	chr1:43629846-44497139	3.33e-34	ENSG00000117408	IPO13	5.4e-08	FALSE	<0.01
rs17732878	6	chr17:7328935-7417933	4.06e-08	ENSG00000181222	POLR2A	5.64e-08	FALSE	<0.01
rs78702390;rs7803932;rs188799913;rs2158507;rs6460661;rs75527694	3	chr7:69061133-71178585	1.74e-11	ENSG00000158321	AUTS2	5.79e-08	TRUE	<0.01
rs113520408;rs339057;rs4440553	2	chr7:128379346-128415844	1.03e-22	ENSG00000128617	OPN1SW	5.81e-08	TRUE	<0.01
rs2948063;rs7518528	1	chr1:240931554-241520530	3.41e-06	ENSG00000182901	RGS7	5.82e-08	TRUE	<0.01
rs6428152	5	chr1:192984889-193223031	5.23e-06	ENSG00000134371	CDC73	5.91e-08	FALSE	<0.01
rs7692359	1	chr4:83273651-83295656	1.4e-10	ENSG00000138668	HNRNPD	6.02e-08	TRUE	<0.01
rs3848715	3	chr20:44527399-44600833	1.07e-08	ENSG00000198026	ZNF335	6.02e-08	FALSE	<0.01
rs806816;rs3006641	2	chr10:32094365-32345359	4.8e-10	ENSG00000165322	ARHGAP12	6.23e-08	FALSE	<0.01
rs34780702;rs138818038	1	chr1:197881618-197904608	2.05e-11	ENSG00000143355	LHX9	6.33e-08	TRUE	<0.01
rs77609760;rs74787922;rs7597412;rs10181071;rs10178963;rs16845783;rs9973397;rs74736827	1	chr2:140988992-142889270	7.71e-17	ENSG00000168702	LRP1B	6.47e-08	TRUE	<0.01
rs2702576	2	chr4:14911585-15071777	4.41e-10	ENSG00000137449	CPEB2	6.48e-08	TRUE	<0.01
rs1107871	2	chr12:132195626-132284282	4.18e-09	ENSG00000061936	SFSWAP	6.57e-08	FALSE	<0.01
rs61748951	28	chr1:155158300-156182587	1.31e-08	ENSG00000163374	YY1AP1	6.67e-08	FALSE	<0.01
rs76246107	9	chr19:49977486-50161905	6.52e-10	ENSG00000126464	PRR12	6.67e-08	FALSE	<0.01
rs12537600	1	chr7:18126572-19036993	2.81e-07	ENSG00000048052	HDAC9	6.71e-08	TRUE	<0.01
rs1815532;rs8013401;rs12590545;rs61989562	7	chr14:66953072-67878917	8.01e-08	ENSG00000100554	ATP6V1D	6.78e-08	FALSE	<0.01
rs3111251;rs78365243	8	chr1:211431719-212208884	3.88e-10	ENSG00000117625	RCOR3	6.8e-08	TRUE	<0.01
rs2486550;rs12764593;rs790647;rs11599236;rs7096926;rs12251993;rs72813622;rs35978090;rs10509790;rs10509774;rs117245496;rs139138491;rs6584608;rs72819942;rs72819955;rs876183;rs11595206;rs72827747;rs75001605	5	chr10:106113522-107262113	3.81e-18	ENSG00000156395	SORCS3	6.8e-08	FALSE	<0.01
rs12375949;rs2416845;rs76377664	2	chr9:124584207-124855885	1.61e-22	ENSG00000175764	TTLL11	6.86e-08	FALSE	<0.01
rs9611597;rs9607859;rs4822112;rs148537066;rs2899355;rs2142695	35	chr22:41165634-42828401	2.3e-08	ENSG00000100417	PMM1	6.9e-08	FALSE	<0.01
rs9545395;rs936496;rs185989636;rs17811799	3	chr13:35516424-36705467	3.81e-11	ENSG00000180660	MAB21L1	7.09e-08	TRUE	<0.01
rs139244147;rs12113634;rs187701119	3	chr7:111846643-112121072	7.71e-11	ENSG00000006652	IFRD1	7.14e-08	TRUE	<0.01
rs2044162;rs7014169;rs1443081	2	chr8:33405273-33457624	1.06e-07	ENSG00000133878	DUSP26	7.76e-08	TRUE	<0.01
rs144908022	19	chr11:64590859-64902004	4.21e-06	ENSG00000068971	PPP2R5B	7.88e-08	FALSE	<0.01
rs4810894;rs141979783	6	chr20:47538275-47905797	4.38e-09	ENSG00000124214	STAU1	7.94e-08	TRUE	<0.01
rs11774212	10	chr8:145674965-145911194	1.4e-19	ENSG00000147799	ARHGAP39	8.02e-08	FALSE	<0.01
rs73040059	2	chr3:23236561-23633284	1.23e-07	ENSG00000182247	UBE2E2	8.05e-08	FALSE	<0.01
rs4328757	1	chr3:36868311-36986548	2.95e-11	ENSG00000168016	TRANK1	8.48e-08	TRUE	<0.01
rs2517086	1	chr8:17013538-17082308	8e-10	ENSG00000104219	ZDHHC2	8.65e-08	TRUE	<0.01
rs1880088;rs10766744	1	chr11:20691117-21597227	1.11e-09	ENSG00000165973	NELL1	8.66e-08	FALSE	<0.01
rs11175258	1	chr12:64238073-64541613	4.22e-07	ENSG00000196935	SRGAP1	8.75e-08	FALSE	<0.01
rs1773020	2	chr1:33938232-34631443	7.15e-06	ENSG00000121904	CSMD2	8.85e-08	FALSE	<0.01
rs117340654;rs642803;rs585557;rs76878669;rs35947684;rs118151305;rs10896139;rs116864252;rs4930188;rs35111506;rs72939178;rs479018;rs7127808;rs7120517;rs118011160;rs117309574	93	chr11:65029233-67407031	3.1e-17	ENSG00000258297	-	9.02e-08	FALSE	<0.01
rs151257075;rs16837272	17	chr1:156182773-156647189	7.96e-06	ENSG00000198952	SMG5	9.8e-08	TRUE	<0.01
rs11753095	1	chr6:170477741-170478251	5e-06	ENSG00000232197	-	1.02e-07	TRUE	<0.01
rs67790232;rs10880872	2	chr12:46123448-46385903	6.9e-09	ENSG00000189079	ARID2	1.03e-07	TRUE	<0.01
rs12515392	1	chr5:7396321-7830194	1.55e-07	ENSG00000078295	ADCY2	1.06e-07	TRUE	<0.01
rs2431023;rs3816752;rs1529597	3	chr15:56922379-57599965	5.76e-11	ENSG00000140262	TCF12	1.06e-07	TRUE	<0.01
rs1901018;rs150821390;rs72855101;rs7583892;rs150991676;rs7595461	3	chr2:23608088-24227779	3.22e-07	ENSG00000119771	KLHL29	1.06e-07	TRUE	<0.01
rs12005151;rs4962167	1	chr9:135037334-135119921	3.73e-09	ENSG00000196358	NTNG2	1.06e-07	TRUE	<0.01
rs117340654;rs642803;rs585557;rs76878669;rs35947684;rs118151305;rs10896139;rs116864252;rs4930188;rs35111506;rs72939178;rs479018;rs7127808;rs7120517;rs118011160;rs117309574	93	chr11:65029233-67407031	3.1e-17	ENSG00000175602	CCDC85B	1.06e-07	TRUE	<0.01
rs35192107	4	chr5:145316142-145718814	3.77e-08	ENSG00000091009	RBM27	1.07e-07	FALSE	<0.01
rs74453875;rs62260764;rs11709573;rs9859556;rs3172494;rs74473238;rs144519232;rs55786114;rs2624818;rs71325001;rs34037363;rs55689339;rs141260127;rs112269639;rs11716398;rs190848966;rs55935606;rs62263033;rs116033001;rs77719387;rs140021702;rs6780575;rs3731507;rs116656374;rs62248598;rs182355396;rs1264194;rs73083140;rs113893318;rs116192940;rs138484388;rs736471;rs11720093;rs140269757;rs114182490;rs7308914…	107	chr3:46899362-52090566	4.61e-82	ENSG00000114648	KLHL18	1.07e-07	FALSE	<0.01
rs7167841	1	chr15:37181409-37393504	1.34e-07	ENSG00000134138	MEIS2	1.09e-07	TRUE	<0.01
rs12736382	4	chr1:183441351-183897666	5.33e-08	ENSG00000162704	ARPC5	1.12e-07	FALSE	<0.01
rs42210;rs12659776;rs17069646;rs2569041;rs7709334;rs9313415;rs35613923;rs72835052	2	chr5:166711804-167899308	2.74e-10	ENSG00000145934	ODZ2	1.18e-07	TRUE	<0.01
rs137079	3	chr22:42949623-43045574	3.06e-10	ENSG00000100227	POLDIP3	1.19e-07	FALSE	<0.01
rs117340654;rs642803;rs585557;rs76878669;rs35947684;rs118151305;rs10896139;rs116864252;rs4930188;rs35111506;rs72939178;rs479018;rs7127808;rs7120517;rs118011160;rs117309574	93	chr11:65029233-67407031	3.1e-17	ENSG00000173621	LRFN4	1.22e-07	TRUE	<0.01
rs13089363	1	chr3:88101094-88199035	2.38e-06	ENSG00000163320	CGGBP1	1.23e-07	TRUE	<0.01
rs9916901;rs11082280	1	chr18:40323192-40695657	8.4e-09	ENSG00000152214	RIT2	1.24e-07	TRUE	<0.01
rs2024568	3	chr20:44650329-44758502	1.61e-09	ENSG00000124160	NCOA5	1.26e-07	TRUE	<0.01
rs4919624;rs73344830;rs118079769;rs11190955;rs11596387;rs61874089;rs11191206;rs117104675;rs3781292;rs118059379;rs75709864	21	chr10:103113820-104192418	1e-32	ENSG00000198728	LDB1	1.29e-07	FALSE	<0.01
rs78702390;rs7803932;rs188799913;rs2158507;rs6460661;rs75527694	3	chr7:69061133-71178585	1.74e-11	ENSG00000185274	WBSCR17	1.3e-07	TRUE	<0.01
rs58779949;rs11231643	24	chr11:63606400-64139687	3.84e-09	ENSG00000167771	RCOR2	1.33e-07	FALSE	<0.01
rs118093058;rs117862461;rs4034	31	chr11:62201016-63177766	3.78e-12	ENSG00000162231	NXF1	1.33e-07	FALSE	<0.01
rs4919624;rs73344830;rs118079769;rs11190955;rs11596387;rs61874089;rs11191206;rs117104675;rs3781292;rs118059379;rs75709864	21	chr10:103113820-104192418	1e-32	ENSG00000120049	KCNIP2	1.34e-07	TRUE	<0.01
rs7113456;rs11604751	2	chr11:126225535-126873355	1.14e-07	ENSG00000149571	KIRREL3	1.39e-07	TRUE	<0.01
rs7284558;rs28695882;rs56403962	1	chr22:48885272-49246724	1.27e-07	ENSG00000219438	FAM19A5	1.41e-07	TRUE	<0.01
rs76577427;rs2761438;rs6689641	2	chr1:110693108-110825722	7.78e-18	ENSG00000197106	SLC6A17	1.41e-07	TRUE	<0.01
rs631287	1	chr9:128199672-128469513	2.52e-09	ENSG00000119487	MAPKAP1	1.41e-07	TRUE	<0.01
rs12151248;rs118040169;rs7408934;rs56252104;rs79105431;rs62109939;rs11775;rs9941452	7	chr19:13080432-13265716	3.81e-11	ENSG00000008441	NFIX	1.42e-07	TRUE	<0.01
rs533241	3	chr2:230222345-230877825	7.92e-07	ENSG00000187957	DNER	1.44e-07	FALSE	<0.01
rs12571549;rs7899270;rs60726488	3	chr10:111624524-111895323	1.45e-13	ENSG00000148700	ADD3	1.47e-07	TRUE	<0.01
rs7898790	1	chr10:108336940-108924292	3.33e-06	ENSG00000108018	SORCS1	1.48e-07	TRUE	<0.01
rs74453875;rs62260764;rs11709573;rs9859556;rs3172494;rs74473238;rs144519232;rs55786114;rs2624818;rs71325001;rs34037363;rs55689339;rs141260127;rs112269639;rs11716398;rs190848966;rs55935606;rs62263033;rs116033001;rs77719387;rs140021702;rs6780575;rs3731507;rs116656374;rs62248598;rs182355396;rs1264194;rs73083140;rs113893318;rs116192940;rs138484388;rs736471;rs11720093;rs140269757;rs114182490;rs7308914…	107	chr3:46899362-52090566	4.61e-82	ENSG00000145029	NICN1	1.49e-07	FALSE	<0.01
rs6812533	2	chr4:39640760-39784412	4.85e-11	ENSG00000078140	UBE2K	1.55e-07	TRUE	<0.01
rs2003111	1	chr10:87359312-88126250	7.71e-06	ENSG00000182771	GRID1	1.56e-07	TRUE	<0.01
rs10922845	1	chr1:90457722-90494097	5.25e-08	ENSG00000162664	ZNF326	1.67e-07	TRUE	<0.01
rs9924031	1	chr16:19179571-19279652	1.81e-10	ENSG00000103528	SYT17	1.68e-07	TRUE	<0.01
rs10496091;rs116386746;rs28551472;rs56949301;rs145281763;rs11693744	9	chr2:60983365-61765761	3.71e-17	ENSG00000082898	XPO1	1.7e-07	TRUE	<0.01
rs4925109;rs140786034	3	chr17:17584787-17740325	1.91e-10	ENSG00000108557	RAI1	1.76e-07	TRUE	<0.01
rs12790196;rs2508441	9	chr11:57364860-57587018	3.29e-11	ENSG00000166793	YPEL4	1.82e-07	FALSE	<0.01
rs730384;rs7154563	9	chr14:74872596-75370448	9.38e-13	ENSG00000119596	YLPM1	1.9e-07	FALSE	<0.01
rs590013;rs533123	2	chr1:29063133-29190208	2.47e-11	ENSG00000198492	YTHDF2	1.93e-07	FALSE	<0.01
rs2962378;rs2367823	1	chr5:90664541-90679176	4.3e-09	ENSG00000113369	ARRDC3	1.93e-07	TRUE	<0.01
rs3862789;rs72962169;rs7125221	3	chr11:72287185-72505213	1.26e-19	ENSG00000186642	PDE2A	1.96e-07	TRUE	<0.01
rs12622368	1	chr2:137523115-138435287	5.16e-06	ENSG00000144229	THSD7B	1.97e-07	TRUE	<0.01
rs785499	8	chr1:46049518-46642160	2.02e-07	ENSG00000086015	MAST2	1.98e-07	FALSE	<0.01
rs590013;rs533123	2	chr1:29063133-29190208	2.47e-11	ENSG00000116329	OPRD1	2.07e-07	TRUE	<0.01
rs6573559;rs6573552	11	chr14:64319683-65056098	3.11e-12	ENSG00000054654	SYNE2	2.08e-07	FALSE	<0.01
rs1544;rs59300999;rs2833504	3	chr21:33025906-33104431	1.76e-09	ENSG00000156304	SCAF4	2.13e-07	TRUE	<0.01
rs11786879	2	chr8:41510739-41909508	1.31e-07	ENSG00000083168	KAT6A	2.13e-07	FALSE	<0.01
rs7108020;rs12574281;rs78833645;rs12418096;rs2512652	1	chr11:131240373-132206716	3.91e-14	ENSG00000182667	NTM	2.14e-07	TRUE	<0.01
rs12409811;rs61804837	10	chr1:153777201-154243986	1.1e-07	ENSG00000143569	UBAP2L	2.22e-07	FALSE	<0.01
rs13266287	2	chr8:17780349-17942494	1.75e-08	ENSG00000078674	PCM1	2.22e-07	FALSE	<0.01
rs115024859	1	chr3:23847394-23932807	6.17e-06	ENSG00000170142	UBE2E1	2.32e-07	TRUE	<0.01
rs9556958;rs9513416;rs2772357	3	chr13:98795434-99230194	5.96e-15	ENSG00000152767	FARP1	2.32e-07	FALSE	<0.01
rs4895650;rs951573	1	chr6:144606837-145174170	5.31e-11	ENSG00000152818	UTRN	2.35e-07	TRUE	<0.01
rs6459818;rs4716882	1	chr7:157331750-158380480	1.13e-06	ENSG00000155093	PTPRN2	2.39e-07	FALSE	<0.01
rs1717204;rs6792805;rs7432975;rs73176056;rs1102594	2	chr3:118619404-118864915	1.2e-10	ENSG00000144847	IGSF11	2.45e-07	FALSE	<0.01
rs646007;rs590414	2	chr11:105480721-105893130	2.37e-07	ENSG00000152578	GRIA4	2.56e-07	FALSE	<0.01
rs7182216;rs146705544	2	chr15:84115980-84708594	1.1e-08	ENSG00000140600	SH3GL3	2.56e-07	FALSE	<0.01
rs56405138;rs7664299;rs28567740	3	chr4:165997256-166264312	1.31e-12	ENSG00000109466	KLHL2	2.71e-07	TRUE	<0.01
rs7299842;rs11043298;rs10773208;rs12810587;rs78440611;rs11058322;rs10773002;rs34436758;rs10773515;rs12811983;rs112365238;rs61955089;rs146898200	26	chr12:122457328-124083116	2.5e-30	ENSG00000150967	ABCB9	2.74e-07	FALSE	<0.01
rs146671954	3	chr9:136890561-136933657	2.53e-07	ENSG00000169925	BRD3	2.79e-07	TRUE	<0.01
rs12051987;rs8085561	1	chr18:5143672-5197255	2.15e-07	ENSG00000231824	C18orf42	2.87e-07	TRUE	<0.01
rs4537554;rs12125619	1	chr1:210111538-210337636	7.18e-07	ENSG00000143469	SYT14	2.9e-07	FALSE	<0.01
rs117120958	4	chr9:5881596-6066714	1.86e-06	ENSG00000137040	RANBP6	2.94e-07	FALSE	<0.01
rs9613472	1	chr22:28144265-28197486	3.98e-06	ENSG00000169184	MN1	2.96e-07	TRUE	<0.01
rs4685448	2	chr3:237441-451090	1.07e-06	ENSG00000134121	CHL1	2.97e-07	FALSE	<0.01
rs7211055;rs12940055;rs72848751	16	chr17:61600695-62050278	5.82e-07	ENSG00000136485	DCAF7	3.04e-07	TRUE	<0.01
rs11588857;rs884108	4	chr1:204391756-204654861	4.45e-31	ENSG00000198625	MDM4	3.12e-07	FALSE	<0.01
rs6559728	1	chr9:85857905-86153461	8.46e-06	ENSG00000172159	FRMD3	3.33e-07	TRUE	<0.01
rs1901018;rs150821390;rs72855101;rs7583892;rs150991676;rs7595461	3	chr2:23608088-24227779	3.22e-07	ENSG00000119778	ATAD2B	3.35e-07	TRUE	<0.01
rs4766424	2	chr12:1901123-2028002	2.47e-11	ENSG00000166159	LRTM2	3.43e-07	TRUE	<0.01
rs9655780;rs2470966;rs4730020;rs17706792;rs16869996;rs6961668	6	chr7:103969104-105039755	3.7e-16	ENSG00000239569	-	3.43e-07	TRUE	<0.01
rs11235803	4	chr11:72975550-73309234	1.4e-06	ENSG00000110237	ARHGEF17	3.47e-07	FALSE	<0.01
rs17110109	4	chr12:54624724-54745633	1.47e-10	ENSG00000094916	CBX5	3.48e-07	TRUE	<0.01
rs1467737;rs10818649	1	chr9:124964856-124991905	3.52e-09	ENSG00000106852	LHX6	3.5e-07	TRUE	<0.01
rs6440854	1	chr3:152880029-152886265	7.39e-07	ENSG00000181467	RAP2B	3.54e-07	TRUE	<0.01
rs9306268	6	chr22:31795509-32303001	3.55e-06	ENSG00000184708	EIF4ENIF1	3.55e-07	FALSE	<0.01
rs9373384;rs9496638;rs72988638	5	chr6:143381633-143832827	1.64e-07	ENSG00000218896	-	3.56e-07	TRUE	<0.01
rs12446456	4	chr16:4846969-4987136	7.96e-06	ENSG00000067836	ROGDI	3.58e-07	FALSE	<0.01
rs6121037	11	chr20:34042985-34547394	1.32e-07	ENSG00000244462	RBM12	3.66e-07	FALSE	<0.01
rs74453875;rs62260764;rs11709573;rs9859556;rs3172494;rs74473238;rs144519232;rs55786114;rs2624818;rs71325001;rs34037363;rs55689339;rs141260127;rs112269639;rs11716398;rs190848966;rs55935606;rs62263033;rs116033001;rs77719387;rs140021702;rs6780575;rs3731507;rs116656374;rs62248598;rs182355396;rs1264194;rs73083140;rs113893318;rs116192940;rs138484388;rs736471;rs11720093;rs140269757;rs114182490;rs7308914…	107	chr3:46899362-52090566	4.61e-82	ENSG00000181555	SETD2	3.85e-07	FALSE	<0.01
rs8019235;rs10130443;rs34074136	2	chr14:42057064-42373752	7.99e-07	ENSG00000165379	LRFN5	3.86e-07	FALSE	<0.01
rs2301586	6	chr22:29601840-29819168	2.01e-06	ENSG00000182944	EWSR1	3.98e-07	FALSE	<0.01
rs10761202;rs111370527	4	chr9:95947198-96328397	4.28e-10	ENSG00000165238	WNK2	4e-07	TRUE	<0.01
rs74615093;rs77295380	12	chr16:68877509-69419859	3.67e-08	ENSG00000132604	TERF2	4.03e-07	FALSE	<0.01
rs1051860;rs71414197	5	chr14:58466453-58840605	3.29e-08	ENSG00000131966	ACTR10	4.07e-07	FALSE	<0.01
rs6546856	4	chr2:73612886-73912703	2.52e-07	ENSG00000163016	ALMS1P	4.13e-07	FALSE	<0.01
rs9683585;rs1203765;rs11248108	5	chr4:2271309-2758103	2.46e-09	ENSG00000159733	ZFYVE28	4.14e-07	FALSE	<0.01
rs62007304;rs113274654;rs34080199	2	chr15:77400471-77777949	1.8e-08	ENSG00000140382	HMG20A	4.17e-07	TRUE	<0.01
rs11545169	5	chr3:183852826-184402546	1.55e-07	ENSG00000114867	EIF4G1	4.21e-07	FALSE	<0.01
rs17742342;rs12053365	3	chr2:148602086-149275805	1.59e-11	ENSG00000204406	MBD5	4.38e-07	FALSE	<0.01
rs74453875;rs62260764;rs11709573;rs9859556;rs3172494;rs74473238;rs144519232;rs55786114;rs2624818;rs71325001;rs34037363;rs55689339;rs141260127;rs112269639;rs11716398;rs190848966;rs55935606;rs62263033;rs116033001;rs77719387;rs140021702;rs6780575;rs3731507;rs116656374;rs62248598;rs182355396;rs1264194;rs73083140;rs113893318;rs116192940;rs138484388;rs736471;rs11720093;rs140269757;rs114182490;rs7308914…	107	chr3:46899362-52090566	4.61e-82	ENSG00000076201	PTPN23	4.38e-07	TRUE	<0.01
rs117340654;rs642803;rs585557;rs76878669;rs35947684;rs118151305;rs10896139;rs116864252;rs4930188;rs35111506;rs72939178;rs479018;rs7127808;rs7120517;rs118011160;rs117309574	93	chr11:65029233-67407031	3.1e-17	ENSG00000172531	PPP1CA	4.53e-07	FALSE	<0.01
rs2007655	1	chr10:34398488-35104253	8.64e-10	ENSG00000148498	PARD3	4.53e-07	TRUE	<0.01
rs2183924;rs10968219	1	chr9:27948076-28670283	1.24e-07	ENSG00000174482	LINGO2	4.54e-07	FALSE	<0.01
rs4500930;rs74747621;rs12467175;rs182471363;rs77974750	1	chr2:228844666-229046361	1.67e-13	ENSG00000153820	SPHKAP	4.8e-07	TRUE	<0.01
rs6475368	1	chr9:19515978-19786926	4.28e-06	ENSG00000155886	SLC24A2	4.84e-07	TRUE	<0.01
rs72667460;rs55675587;rs17440885;rs149869656;rs12751825;rs6588157	3	chr1:65886248-67213982	2.44e-10	ENSG00000118473	SGIP1	4.99e-07	TRUE	<0.01
rs7983579;rs72656488	1	chr13:107142093-107187462	8.23e-07	ENSG00000125266	EFNB2	5.51e-07	TRUE	<0.01
rs17064399	1	chr13:43787654-44361044	1.59e-06	ENSG00000120658	ENOX1	5.51e-07	FALSE	<0.01
rs2954114;rs112279125	5	chr12:122150658-122326517	9.4e-09	ENSG00000212694	-	5.52e-07	FALSE	<0.01
rs10074050	3	chr5:56111401-56267502	7.54e-07	ENSG00000155545	MIER3	5.52e-07	FALSE	<0.01
rs13018640;rs71413877;rs72819118;rs192225848;rs72821189;rs10166286;rs10168615;rs17023131;rs79430745;rs6715321;rs4851263;rs4851338;rs13009915;rs1346620;rs77826402;rs62147651;rs62156361;rs6733011;rs11690621;rs116398129;rs111377325;rs11690494;rs744145	19	chr2:99061317-101034118	1.05e-50	ENSG00000135945	REV1	5.78e-07	TRUE	<0.01
rs74453875;rs62260764;rs11709573;rs9859556;rs3172494;rs74473238;rs144519232;rs55786114;rs2624818;rs71325001;rs34037363;rs55689339;rs141260127;rs112269639;rs11716398;rs190848966;rs55935606;rs62263033;rs116033001;rs77719387;rs140021702;rs6780575;rs3731507;rs116656374;rs62248598;rs182355396;rs1264194;rs73083140;rs113893318;rs116192940;rs138484388;rs736471;rs11720093;rs140269757;rs114182490;rs7308914…	107	chr3:46899362-52090566	4.61e-82	ENSG00000173473	SMARCC1	5.95e-07	FALSE	<0.01
rs4384309;rs78377382	1	chr10:132890654-133109984	4.89e-13	ENSG00000176769	TCERG1L	6.08e-07	TRUE	<0.01
rs2100249;rs35624276;rs113615161;rs10953766	2	chr7:113726382-114659256	1.91e-09	ENSG00000128573	FOXP2	6.17e-07	TRUE	<0.01
rs74453875;rs62260764;rs11709573;rs9859556;rs3172494;rs74473238;rs144519232;rs55786114;rs2624818;rs71325001;rs34037363;rs55689339;rs141260127;rs112269639;rs11716398;rs190848966;rs55935606;rs62263033;rs116033001;rs77719387;rs140021702;rs6780575;rs3731507;rs116656374;rs62248598;rs182355396;rs1264194;rs73083140;rs113893318;rs116192940;rs138484388;rs736471;rs11720093;rs140269757;rs114182490;rs7308914…	107	chr3:46899362-52090566	4.61e-82	ENSG00000172046	USP19	6.44e-07	FALSE	<0.01
rs3803847	1	chr17:10725792-10741418	2.91e-06	ENSG00000233670	PIRT	6.64e-07	TRUE	<0.01
rs12761761;rs7915610	2	chr10:133747955-133795435	4.79e-20	ENSG00000175470	PPP2R2D	6.72e-07	FALSE	<0.01
rs7603132;rs73914230;rs115452135	1	chr2:5832799-5841516	1.2e-14	ENSG00000176887	SOX11	6.89e-07	TRUE	<0.01
rs12891042;rs8016504;rs1955512	2	chr14:32798479-34273382	1.02e-10	ENSG00000151320	AKAP6	6.93e-07	FALSE	<0.01
rs2740795	5	chr8:91803778-92099323	7.71e-10	ENSG00000155099	TMEM55A	6.98e-07	FALSE	<0.01
rs4146926	1	chr4:164245113-164265984	7.44e-08	ENSG00000164128	NPY1R	7.05e-07	FALSE	<0.01
rs6682652	1	chr1:202995626-203047864	9.87e-06	ENSG00000143847	PPFIA4	7.22e-07	FALSE	<0.01
rs113054910	2	chr3:36421836-36781352	2.18e-06	ENSG00000163673	DCLK3	7.32e-07	FALSE	<0.01
rs6509303	3	chr19:47341423-47508323	1.5e-06	ENSG00000252071	-	7.35e-07	TRUE	<0.01
rs7928017;rs1107162;rs112086348;rs77028828	2	chr11:113185251-113346413	1.43e-11	ENSG00000149295	DRD2	7.53e-07	TRUE	<0.01
rs74415461;rs118124826;rs35754755;rs4785577;rs9673820;rs9932312;rs12917772;rs8047204	26	chr16:89154783-90142338	6.25e-12	ENSG00000204991	SPIRE2	7.59e-07	FALSE	<0.01
rs13422673;rs80077995;rs799810;rs707115;rs707078	2	chr2:154728426-155714863	6.48e-15	ENSG00000144278	GALNT13	7.74e-07	FALSE	<0.01
rs12461072	6	chr19:18208603-18359010	8.98e-07	ENSG00000105650	PDE4C	7.74e-07	FALSE	<0.01
rs117340654;rs642803;rs585557;rs76878669;rs35947684;rs118151305;rs10896139;rs116864252;rs4930188;rs35111506;rs72939178;rs479018;rs7127808;rs7120517;rs118011160;rs117309574	93	chr11:65029233-67407031	3.1e-17	ENSG00000174516	PELI3	7.78e-07	FALSE	<0.01
rs74453875;rs62260764;rs11709573;rs9859556;rs3172494;rs74473238;rs144519232;rs55786114;rs2624818;rs71325001;rs34037363;rs55689339;rs141260127;rs112269639;rs11716398;rs190848966;rs55935606;rs62263033;rs116033001;rs77719387;rs140021702;rs6780575;rs3731507;rs116656374;rs62248598;rs182355396;rs1264194;rs73083140;rs113893318;rs116192940;rs138484388;rs736471;rs11720093;rs140269757;rs114182490;rs7308914…	107	chr3:46899362-52090566	4.61e-82	ENSG00000164086	DUSP7	7.92e-07	FALSE	<0.01
rs262986	2	chr3:183415606-183543382	1.01e-06	ENSG00000163872	YEATS2	8.18e-07	TRUE	<0.01
rs10746127	2	chr12:109038885-109251366	1.61e-06	ENSG00000110880	CORO1C	8.41e-07	FALSE	<0.01
rs12285074	5	chr11:116714118-117103241	5.11e-12	ENSG00000160584	SIK3	8.46e-07	FALSE	<0.01
rs7523793	1	chr1:242251689-242687998	3.3e-07	ENSG00000180287	PLD5	8.68e-07	FALSE	<0.01
rs7502541;rs9902820;rs62082093	14	chr17:56422539-57353322	3.9e-07	ENSG00000108389	MTMR4	8.81e-07	FALSE	<0.01
rs77073818	3	chr1:115247090-115323306	1.79e-06	ENSG00000009307	CSDE1	8.88e-07	TRUE	<0.01
rs7299842;rs11043298;rs10773208;rs12810587;rs78440611;rs11058322;rs10773002;rs34436758;rs10773515;rs12811983;rs112365238;rs61955089;rs146898200	26	chr12:122457328-124083116	2.5e-30	ENSG00000175727	MLXIP	9.06e-07	FALSE	<0.01
rs2406253;rs10241492;rs4134932	17	chr7:99699172-100092422	3.58e-14	ENSG00000221838	AP4M1	9.21e-07	FALSE	<0.01
rs58125559;rs35773761;rs73497522	5	chr16:1560428-1820318	1.34e-07	ENSG00000007545	CRAMP1L	9.63e-07	FALSE	<0.01
rs757436	1	chr19:3804022-3869027	6.23e-07	ENSG00000105278	ZFR2	9.67e-07	FALSE	<0.01
rs4925065	2	chr17:19807788-20222339	2.59e-08	ENSG00000108599	AKAP10	9.77e-07	FALSE	<0.01
rs11663602;rs12970264;rs62103198;rs611517	8	chr18:77623668-78005429	9.27e-17	ENSG00000101544	ADNP2	1.02e-06	FALSE	<0.01
rs12149425;rs7184847	1	chr16:76311176-76593135	2.32e-07	ENSG00000152910	CNTNAP4	1.07e-06	TRUE	<0.01
rs115984727	1	chr5:132086509-132142933	9.83e-06	ENSG00000164402	SEPT8	1.08e-06	TRUE	<0.01
rs2764684;rs852771;rs548897;rs1213769;rs7537039;rs72676940	2	chr1:57460451-59012406	9.99e-15	ENSG00000173406	DAB1	1.08e-06	TRUE	<0.01
rs117340654;rs642803;rs585557;rs76878669;rs35947684;rs118151305;rs10896139;rs116864252;rs4930188;rs35111506;rs72939178;rs479018;rs7127808;rs7120517;rs118011160;rs117309574	93	chr11:65029233-67407031	3.1e-17	ENSG00000175573	C11orf68	1.09e-06	FALSE	<0.01
rs118093058;rs117862461;rs4034	31	chr11:62201016-63177766	3.78e-12	ENSG00000162236	STX5	1.15e-06	FALSE	<0.01
rs16983844;rs3810478	2	chr20:62189439-62258394	1.29e-07	ENSG00000101216	GMEB2	1.15e-06	FALSE	<0.01
rs10937590	2	chr3:193119866-193415612	1.62e-06	ENSG00000198836	OPA1	1.15e-06	FALSE	<0.01
rs3897821;rs10927053;rs2994326;rs78631843;rs10927006;rs114025835;rs10803136;rs10926940	3	chr1:243219131-244014381	3.58e-25	ENSG00000214837	-	1.21e-06	TRUE	<0.01
rs12981405	6	chr19:19375174-19657468	2.75e-09	ENSG00000129933	MAU2	1.27e-06	FALSE	<0.01
rs11732160;rs74944857;rs10019169;rs7665356	2	chr4:66185281-66563747	1.46e-11	ENSG00000250846	-	1.27e-06	TRUE	<0.01
rs13214325	2	chr6:20534688-21232635	9.33e-06	ENSG00000145996	CDKAL1	1.32e-06	FALSE	<0.01
rs74453875;rs62260764;rs11709573;rs9859556;rs3172494;rs74473238;rs144519232;rs55786114;rs2624818;rs71325001;rs34037363;rs55689339;rs141260127;rs112269639;rs11716398;rs190848966;rs55935606;rs62263033;rs116033001;rs77719387;rs140021702;rs6780575;rs3731507;rs116656374;rs62248598;rs182355396;rs1264194;rs73083140;rs113893318;rs116192940;rs138484388;rs736471;rs11720093;rs140269757;rs114182490;rs7308914…	107	chr3:46899362-52090566	4.61e-82	ENSG00000180929	GPR62	1.35e-06	FALSE	<0.01
rs740980	1	chr14:73075742-73360809	7.5e-07	ENSG00000205683	DPF3	1.4e-06	TRUE	<0.01
rs7299842;rs11043298;rs10773208;rs12810587;rs78440611;rs11058322;rs10773002;rs34436758;rs10773515;rs12811983;rs112365238;rs61955089;rs146898200	26	chr12:122457328-124083116	2.5e-30	ENSG00000139697	SBNO1	1.45e-06	TRUE	<0.01
rs17604349;rs62051146;rs17668674;rs35999374;rs9927049;rs138696382;rs34113301;rs62055046	21	chr16:70721342-72210777	2.36e-12	ENSG00000172137	CALB2	1.48e-06	TRUE	<0.01
rs6917154	2	chr6:166822852-167319939	2.55e-09	ENSG00000071242	RPS6KA2	1.49e-06	FALSE	<0.01
rs11724690;rs4515204;rs35075923	1	chr4:186506598-186877806	2.08e-09	ENSG00000154556	SORBS2	1.53e-06	TRUE	<0.01
rs3751331;rs138569349;rs1148547	20	chr12:57984957-58351052	1.75e-11	ENSG00000166908	PIP4K2C	1.55e-06	TRUE	<0.01
rs115049817	1	chr3:134316643-134979309	9.83e-06	ENSG00000154928	EPHB1	1.55e-06	FALSE	<0.01
rs9903071;rs34400969	4	chr17:3822869-4167274	3.37e-07	ENSG00000185722	ANKFY1	1.66e-06	FALSE	<0.01
rs11030102;rs11030084	5	chr11:27387508-27899195	4.6e-10	ENSG00000148943	LIN7C	1.71e-06	FALSE	<0.01
rs9611597;rs9607859;rs4822112;rs148537066;rs2899355;rs2142695	35	chr22:41165634-42828401	2.3e-08	ENSG00000229891	-	1.76e-06	TRUE	<0.01
rs61757207	11	chr16:70147529-70694585	1.27e-08	ENSG00000223496	EXOSC6	1.77e-06	FALSE	<0.01
rs62580853	3	chr9:129622944-129985445	2.97e-06	ENSG00000177125	ZBTB34	1.78e-06	FALSE	<0.01
rs9655780;rs2470966;rs4730020;rs17706792;rs16869996;rs6961668	6	chr7:103969104-105039755	3.7e-16	ENSG00000187416	LHFPL3	1.79e-06	TRUE	<0.01
rs3778709	1	chr7:36893961-37488852	2.55e-06	ENSG00000155849	ELMO1	1.84e-06	FALSE	<0.01
rs13143771;rs318518	2	chr4:129730779-130014764	9.43e-08	ENSG00000077684	PHF17	1.91e-06	TRUE	<0.01
rs721579;rs56319902;rs538628;rs143699161;rs11657021	14	chr17:43340488-44896082	5.81e-33	ENSG00000120088	CRHR1	1.92e-06	FALSE	<0.01
rs4778058;rs8034960	1	chr15:93425937-93571237	4.92e-11	ENSG00000173575	CHD2	1.95e-06	TRUE	<0.01
rs7299842;rs11043298;rs10773208;rs12810587;rs78440611;rs11058322;rs10773002;rs34436758;rs10773515;rs12811983;rs112365238;rs61955089;rs146898200	26	chr12:122457328-124083116	2.5e-30	ENSG00000130779	CLIP1	1.98e-06	FALSE	<0.01
rs6956484	3	chr7:27565061-28220362	2.69e-07	ENSG00000153814	JAZF1	2.04e-06	FALSE	<0.01
rs13252551	1	chr8:15274724-15624158	3.71e-07	ENSG00000104723	TUSC3	2.1e-06	TRUE	<0.01
rs17604349;rs62051146;rs17668674;rs35999374;rs9927049;rs138696382;rs34113301;rs62055046	21	chr16:70721342-72210777	2.36e-12	ENSG00000224470	ATXN1L	2.1e-06	FALSE	<0.01
rs2332179;rs11720985;rs16833165	8	chr3:121902530-122294050	2.76e-09	ENSG00000114030	KPNA1	2.11e-06	TRUE	<0.01
rs7299842;rs11043298;rs10773208;rs12810587;rs78440611;rs11058322;rs10773002;rs34436758;rs10773515;rs12811983;rs112365238;rs61955089;rs146898200	26	chr12:122457328-124083116	2.5e-30	ENSG00000111011	RSRC2	2.11e-06	FALSE	<0.01
rs7313056	5	chr12:109826524-110035067	1.12e-06	ENSG00000151148	UBE3B	2.19e-06	TRUE	<0.01
rs6704768;rs35811586;rs11678345	5	chr2:233562009-233877982	1.84e-16	ENSG00000204120	GIGYF2	2.24e-06	TRUE	<0.01
rs4943444	1	chr13:37583449-37633850	5.67e-06	ENSG00000102710	FAM48A	2.27e-06	TRUE	<0.01
rs283271	1	chr20:53092136-53267710	9.29e-07	ENSG00000101134	DOK5	2.29e-06	TRUE	<0.01
rs7729926;rs72801644	13	chr5:137203480-137772717	1.16e-06	ENSG00000120709	FAM53C	2.31e-06	FALSE	<0.01
rs7502541;rs9902820;rs62082093	14	chr17:56422539-57353322	3.9e-07	ENSG00000153982	GDPD1	2.59e-06	FALSE	<0.01
rs11789013	1	chr9:109625378-109775915	1.47e-10	ENSG00000148143	ZNF462	2.64e-06	TRUE	<0.01
rs702606;rs2607505	2	chr5:52856463-53606412	9.19e-09	ENSG00000185305	ARL15	2.64e-06	FALSE	<0.01
rs7449561;rs150475362;rs7752247;rs1938060	1	chr6:64429876-66417118	9.73e-10	ENSG00000188107	EYS	2.65e-06	TRUE	<0.01
rs112246428	3	chr6:35441374-35696360	1.61e-07	ENSG00000112041	TULP1	2.65e-06	TRUE	<0.01
rs4984682	16	chr16:616995-818865	1.82e-16	ENSG00000140983	RHOT2	2.68e-06	FALSE	<0.01
rs4925065	2	chr17:19807788-20222339	2.59e-08	ENSG00000128487	SPECC1	2.73e-06	TRUE	<0.01
rs2408359	1	chr13:51928213-52028400	5.27e-06	ENSG00000102786	INTS6	2.85e-06	FALSE	<0.01
rs737945;rs41282553;rs7288964	10	chr22:30116073-31521442	3.73e-16	ENSG00000184792	OSBP2	2.94e-06	FALSE	<0.01
rs7782519	1	chr7:111366168-111846466	7.18e-07	ENSG00000128512	DOCK4	3.03e-06	TRUE	<0.01
rs74944275;rs187580;rs76177300;rs1394820	7	chr5:101569690-102614361	4.44e-11	ENSG00000181751	C5orf30	3.25e-06	TRUE	<0.01
rs6956283	1	chr7:98625061-98741723	6.44e-10	ENSG00000198742	SMURF1	3.25e-06	TRUE	<0.01
rs74615093;rs77295380	12	chr16:68877509-69419859	3.67e-08	ENSG00000200164	-	3.28e-06	FALSE	<0.01
rs4984682	16	chr16:616995-818865	1.82e-16	ENSG00000228201	-	3.43e-06	FALSE	<0.01
rs74453875;rs62260764;rs11709573;rs9859556;rs3172494;rs74473238;rs144519232;rs55786114;rs2624818;rs71325001;rs34037363;rs55689339;rs141260127;rs112269639;rs11716398;rs190848966;rs55935606;rs62263033;rs116033001;rs77719387;rs140021702;rs6780575;rs3731507;rs116656374;rs62248598;rs182355396;rs1264194;rs73083140;rs113893318;rs116192940;rs138484388;rs736471;rs11720093;rs140269757;rs114182490;rs7308914…	107	chr3:46899362-52090566	4.61e-82	ENSG00000114316	USP4	3.5e-06	TRUE	<0.01
rs1689510;rs118067691;rs80223410	8	chr12:56390964-56557280	1.35e-38	ENSG00000092841	MYL6	3.64e-06	FALSE	<0.01
rs17565975	1	chr11:111473115-111601577	5.54e-14	ENSG00000170145	SIK2	3.68e-06	FALSE	<0.01
rs6800637;rs13061596;rs1398651	1	chr3:17199899-18486309	1.16e-06	ENSG00000131374	TBC1D5	3.68e-06	TRUE	<0.01
rs2220926	1	chr18:59000988-59223006	1.84e-11	ENSG00000101542	CDH20	3.72e-06	TRUE	<0.01
rs11871429;rs73984100;rs34257140;rs78954500;rs139296776	10	chr17:42733762-43045644	2.52e-14	ENSG00000131095	GFAP	3.83e-06	FALSE	<0.01
rs9611597;rs9607859;rs4822112;rs148537066;rs2899355;rs2142695	35	chr22:41165634-42828401	2.3e-08	ENSG00000100380	ST13	3.85e-06	FALSE	<0.01
rs55923193	1	chr7:79763271-79848718	8.68e-07	ENSG00000127955	GNAI1	3.88e-06	TRUE	<0.01
rs111589071	1	chr16:1359164-1377019	3.79e-06	ENSG00000103275	UBE2I	3.88e-06	TRUE	<0.01
rs6545559;rs55812813	1	chr2:56411258-56613308	3.63e-07	ENSG00000055813	CCDC85A	3.89e-06	TRUE	<0.01
rs3812281;rs62479581;rs6467597;rs116934009	2	chr7:135046547-135333505	2.7e-15	ENSG00000080802	CNOT4	3.9e-06	TRUE	<0.01
rs7158218	4	chr14:73704205-74025651	5.63e-09	ENSG00000133961	NUMB	3.95e-06	TRUE	<0.01
rs11592299;rs3781339;rs12774577;rs10748841;rs76957677;rs2986016;rs1538205;rs146952142;rs138873813;rs3740409	22	chr10:104221149-105615301	8.69e-13	ENSG00000138175	ARL3	4.04e-06	FALSE	<0.01
rs6953350;rs1026196	1	chr7:131808091-132333447	1.82e-07	ENSG00000221866	PLXNA4	4.04e-06	TRUE	<0.01
rs1940038	1	chr11:117298489-117688240	3.98e-06	ENSG00000177103	DSCAML1	4.08e-06	FALSE	<0.01
rs4919624;rs73344830;rs118079769;rs11190955;rs11596387;rs61874089;rs11191206;rs117104675;rs3781292;rs118059379;rs75709864	21	chr10:103113820-104192418	1e-32	ENSG00000120029	C10orf76	4.13e-06	TRUE	<0.01
rs61757207	11	chr16:70147529-70694585	1.27e-08	ENSG00000157350	ST3GAL2	4.13e-06	FALSE	<0.01
rs1476646	1	chr16:72816784-73093597	9.33e-07	ENSG00000140836	ZFHX3	4.2e-06	TRUE	<0.01
rs118134876;rs12234369;rs4532508	2	chr7:11232993-11871824	1.5e-13	ENSG00000005108	THSD7A	4.26e-06	TRUE	<0.01
rs6924023	7	chr6:169857307-170202969	5.17e-11	ENSG00000130024	PHF10	4.29e-06	FALSE	<0.01
rs34616566	2	chr4:170314426-170644824	4.2e-07	ENSG00000137601	NEK1	4.34e-06	FALSE	<0.01
rs4639354	1	chr6:136172834-136516712	6.93e-06	ENSG00000171408	PDE7B	4.38e-06	FALSE	<0.01
rs7299842;rs11043298;rs10773208;rs12810587;rs78440611;rs11058322;rs10773002;rs34436758;rs10773515;rs12811983;rs112365238;rs61955089;rs146898200	26	chr12:122457328-124083116	2.5e-30	ENSG00000110987	BCL7A	4.4e-06	FALSE	<0.01
rs968384	1	chr22:45277042-45405880	6.75e-06	ENSG00000056487	PHF21B	4.44e-06	TRUE	<0.01
rs144760360	1	chr16:12995455-13334272	5.37e-06	ENSG00000237515	SHISA9	4.52e-06	TRUE	<0.01
rs117340654;rs642803;rs585557;rs76878669;rs35947684;rs118151305;rs10896139;rs116864252;rs4930188;rs35111506;rs72939178;rs479018;rs7127808;rs7120517;rs118011160;rs117309574	93	chr11:65029233-67407031	3.1e-17	ENSG00000173227	SYT12	4.63e-06	TRUE	<0.01
rs1789118	1	chr18:74690783-74845639	1.67e-07	ENSG00000197971	MBP	4.75e-06	TRUE	<0.01
rs301793;rs11121155;rs11589090;rs66504733	2	chr1:8377886-8877702	1.44e-16	ENSG00000162426	SLC45A1	4.86e-06	TRUE	<0.01
rs73219806	2	chr8:26149007-26363152	1.97e-08	ENSG00000104765	BNIP3L	5.03e-06	TRUE	<0.01
rs11871429;rs73984100;rs34257140;rs78954500;rs139296776	10	chr17:42733762-43045644	2.52e-14	ENSG00000224911	-	5.04e-06	FALSE	<0.01
rs133074	1	chr22:41074754-41078818	4.07e-06	ENSG00000128285	MCHR1	5.08e-06	TRUE	<0.01
rs2023016	2	chr6:161768452-163736524	4.91e-10	ENSG00000185345	PARK2	5.1e-06	FALSE	<0.01
rs10120857	1	chr9:13105703-13279589	2.35e-06	ENSG00000107186	MPDZ	5.1e-06	TRUE	<0.01
rs737945;rs41282553;rs7288964	10	chr22:30116073-31521442	3.73e-16	ENSG00000253352	TUG1	5.11e-06	FALSE	<0.01
rs42302	4	chr5:74632154-75013313	5.96e-09	ENSG00000113163	COL4A3BP	5.3e-06	FALSE	<0.01
rs2314338;rs118101047;rs507671;rs112199584	9	chr17:38278790-38613983	9.5e-09	ENSG00000108349	CASC3	5.34e-06	FALSE	<0.01
rs117340654;rs642803;rs585557;rs76878669;rs35947684;rs118151305;rs10896139;rs116864252;rs4930188;rs35111506;rs72939178;rs479018;rs7127808;rs7120517;rs118011160;rs117309574	93	chr11:65029233-67407031	3.1e-17	ENSG00000239306	RBM14	5.43e-06	FALSE	<0.01
rs7126413	2	chr11:120195838-120360645	1.7e-06	ENSG00000196914	ARHGEF12	5.48e-06	TRUE	<0.01
rs12028010;rs2364544;rs11209894;rs72665647	5	chr1:41445007-41849262	9.78e-23	ENSG00000010803	SCMH1	5.54e-06	FALSE	<0.01
rs1064193	5	chr11:118964564-119033360	3.39e-07	ENSG00000172350	ABCG4	5.6e-06	FALSE	<0.01
rs6881581	10	chr5:140710252-140998622	1.08e-10	ENSG00000242419	PCDHGC4	5.67e-06	FALSE	<0.01
rs74453875;rs62260764;rs11709573;rs9859556;rs3172494;rs74473238;rs144519232;rs55786114;rs2624818;rs71325001;rs34037363;rs55689339;rs141260127;rs112269639;rs11716398;rs190848966;rs55935606;rs62263033;rs116033001;rs77719387;rs140021702;rs6780575;rs3731507;rs116656374;rs62248598;rs182355396;rs1264194;rs73083140;rs113893318;rs116192940;rs138484388;rs736471;rs11720093;rs140269757;rs114182490;rs7308914…	107	chr3:46899362-52090566	4.61e-82	ENSG00000114353	GNAI2	5.8e-06	TRUE	<0.01
rs75033012	1	chr11:61282785-61348620	1.38e-11	ENSG00000011347	SYT7	5.83e-06	TRUE	<0.01
rs117820415	1	chr11:119076752-119177651	1.62e-06	ENSG00000110395	CBL	5.93e-06	TRUE	<0.01
rs8024	3	chr1:201592411-201915716	1.13e-14	ENSG00000198700	IPO9	5.97e-06	TRUE	<0.01
rs730384;rs7154563	9	chr14:74872596-75370448	9.38e-13	ENSG00000183379	SYNDIG1L	5.99e-06	TRUE	<0.01
rs56013521	2	chr22:43192508-43411151	2.08e-07	ENSG00000100266	PACSIN2	5.99e-06	TRUE	<0.01
rs4685448	2	chr3:237441-451090	1.07e-06	ENSG00000224318	CHL1-AS2	6.04e-06	TRUE	<0.01
rs638956	4	chr22:20067755-20135530	5.36e-08	ENSG00000128191	DGCR8	6.2e-06	FALSE	<0.01
rs638956	4	chr22:20067755-20135530	5.36e-08	ENSG00000099901	RANBP1	6.55e-06	FALSE	<0.01
rs9373363	1	chr6:143072604-143266338	5.54e-12	ENSG00000010818	HIVEP2	6.55e-06	TRUE	<0.01
rs2406253;rs10241492;rs4134932	17	chr7:99699172-100092422	3.58e-14	ENSG00000213420	GPC2	6.56e-06	FALSE	<0.01
rs150537577;rs62294077	3	chr4:699537-819986	9.5e-09	ENSG00000185619	PCGF3	6.63e-06	TRUE	<0.01
rs853199	5	chr17:35441923-35969488	1.76e-06	ENSG00000161326	DUSP14	6.68e-06	TRUE	<0.01
rs262986	2	chr3:183415606-183543382	1.01e-06	ENSG00000180834	MAP6D1	6.76e-06	FALSE	<0.01
rs3789557	2	chr1:5922871-6161253	8.54e-06	ENSG00000069424	KCNAB2	6.99e-06	FALSE	<0.01
rs1434630;rs12519073;rs713584;rs35215630;rs147414517	1	chr5:136310987-136934068	4.63e-12	ENSG00000152377	SPOCK1	7.02e-06	TRUE	<0.01
rs34801323;rs1354241	1	chr3:2140497-3099645	2.55e-06	ENSG00000144619	CNTN4	7.19e-06	TRUE	<0.01
rs62092949;rs72923382	1	chr18:48700920-48723690	4.86e-10	ENSG00000176624	MEX3C	7.2e-06	TRUE	<0.01
rs3751331;rs138569349;rs1148547	20	chr12:57984957-58351052	1.75e-11	ENSG00000135407	AVIL	7.24e-06	FALSE	<0.01
rs7080662	3	chr10:69556427-69835105	1.21e-06	ENSG00000096717	SIRT1	7.29e-06	FALSE	<0.01
rs537342;rs4656013	1	chr1:89149905-89301938	6.09e-08	ENSG00000065243	PKN2	7.42e-06	TRUE	<0.01
rs17048855;rs9857920;rs6808050;rs487947;rs6443069	2	chr3:6532166-7783215	3.1e-13	ENSG00000196277	GRM7	7.45e-06	TRUE	<0.01
rs17747544;rs6030378;rs1006749;rs2903624;rs7272983	2	chr20:40701392-41818610	1.74e-10	ENSG00000196090	PTPRT	7.56e-06	TRUE	<0.01
rs151257075;rs16837272	17	chr1:156182773-156647189	7.96e-06	ENSG00000132702	HAPLN2	7.73e-06	FALSE	<0.01
rs6672986;rs6425305;rs114720347;rs76160630;rs146693799	16	chr1:173386932-174992561	6.42e-11	ENSG00000183831	ANKRD45	7.82e-06	FALSE	<0.01
rs11853464	6	chr15:75628232-75918156	4.4e-06	ENSG00000169410	PTPN9	7.97e-06	TRUE	<0.01
rs12646216;rs11936404	1	chr4:46037786-46126098	4.56e-09	ENSG00000163285	GABRG1	8.22e-06	TRUE	<0.01
rs4737893	1	chr8:69242957-69731257	3.5e-06	ENSG00000165084	C8orf34	8.28e-06	TRUE	<0.01
rs7257285;rs7255223;rs10410583	3	chr19:32836514-32976795	9.92e-12	ENSG00000178904	DPY19L3	8.29e-06	TRUE	<0.01
rs17732878	6	chr17:7328935-7417933	4.06e-08	ENSG00000174282	ZBTB4	8.33e-06	FALSE	<0.01
rs12619019;rs138094079;rs11690765	5	chr2:202937978-203634480	1.1e-07	ENSG00000182329	-	8.73e-06	TRUE	<0.01
rs67790232;rs10880872	2	chr12:46123448-46385903	6.9e-09	ENSG00000139218	SCAF11	8.98e-06	TRUE	<0.01
rs17428076;rs145018899;rs115530688;rs116539725	4	chr2:172629992-172947158	6.41e-17	ENSG00000228389	-	9.09e-06	TRUE	<0.01
rs3751331;rs138569349;rs1148547	20	chr12:57984957-58351052	1.75e-11	ENSG00000255737	-	9.12e-06	FALSE	<0.01
rs12981405	6	chr19:19375174-19657468	2.75e-09	ENSG00000167491	GATAD2A	9.18e-06	FALSE	<0.01
rs12468040;rs72792395;rs163229;rs4952728;rs698819	5	chr2:44502599-45173216	3.12e-21	ENSG00000138083	SIX3	9.24e-06	FALSE	<0.01
rs12464368	13	chr2:27505260-27746554	8.64e-07	ENSG00000115207	GTF3C2	9.25e-06	FALSE	<0.01
rs9927410	1	chr16:77224819-77236302	5.11e-08	ENSG00000103111	MON1B	9.33e-06	TRUE	<0.01
rs12746551;rs1418609;rs141196516	5	chr1:113933371-114430169	1.44e-09	ENSG00000081026	MAGI3	9.43e-06	TRUE	<0.01
rs9529146;rs4941735;rs12585794;rs73174648	2	chr13:31710762-31906413	3.48e-14	ENSG00000120694	HSPH1	9.44e-06	TRUE	<0.01
rs181214;rs77154762	1	chr17:56160780-56167618	8.19e-10	ENSG00000121083	DYNLL2	9.47e-06	TRUE	<0.01
rs12453682	9	chr17:37408897-37884915	1.81e-11	ENSG00000167258	CDK12	9.48e-06	FALSE	<0.01
rs1866823;rs1012180	2	chr8:57335949-57472382	3.09e-14	ENSG00000181195	PENK	9.53e-06	FALSE	<0.01
rs75177132	2	chr19:4360370-4443394	1.01e-16	ENSG00000141985	SH3GL1	9.57e-06	TRUE	<0.01
rs2406253;rs10241492;rs4134932	17	chr7:99699172-100092422	3.58e-14	ENSG00000166925	TSC22D4	9.63e-06	TRUE	<0.01
rs4891258;rs11660312	1	chr18:72922710-73001905	3.52e-06	ENSG00000179981	TSHZ1	9.7e-06	TRUE	<0.01
rs4867608	1	chr5:169780491-170163636	1.12e-06	ENSG00000182132	KCNIP1	9.9e-06	FALSE	<0.01
rs12406824	1	chr1:4714792-4843850	6.4e-06	ENSG00000196581	AJAP1	9.9e-06	TRUE	<0.01
rs148526428;rs145480052	17	chr12:110288959-111180744	4.87e-07	ENSG00000139437	TCHP	9.97e-06	FALSE	<0.01
rs117340654;rs642803;rs585557;rs76878669;rs35947684;rs118151305;rs10896139;rs116864252;rs4930188;rs35111506;rs72939178;rs479018;rs7127808;rs7120517;rs118011160;rs117309574	93	chr11:65029233-67407031	3.1e-17	ENSG00000179292	TMEM151A	9.98e-06	TRUE	<0.01
rs75943566	6	chr3:159974774-160396233	1.59e-06	ENSG00000186432	KPNA4	1.01e-05	FALSE	<0.01
rs2802290	1	chr6:108881038-109005977	5.57e-08	ENSG00000118689	FOXO3	1.04e-05	TRUE	<0.01
rs7430651;rs11917701;rs2088913;rs16826431;rs10934369;rs56367524	1	chr3:115528641-117716095	9.38e-13	ENSG00000185565	LSAMP	1.08e-05	TRUE	<0.01
rs145054300;rs77675579	19	chr11:46299212-47357945	7.18e-08	ENSG00000175216	CKAP5	1.08e-05	FALSE	<0.01
rs11853464	6	chr15:75628232-75918156	4.4e-06	ENSG00000169375	SIN3A	1.14e-05	FALSE	<0.01
rs3751331;rs138569349;rs1148547	20	chr12:57984957-58351052	1.75e-11	ENSG00000135502	SLC26A10	1.15e-05	FALSE	<0.01
rs10937240	2	chr3:185764097-186080026	6.95e-12	ENSG00000244405	ETV5	1.17e-05	TRUE	<0.01
rs11592299;rs3781339;rs12774577;rs10748841;rs76957677;rs2986016;rs1538205;rs146952142;rs138873813;rs3740409	22	chr10:104221149-105615301	8.69e-13	ENSG00000138107	ACTR1A	1.2e-05	FALSE	<0.01
rs62007304;rs113274654;rs34080199	2	chr15:77400471-77777949	1.8e-08	ENSG00000173517	-	1.21e-05	FALSE	<0.01
rs7502541;rs9902820;rs62082093	14	chr17:56422539-57353322	3.9e-07	ENSG00000182628	SKA2	1.24e-05	TRUE	<0.01
rs6067645;rs6020911	1	chr20:49620193-49639666	8.67e-08	ENSG00000026559	KCNG1	1.25e-05	TRUE	<0.01
rs2011603;rs114192810;rs16898037;rs6836877;rs1947361	5	chr4:17578815-18023499	1.12e-08	ENSG00000178177	LCORL	1.26e-05	TRUE	<0.01
rs79994730;rs116086472;rs7524020;rs550021	10	chr1:75593515-77100286	5.88e-12	ENSG00000184005	ST6GALNAC3	1.28e-05	FALSE	<0.01
rs1051860;rs71414197	5	chr14:58466453-58840605	3.29e-08	ENSG00000257621	-	1.38e-05	TRUE	<0.01
rs1128956;rs4607270	1	chr4:183065140-183724177	5.34e-14	ENSG00000218336	ODZ3	1.4e-05	TRUE	<0.01
rs12601380	7	chr17:34842479-34965397	7.42e-09	ENSG00000005955	GGNBP2	1.45e-05	TRUE	<0.01
rs9306268	6	chr22:31795509-32303001	3.55e-06	ENSG00000100150	DEPDC5	1.46e-05	FALSE	<0.01
rs2625566	2	chr17:65373924-65740318	1.42e-06	ENSG00000154217	PITPNC1	1.47e-05	FALSE	<0.01
rs8019235;rs10130443;rs34074136	2	chr14:42057064-42373752	7.99e-07	ENSG00000258636	-	1.48e-05	TRUE	<0.01
rs2366604	5	chr2:179278666-179370093	5.9e-06	ENSG00000180228	PRKRA	1.49e-05	FALSE	<0.01
rs8008382	3	chr14:103995521-104167888	4.07e-12	ENSG00000166170	BAG5	1.5e-05	TRUE	<0.01
rs917726	3	chr7:120965421-121038821	6.71e-07	ENSG00000196937	FAM3C	1.53e-05	TRUE	<0.01
rs35177116;rs60044461	1	chr4:20254883-20622184	3.84e-06	ENSG00000145147	SLIT2	1.54e-05	TRUE	<0.01
rs1064193	5	chr11:118964564-119033360	3.39e-07	ENSG00000188486	H2AFX	1.55e-05	TRUE	<0.01
rs12453682	9	chr17:37408897-37884915	1.81e-11	ENSG00000125686	MED1	1.55e-05	FALSE	<0.01
rs10761251;rs2989751	1	chr9:96338689-96441869	2.52e-14	ENSG00000197724	PHF2	1.56e-05	TRUE	<0.01
rs232496;rs74514739;rs117958414	1	chr21:22370633-22915650	7.14e-10	ENSG00000154654	NCAM2	1.58e-05	TRUE	<0.01
rs12506004	2	chr4:9772777-10118573	1.09e-06	ENSG00000071127	WDR1	1.64e-05	FALSE	<0.01
rs73518807;rs1685696;rs61382873	3	chr11:68028803-68382802	1.15e-09	ENSG00000110075	PPP6R3	1.65e-05	TRUE	<0.01
rs35577195	3	chr6:89805678-89940997	1.4e-06	ENSG00000146276	GABRR1	1.68e-05	FALSE	<0.01
rs9927842	3	chr16:15068599-15233195	6.22e-11	ENSG00000157045	NTAN1	1.68e-05	TRUE	<0.01
rs6060001	12	chr20:32951041-33680674	7.47e-07	ENSG00000225336	HMGB3P1	1.73e-05	FALSE	<0.01
rs6121037	11	chr20:34042985-34547394	1.32e-07	ENSG00000025293	PHF20	1.76e-05	FALSE	<0.01
rs3751331;rs138569349;rs1148547	20	chr12:57984957-58351052	1.75e-11	ENSG00000139266	42803	1.77e-05	FALSE	<0.01
rs165633;rs145974062	6	chr22:29833006-30094587	1.27e-12	ENSG00000186575	NF2	1.78e-05	FALSE	<0.01
rs1171040;rs35843798	2	chr1:190066792-190449865	5.07e-11	ENSG00000162670	FAM5C	1.79e-05	TRUE	<0.01
rs710629;rs75239758	1	chr12:67663061-67713731	2.09e-08	ENSG00000111530	CAND1	1.86e-05	TRUE	<0.01
rs35745455;rs13236282	1	chr7:5659678-5821370	1.43e-08	ENSG00000011275	RNF216	1.87e-05	TRUE	<0.01
rs7716161	3	chr5:72112139-72427644	3e-08	ENSG00000083312	TNPO1	1.87e-05	TRUE	<0.01
rs76577427;rs2761438;rs6689641	2	chr1:110693108-110825722	7.78e-18	ENSG00000116396	KCNC4	1.87e-05	TRUE	<0.01
rs638956	4	chr22:20067755-20135530	5.36e-08	ENSG00000099904	ZDHHC8	1.87e-05	TRUE	<0.01
rs117340654;rs642803;rs585557;rs76878669;rs35947684;rs118151305;rs10896139;rs116864252;rs4930188;rs35111506;rs72939178;rs479018;rs7127808;rs7120517;rs118011160;rs117309574	93	chr11:65029233-67407031	3.1e-17	ENSG00000133884	DPF2	1.87e-05	FALSE	<0.01
rs10810099;rs7875078;rs10810145;rs7027899;rs2382460	1	chr9:14081842-14398982	1.91e-20	ENSG00000147862	NFIB	1.89e-05	TRUE	<0.01
rs1335482;rs12754946;rs2647504;rs114020893	10	chr1:77747736-78835149	1.01e-11	ENSG00000036549	ZZZ3	1.95e-05	TRUE	<0.01
rs1335482;rs12754946;rs2647504;rs114020893	10	chr1:77747736-78835149	1.01e-11	ENSG00000162613	FUBP1	1.95e-05	FALSE	<0.01
rs114468556;rs17669337;rs141834426;rs6890998;rs2029401;rs10074178;rs17315154;rs6873367;rs13175613;rs10059375	8	chr5:92746995-94620279	1.99e-16	ENSG00000175471	MCTP1	2.02e-05	FALSE	<0.01
rs7176647;rs13329348	1	chr15:99192200-99507759	1.19e-07	ENSG00000140443	IGF1R	2.04e-05	TRUE	<0.01
rs117340654;rs642803;rs585557;rs76878669;rs35947684;rs118151305;rs10896139;rs116864252;rs4930188;rs35111506;rs72939178;rs479018;rs7127808;rs7120517;rs118011160;rs117309574	93	chr11:65029233-67407031	3.1e-17	ENSG00000173120	KDM2A	2.05e-05	FALSE	<0.01
rs1408284;rs17686649;rs633279;rs2787746	1	chr6:93949738-94129265	5.71e-10	ENSG00000135333	EPHA7	2.14e-05	TRUE	<0.01
rs143141266	1	chr4:148999913-149365850	1.37e-07	ENSG00000151623	NR3C2	2.15e-05	TRUE	<0.01
rs67432955	1	chr4:115748919-116035032	3.17e-06	ENSG00000138653	NDST4	2.16e-05	TRUE	<0.01
rs12503522;rs4693318;rs6834210;rs10213431	1	chr4:93225550-94695707	3.93e-13	ENSG00000152208	GRID2	2.22e-05	TRUE	<0.01
rs12888615;rs2332752;rs149671;rs10130488;rs6574018	3	chr14:71787166-73030654	9.42e-12	ENSG00000182732	RGS6	2.23e-05	TRUE	<0.01
rs35550545;rs188415602;rs12718416;rs192569608;rs144581493	33	chr1:149900543-151098018	1.04e-07	ENSG00000143437	ARNT	2.24e-05	FALSE	<0.01
rs13145650;rs75246386	6	chr4:122680088-122872909	8.99e-12	ENSG00000138741	TRPC3	2.24e-05	TRUE	<0.01
rs2702576	2	chr4:14911585-15071777	4.41e-10	ENSG00000247624	-	2.27e-05	FALSE	<0.01
rs11845781	3	chr14:89078775-89344335	2.43e-08	ENSG00000165521	EML5	2.4e-05	FALSE	<0.01
rs28607463;rs3896701	4	chr3:132136370-132593067	7.71e-06	ENSG00000138246	DNAJC13	2.43e-05	FALSE	<0.01
rs4434676;rs6560155;rs138175676	2	chr9:72999503-74061820	2.83e-10	ENSG00000083067	TRPM3	2.46e-05	FALSE	<0.01
rs6974672;rs12671374;rs10280313	1	chr7:8152814-8302317	4.92e-07	ENSG00000003147	ICA1	2.5e-05	TRUE	<0.01
rs34604401	1	chr5:157212751-157286183	6.39e-08	ENSG00000113282	CLINT1	2.51e-05	TRUE	<0.01
rs17139903	1	chr5:115779312-115910630	8.58e-06	ENSG00000092421	SEMA6A	2.52e-05	TRUE	<0.01
rs79523955	6	chr1:28696114-28969597	3.79e-09	ENSG00000204138	PHACTR4	2.54e-05	FALSE	<0.01
rs13029602;rs4665461;rs78054872;rs2246046	1	chr2:29415640-30144432	1.33e-10	ENSG00000171094	ALK	2.56e-05	TRUE	<0.01
rs12453682	9	chr17:37408897-37884915	1.81e-11	ENSG00000131771	PPP1R1B	2.56e-05	FALSE	<0.01
rs11030102;rs11030084	5	chr11:27387508-27899195	4.6e-10	ENSG00000176697	BDNF	2.59e-05	TRUE	<0.01
rs10073918	1	chr5:83236373-83680611	6.84e-06	ENSG00000164176	EDIL3	2.6e-05	FALSE	<0.01
rs7962636	1	chr12:116395711-116715143	2.77e-07	ENSG00000123066	MED13L	2.65e-05	TRUE	<0.01
rs2406253;rs10241492;rs4134932	17	chr7:99699172-100092422	3.58e-14	ENSG00000146834	MEPCE	2.71e-05	FALSE	<0.01
rs3103307;rs11537608;rs62070648	12	chr17:28575223-29708905	2.04e-07	ENSG00000250288	-	2.77e-05	FALSE	<0.01
rs144908022	19	chr11:64590859-64902004	4.21e-06	ENSG00000162300	ZFPL1	2.92e-05	FALSE	<0.01
rs11869798	2	chr17:80477589-80606411	3.84e-06	ENSG00000141580	WDR45L	2.95e-05	TRUE	<0.01
rs6450476;rs12188902;rs2910589	1	chr5:57749809-57756087	4.62e-14	ENSG00000145632	PLK2	3.05e-05	TRUE	<0.01
rs1301838;rs9943498;rs1461680;rs2089171;rs11218606	1	chr11:98891683-100229616	1.29e-10	ENSG00000149972	CNTN5	3.05e-05	TRUE	<0.01
rs74453875;rs62260764;rs11709573;rs9859556;rs3172494;rs74473238;rs144519232;rs55786114;rs2624818;rs71325001;rs34037363;rs55689339;rs141260127;rs112269639;rs11716398;rs190848966;rs55935606;rs62263033;rs116033001;rs77719387;rs140021702;rs6780575;rs3731507;rs116656374;rs62248598;rs182355396;rs1264194;rs73083140;rs113893318;rs116192940;rs138484388;rs736471;rs11720093;rs140269757;rs114182490;rs7308914…	107	chr3:46899362-52090566	4.61e-82	ENSG00000114383	TUSC2	3.06e-05	FALSE	<0.01
rs2990547	1	chr1:237205505-238129359	5.93e-07	ENSG00000198626	RYR2	3.08e-05	FALSE	<0.01
rs10940540;rs13176773	1	chr5:56469775-56560505	3.44e-08	ENSG00000062194	GPBP1	3.1e-05	TRUE	<0.01
rs58779949;rs11231643	24	chr11:63606400-64139687	3.84e-09	ENSG00000173264	GPR137	3.41e-05	FALSE	<0.01
rs12464368	13	chr2:27505260-27746554	8.64e-07	ENSG00000115216	NRBP1	3.44e-05	FALSE	<0.01
rs72737127	5	chr9:34457412-34620515	2.58e-06	ENSG00000168913	ENHO	3.45e-05	FALSE	<0.01
rs73136483;rs35801031	2	chr12:98906751-98944157	7.43e-07	ENSG00000120802	TMPO	3.48e-05	TRUE	<0.01
rs1564347	2	chr15:73344051-73661605	2.39e-09	ENSG00000067141	NEO1	3.49e-05	TRUE	<0.01
rs6712856	10	chr2:219283815-219680016	2.83e-07	ENSG00000115568	ZNF142	3.51e-05	FALSE	<0.01
rs2303929;rs55813292	9	chr7:150642049-150841523	1.34e-07	ENSG00000213199	ACCN3	3.53e-05	FALSE	<0.01
rs57016874	2	chr2:220238268-220586393	1.9e-08	ENSG00000072195	SPEG	3.57e-05	TRUE	<0.01
rs6823423	4	chr4:152330368-152682175	5.9e-06	ENSG00000251455	-	3.63e-05	TRUE	<0.01
rs74615093;rs77295380	12	chr16:68877509-69419859	3.67e-08	ENSG00000168802	CHTF8	3.65e-05	FALSE	<0.01
rs10903358	6	chr10:855484-1178237	1.01e-06	ENSG00000047056	WDR37	3.69e-05	TRUE	<0.01
rs61748951	28	chr1:155158300-156182587	1.31e-08	ENSG00000132680	KIAA0907	3.69e-05	FALSE	<0.01
rs3751331;rs138569349;rs1148547	20	chr12:57984957-58351052	1.75e-11	ENSG00000175215	CTDSP2	3.84e-05	FALSE	<0.01
rs9926649;rs8061964;rs3785092	17	chr16:66460816-66978999	1.58e-08	ENSG00000166546	BEAN1	3.87e-05	FALSE	<0.01
rs2358628;rs75896367;rs75304016;rs3759747	9	chr14:74289262-74826711	1.78e-09	ENSG00000258586	-	3.89e-05	TRUE	<0.01
rs10783243;rs79359351	8	chr12:48366748-48745197	5.8e-11	ENSG00000177875	C12orf68	3.96e-05	FALSE	<0.01
rs2301586	6	chr22:29601840-29819168	2.01e-06	ENSG00000185340	GAS2L1	3.99e-05	TRUE	<0.01
rs117340654;rs642803;rs585557;rs76878669;rs35947684;rs118151305;rs10896139;rs116864252;rs4930188;rs35111506;rs72939178;rs479018;rs7127808;rs7120517;rs118011160;rs117309574	93	chr11:65029233-67407031	3.1e-17	ENSG00000142186	SCYL1	4.01e-05	FALSE	<0.01
rs59615734	1	chr5:139226364-139422884	1.04e-06	ENSG00000158458	NRG2	4.06e-05	TRUE	<0.01
rs1671770;rs1718188;rs10774563;rs113473640	18	chr12:120881764-121623876	9.05e-12	ENSG00000231313	CLIC1P1	4.09e-05	FALSE	<0.01
rs62122067	1	chr19:13987950-13991571	4.95e-06	ENSG00000187556	NANOS3	4.1e-05	TRUE	<0.01
rs117946421	4	chr19:2164148-2256422	9.16e-06	ENSG00000104897	SF3A2	4.14e-05	FALSE	<0.01
rs9611597;rs9607859;rs4822112;rs148537066;rs2899355;rs2142695	35	chr22:41165634-42828401	2.3e-08	ENSG00000172346	CSDC2	4.16e-05	FALSE	<0.01
rs35751693;rs13034349;rs35836525;rs11692435	9	chr2:97541620-98612388	8.04e-10	ENSG00000135976	ANKRD36	4.19e-05	FALSE	<0.01
rs17170519;rs12701263	2	chr7:32535038-33078516	1.99e-08	ENSG00000170852	KBTBD2	4.2e-05	TRUE	<0.01
rs401526	1	chr8:130853716-131029375	1.15e-13	ENSG00000153310	FAM49B	4.22e-05	TRUE	<0.01
rs4984541;rs8028148;rs35625885	2	chr15:96670598-96870590	3.4e-16	ENSG00000247809	-	4.27e-05	TRUE	<0.01
rs4907307	9	chr2:96916312-97370624	2.01e-06	ENSG00000144028	SNRNP200	4.34e-05	FALSE	<0.01
rs12403957	1	chr1:102268127-102462586	1.11e-07	ENSG00000118733	OLFM3	4.36e-05	TRUE	<0.01
rs12076635;rs112361411;rs2428954;rs45605334;rs145155829;rs1198982;rs61768375;rs1362153;rs1999595;rs150833155	25	chr1:43629846-44497139	3.33e-34	ENSG00000198198	SZT2	4.37e-05	FALSE	<0.01
rs61757207	11	chr16:70147529-70694585	1.27e-08	ENSG00000090861	AARS	4.41e-05	FALSE	<0.01
rs10940921;rs7716190	1	chr5:31193857-31329253	1.31e-14	ENSG00000113361	CDH6	4.6e-05	TRUE	<0.01
rs1956759	1	chr14:25278862-25519503	6.9e-06	ENSG00000168952	STXBP6	4.65e-05	TRUE	<0.01
rs117340654;rs642803;rs585557;rs76878669;rs35947684;rs118151305;rs10896139;rs116864252;rs4930188;rs35111506;rs72939178;rs479018;rs7127808;rs7120517;rs118011160;rs117309574	93	chr11:65029233-67407031	3.1e-17	ENSG00000174903	RAB1B	4.71e-05	FALSE	<0.01
rs72751651	9	chr1:224102741-226595780	7.54e-06	ENSG00000143756	FBXO28	4.79e-05	TRUE	<0.01
rs12438177;rs28693968;rs12148407	3	chr15:55831082-56285835	1.48e-10	ENSG00000171016	PYGO1	4.88e-05	TRUE	<0.01
rs79772024	1	chr16:24550908-24584184	1.07e-06	ENSG00000122257	RBBP6	4.88e-05	TRUE	<0.01
rs1582931;rs147987632;rs74723465	2	chr5:122680579-122952739	1.57e-07	ENSG00000168944	CEP120	4.96e-05	TRUE	<0.01
rs9888861	1	chr16:75681635-75691338	5.93e-06	ENSG00000166848	TERF2IP	5.1e-05	TRUE	<0.01
rs6937228	2	chr6:55039050-55444012	9.08e-06	ENSG00000146151	HMGCLL1	5.16e-05	FALSE	<0.01
rs11635084	1	chr15:78729773-78793798	1.98e-07	ENSG00000136381	IREB2	5.26e-05	TRUE	<0.01
rs13281564;rs62533398;rs73317303	1	chr8:119201698-119634234	4.02e-10	ENSG00000177570	SAMD12	5.27e-05	TRUE	<0.01
rs73874335;rs79345545;rs698979	6	chr3:157823644-158450485	1.29e-09	ENSG00000174891	RSRC1	5.37e-05	FALSE	<0.01
rs580693	3	chr1:28473677-28609002	6.6e-06	ENSG00000130766	SESN2	5.41e-05	TRUE	<0.01
rs8009933	4	chr14:39501123-39652422	4.72e-09	ENSG00000100934	SEC23A	5.45e-05	FALSE	<0.01
rs1047586	7	chr7:149941005-150109558	2.86e-07	ENSG00000240449	-	5.55e-05	FALSE	<0.01
rs74453875;rs62260764;rs11709573;rs9859556;rs3172494;rs74473238;rs144519232;rs55786114;rs2624818;rs71325001;rs34037363;rs55689339;rs141260127;rs112269639;rs11716398;rs190848966;rs55935606;rs62263033;rs116033001;rs77719387;rs140021702;rs6780575;rs3731507;rs116656374;rs62248598;rs182355396;rs1264194;rs73083140;rs113893318;rs116192940;rs138484388;rs736471;rs11720093;rs140269757;rs114182490;rs7308914…	107	chr3:46899362-52090566	4.61e-82	ENSG00000164068	RNF123	5.71e-05	FALSE	<0.01
rs117340654;rs642803;rs585557;rs76878669;rs35947684;rs118151305;rs10896139;rs116864252;rs4930188;rs35111506;rs72939178;rs479018;rs7127808;rs7120517;rs118011160;rs117309574	93	chr11:65029233-67407031	3.1e-17	ENSG00000174684	B3GNT1	5.72e-05	FALSE	<0.01
rs3857109	1	chr4:24519064-24586173	2.54e-06	ENSG00000109606	DHX15	5.72e-05	TRUE	<0.01
rs117791788;rs11972612;rs11763155	1	chr7:66752528-66767894	5.79e-07	ENSG00000067601	PMS2P4	5.81e-05	TRUE	<0.01
rs1171040;rs35843798	2	chr1:190066792-190449865	5.07e-11	ENSG00000237457	-	5.89e-05	FALSE	<0.01
rs17604349;rs62051146;rs17668674;rs35999374;rs9927049;rs138696382;rs34113301;rs62055046	21	chr16:70721342-72210777	2.36e-12	ENSG00000182149	IST1	5.97e-05	FALSE	<0.01
rs6881581	10	chr5:140710252-140998622	1.08e-10	ENSG00000131504	DIAPH1	5.98e-05	FALSE	<0.01
rs113054910	2	chr3:36421836-36781352	2.18e-06	ENSG00000144681	STAC	6.04e-05	TRUE	<0.01
rs9595885	4	chr13:32974861-33352157	7.58e-07	ENSG00000230905	N4BP2L2-IT1	6.22e-05	FALSE	<0.01
rs6060001	12	chr20:32951041-33680674	7.47e-07	ENSG00000100991	TRPC4AP	6.26e-05	FALSE	<0.01
rs113238975	1	chr3:14961854-14989931	4.52e-06	ENSG00000225733	-	6.44e-05	FALSE	<0.01
rs575113;rs12119154	9	chr1:109852192-110155679	7.52e-18	ENSG00000162650	ATXN7L2	6.66e-05	FALSE	<0.01
rs6493265;rs1656614;rs1813204;rs4774494;rs550781;rs7169340;rs1398207;rs74013810	1	chr15:47476298-48066420	2.26e-17	ENSG00000137872	SEMA6D	6.68e-05	TRUE	<0.01
rs9855241;rs17602269	3	chr3:11178779-11762220	3.88e-07	ENSG00000197548	ATG7	6.69e-05	FALSE	<0.01
rs7526112;rs145702246;rs78382133;rs55689191	5	chr1:93544792-93828149	2.07e-17	ENSG00000117505	DR1	6.97e-05	TRUE	<0.01
rs34305371;rs2568955;rs1486108;rs12143094;rs72677177;rs481940;rs12028229;rs1445591;rs114030538;rs11209767;rs75977774;rs782231	4	chr1:71318036-72748417	1.1e-39	ENSG00000132485	ZRANB2	6.97e-05	TRUE	<0.01
rs34262657;rs11631042	2	chr15:63796793-64126147	2.84e-10	ENSG00000140455	USP3	7.3e-05	TRUE	<0.01
rs933738	7	chr12:49760367-50158717	2.08e-09	ENSG00000187778	MCRS1	7.37e-05	FALSE	<0.01
rs6440053	2	chr3:141594966-141868386	1.54e-06	ENSG00000069849	ATP1B3	7.37e-05	TRUE	<0.01
rs74453875;rs62260764;rs11709573;rs9859556;rs3172494;rs74473238;rs144519232;rs55786114;rs2624818;rs71325001;rs34037363;rs55689339;rs141260127;rs112269639;rs11716398;rs190848966;rs55935606;rs62263033;rs116033001;rs77719387;rs140021702;rs6780575;rs3731507;rs116656374;rs62248598;rs182355396;rs1264194;rs73083140;rs113893318;rs116192940;rs138484388;rs736471;rs11720093;rs140269757;rs114182490;rs7308914…	107	chr3:46899362-52090566	4.61e-82	ENSG00000177479	ARIH2	7.41e-05	FALSE	<0.01
rs7683416;rs1490612;rs2726471;rs13150647;rs1472067;rs78839463;rs76612790;rs75197938	4	chr4:106067032-106925184	6.05e-23	ENSG00000168769	TET2	7.43e-05	TRUE	<0.01
rs135330;rs135354	1	chr22:48440527-48444366	5.02e-07	ENSG00000235154	-	7.46e-05	TRUE	<0.01
rs9888796;rs62059344;rs255053;rs111965666;rs3868142	51	chr16:67143915-68601039	1.2e-12	ENSG00000072736	NFATC3	7.62e-05	FALSE	<0.01
rs114468556;rs17669337;rs141834426;rs6890998;rs2029401;rs10074178;rs17315154;rs6873367;rs13175613;rs10059375	8	chr5:92746995-94620279	1.99e-16	ENSG00000237187	-	7.62e-05	FALSE	<0.01
rs6713523;rs67822265	5	chr2:53759810-54197977	2.01e-06	ENSG00000115239	ASB3	7.64e-05	TRUE	<0.01
rs12464368	13	chr2:27505260-27746554	8.64e-07	ENSG00000138002	IFT172	7.65e-05	TRUE	<0.01
rs111229591	1	chr6:86267696-86353510	3.3e-06	ENSG00000135316	SYNCRIP	7.84e-05	TRUE	<0.01
rs61757207	11	chr16:70147529-70694585	1.27e-08	ENSG00000090857	PDPR	7.87e-05	FALSE	<0.01
rs9882532;rs4685422;rs12495993;rs11707670;rs6442653	1	chr3:16844159-17132094	2.15e-17	ENSG00000154822	PLCL2	7.88e-05	TRUE	<0.01
rs17568389;rs7786263;rs73049290	2	chr7:7680342-8133902	1.62e-19	ENSG00000219545	-	7.91e-05	FALSE	<0.01
rs12419444	1	chr11:2185159-2193107	6.08e-07	ENSG00000180176	TH	8.09e-05	TRUE	<0.01
rs12440468	9	chr15:40820882-41099675	9.61e-07	ENSG00000104129	DNAJC17	8.13e-05	FALSE	<0.01
rs6567288	1	chr18:60190658-60245793	2.81e-08	ENSG00000141664	ZCCHC2	8.24e-05	TRUE	<0.01
rs74415461;rs118124826;rs35754755;rs4785577;rs9673820;rs9932312;rs12917772;rs8047204	26	chr16:89154783-90142338	6.25e-12	ENSG00000221819	C16orf3	8.42e-05	TRUE	<0.01
rs1149713	2	chr10:77029577-77161664	3.58e-07	ENSG00000226051	ZNF503-AS1	8.43e-05	TRUE	<0.01
rs7716161	3	chr5:72112139-72427644	3e-08	ENSG00000157107	FCHO2	8.46e-05	FALSE	<0.01
rs117340654;rs642803;rs585557;rs76878669;rs35947684;rs118151305;rs10896139;rs116864252;rs4930188;rs35111506;rs72939178;rs479018;rs7127808;rs7120517;rs118011160;rs117309574	93	chr11:65029233-67407031	3.1e-17	ENSG00000087365	SF3B2	8.49e-05	FALSE	<0.01
rs2740795	5	chr8:91803778-92099323	7.71e-10	ENSG00000253250	-	8.62e-05	TRUE	<0.01
rs117340654;rs642803;rs585557;rs76878669;rs35947684;rs118151305;rs10896139;rs116864252;rs4930188;rs35111506;rs72939178;rs479018;rs7127808;rs7120517;rs118011160;rs117309574	93	chr11:65029233-67407031	3.1e-17	ENSG00000175467	SART1	8.72e-05	FALSE	<0.01
rs117340654;rs642803;rs585557;rs76878669;rs35947684;rs118151305;rs10896139;rs116864252;rs4930188;rs35111506;rs72939178;rs479018;rs7127808;rs7120517;rs118011160;rs117309574	93	chr11:65029233-67407031	3.1e-17	ENSG00000175550	DRAP1	8.79e-05	FALSE	<0.01
rs7381738	1	chr6:166322290-166401527	5e-06	ENSG00000223414	LINC00473	8.88e-05	TRUE	<0.01
rs12827740	3	chr12:46581584-46767561	3.74e-06	ENSG00000134294	SLC38A2	8.88e-05	TRUE	<0.01
rs6121037	11	chr20:34042985-34547394	1.32e-07	ENSG00000171222	SCAND1	9.05e-05	FALSE	<0.01
rs74453875;rs62260764;rs11709573;rs9859556;rs3172494;rs74473238;rs144519232;rs55786114;rs2624818;rs71325001;rs34037363;rs55689339;rs141260127;rs112269639;rs11716398;rs190848966;rs55935606;rs62263033;rs116033001;rs77719387;rs140021702;rs6780575;rs3731507;rs116656374;rs62248598;rs182355396;rs1264194;rs73083140;rs113893318;rs116192940;rs138484388;rs736471;rs11720093;rs140269757;rs114182490;rs7308914…	107	chr3:46899362-52090566	4.61e-82	ENSG00000213600	-	9.29e-05	FALSE	<0.01
rs10785268;rs17582686	2	chr12:41582250-41968392	2.57e-07	ENSG00000165966	PDZRN4	9.3e-05	FALSE	<0.01
rs854796;rs113269212	17	chr17:17750139-18639432	4.66e-09	ENSG00000177731	FLII	9.4e-05	FALSE	<0.01
rs55826493;rs6757521	1	chr2:12857015-12882860	3.16e-09	ENSG00000071575	TRIB2	9.62e-05	TRUE	<0.01
rs10029499	2	chr4:54243810-55164414	1.75e-06	ENSG00000145216	FIP1L1	9.7e-05	FALSE	<0.01
rs13026611;rs10211291	5	chr2:127941696-128284462	1.05e-08	ENSG00000163166	IWS1	9.74e-05	FALSE	<0.01
rs72739910	1	chr15:60296421-60353929	6.17e-06	ENSG00000171956	FOXB1	9.76e-05	TRUE	<0.01
[truncated: 3,230 more rows]

## Sheet: 8. DEPICT Gene Sets - FDR05
Supplementary Table 8. Significantly enriched DEPICT gene sets
[truncated: 1,920 more rows]

## Sheet: 9. stratLDSC - Cahoy
Supplementary Table 9. Heritability enrichment of genes highly expressed in neural cell types
[truncated: 9 more rows]

## Sheet: 10. CAVIARBF - ENET SNPs
Supplementary Table 10. Candidates for causal SNPs selected by CAVIARBF with elastic net
[truncated: 131 more rows]
[truncated: 490 more columns]

[truncated: 35 more sheets: 11. Math Ability Lead SNPs, 12. Highest Math Lead SNPs, 13. Cog. Performance Lead SNPs, 14. LDSC_rg, 15. MTAG Associations, 16. Cohorts, 17. Cohort Pheno. Descr., 18. Genotyping and Imputation, 19. Association Analysis, 20. Sign Test Results, 21. Comparative, 22. Cohort Characteristics, 23. Genetic Correlations, 24. Variable Summaries, 25. Table Regression Models, 26. UKB X Analyses, 27. DEPICT Gene Sets - P1, 28. DEPICT Across Traits, 29. MAGMA Genes, 3.4 Regression_Models …]
